# Supplementary material for: Unraveling Protein Interactions between the Temperate Virus Bam35 and Its Bacillus Host Using an Integrative Yeast Two Hybrid–High Throughput Sequencing Approach
Source: Int J Mol Sci. 2021 Oct 14;22(20):11105. doi: 10.3390/ijms222011105 (PMC8539640; doi:10.3390/ijms222011105)
Supplement: Supplementary file 1 [file ijms-22-11105-s001.zip › Supplementary Tables.xlsx]

## Sheet: Supplementary_Table_1
Supplementary Table 1. Y2H validated fragments for HER1410 pPC and pPN genomic libraries
Bt_Locus	Read counts	Normalized read counts (count per 100 reads)	log10 of the total reads	Library
HBA75_00145	4	0.00015064	1	pPC_Library
HBA75_00375	42	0.00158171	2	pPC_Library
HBA75_00460	2	7.53198e-05	1	pPC_Library
HBA75_00465	48	0.00180767	2	pPC_Library
HBA75_00715	45	0.00169469	2	pPC_Library
HBA75_00720	25	0.000941497	2	pPC_Library
HBA75_00725	19	0.000715538	2	pPC_Library
HBA75_00745	55	0.00207129	2	pPC_Library
HBA75_00835	2	7.53198e-05	1	pPC_Library
HBA75_00860	3	0.00011298	1	pPC_Library
HBA75_00865	4	0.00015064	1	pPC_Library
HBA75_01030	39	0.00146874	2	pPC_Library
HBA75_01050	331	0.0124654	3	pPC_Library
HBA75_01145	42	0.00158171	2	pPC_Library
HBA75_01150	34	0.00128044	2	pPC_Library
HBA75_01185	65	0.00244789	2	pPC_Library
HBA75_01190	65	0.00244789	2	pPC_Library
HBA75_01440	1	3.76599e-05	1	pPC_Library
HBA75_01455	14	0.000527238	2	pPC_Library
HBA75_01625	1	3.76599e-05	1	pPC_Library
HBA75_01850	2	7.53198e-05	1	pPC_Library
HBA75_01870	58	0.00218427	2	pPC_Library
HBA75_01930	31	0.00116746	2	pPC_Library
HBA75_01995	7	0.000263619	1	pPC_Library
HBA75_02235	106	0.00399195	3	pPC_Library
HBA75_02280	2	7.53198e-05	1	pPC_Library
HBA75_02375	2	7.53198e-05	1	pPC_Library
HBA75_02545	16	0.000602558	2	pPC_Library
HBA75_02600	63	0.00237257	2	pPC_Library
HBA75_02620	900	0.0338939	3	pPC_Library
HBA75_02665	3	0.00011298	1	pPC_Library
HBA75_02780	72	0.00271151	2	pPC_Library
HBA75_02835	1	3.76599e-05	1	pPC_Library
HBA75_02890	266	0.0100175	3	pPC_Library
HBA75_02970	7	0.000263619	1	pPC_Library
HBA75_03035	26	0.000979157	2	pPC_Library
HBA75_03040	3	0.00011298	1	pPC_Library
HBA75_03095	9	0.000338939	1	pPC_Library
HBA75_03135	1	3.76599e-05	1	pPC_Library
HBA75_03335	21	0.000790857	2	pPC_Library
HBA75_03420	1	3.76599e-05	1	pPC_Library
HBA75_03425	1	3.76599e-05	1	pPC_Library
HBA75_03595	217	0.00817219	3	pPC_Library
HBA75_03605	5	0.000188299	1	pPC_Library
HBA75_03670	836	0.0314837	3	pPC_Library
HBA75_03795	6	0.000225959	1	pPC_Library
HBA75_03805	171	0.00643984	3	pPC_Library
HBA75_03905	19	0.000715538	2	pPC_Library
HBA75_03920	2	7.53198e-05	1	pPC_Library
HBA75_04000	1	3.76599e-05	1	pPC_Library
HBA75_04005	7	0.000263619	1	pPC_Library
HBA75_04045	5	0.000188299	1	pPC_Library
HBA75_04190	189	0.00711772	3	pPC_Library
HBA75_04365	396	0.0149133	3	pPC_Library
HBA75_04405	7	0.000263619	1	pPC_Library
HBA75_04550	3	0.00011298	1	pPC_Library
HBA75_04560	10	0.000376599	2	pPC_Library
HBA75_04605	48	0.00180767	2	pPC_Library
HBA75_04650	35	0.0013181	2	pPC_Library
HBA75_04690	3	0.00011298	1	pPC_Library
HBA75_04720	105	0.00395429	3	pPC_Library
HBA75_04790	163	0.00613856	3	pPC_Library
HBA75_04825	1	3.76599e-05	1	pPC_Library
HBA75_04830	1	3.76599e-05	1	pPC_Library
HBA75_05095	101	0.00380365	3	pPC_Library
HBA75_05155	13	0.000489578	2	pPC_Library
HBA75_05295	19	0.000715538	2	pPC_Library
HBA75_05345	26	0.000979157	2	pPC_Library
HBA75_05425	23	0.000866177	2	pPC_Library
HBA75_05440	86	0.00323875	2	pPC_Library
HBA75_05455	81	0.00305045	2	pPC_Library
HBA75_05620	2	7.53198e-05	1	pPC_Library
HBA75_05625	3	0.00011298	1	pPC_Library
HBA75_05680	1	3.76599e-05	1	pPC_Library
HBA75_05775	15	0.000564898	2	pPC_Library
HBA75_05850	6	0.000225959	1	pPC_Library
HBA75_05875	3	0.00011298	1	pPC_Library
HBA75_05955	30	0.0011298	2	pPC_Library
HBA75_06105	1283	0.0483176	4	pPC_Library
HBA75_06150	13	0.000489578	2	pPC_Library
HBA75_06160	2	7.53198e-05	1	pPC_Library
HBA75_06190	1	3.76599e-05	1	pPC_Library
HBA75_06195	1	3.76599e-05	1	pPC_Library
HBA75_06365	9	0.000338939	1	pPC_Library
HBA75_06425	1	3.76599e-05	1	pPC_Library
HBA75_06520	2	7.53198e-05	1	pPC_Library
HBA75_06635	87	0.00327641	2	pPC_Library
HBA75_06725	1	3.76599e-05	1	pPC_Library
HBA75_06735	2	7.53198e-05	1	pPC_Library
HBA75_06850	1	3.76599e-05	1	pPC_Library
HBA75_07255	10	0.000376599	2	pPC_Library
HBA75_07395	19	0.000715538	2	pPC_Library
HBA75_07865	9	0.000338939	1	pPC_Library
HBA75_08015	18	0.000677878	2	pPC_Library
HBA75_08235	80	0.00301279	2	pPC_Library
HBA75_08240	80	0.00301279	2	pPC_Library
HBA75_08245	80	0.00301279	2	pPC_Library
HBA75_08260	10	0.000376599	2	pPC_Library
HBA75_08275	4	0.00015064	1	pPC_Library
HBA75_08385	21	0.000790857	2	pPC_Library
HBA75_08565	123	0.00463216	3	pPC_Library
HBA75_08670	5	0.000188299	1	pPC_Library
HBA75_08705	1	3.76599e-05	1	pPC_Library
HBA75_08770	2	7.53198e-05	1	pPC_Library
HBA75_08815	103	0.00387897	3	pPC_Library
HBA75_08920	85	0.00320109	2	pPC_Library
HBA75_09015	6	0.000225959	1	pPC_Library
HBA75_09040	26	0.000979157	2	pPC_Library
HBA75_09045	26	0.000979157	2	pPC_Library
HBA75_09205	1	3.76599e-05	1	pPC_Library
HBA75_09375	53	0.00199597	2	pPC_Library
HBA75_09445	1	3.76599e-05	1	pPC_Library
HBA75_09450	28	0.00105448	2	pPC_Library
HBA75_09560	1	3.76599e-05	1	pPC_Library
HBA75_09595	4	0.00015064	1	pPC_Library
HBA75_09690	25	0.000941497	2	pPC_Library
HBA75_09855	1	3.76599e-05	1	pPC_Library
HBA75_09980	9	0.000338939	1	pPC_Library
HBA75_10045	8	0.000301279	1	pPC_Library
HBA75_10485	4	0.00015064	1	pPC_Library
HBA75_10630	1	3.76599e-05	1	pPC_Library
HBA75_10640	1	3.76599e-05	1	pPC_Library
HBA75_10660	3	0.00011298	1	pPC_Library
HBA75_10810	2	7.53198e-05	1	pPC_Library
HBA75_10870	13	0.000489578	2	pPC_Library
HBA75_11030	64	0.00241023	2	pPC_Library
HBA75_11115	15	0.000564898	2	pPC_Library
HBA75_11325	84	0.00316343	2	pPC_Library
HBA75_11430	2	7.53198e-05	1	pPC_Library
HBA75_11505	118	0.00444387	3	pPC_Library
HBA75_11680	2	7.53198e-05	1	pPC_Library
HBA75_11730	4	0.00015064	1	pPC_Library
HBA75_11855	2	7.53198e-05	1	pPC_Library
HBA75_11885	6	0.000225959	1	pPC_Library
HBA75_11970	4	0.00015064	1	pPC_Library
HBA75_12120	192	0.0072307	3	pPC_Library
HBA75_12125	769	0.0289604	3	pPC_Library
HBA75_12130	779	0.029337	3	pPC_Library
HBA75_12255	2	7.53198e-05	1	pPC_Library
HBA75_13235	2	7.53198e-05	1	pPC_Library
HBA75_13380	52	0.00195831	2	pPC_Library
HBA75_13385	1	3.76599e-05	1	pPC_Library
HBA75_13390	29	0.00109214	2	pPC_Library
HBA75_13630	39	0.00146874	2	pPC_Library
HBA75_13635	9	0.000338939	1	pPC_Library
HBA75_13695	3	0.00011298	1	pPC_Library
HBA75_13730	894	0.0336679	3	pPC_Library
HBA75_14045	52	0.00195831	2	pPC_Library
HBA75_14510	9	0.000338939	1	pPC_Library
HBA75_14605	1	3.76599e-05	1	pPC_Library
HBA75_14625	1	3.76599e-05	1	pPC_Library
HBA75_14680	4	0.00015064	1	pPC_Library
HBA75_14700	274	0.0103188	3	pPC_Library
HBA75_14755	99	0.00372833	2	pPC_Library
HBA75_14995	1	3.76599e-05	1	pPC_Library
HBA75_15005	4	0.00015064	1	pPC_Library
HBA75_15165	1	3.76599e-05	1	pPC_Library
HBA75_15240	3	0.00011298	1	pPC_Library
HBA75_15340	194	0.00730602	3	pPC_Library
HBA75_15560	6	0.000225959	1	pPC_Library
HBA75_15635	16	0.000602558	2	pPC_Library
HBA75_15655	36	0.00135576	2	pPC_Library
HBA75_15735	80	0.00301279	2	pPC_Library
HBA75_15740	6	0.000225959	1	pPC_Library
HBA75_15745	8	0.000301279	1	pPC_Library
HBA75_15920	1	3.76599e-05	1	pPC_Library
HBA75_15930	5	0.000188299	1	pPC_Library
HBA75_15965	117	0.00440621	3	pPC_Library
HBA75_16065	18	0.000677878	2	pPC_Library
HBA75_16200	13	0.000489578	2	pPC_Library
HBA75_16355	2	7.53198e-05	1	pPC_Library
HBA75_16385	25	0.000941497	2	pPC_Library
HBA75_16405	271	0.0102058	3	pPC_Library
HBA75_16415	12	0.000451919	2	pPC_Library
HBA75_16470	5	0.000188299	1	pPC_Library
HBA75_16495	40	0.0015064	2	pPC_Library
HBA75_16850	15	0.000564898	2	pPC_Library
HBA75_17015	10	0.000376599	2	pPC_Library
HBA75_17365	7	0.000263619	1	pPC_Library
HBA75_17380	96	0.00361535	2	pPC_Library
HBA75_17440	1	3.76599e-05	1	pPC_Library
HBA75_17490	1	3.76599e-05	1	pPC_Library
HBA75_17515	1	3.76599e-05	1	pPC_Library
HBA75_17565	3	0.00011298	1	pPC_Library
HBA75_17615	6	0.000225959	1	pPC_Library
HBA75_17620	2	7.53198e-05	1	pPC_Library
HBA75_17645	544	0.020487	3	pPC_Library
HBA75_17870	8	0.000301279	1	pPC_Library
HBA75_17980	5	0.000188299	1	pPC_Library
HBA75_18010	99	0.00372833	2	pPC_Library
HBA75_18065	3	0.00011298	1	pPC_Library
HBA75_18070	2	7.53198e-05	1	pPC_Library
HBA75_18180	111	0.00418025	3	pPC_Library
HBA75_18300	7	0.000263619	1	pPC_Library
HBA75_18355	103	0.00387897	3	pPC_Library
HBA75_18635	34	0.00128044	2	pPC_Library
HBA75_18655	5	0.000188299	1	pPC_Library
HBA75_18755	36	0.00135576	2	pPC_Library
HBA75_18825	27	0.00101682	2	pPC_Library
HBA75_18840	11	0.000414259	2	pPC_Library
HBA75_18850	1	3.76599e-05	1	pPC_Library
HBA75_18865	4	0.00015064	1	pPC_Library
HBA75_18890	17	0.000640218	2	pPC_Library
HBA75_18965	169	0.00636452	3	pPC_Library
HBA75_19040	1	3.76599e-05	1	pPC_Library
HBA75_19080	107	0.00402961	3	pPC_Library
HBA75_19085	36	0.00135576	2	pPC_Library
HBA75_19175	1	3.76599e-05	1	pPC_Library
HBA75_19180	1	3.76599e-05	1	pPC_Library
HBA75_19185	1	3.76599e-05	1	pPC_Library
HBA75_19190	1	3.76599e-05	1	pPC_Library
HBA75_19200	6	0.000225959	1	pPC_Library
HBA75_19210	4	0.00015064	1	pPC_Library
HBA75_19235	17	0.000640218	2	pPC_Library
HBA75_19290	1	3.76599e-05	1	pPC_Library
HBA75_19295	723	0.0272281	3	pPC_Library
HBA75_19355	1	3.76599e-05	1	pPC_Library
HBA75_19395	23	0.000866177	2	pPC_Library
HBA75_19430	6	0.000225959	1	pPC_Library
HBA75_19475	1	3.76599e-05	1	pPC_Library
HBA75_19495	1	3.76599e-05	1	pPC_Library
HBA75_19540	2	7.53198e-05	1	pPC_Library
HBA75_19610	7	0.000263619	1	pPC_Library
HBA75_19620	11	0.000414259	2	pPC_Library
HBA75_19625	3	0.00011298	1	pPC_Library
HBA75_19845	32	0.00120512	2	pPC_Library
HBA75_20030	2	7.53198e-05	1	pPC_Library
HBA75_20040	17	0.000640218	2	pPC_Library
HBA75_20125	1	3.76599e-05	1	pPC_Library
HBA75_20175	56	0.00210895	2	pPC_Library
HBA75_20215	17	0.000640218	2	pPC_Library
HBA75_20235	14	0.000527238	2	pPC_Library
HBA75_20395	15	0.000564898	2	pPC_Library
HBA75_20425	1	3.76599e-05	1	pPC_Library
HBA75_20500	5	0.000188299	1	pPC_Library
HBA75_20535	1	3.76599e-05	1	pPC_Library
HBA75_20615	1	3.76599e-05	1	pPC_Library
HBA75_20620	21	0.000790857	2	pPC_Library
HBA75_20685	24	0.000903837	2	pPC_Library
HBA75_20725	25	0.000941497	2	pPC_Library
HBA75_20740	26	0.000979157	2	pPC_Library
HBA75_20760	12	0.000451919	2	pPC_Library
HBA75_20975	1	3.76599e-05	1	pPC_Library
HBA75_20990	26	0.000979157	2	pPC_Library
HBA75_21060	2	7.53198e-05	1	pPC_Library
HBA75_21125	11	0.000414259	2	pPC_Library
HBA75_21205	763	0.0287345	3	pPC_Library
HBA75_21215	9	0.000338939	1	pPC_Library
HBA75_21275	44	0.00165703	2	pPC_Library
HBA75_21280	21	0.000790857	2	pPC_Library
HBA75_21300	1	3.76599e-05	1	pPC_Library
HBA75_21500	26	0.000979157	2	pPC_Library
HBA75_21705	8	0.000301279	1	pPC_Library
HBA75_21710	18	0.000677878	2	pPC_Library
HBA75_21795	1	3.76599e-05	1	pPC_Library
HBA75_21835	16	0.000602558	2	pPC_Library
HBA75_21870	11	0.000414259	2	pPC_Library
HBA75_21915	4	0.00015064	1	pPC_Library
HBA75_21990	1	3.76599e-05	1	pPC_Library
HBA75_22035	1	3.76599e-05	1	pPC_Library
HBA75_22050	28	0.00105448	2	pPC_Library
HBA75_22160	1	3.76599e-05	1	pPC_Library
HBA75_22430	1	3.76599e-05	1	pPC_Library
HBA75_22455	19	0.000715538	2	pPC_Library
HBA75_22720	7	0.000263619	1	pPC_Library
HBA75_22815	19	0.000715538	2	pPC_Library
HBA75_22855	1	3.76599e-05	1	pPC_Library
HBA75_22885	1	3.76599e-05	1	pPC_Library
HBA75_22900	5	0.000188299	1	pPC_Library
HBA75_22930	4	0.00015064	1	pPC_Library
HBA75_22945	217	0.00817219	3	pPC_Library
HBA75_22985	4	0.00015064	1	pPC_Library
HBA75_23055	1	3.76599e-05	1	pPC_Library
HBA75_23075	88	0.00331407	2	pPC_Library
HBA75_23085	481	0.0181144	3	pPC_Library
HBA75_23100	20	0.000753198	2	pPC_Library
HBA75_23320	176	0.00662814	3	pPC_Library
HBA75_23330	3	0.00011298	1	pPC_Library
HBA75_23425	594	0.02237	3	pPC_Library
HBA75_23510	2	7.53198e-05	1	pPC_Library
HBA75_23525	436	0.0164197	3	pPC_Library
HBA75_23535	89	0.00335173	2	pPC_Library
HBA75_23540	17	0.000640218	2	pPC_Library
HBA75_23545	37	0.00139342	2	pPC_Library
HBA75_23575	1	3.76599e-05	1	pPC_Library
HBA75_23625	84	0.00316343	2	pPC_Library
HBA75_23725	2	7.53198e-05	1	pPC_Library
HBA75_23730	1	3.76599e-05	1	pPC_Library
HBA75_23780	2	7.53198e-05	1	pPC_Library
HBA75_23815	3	0.00011298	1	pPC_Library
HBA75_23840	21	0.000790857	2	pPC_Library
HBA75_23885	8	0.000301279	1	pPC_Library
HBA75_23930	1	3.76599e-05	1	pPC_Library
HBA75_23965	6	0.000225959	1	pPC_Library
HBA75_23990	40	0.0015064	2	pPC_Library
HBA75_24040	2	7.53198e-05	1	pPC_Library
HBA75_24175	1	3.76599e-05	1	pPC_Library
HBA75_24320	1	3.76599e-05	1	pPC_Library
HBA75_24345	6	0.000225959	1	pPC_Library
HBA75_24385	3	0.00011298	1	pPC_Library
HBA75_24435	1	3.76599e-05	1	pPC_Library
HBA75_24445	13	0.000489578	2	pPC_Library
HBA75_24450	1	3.76599e-05	1	pPC_Library
HBA75_24455	4	0.00015064	1	pPC_Library
HBA75_24460	3	0.00011298	1	pPC_Library
HBA75_24670	5	0.000188299	1	pPC_Library
HBA75_24685	2	7.53198e-05	1	pPC_Library
HBA75_24750	1	3.76599e-05	1	pPC_Library
HBA75_24785	25	0.000941497	2	pPC_Library
HBA75_24805	203	0.00764495	3	pPC_Library
HBA75_24840	2	7.53198e-05	1	pPC_Library
HBA75_24925	15	0.000564898	2	pPC_Library
HBA75_24995	4	0.00015064	1	pPC_Library
HBA75_25140	3	0.00011298	1	pPC_Library
HBA75_25150	14	0.000527238	2	pPC_Library
HBA75_25320	4	0.00015064	1	pPC_Library
HBA75_25355	1	3.76599e-05	1	pPC_Library
HBA75_25375	1	3.76599e-05	1	pPC_Library
HBA75_25400	294	0.011072	3	pPC_Library
HBA75_25415	50	0.00188299	2	pPC_Library
HBA75_25440	414	0.0155912	3	pPC_Library
HBA75_25475	98	0.00369067	2	pPC_Library
HBA75_25485	17	0.000640218	2	pPC_Library
HBA75_25520	1	3.76599e-05	1	pPC_Library
HBA75_25525	139	0.00523472	3	pPC_Library
HBA75_25540	56	0.00210895	2	pPC_Library
HBA75_25590	198	0.00745666	3	pPC_Library
HBA75_25680	14	0.000527238	2	pPC_Library
HBA75_25755	2	7.53198e-05	1	pPC_Library
HBA75_25855	29	0.00109214	2	pPC_Library
HBA75_25870	5	0.000188299	1	pPC_Library
HBA75_26060	5	0.000188299	1	pPC_Library
HBA75_26070	160	0.00602558	3	pPC_Library
HBA75_26120	9	0.000338939	1	pPC_Library
HBA75_26285	6	0.000225959	1	pPC_Library
HBA75_26325	3	0.00011298	1	pPC_Library
HBA75_26335	88	0.00331407	2	pPC_Library
HBA75_26345	3	0.00011298	1	pPC_Library
HBA75_26390	71	0.00267385	2	pPC_Library
HBA75_26395	5	0.000188299	1	pPC_Library
HBA75_26415	5	0.000188299	1	pPC_Library
HBA75_26440	1	3.76599e-05	1	pPC_Library
HBA75_26675	1	3.76599e-05	1	pPC_Library
HBA75_26720	9	0.000338939	1	pPC_Library
HBA75_26775	6	0.000225959	1	pPC_Library
HBA75_26870	234	0.00881241	3	pPC_Library
HBA75_26960	47	0.00177001	2	pPC_Library
HBA75_26985	35	0.0013181	2	pPC_Library
HBA75_27005	57	0.00214661	2	pPC_Library
HBA75_27035	57	0.00214661	2	pPC_Library
HBA75_27070	4	0.00015064	1	pPC_Library
HBA75_27105	31	0.00116746	2	pPC_Library
HBA75_27115	1	3.76599e-05	1	pPC_Library
HBA75_27120	39	0.00146874	2	pPC_Library
HBA75_27190	16	0.000602558	2	pPC_Library
HBA75_27230	3	0.00011298	1	pPC_Library
HBA75_27275	1	3.76599e-05	1	pPC_Library
HBA75_27280	1	3.76599e-05	1	pPC_Library
HBA75_27330	67	0.00252321	2	pPC_Library
HBA75_27520	81	0.00305045	2	pPC_Library
HBA75_27530	33	0.00124278	2	pPC_Library
HBA75_27555	12	0.000451919	2	pPC_Library
HBA75_27605	2160	0.0813453	4	pPC_Library
HBA75_27625	2	7.53198e-05	1	pPC_Library
HBA75_27720	2	7.53198e-05	1	pPC_Library
HBA75_27735	1	3.76599e-05	1	pPC_Library
HBA75_27740	33	0.00124278	2	pPC_Library
HBA75_27745	66	0.00248555	2	pPC_Library
HBA75_27790	758	0.0285462	3	pPC_Library
HBA75_27815	13	0.000489578	2	pPC_Library
HBA75_27855	11	0.000414259	2	pPC_Library
HBA75_27915	21	0.000790857	2	pPC_Library
HBA75_27930	7	0.000263619	1	pPC_Library
HBA75_27975	9	0.000338939	1	pPC_Library
HBA75_28090	13	0.000489578	2	pPC_Library
HBA75_28175	56	0.00210895	2	pPC_Library
HBA75_28210	4	0.00015064	1	pPC_Library
HBA75_28230	45	0.00169469	2	pPC_Library
HBA75_28255	3	0.00011298	1	pPC_Library
HBA75_28270	64	0.00241023	2	pPC_Library
HBA75_28485	2	7.53198e-05	1	pPC_Library
HBA75_28495	9	0.000338939	1	pPC_Library
HBA75_28515	3	0.00011298	1	pPC_Library
HBA75_28550	6	0.000225959	1	pPC_Library
HBA75_28595	43	0.00161937	2	pPC_Library
HBA75_28660	6	0.000225959	1	pPC_Library
HBA75_28735	1	3.76599e-05	1	pPC_Library
HBA75_28785	1	3.76599e-05	1	pPC_Library
HBA75_28900	179	0.00674112	3	pPC_Library
HBA75_28945	3	0.00011298	1	pPC_Library
HBA75_29085	5	0.000188299	1	pPC_Library
HBA75_29365	5	0.000188299	1	pPC_Library
HBA75_29395	23	0.000866177	2	pPC_Library
HBA75_29430	6	0.000225959	1	pPC_Library
HBA75_29475	263	0.00990455	3	pPC_Library
HBA75_29725	215	0.00809687	3	pPC_Library
HBA75_30055	10	0.000376599	2	pPC_Library
HBA75_30195	1	3.76599e-05	1	pPC_Library
HBA75_30285	17	0.000640218	2	pPC_Library
HBA75_30400	16	0.000602558	2	pPC_Library
HBA75_30410	1	3.76599e-05	1	pPC_Library
HBA75_30415	35	0.0013181	2	pPC_Library
HBA75_30450	606	0.0228219	3	pPC_Library
HBA75_30470	2	7.53198e-05	1	pPC_Library
HBA75_30485	5	0.000188299	1	pPC_Library
HBA75_30495	1	3.76599e-05	1	pPC_Library
HBA75_30505	5	0.000188299	1	pPC_Library
HBA75_30515	1	3.76599e-05	1	pPC_Library
HBA75_30635	3323	0.125144	4	pPC_Library
HBA75_30675	94	0.00354003	2	pPC_Library
HBA75_30685	120	0.00451919	3	pPC_Library
HBA75_30690	9	0.000338939	1	pPC_Library
HBA75_30695	1	3.76599e-05	1	pPC_Library
HBA75_30720	279	0.0105071	3	pPC_Library
HBA75_30930	1	3.76599e-05	1	pPC_Library
HBA75_30985	89	0.00335173	2	pPC_Library
HBA75_31050	1	3.76599e-05	1	pPC_Library
HBA75_00030	1	4.16268e-05	1	pPN_Library
HBA75_00145	11	0.000457895	2	pPN_Library
HBA75_00155	3	0.00012488	1	pPN_Library
HBA75_00165	2	8.32536e-05	1	pPN_Library
HBA75_00185	21	0.000874163	2	pPN_Library
HBA75_00285	1	4.16268e-05	1	pPN_Library
HBA75_00355	1	4.16268e-05	1	pPN_Library
HBA75_00375	7	0.000291388	1	pPN_Library
HBA75_00400	445	0.0185239	3	pPN_Library
HBA75_00450	11	0.000457895	2	pPN_Library
HBA75_00460	19	0.000790909	2	pPN_Library
HBA75_00465	27	0.00112392	2	pPN_Library
HBA75_00695	2	8.32536e-05	1	pPN_Library
HBA75_00715	33	0.00137368	2	pPN_Library
HBA75_00720	53	0.00220622	2	pPN_Library
HBA75_00725	597	0.0248512	3	pPN_Library
HBA75_00735	1030	0.0428756	4	pPN_Library
HBA75_00740	31	0.00129043	2	pPN_Library
HBA75_00745	1509	0.0628148	4	pPN_Library
HBA75_00795	162	0.00674354	3	pPN_Library
HBA75_00810	10	0.000416268	2	pPN_Library
HBA75_00835	38	0.00158182	2	pPN_Library
HBA75_00860	25	0.00104067	2	pPN_Library
HBA75_00865	567	0.0236024	3	pPN_Library
HBA75_00915	25	0.00104067	2	pPN_Library
HBA75_01030	81	0.00337177	2	pPN_Library
HBA75_01050	524	0.0218124	3	pPN_Library
HBA75_01115	1	4.16268e-05	1	pPN_Library
HBA75_01120	1	4.16268e-05	1	pPN_Library
HBA75_01145	1	4.16268e-05	1	pPN_Library
HBA75_01150	42	0.00174833	2	pPN_Library
HBA75_01185	113	0.00470383	3	pPN_Library
HBA75_01190	113	0.00470383	3	pPN_Library
HBA75_01225	99	0.00412105	2	pPN_Library
HBA75_01255	34	0.00141531	2	pPN_Library
HBA75_01440	2	8.32536e-05	1	pPN_Library
HBA75_01630	2	8.32536e-05	1	pPN_Library
HBA75_01860	35	0.00145694	2	pPN_Library
HBA75_01870	347	0.0144445	3	pPN_Library
HBA75_01875	1	4.16268e-05	1	pPN_Library
HBA75_01890	20	0.000832536	2	pPN_Library
HBA75_01930	22	0.000915789	2	pPN_Library
HBA75_01935	85	0.00353828	2	pPN_Library
HBA75_01995	98	0.00407943	2	pPN_Library
HBA75_02025	1	4.16268e-05	1	pPN_Library
HBA75_02035	3	0.00012488	1	pPN_Library
HBA75_02065	3	0.00012488	1	pPN_Library
HBA75_02070	15	0.000624402	2	pPN_Library
HBA75_02165	10	0.000416268	2	pPN_Library
HBA75_02235	177	0.00736794	3	pPN_Library
HBA75_02375	91	0.00378804	2	pPN_Library
HBA75_02380	10	0.000416268	2	pPN_Library
HBA75_02545	511	0.0212713	3	pPN_Library
HBA75_02600	26	0.0010823	2	pPN_Library
HBA75_02620	1018	0.0423761	4	pPN_Library
HBA75_02655	6	0.000249761	1	pPN_Library
HBA75_02665	251	0.0104483	3	pPN_Library
HBA75_02710	57	0.00237273	2	pPN_Library
HBA75_02715	3	0.00012488	1	pPN_Library
HBA75_02730	2	8.32536e-05	1	pPN_Library
HBA75_02735	8	0.000333014	1	pPN_Library
HBA75_02740	5	0.000208134	1	pPN_Library
HBA75_02780	34	0.00141531	2	pPN_Library
HBA75_02835	4	0.000166507	1	pPN_Library
HBA75_02840	173	0.00720143	3	pPN_Library
HBA75_02890	457	0.0190234	3	pPN_Library
HBA75_03010	8	0.000333014	1	pPN_Library
HBA75_03035	151	0.00628565	3	pPN_Library
HBA75_03040	30	0.0012488	2	pPN_Library
HBA75_03095	31	0.00129043	2	pPN_Library
HBA75_03175	4	0.000166507	1	pPN_Library
HBA75_03185	7	0.000291388	1	pPN_Library
HBA75_03305	33	0.00137368	2	pPN_Library
HBA75_03335	47	0.00195646	2	pPN_Library
HBA75_03420	46	0.00191483	2	pPN_Library
HBA75_03425	43	0.00178995	2	pPN_Library
HBA75_03440	202	0.00840861	3	pPN_Library
HBA75_03595	11	0.000457895	2	pPN_Library
HBA75_03605	7	0.000291388	1	pPN_Library
HBA75_03615	97	0.0040378	2	pPN_Library
HBA75_03670	1588	0.0661033	4	pPN_Library
HBA75_03685	1	4.16268e-05	1	pPN_Library
HBA75_03710	20	0.000832536	2	pPN_Library
HBA75_03780	21	0.000874163	2	pPN_Library
HBA75_03795	17	0.000707655	2	pPN_Library
HBA75_03805	106	0.00441244	3	pPN_Library
HBA75_03845	1	4.16268e-05	1	pPN_Library
HBA75_03865	38	0.00158182	2	pPN_Library
HBA75_03905	19	0.000790909	2	pPN_Library
HBA75_03920	41	0.0017067	2	pPN_Library
HBA75_03925	9	0.000374641	1	pPN_Library
HBA75_03960	3	0.00012488	1	pPN_Library
HBA75_04000	99	0.00412105	2	pPN_Library
HBA75_04020	2	8.32536e-05	1	pPN_Library
HBA75_04045	300	0.012488	3	pPN_Library
HBA75_04160	2	8.32536e-05	1	pPN_Library
HBA75_04190	142	0.005911	3	pPN_Library
HBA75_04205	2	8.32536e-05	1	pPN_Library
HBA75_04320	14	0.000582775	2	pPN_Library
HBA75_04360	13	0.000541148	2	pPN_Library
HBA75_04365	781	0.0325105	3	pPN_Library
HBA75_04370	11	0.000457895	2	pPN_Library
HBA75_04375	45	0.00187321	2	pPN_Library
HBA75_04390	3483	0.144986	4	pPN_Library
HBA75_04395	31	0.00129043	2	pPN_Library
HBA75_04405	63	0.00262249	2	pPN_Library
HBA75_04515	8	0.000333014	1	pPN_Library
HBA75_04545	3	0.00012488	1	pPN_Library
HBA75_04550	1	4.16268e-05	1	pPN_Library
HBA75_04560	717	0.0298464	3	pPN_Library
HBA75_04595	11	0.000457895	2	pPN_Library
HBA75_04605	17	0.000707655	2	pPN_Library
HBA75_04620	5	0.000208134	1	pPN_Library
HBA75_04630	2	8.32536e-05	1	pPN_Library
HBA75_04650	102	0.00424593	3	pPN_Library
HBA75_04655	4	0.000166507	1	pPN_Library
HBA75_04690	2	8.32536e-05	1	pPN_Library
HBA75_04720	122	0.00507847	3	pPN_Library
HBA75_04760	10	0.000416268	2	pPN_Library
HBA75_04790	48	0.00199809	2	pPN_Library
HBA75_04825	110	0.00457895	3	pPN_Library
HBA75_04830	110	0.00457895	3	pPN_Library
HBA75_04985	5	0.000208134	1	pPN_Library
HBA75_05010	37	0.00154019	2	pPN_Library
HBA75_05055	9	0.000374641	1	pPN_Library
HBA75_05095	67	0.002789	2	pPN_Library
HBA75_05125	9	0.000374641	1	pPN_Library
HBA75_05150	6	0.000249761	1	pPN_Library
HBA75_05155	3	0.00012488	1	pPN_Library
HBA75_05200	14	0.000582775	2	pPN_Library
HBA75_05290	1	4.16268e-05	1	pPN_Library
HBA75_05295	44	0.00183158	2	pPN_Library
HBA75_05315	8	0.000333014	1	pPN_Library
HBA75_05325	35	0.00145694	2	pPN_Library
HBA75_05345	14	0.000582775	2	pPN_Library
HBA75_05390	41	0.0017067	2	pPN_Library
HBA75_05425	2	8.32536e-05	1	pPN_Library
HBA75_05430	36	0.00149856	2	pPN_Library
HBA75_05440	138	0.0057445	3	pPN_Library
HBA75_05455	138	0.0057445	3	pPN_Library
HBA75_05530	15	0.000624402	2	pPN_Library
HBA75_05540	3	0.00012488	1	pPN_Library
HBA75_05560	11	0.000457895	2	pPN_Library
HBA75_05570	3	0.00012488	1	pPN_Library
HBA75_05620	16	0.000666029	2	pPN_Library
HBA75_05625	7	0.000291388	1	pPN_Library
HBA75_05680	16	0.000666029	2	pPN_Library
HBA75_05685	15	0.000624402	2	pPN_Library
HBA75_05690	1	4.16268e-05	1	pPN_Library
HBA75_05775	86	0.0035799	2	pPN_Library
HBA75_05850	45	0.00187321	2	pPN_Library
HBA75_05875	1	4.16268e-05	1	pPN_Library
HBA75_05905	9	0.000374641	1	pPN_Library
HBA75_05955	15	0.000624402	2	pPN_Library
HBA75_06045	1	4.16268e-05	1	pPN_Library
HBA75_06085	16	0.000666029	2	pPN_Library
HBA75_06105	1758	0.0731799	4	pPN_Library
HBA75_06110	2	8.32536e-05	1	pPN_Library
HBA75_06170	2	8.32536e-05	1	pPN_Library
HBA75_06175	1	4.16268e-05	1	pPN_Library
HBA75_06180	32	0.00133206	2	pPN_Library
HBA75_06195	67	0.002789	2	pPN_Library
HBA75_06205	5	0.000208134	1	pPN_Library
HBA75_06210	17	0.000707655	2	pPN_Library
HBA75_06320	2	8.32536e-05	1	pPN_Library
HBA75_06365	84	0.00349665	2	pPN_Library
HBA75_06405	19	0.000790909	2	pPN_Library
HBA75_06415	2	8.32536e-05	1	pPN_Library
HBA75_06425	40	0.00166507	2	pPN_Library
HBA75_06470	1	4.16268e-05	1	pPN_Library
HBA75_06520	18	0.000749282	2	pPN_Library
HBA75_06595	21	0.000874163	2	pPN_Library
HBA75_06635	157	0.00653541	3	pPN_Library
HBA75_06720	3	0.00012488	1	pPN_Library
HBA75_06725	2	8.32536e-05	1	pPN_Library
HBA75_06785	4	0.000166507	1	pPN_Library
HBA75_06885	5	0.000208134	1	pPN_Library
HBA75_06910	2	8.32536e-05	1	pPN_Library
HBA75_07070	4	0.000166507	1	pPN_Library
HBA75_07140	12	0.000499522	2	pPN_Library
HBA75_07220	1	4.16268e-05	1	pPN_Library
HBA75_07255	16	0.000666029	2	pPN_Library
HBA75_07395	102	0.00424593	3	pPN_Library
HBA75_07450	2	8.32536e-05	1	pPN_Library
HBA75_07470	2	8.32536e-05	1	pPN_Library
HBA75_07475	1	4.16268e-05	1	pPN_Library
HBA75_07560	22	0.000915789	2	pPN_Library
HBA75_07565	1	4.16268e-05	1	pPN_Library
HBA75_07570	1	4.16268e-05	1	pPN_Library
HBA75_07665	142	0.005911	3	pPN_Library
HBA75_07700	18	0.000749282	2	pPN_Library
HBA75_07710	17	0.000707655	2	pPN_Library
HBA75_07810	1	4.16268e-05	1	pPN_Library
HBA75_07815	37	0.00154019	2	pPN_Library
HBA75_07830	1	4.16268e-05	1	pPN_Library
HBA75_07855	1	4.16268e-05	1	pPN_Library
HBA75_07865	5	0.000208134	1	pPN_Library
HBA75_08015	16	0.000666029	2	pPN_Library
HBA75_08075	8	0.000333014	1	pPN_Library
HBA75_08205	10	0.000416268	2	pPN_Library
HBA75_08225	1	4.16268e-05	1	pPN_Library
HBA75_08235	46	0.00191483	2	pPN_Library
HBA75_08240	46	0.00191483	2	pPN_Library
HBA75_08245	46	0.00191483	2	pPN_Library
HBA75_08275	9	0.000374641	1	pPN_Library
HBA75_08385	56	0.0023311	2	pPN_Library
HBA75_08550	14	0.000582775	2	pPN_Library
HBA75_08565	14	0.000582775	2	pPN_Library
HBA75_08680	144	0.00599426	3	pPN_Library
HBA75_08705	301	0.0125297	3	pPN_Library
HBA75_08720	9	0.000374641	1	pPN_Library
HBA75_08730	6	0.000249761	1	pPN_Library
HBA75_08740	17	0.000707655	2	pPN_Library
HBA75_08770	236	0.00982392	3	pPN_Library
HBA75_08815	116	0.00482871	3	pPN_Library
HBA75_08880	9	0.000374641	1	pPN_Library
HBA75_08920	22	0.000915789	2	pPN_Library
HBA75_08980	4	0.000166507	1	pPN_Library
HBA75_09010	5	0.000208134	1	pPN_Library
HBA75_09015	2	8.32536e-05	1	pPN_Library
HBA75_09030	25	0.00104067	2	pPN_Library
HBA75_09040	1	4.16268e-05	1	pPN_Library
HBA75_09045	1	4.16268e-05	1	pPN_Library
HBA75_09065	4	0.000166507	1	pPN_Library
HBA75_09075	6	0.000249761	1	pPN_Library
HBA75_09320	96	0.00399617	2	pPN_Library
HBA75_09375	81	0.00337177	2	pPN_Library
HBA75_09445	15	0.000624402	2	pPN_Library
HBA75_09450	40	0.00166507	2	pPN_Library
HBA75_09465	9	0.000374641	1	pPN_Library
HBA75_09560	17	0.000707655	2	pPN_Library
HBA75_09595	5	0.000208134	1	pPN_Library
HBA75_09690	10	0.000416268	2	pPN_Library
HBA75_09855	46	0.00191483	2	pPN_Library
HBA75_09945	236	0.00982392	3	pPN_Library
HBA75_09960	1	4.16268e-05	1	pPN_Library
HBA75_09980	6	0.000249761	1	pPN_Library
HBA75_10045	7	0.000291388	1	pPN_Library
HBA75_10215	5	0.000208134	1	pPN_Library
HBA75_10385	2	8.32536e-05	1	pPN_Library
HBA75_10475	2	8.32536e-05	1	pPN_Library
HBA75_10485	21	0.000874163	2	pPN_Library
HBA75_10560	18	0.000749282	2	pPN_Library
HBA75_10630	1	4.16268e-05	1	pPN_Library
HBA75_10660	1	4.16268e-05	1	pPN_Library
HBA75_10760	17	0.000707655	2	pPN_Library
HBA75_11030	3	0.00012488	1	pPN_Library
HBA75_11115	14	0.000582775	2	pPN_Library
HBA75_11125	3	0.00012488	1	pPN_Library
HBA75_11300	1	4.16268e-05	1	pPN_Library
HBA75_11325	59	0.00245598	2	pPN_Library
HBA75_11430	2	8.32536e-05	1	pPN_Library
HBA75_11505	89	0.00370478	2	pPN_Library
HBA75_11510	4	0.000166507	1	pPN_Library
HBA75_11525	3	0.00012488	1	pPN_Library
HBA75_11730	9	0.000374641	1	pPN_Library
HBA75_11810	21	0.000874163	2	pPN_Library
HBA75_11825	8	0.000333014	1	pPN_Library
HBA75_11855	41	0.0017067	2	pPN_Library
HBA75_11885	284	0.011822	3	pPN_Library
HBA75_11960	2	8.32536e-05	1	pPN_Library
HBA75_11965	1	4.16268e-05	1	pPN_Library
HBA75_11970	6	0.000249761	1	pPN_Library
HBA75_12045	36	0.00149856	2	pPN_Library
HBA75_12120	33	0.00137368	2	pPN_Library
HBA75_12125	577	0.0240187	3	pPN_Library
HBA75_12130	582	0.0242268	3	pPN_Library
HBA75_12255	91	0.00378804	2	pPN_Library
HBA75_12305	4	0.000166507	1	pPN_Library
HBA75_12685	30	0.0012488	2	pPN_Library
HBA75_12990	3	0.00012488	1	pPN_Library
HBA75_13115	20	0.000832536	2	pPN_Library
HBA75_13350	1	4.16268e-05	1	pPN_Library
HBA75_13380	78	0.00324689	2	pPN_Library
HBA75_13385	9	0.000374641	1	pPN_Library
HBA75_13405	6	0.000249761	1	pPN_Library
HBA75_13495	2	8.32536e-05	1	pPN_Library
HBA75_13625	5	0.000208134	1	pPN_Library
HBA75_13630	368	0.0153187	3	pPN_Library
HBA75_13635	13	0.000541148	2	pPN_Library
HBA75_13700	11	0.000457895	2	pPN_Library
HBA75_13730	311	0.0129459	3	pPN_Library
HBA75_13840	5	0.000208134	1	pPN_Library
HBA75_13960	1	4.16268e-05	1	pPN_Library
HBA75_14030	332	0.0138201	3	pPN_Library
HBA75_14045	1	4.16268e-05	1	pPN_Library
HBA75_14070	7	0.000291388	1	pPN_Library
HBA75_14510	10	0.000416268	2	pPN_Library
HBA75_14515	54	0.00224785	2	pPN_Library
HBA75_14575	36	0.00149856	2	pPN_Library
HBA75_14610	5	0.000208134	1	pPN_Library
HBA75_14620	5	0.000208134	1	pPN_Library
HBA75_14625	35	0.00145694	2	pPN_Library
HBA75_14700	65	0.00270574	2	pPN_Library
HBA75_14745	1	4.16268e-05	1	pPN_Library
HBA75_14755	262	0.0109062	3	pPN_Library
HBA75_14835	32	0.00133206	2	pPN_Library
HBA75_14995	10	0.000416268	2	pPN_Library
HBA75_15110	1	4.16268e-05	1	pPN_Library
HBA75_15150	5	0.000208134	1	pPN_Library
HBA75_15165	2	8.32536e-05	1	pPN_Library
HBA75_15240	54	0.00224785	2	pPN_Library
HBA75_15340	441	0.0183574	3	pPN_Library
HBA75_15380	1	4.16268e-05	1	pPN_Library
HBA75_15390	29	0.00120718	2	pPN_Library
HBA75_15395	1	4.16268e-05	1	pPN_Library
HBA75_15405	5	0.000208134	1	pPN_Library
HBA75_15465	24	0.000999043	2	pPN_Library
HBA75_15560	4	0.000166507	1	pPN_Library
HBA75_15585	5	0.000208134	1	pPN_Library
HBA75_15625	1	4.16268e-05	1	pPN_Library
HBA75_15635	31	0.00129043	2	pPN_Library
HBA75_15655	4	0.000166507	1	pPN_Library
HBA75_15735	3	0.00012488	1	pPN_Library
HBA75_15740	134	0.00557799	3	pPN_Library
HBA75_15745	638	0.0265579	3	pPN_Library
HBA75_15790	1	4.16268e-05	1	pPN_Library
HBA75_15810	25	0.00104067	2	pPN_Library
HBA75_15930	1	4.16268e-05	1	pPN_Library
HBA75_15965	77	0.00320526	2	pPN_Library
HBA75_16065	16	0.000666029	2	pPN_Library
HBA75_16110	1	4.16268e-05	1	pPN_Library
HBA75_16145	25	0.00104067	2	pPN_Library
HBA75_16200	74	0.00308038	2	pPN_Library
HBA75_16270	16	0.000666029	2	pPN_Library
HBA75_16325	1	4.16268e-05	1	pPN_Library
HBA75_16355	228	0.00949091	3	pPN_Library
HBA75_16385	24	0.000999043	2	pPN_Library
HBA75_16395	11	0.000457895	2	pPN_Library
HBA75_16405	230	0.00957416	3	pPN_Library
HBA75_16415	150	0.00624402	3	pPN_Library
HBA75_16465	21	0.000874163	2	pPN_Library
HBA75_16470	10	0.000416268	2	pPN_Library
HBA75_16755	64	0.00266411	2	pPN_Library
HBA75_16850	20	0.000832536	2	pPN_Library
HBA75_16875	37	0.00154019	2	pPN_Library
HBA75_16885	37	0.00154019	2	pPN_Library
HBA75_16995	5	0.000208134	1	pPN_Library
HBA75_17015	3	0.00012488	1	pPN_Library
HBA75_17365	3	0.00012488	1	pPN_Library
HBA75_17380	48	0.00199809	2	pPN_Library
HBA75_17440	3	0.00012488	1	pPN_Library
HBA75_17515	38	0.00158182	2	pPN_Library
HBA75_17565	20	0.000832536	2	pPN_Library
HBA75_17615	9	0.000374641	1	pPN_Library
HBA75_17620	14	0.000582775	2	pPN_Library
HBA75_17645	333	0.0138617	3	pPN_Library
HBA75_17670	17	0.000707655	2	pPN_Library
HBA75_17690	18	0.000749282	2	pPN_Library
HBA75_17810	5	0.000208134	1	pPN_Library
HBA75_17830	13	0.000541148	2	pPN_Library
HBA75_17870	3	0.00012488	1	pPN_Library
HBA75_17970	9	0.000374641	1	pPN_Library
HBA75_17980	121	0.00503684	3	pPN_Library
HBA75_17990	130	0.00541148	3	pPN_Library
HBA75_18010	63	0.00262249	2	pPN_Library
HBA75_18020	334	0.0139033	3	pPN_Library
HBA75_18065	35	0.00145694	2	pPN_Library
HBA75_18165	16	0.000666029	2	pPN_Library
HBA75_18180	59	0.00245598	2	pPN_Library
HBA75_18215	1	4.16268e-05	1	pPN_Library
HBA75_18300	3	0.00012488	1	pPN_Library
HBA75_18340	3	0.00012488	1	pPN_Library
HBA75_18350	8	0.000333014	1	pPN_Library
HBA75_18355	6	0.000249761	1	pPN_Library
HBA75_18385	42	0.00174833	2	pPN_Library
HBA75_18390	11	0.000457895	2	pPN_Library
HBA75_18445	30	0.0012488	2	pPN_Library
HBA75_18450	7	0.000291388	1	pPN_Library
HBA75_18480	2	8.32536e-05	1	pPN_Library
HBA75_18590	6	0.000249761	1	pPN_Library
HBA75_18635	13	0.000541148	2	pPN_Library
HBA75_18655	109	0.00453732	3	pPN_Library
HBA75_18710	19	0.000790909	2	pPN_Library
HBA75_18755	21	0.000874163	2	pPN_Library
HBA75_18765	1	4.16268e-05	1	pPN_Library
HBA75_18770	74	0.00308038	2	pPN_Library
HBA75_18825	81	0.00337177	2	pPN_Library
HBA75_18840	5	0.000208134	1	pPN_Library
HBA75_18845	3	0.00012488	1	pPN_Library
HBA75_18850	3	0.00012488	1	pPN_Library
HBA75_18865	19	0.000790909	2	pPN_Library
HBA75_18875	1	4.16268e-05	1	pPN_Library
HBA75_18890	29	0.00120718	2	pPN_Library
HBA75_18920	16	0.000666029	2	pPN_Library
HBA75_18925	29	0.00120718	2	pPN_Library
HBA75_18965	130	0.00541148	3	pPN_Library
HBA75_18985	4	0.000166507	1	pPN_Library
HBA75_18990	2	8.32536e-05	1	pPN_Library
HBA75_19040	49	0.00203971	2	pPN_Library
HBA75_19080	50	0.00208134	2	pPN_Library
HBA75_19085	32	0.00133206	2	pPN_Library
HBA75_19090	2	8.32536e-05	1	pPN_Library
HBA75_19105	3	0.00012488	1	pPN_Library
HBA75_19160	39	0.00162344	2	pPN_Library
HBA75_19165	28	0.00116555	2	pPN_Library
HBA75_19175	434	0.018066	3	pPN_Library
HBA75_19180	18	0.000749282	2	pPN_Library
HBA75_19185	4	0.000166507	1	pPN_Library
HBA75_19195	6	0.000249761	1	pPN_Library
HBA75_19200	8	0.000333014	1	pPN_Library
HBA75_19210	29	0.00120718	2	pPN_Library
HBA75_19235	45	0.00187321	2	pPN_Library
HBA75_19290	21	0.000874163	2	pPN_Library
HBA75_19295	556	0.0231445	3	pPN_Library
HBA75_19385	103	0.00428756	3	pPN_Library
HBA75_19390	1	4.16268e-05	1	pPN_Library
HBA75_19395	386	0.0160679	3	pPN_Library
HBA75_19460	42	0.00174833	2	pPN_Library
HBA75_19495	17	0.000707655	2	pPN_Library
HBA75_19540	75	0.00312201	2	pPN_Library
HBA75_19610	7	0.000291388	1	pPN_Library
HBA75_19620	3	0.00012488	1	pPN_Library
HBA75_19625	271	0.0112809	3	pPN_Library
HBA75_19670	6	0.000249761	1	pPN_Library
HBA75_19845	7	0.000291388	1	pPN_Library
HBA75_19930	3	0.00012488	1	pPN_Library
HBA75_20030	34	0.00141531	2	pPN_Library
HBA75_20035	9	0.000374641	1	pPN_Library
HBA75_20040	37	0.00154019	2	pPN_Library
HBA75_20055	1	4.16268e-05	1	pPN_Library
HBA75_20060	2	8.32536e-05	1	pPN_Library
HBA75_20120	5	0.000208134	1	pPN_Library
HBA75_20175	3	0.00012488	1	pPN_Library
HBA75_20185	865	0.0360072	3	pPN_Library
HBA75_20190	47	0.00195646	2	pPN_Library
HBA75_20195	1	4.16268e-05	1	pPN_Library
HBA75_20215	1	4.16268e-05	1	pPN_Library
HBA75_20235	133	0.00553636	3	pPN_Library
HBA75_20240	1	4.16268e-05	1	pPN_Library
HBA75_20245	2	8.32536e-05	1	pPN_Library
HBA75_20250	19	0.000790909	2	pPN_Library
HBA75_20255	13	0.000541148	2	pPN_Library
HBA75_20370	23	0.000957416	2	pPN_Library
HBA75_20390	15	0.000624402	2	pPN_Library
HBA75_20455	38	0.00158182	2	pPN_Library
HBA75_20500	599	0.0249344	3	pPN_Library
HBA75_20535	8	0.000333014	1	pPN_Library
HBA75_20575	7	0.000291388	1	pPN_Library
HBA75_20585	16	0.000666029	2	pPN_Library
HBA75_20615	71	0.0029555	2	pPN_Library
HBA75_20620	50	0.00208134	2	pPN_Library
HBA75_20685	57	0.00237273	2	pPN_Library
HBA75_20725	6	0.000249761	1	pPN_Library
HBA75_20740	6	0.000249761	1	pPN_Library
HBA75_20750	2	8.32536e-05	1	pPN_Library
HBA75_20760	3	0.00012488	1	pPN_Library
HBA75_20820	4	0.000166507	1	pPN_Library
HBA75_20835	29	0.00120718	2	pPN_Library
HBA75_20855	22	0.000915789	2	pPN_Library
HBA75_20985	4	0.000166507	1	pPN_Library
HBA75_20990	1	4.16268e-05	1	pPN_Library
HBA75_21060	18	0.000749282	2	pPN_Library
HBA75_21065	20	0.000832536	2	pPN_Library
HBA75_21125	34	0.00141531	2	pPN_Library
HBA75_21165	248	0.0103234	3	pPN_Library
HBA75_21205	177	0.00736794	3	pPN_Library
HBA75_21215	6	0.000249761	1	pPN_Library
HBA75_21235	27	0.00112392	2	pPN_Library
HBA75_21275	15	0.000624402	2	pPN_Library
HBA75_21280	10	0.000416268	2	pPN_Library
HBA75_21295	9	0.000374641	1	pPN_Library
HBA75_21300	2	8.32536e-05	1	pPN_Library
HBA75_21365	30	0.0012488	2	pPN_Library
HBA75_21400	6	0.000249761	1	pPN_Library
HBA75_21440	10	0.000416268	2	pPN_Library
HBA75_21455	12	0.000499522	2	pPN_Library
HBA75_21500	43	0.00178995	2	pPN_Library
HBA75_21610	1	4.16268e-05	1	pPN_Library
HBA75_21690	3	0.00012488	1	pPN_Library
HBA75_21705	12	0.000499522	2	pPN_Library
HBA75_21710	6	0.000249761	1	pPN_Library
HBA75_21835	3	0.00012488	1	pPN_Library
HBA75_21870	11	0.000457895	2	pPN_Library
HBA75_21915	26	0.0010823	2	pPN_Library
HBA75_21940	1	4.16268e-05	1	pPN_Library
HBA75_21990	3	0.00012488	1	pPN_Library
HBA75_22000	20	0.000832536	2	pPN_Library
HBA75_22030	2	8.32536e-05	1	pPN_Library
HBA75_22035	11	0.000457895	2	pPN_Library
HBA75_22050	13	0.000541148	2	pPN_Library
HBA75_22070	2	8.32536e-05	1	pPN_Library
HBA75_22125	3	0.00012488	1	pPN_Library
HBA75_22160	11	0.000457895	2	pPN_Library
HBA75_22320	1	4.16268e-05	1	pPN_Library
HBA75_22430	24	0.000999043	2	pPN_Library
HBA75_22455	5	0.000208134	1	pPN_Library
HBA75_22670	40	0.00166507	2	pPN_Library
HBA75_22710	1	4.16268e-05	1	pPN_Library
HBA75_22715	25	0.00104067	2	pPN_Library
HBA75_22720	238	0.00990718	3	pPN_Library
HBA75_22765	125	0.00520335	3	pPN_Library
HBA75_22815	5	0.000208134	1	pPN_Library
HBA75_22825	1	4.16268e-05	1	pPN_Library
HBA75_22850	16	0.000666029	2	pPN_Library
HBA75_22855	24	0.000999043	2	pPN_Library
HBA75_22885	149	0.00620239	3	pPN_Library
HBA75_22900	5	0.000208134	1	pPN_Library
HBA75_22930	43	0.00178995	2	pPN_Library
HBA75_22945	240	0.00999043	3	pPN_Library
HBA75_22965	1	4.16268e-05	1	pPN_Library
HBA75_22980	11	0.000457895	2	pPN_Library
HBA75_23000	511	0.0212713	3	pPN_Library
HBA75_23040	1	4.16268e-05	1	pPN_Library
HBA75_23055	2	8.32536e-05	1	pPN_Library
HBA75_23065	4	0.000166507	1	pPN_Library
HBA75_23075	3	0.00012488	1	pPN_Library
HBA75_23085	296	0.0123215	3	pPN_Library
HBA75_23090	18	0.000749282	2	pPN_Library
HBA75_23100	45	0.00187321	2	pPN_Library
HBA75_23110	1	4.16268e-05	1	pPN_Library
HBA75_23150	6	0.000249761	1	pPN_Library
HBA75_23160	2	8.32536e-05	1	pPN_Library
HBA75_23195	1	4.16268e-05	1	pPN_Library
HBA75_23215	7	0.000291388	1	pPN_Library
HBA75_23320	195	0.00811722	3	pPN_Library
HBA75_23325	11	0.000457895	2	pPN_Library
HBA75_23340	9	0.000374641	1	pPN_Library
HBA75_23380	20	0.000832536	2	pPN_Library
HBA75_23410	1	4.16268e-05	1	pPN_Library
HBA75_23425	425	0.0176914	3	pPN_Library
HBA75_23510	56	0.0023311	2	pPN_Library
HBA75_23515	2	8.32536e-05	1	pPN_Library
HBA75_23525	272	0.0113225	3	pPN_Library
HBA75_23535	289	0.0120301	3	pPN_Library
HBA75_23540	523	0.0217708	3	pPN_Library
HBA75_23545	1	4.16268e-05	1	pPN_Library
HBA75_23575	1	4.16268e-05	1	pPN_Library
HBA75_23595	113	0.00470383	3	pPN_Library
HBA75_23625	53	0.00220622	2	pPN_Library
HBA75_23645	43	0.00178995	2	pPN_Library
HBA75_23725	107	0.00445407	3	pPN_Library
HBA75_23735	3	0.00012488	1	pPN_Library
HBA75_23805	13	0.000541148	2	pPN_Library
HBA75_23810	1	4.16268e-05	1	pPN_Library
HBA75_23815	3	0.00012488	1	pPN_Library
HBA75_23835	18	0.000749282	2	pPN_Library
HBA75_23840	80	0.00333014	2	pPN_Library
HBA75_23850	52	0.00216459	2	pPN_Library
HBA75_23865	42	0.00174833	2	pPN_Library
HBA75_23880	1	4.16268e-05	1	pPN_Library
HBA75_23885	25	0.00104067	2	pPN_Library
HBA75_23905	8	0.000333014	1	pPN_Library
HBA75_23930	39	0.00162344	2	pPN_Library
HBA75_23940	3	0.00012488	1	pPN_Library
HBA75_23950	3	0.00012488	1	pPN_Library
HBA75_23960	13	0.000541148	2	pPN_Library
HBA75_23965	10	0.000416268	2	pPN_Library
HBA75_23990	140	0.00582775	3	pPN_Library
HBA75_24000	1	4.16268e-05	1	pPN_Library
HBA75_24040	3	0.00012488	1	pPN_Library
HBA75_24070	2	8.32536e-05	1	pPN_Library
HBA75_24120	14	0.000582775	2	pPN_Library
HBA75_24130	3	0.00012488	1	pPN_Library
HBA75_24165	9	0.000374641	1	pPN_Library
HBA75_24175	28	0.00116555	2	pPN_Library
HBA75_24225	4	0.000166507	1	pPN_Library
HBA75_24300	1	4.16268e-05	1	pPN_Library
HBA75_24320	5	0.000208134	1	pPN_Library
HBA75_24345	15	0.000624402	2	pPN_Library
HBA75_24385	142	0.005911	3	pPN_Library
HBA75_24435	67	0.002789	2	pPN_Library
HBA75_24445	4	0.000166507	1	pPN_Library
HBA75_24455	518	0.0215627	3	pPN_Library
HBA75_24460	78	0.00324689	2	pPN_Library
HBA75_24510	1	4.16268e-05	1	pPN_Library
HBA75_24525	25	0.00104067	2	pPN_Library
HBA75_24670	1	4.16268e-05	1	pPN_Library
HBA75_24685	3	0.00012488	1	pPN_Library
HBA75_24735	25	0.00104067	2	pPN_Library
HBA75_24750	51	0.00212297	2	pPN_Library
HBA75_24765	64	0.00266411	2	pPN_Library
HBA75_24785	85	0.00353828	2	pPN_Library
HBA75_24805	215	0.00894976	3	pPN_Library
HBA75_24825	1	4.16268e-05	1	pPN_Library
HBA75_24875	8	0.000333014	1	pPN_Library
HBA75_24910	15	0.000624402	2	pPN_Library
HBA75_24925	5	0.000208134	1	pPN_Library
HBA75_24995	205	0.00853349	3	pPN_Library
HBA75_25030	2	8.32536e-05	1	pPN_Library
HBA75_25060	9	0.000374641	1	pPN_Library
HBA75_25150	19	0.000790909	2	pPN_Library
HBA75_25165	40	0.00166507	2	pPN_Library
HBA75_25265	25	0.00104067	2	pPN_Library
HBA75_25270	1	4.16268e-05	1	pPN_Library
HBA75_25320	68	0.00283062	2	pPN_Library
HBA75_25355	249	0.0103651	3	pPN_Library
HBA75_25380	5	0.000208134	1	pPN_Library
HBA75_25400	218	0.00907464	3	pPN_Library
HBA75_25405	26	0.0010823	2	pPN_Library
HBA75_25410	7	0.000291388	1	pPN_Library
HBA75_25415	79	0.00328852	2	pPN_Library
HBA75_25420	3	0.00012488	1	pPN_Library
HBA75_25440	191	0.00795072	3	pPN_Library
HBA75_25455	1	4.16268e-05	1	pPN_Library
HBA75_25465	32	0.00133206	2	pPN_Library
HBA75_25475	46	0.00191483	2	pPN_Library
HBA75_25510	158	0.00657703	3	pPN_Library
HBA75_25520	21	0.000874163	2	pPN_Library
HBA75_25525	63	0.00262249	2	pPN_Library
HBA75_25540	62	0.00258086	2	pPN_Library
HBA75_25575	3	0.00012488	1	pPN_Library
HBA75_25590	88	0.00366316	2	pPN_Library
HBA75_25620	55	0.00228947	2	pPN_Library
HBA75_25660	6	0.000249761	1	pPN_Library
HBA75_25680	20	0.000832536	2	pPN_Library
HBA75_25755	281	0.0116971	3	pPN_Library
HBA75_25775	1	4.16268e-05	1	pPN_Library
HBA75_25795	367	0.015277	3	pPN_Library
HBA75_25800	367	0.015277	3	pPN_Library
HBA75_25835	6	0.000249761	1	pPN_Library
HBA75_25845	165	0.00686842	3	pPN_Library
HBA75_25850	5	0.000208134	1	pPN_Library
HBA75_25855	3	0.00012488	1	pPN_Library
HBA75_25860	1	4.16268e-05	1	pPN_Library
HBA75_25870	2	8.32536e-05	1	pPN_Library
HBA75_25885	11	0.000457895	2	pPN_Library
HBA75_25985	24	0.000999043	2	pPN_Library
HBA75_26010	1	4.16268e-05	1	pPN_Library
HBA75_26015	1	4.16268e-05	1	pPN_Library
HBA75_26040	3	0.00012488	1	pPN_Library
HBA75_26060	1063	0.0442493	4	pPN_Library
HBA75_26070	376	0.0156517	3	pPN_Library
HBA75_26105	116	0.00482871	3	pPN_Library
HBA75_26110	6	0.000249761	1	pPN_Library
HBA75_26115	30	0.0012488	2	pPN_Library
HBA75_26120	71	0.0029555	2	pPN_Library
HBA75_26170	4	0.000166507	1	pPN_Library
HBA75_26215	63	0.00262249	2	pPN_Library
HBA75_26230	3	0.00012488	1	pPN_Library
HBA75_26275	5	0.000208134	1	pPN_Library
HBA75_26285	4	0.000166507	1	pPN_Library
HBA75_26305	9	0.000374641	1	pPN_Library
HBA75_26315	1	4.16268e-05	1	pPN_Library
HBA75_26325	144	0.00599426	3	pPN_Library
HBA75_26335	102	0.00424593	3	pPN_Library
HBA75_26345	15	0.000624402	2	pPN_Library
HBA75_26365	6	0.000249761	1	pPN_Library
HBA75_26375	109	0.00453732	3	pPN_Library
HBA75_26390	570	0.0237273	3	pPN_Library
HBA75_26395	17	0.000707655	2	pPN_Library
HBA75_26415	16	0.000666029	2	pPN_Library
HBA75_26440	42	0.00174833	2	pPN_Library
HBA75_26560	4	0.000166507	1	pPN_Library
HBA75_26675	13	0.000541148	2	pPN_Library
HBA75_26695	75	0.00312201	2	pPN_Library
HBA75_26720	3	0.00012488	1	pPN_Library
HBA75_26735	2	8.32536e-05	1	pPN_Library
HBA75_26740	2	8.32536e-05	1	pPN_Library
HBA75_26780	7	0.000291388	1	pPN_Library
HBA75_26820	152	0.00632727	3	pPN_Library
HBA75_26870	253	0.0105316	3	pPN_Library
HBA75_26960	84	0.00349665	2	pPN_Library
HBA75_26970	5	0.000208134	1	pPN_Library
HBA75_27005	7	0.000291388	1	pPN_Library
HBA75_27025	19	0.000790909	2	pPN_Library
HBA75_27035	38	0.00158182	2	pPN_Library
HBA75_27040	3	0.00012488	1	pPN_Library
HBA75_27060	1	4.16268e-05	1	pPN_Library
HBA75_27070	168	0.0069933	3	pPN_Library
HBA75_27075	31	0.00129043	2	pPN_Library
HBA75_27105	37	0.00154019	2	pPN_Library
HBA75_27115	95	0.00395455	2	pPN_Library
HBA75_27120	78	0.00324689	2	pPN_Library
HBA75_27135	1	4.16268e-05	1	pPN_Library
HBA75_27190	41	0.0017067	2	pPN_Library
HBA75_27225	5	0.000208134	1	pPN_Library
HBA75_27230	7	0.000291388	1	pPN_Library
HBA75_27305	5	0.000208134	1	pPN_Library
HBA75_27320	1	4.16268e-05	1	pPN_Library
HBA75_27330	40	0.00166507	2	pPN_Library
HBA75_27335	2	8.32536e-05	1	pPN_Library
HBA75_27390	56	0.0023311	2	pPN_Library
HBA75_27445	3	0.00012488	1	pPN_Library
HBA75_27455	3	0.00012488	1	pPN_Library
HBA75_27465	3	0.00012488	1	pPN_Library
HBA75_27520	250	0.0104067	3	pPN_Library
HBA75_27530	17	0.000707655	2	pPN_Library
HBA75_27550	10	0.000416268	2	pPN_Library
HBA75_27605	1476	0.0614411	4	pPN_Library
HBA75_27660	1116	0.0464555	4	pPN_Library
HBA75_27675	1	4.16268e-05	1	pPN_Library
HBA75_27735	349	0.0145278	3	pPN_Library
HBA75_27740	33	0.00137368	2	pPN_Library
HBA75_27745	56	0.0023311	2	pPN_Library
HBA75_27760	67	0.002789	2	pPN_Library
HBA75_27790	522	0.0217292	3	pPN_Library
HBA75_27855	13	0.000541148	2	pPN_Library
HBA75_27910	2	8.32536e-05	1	pPN_Library
HBA75_27915	2	8.32536e-05	1	pPN_Library
HBA75_27930	20	0.000832536	2	pPN_Library
HBA75_27960	1	4.16268e-05	1	pPN_Library
HBA75_27975	98	0.00407943	2	pPN_Library
HBA75_27995	52	0.00216459	2	pPN_Library
HBA75_28015	4	0.000166507	1	pPN_Library
HBA75_28080	4	0.000166507	1	pPN_Library
HBA75_28090	22	0.000915789	2	pPN_Library
HBA75_28175	15	0.000624402	2	pPN_Library
HBA75_28210	24	0.000999043	2	pPN_Library
HBA75_28230	54	0.00224785	2	pPN_Library
HBA75_28250	5	0.000208134	1	pPN_Library
HBA75_28255	1	4.16268e-05	1	pPN_Library
HBA75_28265	1	4.16268e-05	1	pPN_Library
HBA75_28270	250	0.0104067	3	pPN_Library
HBA75_28325	45	0.00187321	2	pPN_Library
HBA75_28385	269	0.0111976	3	pPN_Library
HBA75_28465	264	0.0109895	3	pPN_Library
HBA75_28480	12	0.000499522	2	pPN_Library
HBA75_28495	34	0.00141531	2	pPN_Library
HBA75_28515	6	0.000249761	1	pPN_Library
HBA75_28540	2	8.32536e-05	1	pPN_Library
HBA75_28545	3	0.00012488	1	pPN_Library
HBA75_28550	42	0.00174833	2	pPN_Library
HBA75_28605	1	4.16268e-05	1	pPN_Library
HBA75_28625	1	4.16268e-05	1	pPN_Library
HBA75_28785	38	0.00158182	2	pPN_Library
HBA75_28840	9	0.000374641	1	pPN_Library
HBA75_28900	378	0.0157349	3	pPN_Library
HBA75_29065	1	4.16268e-05	1	pPN_Library
HBA75_29085	59	0.00245598	2	pPN_Library
HBA75_29095	51	0.00212297	2	pPN_Library
HBA75_29135	4	0.000166507	1	pPN_Library
HBA75_29230	2	8.32536e-05	1	pPN_Library
HBA75_29365	47	0.00195646	2	pPN_Library
HBA75_29395	2	8.32536e-05	1	pPN_Library
HBA75_29430	3	0.00012488	1	pPN_Library
HBA75_29475	388	0.0161512	3	pPN_Library
HBA75_29480	136	0.00566124	3	pPN_Library
HBA75_29495	21	0.000874163	2	pPN_Library
HBA75_29520	27	0.00112392	2	pPN_Library
HBA75_29595	1	4.16268e-05	1	pPN_Library
HBA75_29670	5096	0.21213	4	pPN_Library
HBA75_29700	1	4.16268e-05	1	pPN_Library
HBA75_29725	107	0.00445407	3	pPN_Library
HBA75_29750	1	4.16268e-05	1	pPN_Library
HBA75_29995	229	0.00953254	3	pPN_Library
HBA75_30055	13	0.000541148	2	pPN_Library
HBA75_30095	31	0.00129043	2	pPN_Library
HBA75_30110	5	0.000208134	1	pPN_Library
HBA75_30165	1	4.16268e-05	1	pPN_Library
HBA75_30190	2	8.32536e-05	1	pPN_Library
HBA75_30195	98	0.00407943	2	pPN_Library
HBA75_30225	50	0.00208134	2	pPN_Library
HBA75_30235	9	0.000374641	1	pPN_Library
HBA75_30270	12	0.000499522	2	pPN_Library
HBA75_30285	462	0.0192316	3	pPN_Library
HBA75_30325	20	0.000832536	2	pPN_Library
HBA75_30395	1	4.16268e-05	1	pPN_Library
HBA75_30400	1452	0.0604421	4	pPN_Library
HBA75_30405	12	0.000499522	2	pPN_Library
HBA75_30410	50	0.00208134	2	pPN_Library
HBA75_30415	77	0.00320526	2	pPN_Library
HBA75_30425	163	0.00678517	3	pPN_Library
HBA75_30450	484	0.0201474	3	pPN_Library
HBA75_30455	8	0.000333014	1	pPN_Library
HBA75_30470	10	0.000416268	2	pPN_Library
HBA75_30485	34	0.00141531	2	pPN_Library
HBA75_30495	35	0.00145694	2	pPN_Library
HBA75_30505	8	0.000333014	1	pPN_Library
HBA75_30510	172	0.00715981	3	pPN_Library
HBA75_30515	14	0.000582775	2	pPN_Library
HBA75_30555	8	0.000333014	1	pPN_Library
HBA75_30595	34	0.00141531	2	pPN_Library
HBA75_30635	3952	0.164509	4	pPN_Library
HBA75_30655	13	0.000541148	2	pPN_Library
HBA75_30675	128	0.00532823	3	pPN_Library
HBA75_30685	84	0.00349665	2	pPN_Library
HBA75_30690	5	0.000208134	1	pPN_Library
HBA75_30695	2	8.32536e-05	1	pPN_Library
HBA75_30720	735	0.0305957	3	pPN_Library
HBA75_30750	27	0.00112392	2	pPN_Library
HBA75_30760	19	0.000790909	2	pPN_Library
HBA75_30790	2	8.32536e-05	1	pPN_Library
HBA75_30795	1	4.16268e-05	1	pPN_Library
HBA75_30840	1	4.16268e-05	1	pPN_Library
HBA75_30865	55	0.00228947	2	pPN_Library
HBA75_30930	2	8.32536e-05	1	pPN_Library
HBA75_30980	2	8.32536e-05	1	pPN_Library
HBA75_30985	84	0.00349665	2	pPN_Library
HBA75_31035	264	0.0109895	3	pPN_Library
HBA75_31050	19	0.000790909	2	pPN_Library

## Sheet: Supplementary_Table_2
Supplementary Table 2. Illumina reads of the Y2H positives samples after each filtering step .
Sample (B35ORF_baitplasmid_preyplasmid_Library(L)_size)	Raw	Trimmomatic	Seqtk	ATG	Non ATG	Fragments Total	Fragments ATG	Fragments NonATG	Fragments ATG Unique	Fragments In-frame	Fragments Rejected	Fragments In-frame Unique	Fragments Y2H Validated Unique	Fragments Y2H Validated	BioProject	BioSample	SRA-study	SRA-entry
01_pBC_pPC_L_over300	12104	12094	12094	11730	364	11639	11554	85	151	11385	32	125	44	11221	PRJNA717632	SAMN18499225	SRP312264	SRR14075581
01_pBC_pPN_L_over300	9321	8970	8970	7903	1067	6844	6450	394	103	6437	1019	92	92	6437	PRJNA717632	SAMN18499226	SRP312264	SRR14075564
01_pBN_pPC_L_over300	13229	13213	13213	12814	399	12639	12509	130	66	12375	122	49	27	12162	PRJNA717632	SAMN18499227	SRP312264	SRR14075553
01_pBN_pPN_L_over300	11728	11452	11452	10270	1182	10216	10194	22	783	1992	3	80	41	395	PRJNA717632	SAMN18499228	SRP312264	SRR14075542
01_pBN_pPN_L_under300	67624	36132	36132	18645	17487	18360	17930	430	579	346	108	51	30	289	PRJNA717632	SAMN18499229	SRP312264	SRR14075531
02_pBC_pPC_L_over300	10675	10666	10666	10306	360	10209	10119	90	155	9806	33	105	48	9646	PRJNA717632	SAMN18499230	SRP312264	SRR14075520
02_pBC_pPN_L_over300	12587	12520	12520	12278	242	10282	9531	751	88	9142	1929	59	57	9127	PRJNA717632	SAMN18499231	SRP312264	SRR14075509
02_pBN_pPC_L_over300	14417	14379	14379	13548	831	13445	13390	55	108	13123	7	72	27	12953	PRJNA717632	SAMN18499232	SRP312264	SRR14075498
02_pBN_pPN_L_over300	11943	11904	11904	7425	4479	7302	7223	79	58	6224	66	35	35	6224	PRJNA717632	SAMN18499233	SRP312264	SRR14075691
03_pBC_pPC_L_over300	8604	8594	8594	8403	191	6437	3970	2467	19	3491	1853	7	3	3460	PRJNA717632	SAMN18499234	SRP312264	SRR14075680
03_pBC_pPN_L	no result
03_pBN_pPC_L_over300	10957	10930	10930	10300	630	10151	9977	174	113	9949	36	101	50	9805	PRJNA717632	SAMN18499235	SRP312264	SRR14075669
03_pBN_pPC_L_under300	19658	13681	13681	8649	5032	7946	5304	2642	313	5023	190	251	103	4395	PRJNA717632	SAMN18499236	SRP312264	SRR14075658
03_pBN_pPN_L_over300	16323	16228	16228	15835	393	15802	15781	21	16	15780	0	15	15	15780	PRJNA717632	SAMN18499237	SRP312264	SRR14075647
04_pBC_pPC_L_over300	9825	9787	9787	9267	520	9177	9124	53	268	8620	17	158	76	8446	PRJNA717632	SAMN18499238	SRP312264	SRR14075636
04_pBC_pPN_L_over300	11776	11302	11302	10292	1010	10142	10054	88	513	225	29	28	15	108	PRJNA717632	SAMN18499239	SRP312264	SRR14075625
04_pBC_pPN_L_under300	32060	8172	8172	4230	3942	3422	3025	397	371	37	67	17	13	29	PRJNA717632	SAMN18499240	SRP312264	SRR14075614
04_pBN_pPC_L_over300	8705	8691	8691	8446	245	8076	8044	32	99	8018	285	86	39	7616	PRJNA717632	SAMN18499241	SRP312264	SRR14075603
04_pBN_pPN_L	no result
05_pBC_pPC_L_over300	11959	11931	11931	11472	459	11406	11343	63	234	10893	15	136	65	10677	PRJNA717632	SAMN18499242	SRP312264	SRR14075592
05_pBC_pPN_L	no result
05_pBN_pPC_L_over300	9059	9038	9038	8791	247	8728	8676	52	57	6872	1	38	19	5215	PRJNA717632	SAMN18499243	SRP312264	SRR14075580
05_pBN_pPN_L_over300	6312	6217	6217	6000	217	5874	5865	9	61	5853	2	49	47	5851	PRJNA717632	SAMN18499244	SRP312264	SRR14075573
06_pBC_pPC_L_over300	9454	9442	9442	8815	627	8746	8691	55	170	8639	29	144	81	8479	PRJNA717632	SAMN18499245	SRP312264	SRR14075572
06_pBC_pPC_L_under300	19674	19228	19228	12774	6454	12140	11754	386	240	11683	563	199	89	11355	PRJNA717632	SAMN18499246	SRP312264	SRR14075571
06_pBC_pPN_L_over300	6694	6654	6654	6430	224	6232	6131	101	213	5253	113	49	41	5201	PRJNA717632	SAMN18499247	SRP312264	SRR14075570
06_pBN_pPC_L_over300	9852	9823	9823	9430	393	9321	9256	65	225	8000	27	189	107	8078	PRJNA717632	SAMN18499248	SRP312264	SRR14075569
06_pBN_pPN_L_over300	6816	6786	6786	6549	237	6505	6484	21	78	4	0	4	1	1	PRJNA717632	SAMN18499249	SRP312264	SRR14075568
07_pBC_pPC_L_over300	11066	11048	11048	10355	693	10274	10219	55	127	10133	31	103	46	9964	PRJNA717632	SAMN18499250	SRP312264	SRR14075567
07_pBC_pPC_L_under300	13997	12821	12821	2461	10360	1943	1518	425	208	1405	428	162	62	692	PRJNA717632	SAMN18499251	SRP312264	SRR14075566
07_pBC_pPN_L_over300	14504	14162	14162	13516	646	11449	10655	794	112	10491	2000	93	93	10491	PRJNA717632	SAMN18499252	SRP312264	SRR14075565
07_pBC_pPN_L_under300	140663	79847	79847	39151	40696	22228	13689	8539	710	12668	16371	544	539	12663	PRJNA717632	SAMN18499253	SRP312264	SRR14075563
07_pBN_pPC_L_over300	11011	11001	11001	10740	261	10681	10658	23	74	10624	5	65	31	10490	PRJNA717632	SAMN18499254	SRP312264	SRR14075562
07_pBN_pPN_L_over300	14708	14599	14599	1212	13387	1175	1158	17	28	849	10	19	19	849	PRJNA717632	SAMN18499255	SRP312264	SRR14075561
07_pBN_pPN_L_under300	22081	20070	20070	198	19872	173	107	66	36	20	2	13	13	20	PRJNA717632	SAMN18499256	SRP312264	SRR14075560
08_pBC_pPC_L_over300	10552	10534	10534	9909	625	9817	9760	57	105	9651	38	76	31	9486	PRJNA717632	SAMN18499257	SRP312264	SRR14075559
08_pBC_pPC_L_under300	82138	79794	79794	50559	29235	45944	44056	1888	329	43869	4091	240	82	42828	PRJNA717632	SAMN18499258	SRP312264	SRR14075558
08_pBC_pPN_L_over300	7769	7647	7647	7285	362	6954	6561	393	55	5788	260	38	38	5788	PRJNA717632	SAMN18499259	SRP312264	SRR14075557
08_pBC_pPN_L_under300	32827	19125	19125	1240	17885	1192	958	234	127	553	11	72	72	553	PRJNA717632	SAMN18499260	SRP312264	SRR14075556
08_pBN_pPC_L_over300	10920	10913	10913	10594	319	10513	10459	54	169	10408	23	153	77	10217	PRJNA717632	SAMN18499261	SRP312264	SRR14075555
08_pBN_pPN_L_over300	9802	9770	9770	3760	6010	3496	3398	98	112	2378	243	56	54	2376	PRJNA717632	SAMN18499262	SRP312264	SRR14075554
08_pBN_pPN_L_under300	18040	11131	11131	1018	10113	862	629	233	206	315	126	111	111	315	PRJNA717632	SAMN18499263	SRP312264	SRR14075552
09_pBC_pPC_L_over300	10494	10476	10476	10195	281	10099	10051	48	111	9990	44	88	30	9808	PRJNA717632	SAMN18499264	SRP312264	SRR14075551
09_pBC_pPN_L_over300	8655	8499	8499	8253	246	7476	7195	281	69	6648	729	47	45	6645	PRJNA717632	SAMN18499265	SRP312264	SRR14075550
09_pBN_pPC_L_over300	9393	9383	9383	9096	287	8989	8741	248	136	8627	56	118	63	8657	PRJNA717632	SAMN18499266	SRP312264	SRR14075549
09_pBN_pPN_L_over300	11237	10631	10631	9813	818	9560	9455	105	962	214	176	71	42	141	PRJNA717632	SAMN18499267	SRP312264	SRR14075548
09_pBN_pPN_L_under300	33623	19247	19247	11020	8227	9175	8396	779	380	45	1691	20	15	36	PRJNA717632	SAMN18499268	SRP312264	SRR14075547
10_pBC_pPC_L_over300	9602	9577	9577	9120	457	9014	8948	66	190	8725	34	145	67	8510	PRJNA717632	SAMN18499269	SRP312264	SRR14075546
10_pBC_pPC_L_under300	17500	13829	13829	10821	3008	9981	8472	1509	530	7912	641	347	128	5619	PRJNA717632	SAMN18499270	SRP312264	SRR14075545
10_pBC_pPN_L_over300	11614	11203	11203	10496	707	9136	8572	564	195	8292	1288	134	133	8290	PRJNA717632	SAMN18499271	SRP312264	SRR14075544
10_pBC_pPN_L_under300	95334	40799	40799	23667	17132	15940	10424	5516	1162	7911	7090	753	750	7908	PRJNA717632	SAMN18499272	SRP312264	SRR14075543
10_pBN_pPC_L_over300	10282	9813	9813	9307	506	9157	9019	138	1179	644	76	124	14	60	PRJNA717632	SAMN18499273	SRP312264	SRR14075541
10_pBN_pPC_L_under300	33213	5629	5629	4470	1159	4244	4179	65	299	19	37	16	4	5	PRJNA717632	SAMN18499274	SRP312264	SRR14075540
10_pBN_pPN_L_over300	12874	12136	12136	11592	544	11489	11422	67	1519	4244	7	128	62	348	PRJNA717632	SAMN18499275	SRP312264	SRR14075539
10_pBN_pPN_L_under300	40471	18195	18195	15255	2940	14947	14697	250	588	219	52	19	14	210	PRJNA717632	SAMN18499276	SRP312264	SRR14075538
11_pBC_pPC_L_over300	15835	13804	13804	11160	2644	11067	10982	85	346	2146	11	64	33	1908	PRJNA717632	SAMN18499277	SRP312264	SRR14075537
11_pBC_pPC_L_under300	50145	17040	17040	8710	8330	8209	7994	215	125	1407	403	27	16	1384	PRJNA717632	SAMN18499278	SRP312264	SRR14075536
11_pBC_pPN_L_over300	17741	17707	17707	49	17658	5	3	2	3	1	1	1	1	1	PRJNA717632	SAMN18499279	SRP312264	SRR14075535
11_pBC_pPN_L_under300	26890	26837	26837	28	26809	1	1	0	1	0	0	0	0	0	PRJNA717632	SAMN18499280	SRP312264	SRR14075534
11_pBN_pPC_L_over300	5571	5565	5565	5336	229	5247	5229	18	50	5224	4	45	21	5135	PRJNA717632	SAMN18499281	SRP312264	SRR14075533
11_pBN_pPN_L_over300	10742	10502	10502	10017	485	9904	9869	35	30	0	2	0	0	0	PRJNA717632	SAMN18499282	SRP312264	SRR14075532
11_pBN_pPN_L_under300	31547	2908	2908	926	1982	846	701	145	26	0	6	0	0	0	PRJNA717632	SAMN18499283	SRP312264	SRR14075530
12_pBC_pPC_L_over300	11700	11675	11675	11325	350	11230	11129	101	138	11070	55	113	46	10884	PRJNA717632	SAMN18499284	SRP312264	SRR14075529
12_pBC_pPN_L_over300	12839	12453	12453	11923	530	10592	10058	534	81	9828	1260	62	61	9814	PRJNA717632	SAMN18499285	SRP312264	SRR14075528
12_pBN_pPC_L_over300	8758	8653	8653	8270	383	8068	7973	95	91	7442	70	56	27	7289	PRJNA717632	SAMN18499286	SRP312264	SRR14075527
12_pBN_pPC_L_under300	16160	876	876	366	510	325	300	25	46	233	24	18	11	214	PRJNA717632	SAMN18499287	SRP312264	SRR14075526
12_pBN_pPN_L_over300	11225	10937	10937	10417	520	10345	10319	26	65	9	0	5	4	7	PRJNA717632	SAMN18499288	SRP312264	SRR14075525
12_pBN_pPN_L_under300	30500	11954	11954	691	11263	659	292	367	71	0	4	0	0	0	PRJNA717632	SAMN18499289	SRP312264	SRR14075524
13_pBC_pPC_L_over300	8635	8629	8629	8349	280	8298	8253	45	100	8143	10	79	35	8027	PRJNA717632	SAMN18499290	SRP312264	SRR14075523
13_pBC_pPN_L_over300	14413	14075	14075	12195	1880	10375	9644	731	108	9495	1744	82	82	9495	PRJNA717632	SAMN18499291	SRP312264	SRR14075522
13_pBN_pPC_L_over300	9337	9306	9306	9009	297	8938	8889	49	176	8644	21	160	86	8992	PRJNA717632	SAMN18499292	SRP312264	SRR14075521
13_pBN_pPN_L_over300	8060	7944	7944	7696	248	7580	7563	17	49	7551	2	46	46	7551	PRJNA717632	SAMN18499293	SRP312264	SRR14075519
14_pBC_pPC_L_over300	10040	10006	10006	9416	590	9330	9279	51	136	9234	26	112	49	9068	PRJNA717632	SAMN18499294	SRP312264	SRR14075518
14_pBC_pPC_L_under300	49425	47402	47402	33071	14331	31720	30854	866	328	30626	1056	257	89	29780	PRJNA717632	SAMN18499295	SRP312264	SRR14075517
14_pBC_pPN_L_over300	10293	10268	10268	7	10261	1	1	0	1	0	0	0	0	0	PRJNA717632	SAMN18499296	SRP312264	SRR14075516
14_pBC_pPN_L_under300	49538	47862	47862	13	47849	3	2	1	2	1	0	1	1	1	PRJNA717632	SAMN18499297	SRP312264	SRR14075515
14_pBN_pPC_L_over300	9417	9392	9392	9161	231	9028	8705	323	77	8586	64	71	38	8460	PRJNA717632	SAMN18499298	SRP312264	SRR14075514
14_pBN_pPN_L_over300	8592	8574	8574	8349	225	8249	5379	2870	30	2567	3	16	16	2567	PRJNA717632	SAMN18499299	SRP312264	SRR14075513
15_pBC_pPC_L_over300	11614	11598	11598	11042	556	9110	8364	746	69	8263	1840	65	24	7997	PRJNA717632	SAMN18499300	SRP312264	SRR14075512
15_pBC_pPN_L_over300	13224	12771	12771	11648	1123	11379	11291	88	869	1613	176	87	45	398	PRJNA717632	SAMN18499301	SRP312264	SRR14075511
15_pBC_pPN_L_under300	33827	19431	19431	9625	9806	6259	4941	1318	290	127	3242	18	8	20	PRJNA717632	SAMN18499302	SRP312264	SRR14075510
15_pBN_pPC_L_over300	9558	9510	9510	9227	283	9064	9009	55	98	8943	66	71	40	8800	PRJNA717632	SAMN18499303	SRP312264	SRR14075508
15_pBN_pPN_L_over300	9454	9444	9444	9130	314	9016	8980	36	110	8791	17	37	32	8786	PRJNA717632	SAMN18499304	SRP312264	SRR14075507
16_pBC_pPC_L	no result
16_pBC_pPN_L	no result
16_pBN_pPC_L_over300	20416	20321	20321	19414	907	19211	19143	68	118	19069	35	98	51	18874	PRJNA717632	SAMN18499305	SRP312264	SRR14075506
16_pBN_pPN_L_over300	9548	9530	9530	9253	277	9146	9132	14	37	9125	2	30	30	9125	PRJNA717632	SAMN18499306	SRP312264	SRR14075505
17_pBC_pPC_L_over300	13143	13073	13073	12519	554	12361	12261	100	206	12039	79	141	56	11831	PRJNA717632	SAMN18499307	SRP312264	SRR14075504
17_pBC_pPN_L_over300	12634	11613	11613	11058	555	10373	10004	369	255	9416	626	146	139	9371	PRJNA717632	SAMN18499308	SRP312264	SRR14075503
17_pBC_pPN_L_under300	36224	8138	8138	4536	3602	4047	2866	1181	443	1929	432	241	237	1925	PRJNA717632	SAMN18499309	SRP312264	SRR14075502
17_pBN_pPC_L_over300	12516	12472	12472	11757	715	11654	11568	86	215	11304	30	192	118	11419	PRJNA717632	SAMN18499310	SRP312264	SRR14075501
17_pBN_pPN_L_over300	6404	6361	6361	6064	297	5966	5959	7	47	5957	1	45	45	5957	PRJNA717632	SAMN18499311	SRP312264	SRR14075500
18_pBC_pPC_L_over300	9871	9846	9846	9535	311	9483	9427	56	104	9394	11	84	33	9254	PRJNA717632	SAMN18499312	SRP312264	SRR14075499
18_pBC_pPN_L_over300	11111	10800	10800	10267	533	9085	8635	450	78	8031	1086	55	55	8031	PRJNA717632	SAMN18499313	SRP312264	SRR14075497
18_pBN_pPC_L_over300	11373	11361	11361	10871	490	10707	10593	114	61	10545	102	52	25	10413	PRJNA717632	SAMN18499314	SRP312264	SRR14075496
18_pBN_pPN_L	no result
19_pBC_pPC_L	no result
19_pBC_pPN_L	no result
19_pBN_pPC_L_over300	10390	10340	10340	9953	387	9785	9702	83	130	9659	74	102	56	9512	PRJNA717632	SAMN18499315	SRP312264	SRR14075495
19_pBN_pPN_L	no result
19t_pBC_pPC_L_over300	10677	10646	10646	10074	572	9944	9893	51	159	4812	45	52	18	4680	PRJNA717632	SAMN18499316	SRP312264	SRR14075494
19t_pBC_pPN_L_over300	14979	14073	14073	13641	432	11317	10312	1005	205	8348	2201	90	86	8023	PRJNA717632	SAMN18499317	SRP312264	SRR14075493
19t_pBN_pPC_L_over300	8730	8514	8514	7931	583	7815	7725	90	415	4600	61	106	53	4462	PRJNA717632	SAMN18499318	SRP312264	SRR14075492
19t_pBN_pPC_L_under300	28151	12633	12633	8511	4122	8166	7552	614	591	711	243	155	65	347	PRJNA717632	SAMN18499319	SRP312264	SRR14075491
19t_pBN_pPN_L_over300	14063	11506	11506	10954	552	9988	9449	539	638	2999	890	124	104	2480	PRJNA717632	SAMN18499320	SRP312264	SRR14075490
19t_pBN_pPN_L_under300	108577	30691	30691	23912	6779	22658	20913	1745	1742	1331	933	325	309	1296	PRJNA717632	SAMN18499321	SRP312264	SRR14075489
20_pBC_pPC_L_over300	9485	9208	9208	8837	371	8779	8761	18	418	1021	1	53	16	496	PRJNA717632	SAMN18499322	SRP312264	SRR14075488
20_pBC_pPC_L_under300	27905	8737	8737	8144	593	8042	8000	42	304	61	18	27	6	18	PRJNA717632	SAMN18499323	SRP312264	SRR14075690
20_pBC_pPN_L	no result
20_pBN_pPC_L_over300	9701	9672	9672	6145	3527	6070	6050	20	94	5975	6	88	38	5868	PRJNA717632	SAMN18499324	SRP312264	SRR14075689
20_pBN_pPC_L_under300	21325	20923	20923	228	20695	140	100	40	38	74	0	25	13	52	PRJNA717632	SAMN18499325	SRP312264	SRR14075688
20_pBN_pPN_L_over300	11301	11201	11201	9988	1213	9943	9926	17	359	827	1	32	22	551	PRJNA717632	SAMN18499326	SRP312264	SRR14075687
20_pBN_pPN_L_under300	35674	29310	29310	595	28715	551	526	25	157	72	7	8	6	63	PRJNA717632	SAMN18499327	SRP312264	SRR14075686
20t_pBC_pPC_L_over300	14904	14827	14827	13315	1512	13182	13018	164	188	12896	43	152	62	12655	PRJNA717632	SAMN18499328	SRP312264	SRR14075685
20t_pBC_pPC_L_under300	142969	134340	134340	51776	82564	48775	42749	6026	533	41817	2315	393	141	39691	PRJNA717632	SAMN18499329	SRP312264	SRR14075684
20t_pBC_pPN_L_over300	14957	14470	14470	13671	799	11694	10985	709	154	10762	1887	112	112	10762	PRJNA717632	SAMN18499330	SRP312264	SRR14075683
20t_pBN_pPC_L_over300	10227	10178	10178	9755	423	9616	9504	112	183	9431	52	156	83	9234	PRJNA717632	SAMN18499331	SRP312264	SRR14075682
20t_pBN_pPN_L_over300	10825	10518	10518	8130	2388	8068	8041	27	704	489	2	64	33	328	PRJNA717632	SAMN18499332	SRP312264	SRR14075681
20t_pBN_pPN_L_under300	52180	38830	38830	2621	36209	2530	2438	92	272	38	33	23	17	26	PRJNA717632	SAMN18499333	SRP312264	SRR14075679
21_pBC_pPC_L_over300	20236	18784	18784	6373	12411	6307	6272	35	432	115	3	47	13	21	PRJNA717632	SAMN18499334	SRP312264	SRR14075678
21_pBC_pPC_L_under300	20812	8553	8553	1332	7221	1314	1307	7	35	2	2	2	0	0	PRJNA717632	SAMN18499335	SRP312264	SRR14075677
21_pBC_pPN_L_over300	14667	12980	12980	12049	931	11882	11766	116	1083	231	32	77	41	105	PRJNA717632	SAMN18499336	SRP312264	SRR14075676
21_pBC_pPN_L_under300	49492	13852	13852	7191	6661	6810	6354	456	618	159	121	31	22	146	PRJNA717632	SAMN18499337	SRP312264	SRR14075675
21_pBN_pPC_L_over300	11797	11721	11721	11356	365	11260	11188	72	57	11106	1	46	21	10955	PRJNA717632	SAMN18499338	SRP312264	SRR14075674
21_pBN_pPC_L_under300	26719	17066	17066	15727	1339	15556	15349	207	47	14932	5	19	8	14876	PRJNA717632	SAMN18499339	SRP312264	SRR14075673
21_pBN_pPN_L_over300	15528	14677	14677	13274	1403	13079	13009	70	815	818	122	71	28	389	PRJNA717632	SAMN18499340	SRP312264	SRR14075672
21_pBN_pPN_L_under300	83652	44902	44902	15453	29449	15200	14851	349	736	230	111	41	30	190	PRJNA717632	SAMN18499341	SRP312264	SRR14075671
21t_pBC_pPC_L_over300	10991	10975	10975	10680	295	10614	10564	50	84	10557	17	77	27	10396	PRJNA717632	SAMN18499342	SRP312264	SRR14075670
21t_pBC_pPN_L_over300	12971	12120	12120	11689	431	10830	10483	347	116	10453	768	95	95	10453	PRJNA717632	SAMN18499343	SRP312264	SRR14075668
21t_pBN_pPC_L_over300	10643	10634	10634	10360	274	10277	10256	21	109	1233	0	15	4	1100	PRJNA717632	SAMN18499344	SRP312264	SRR14075667
21t_pBN_pPN_L_over300	10415	10295	10295	9844	451	9133	8251	882	37	18	656	2	2	18	PRJNA717632	SAMN18499345	SRP312264	SRR14075666
21t_pBN_pPN_L_under300	6781	1408	1408	382	1026	362	290	72	29	4	16	1	1	4	PRJNA717632	SAMN18499346	SRP312264	SRR14075665
22_pBC_pPC_L_over300	11560	11556	11556	11272	284	11191	11169	22	83	8466	0	58	26	8356	PRJNA717632	SAMN18499347	SRP312264	SRR14075664
22_pBC_pPN_L_over300	9981	9752	9752	9388	364	8454	8110	344	89	7997	864	72	72	7997	PRJNA717632	SAMN18499348	SRP312264	SRR14075663
22_pBN_pPC_L_over300	12150	12126	12126	11504	622	11349	11300	49	110	11200	30	76	37	11043	PRJNA717632	SAMN18499349	SRP312264	SRR14075662
22_pBN_pPN_L_over300	13051	13032	13032	12494	538	12372	12341	31	38	12331	0	31	31	12331	PRJNA717632	SAMN18499350	SRP312264	SRR14075661
23_pBC_pPC_L_over300	11587	11572	11572	10983	589	8789	6045	2744	93	31	2065	16	15	30	PRJNA717632	SAMN18499351	SRP312264	SRR14075660
23_pBC_pPN_L_over300	15274	14350	14350	13171	1179	13057	12957	100	515	400	31	41	24	232	PRJNA717632	SAMN18499352	SRP312264	SRR14075659
23_pBC_pPN_L_under300	120359	20007	20007	10594	9413	10008	7606	2402	1097	252	385	49	44	202	PRJNA717632	SAMN18499353	SRP312264	SRR14075657
23_pBN_pPC_L_over300	12425	12311	12311	11904	407	11796	11745	51	115	11664	37	75	40	11514	PRJNA717632	SAMN18499354	SRP312264	SRR14075656
23_pBN_pPC_L_under300	376	270	270	198	72	198	127	71	31	67	0	24	13	48	PRJNA717632	SAMN18499355	SRP312264	SRR14075655
23_pBN_pPN_L_over300	12605	12553	12553	12022	531	11928	11902	26	78	203	8	22	21	198	PRJNA717632	SAMN18499356	SRP312264	SRR14075654
24_pBC_pPC_L_over300	12357	12240	12240	11564	676	11291	11202	89	70	9588	160	46	19	9450	PRJNA717632	SAMN18499357	SRP312264	SRR14075653
24_pBC_pPN_L_over300	12778	12388	12388	11892	496	5860	3575	2285	46	3544	5939	35	35	3544	PRJNA717632	SAMN18499358	SRP312264	SRR14075652
24_pBC_pPN_L_under300	51122	1639	1639	1355	284	798	499	299	64	334	516	40	39	332	PRJNA717632	SAMN18499359	SRP312264	SRR14075651
24_pBN_pPC_L_over300	16200	15850	15850	15276	574	15172	15099	73	244	14099	27	201	114	14354	PRJNA717632	SAMN18499360	SRP312264	SRR14075650
24_pBN_pPC_L_under300	64433	58925	58925	47665	11260	46247	42985	3262	500	42693	1069	366	150	41432	PRJNA717632	SAMN18499361	SRP312264	SRR14075649
24_pBN_pPN_L_over300	7766	7654	7654	7314	340	7180	7082	98	99	6122	7	70	68	6120	PRJNA717632	SAMN18499362	SRP312264	SRR14075648
25_pBC_pPC_L_over300	11245	11150	11150	9257	1893	9159	9074	85	175	8997	38	132	77	8833	PRJNA717632	SAMN18499363	SRP312264	SRR14075646
25_pBC_pPC_L_under300	31157	30803	30803	3634	27169	3446	3269	177	113	3246	121	92	53	3165	PRJNA717632	SAMN18499364	SRP312264	SRR14075645
25_pBC_pPN_L_over300	16034	15966	15966	15480	486	15418	15382	36	57	15286	5	50	50	15286	PRJNA717632	SAMN18499365	SRP312264	SRR14075644
25_pBN_pPC_L_over300	14129	14005	14005	11771	2234	11434	11176	258	206	11112	281	180	102	10890	PRJNA717632	SAMN18499366	SRP312264	SRR14075643
25_pBN_pPC_L_under300	24585	24103	24103	3180	20923	2791	2364	427	71	2344	349	61	30	2283	PRJNA717632	SAMN18499367	SRP312264	SRR14075642
25_pBN_pPN_L_over300	16021	15692	15692	14286	1406	14182	14141	41	75	9362	0	37	37	9362	PRJNA717632	SAMN18499368	SRP312264	SRR14075641
25_pBN_pPN_L_under300	84046	8193	8193	1607	6586	1576	1242	334	60	655	0	28	28	655	PRJNA717632	SAMN18499369	SRP312264	SRR14075640
25t_pBC_pPC_L_over300	18897	17951	17951	16450	1501	16305	16166	139	910	1303	35	131	55	858	PRJNA717632	SAMN18499370	SRP312264	SRR14075639
25t_pBC_pPC_L_under300	40127	18156	18156	13500	4656	13320	13178	142	318	281	42	31	11	170	PRJNA717632	SAMN18499371	SRP312264	SRR14075638
25t_pBC_pPN_L_over300	14518	14079	14079	13499	580	13414	13339	75	1302	3057	15	190	131	1194	PRJNA717632	SAMN18499372	SRP312264	SRR14075637
25t_pBC_pPN_L_under300	17558	3866	3866	3329	537	3239	2926	313	404	72	41	29	24	61	PRJNA717632	SAMN18499373	SRP312264	SRR14075635
25t_pBN_pPC_L_over300	10649	10188	10188	9563	625	9438	9338	100	173	9111	51	126	62	8922	PRJNA717632	SAMN18499374	SRP312264	SRR14075634
25t_pBN_pPC_L_under300	8326	4433	4433	3212	1221	2781	1803	978	255	1578	358	174	73	410	PRJNA717632	SAMN18499375	SRP312264	SRR14075633
25t_pBN_pPN_L_over300	13272	11866	11866	10915	951	10754	10619	135	289	9690	77	193	189	9666	PRJNA717632	SAMN18499376	SRP312264	SRR14075632
25t_pBN_pPN_L_under300	118927	27014	27014	15156	11858	13289	10636	2653	776	6623	1701	446	442	6610	PRJNA717632	SAMN18499377	SRP312264	SRR14075631
26_pBC_pPC_L_over300	15013	14882	14882	14271	611	14175	14136	39	117	13979	7	88	38	13796	PRJNA717632	SAMN18499378	SRP312264	SRR14075630
26_pBC_pPN_L_over300	10000	9775	9775	9381	394	9330	9292	38	80	9241	4	74	74	9241	PRJNA717632	SAMN18499379	SRP312264	SRR14075629
26_pBN_pPC_L_over300	14946	14801	14801	14262	539	14083	13974	109	173	13890	62	131	64	13643	PRJNA717632	SAMN18499380	SRP312264	SRR14075628
26_pBN_pPN_L_over300	13708	13670	13670	13073	597	12883	12848	35	47	12842	3	43	43	12842	PRJNA717632	SAMN18499381	SRP312264	SRR14075627
26t_pBC_pPC_L_over300	13456	13409	13409	12321	1088	12201	12127	74	212	11945	28	158	68	11679	PRJNA717632	SAMN18499382	SRP312264	SRR14075626
26t_pBC_pPC_L_under300	40609	38648	38648	12811	25837	11985	10926	1059	269	10718	615	204	92	10345	PRJNA717632	SAMN18499383	SRP312264	SRR14075624
26t_pBC_pPN_L_over300	14808	13539	13539	11938	1601	10915	10543	372	203	10357	951	153	151	10355	PRJNA717632	SAMN18499384	SRP312264	SRR14075623
26t_pBC_pPN_L_under300	120506	31763	31763	13589	18174	11932	10153	1779	611	4777	1516	424	422	4771	PRJNA717632	SAMN18499385	SRP312264	SRR14075622
26t_pBN_pPC_L_over300	14900	14596	14596	13833	763	13713	13630	83	366	13324	36	296	173	13471	PRJNA717632	SAMN18499386	SRP312264	SRR14075621
26t_pBN_pPC_L_under300	70319	57264	57264	33381	23883	31479	27305	4174	789	26210	1512	589	235	24948	PRJNA717632	SAMN18499387	SRP312264	SRR14075620
26t_pBN_pPN_L_over300	10872	10489	10489	9801	688	9725	9657	68	165	9488	14	147	144	9471	PRJNA717632	SAMN18499388	SRP312264	SRR14075619
27_pBC_pPC_L_over300	10719	10673	10673	10174	499	10093	10072	21	108	9966	0	87	34	9789	PRJNA717632	SAMN18499389	SRP312264	SRR14075618
27_pBC_pPN_L_over300	14949	14031	14031	13459	572	11908	11309	599	146	11123	1453	118	118	11123	PRJNA717632	SAMN18499390	SRP312264	SRR14075617
27_pBN_pPC_L_over300	12696	12571	12571	11978	593	11809	11743	66	131	11659	42	99	50	11436	PRJNA717632	SAMN18499391	SRP312264	SRR14075616
27_pBN_pPN_L_over300	9362	9318	9318	8843	475	8739	8715	24	86	8649	12	31	27	8644	PRJNA717632	SAMN18499392	SRP312264	SRR14075615
27t_pBC_pPC_L_over300	13959	13890	13890	13248	642	13137	13077	60	138	12860	18	103	41	12659	PRJNA717632	SAMN18499393	SRP312264	SRR14075613
27t_pBC_pPN_L_over300	14371	13449	13449	12936	513	10536	9653	883	72	9639	2315	58	57	9638	PRJNA717632	SAMN18499394	SRP312264	SRR14075612
27t_pBN_pPC_L_over300	13788	13584	13584	13116	468	12935	12789	146	131	12202	51	99	45	11996	PRJNA717632	SAMN18499395	SRP312264	SRR14075611
27t_pBN_pPN_L_over300	9794	9358	9358	8923	435	8843	8684	159	85	7920	12	78	78	7920	PRJNA717632	SAMN18499396	SRP312264	SRR14075610
28_pBC_pPC_L_over300	14190	14136	14136	13652	484	13565	13526	39	113	13389	7	96	36	13192	PRJNA717632	SAMN18499397	SRP312264	SRR14075609
28_pBC_pPN_L_over300	14569	13676	13676	8375	5301	8284	8196	88	107	5717	30	83	82	5716	PRJNA717632	SAMN18499398	SRP312264	SRR14075608
28_pBC_pPN_L_under300	38099	7160	7160	2941	4219	2697	1472	1225	119	1056	187	86	86	1056	PRJNA717632	SAMN18499399	SRP312264	SRR14075607
28_pBN_pPC_L_over300	16131	16033	16033	15408	625	15349	15285	64	88	15178	7	66	25	14984	PRJNA717632	SAMN18499400	SRP312264	SRR14075606
28_pBN_pPN_L_over300	12582	12500	12500	11820	680	11716	11407	309	473	524	52	29	15	220	PRJNA717632	SAMN18499401	SRP312264	SRR14075605
29_pBC_pPC_L_over300	11786	11701	11701	10975	726	9074	8325	749	125	7523	1797	91	42	7402	PRJNA717632	SAMN18499402	SRP312264	SRR14075604
29_pBC_pPN_L_over300	12854	12305	12305	11692	613	11604	11452	152	179	9725	35	119	118	9715	PRJNA717632	SAMN18499403	SRP312264	SRR14075602
29_pBC_pPN_L_under300	27481	7223	7223	5498	1725	5388	3832	1556	274	1413	56	147	147	1413	PRJNA717632	SAMN18499404	SRP312264	SRR14075601
29_pBN_pPC_L_over300	14718	14518	14518	13927	591	13819	13753	66	133	12283	15	105	53	12510	PRJNA717632	SAMN18499405	SRP312264	SRR14075600
29_pBN_pPN_L_over300	13189	13060	13060	12462	598	12271	12247	24	200	12095	11	90	83	12084	PRJNA717632	SAMN18499406	SRP312264	SRR14075599
30_pBC_pPC_L_over300	16940	16882	16882	16262	620	16084	16031	53	477	8218	13	139	46	7726	PRJNA717632	SAMN18499407	SRP312264	SRR14075598
30_pBC_pPN_L_over300	19273	18208	18208	16255	1953	16121	15986	135	347	4160	9	74	58	1835	PRJNA717632	SAMN18499408	SRP312264	SRR14075597
30_pBC_pPN_L_under300	209997	27337	27337	21623	5714	20837	16346	4491	729	1112	236	103	97	987	PRJNA717632	SAMN18499409	SRP312264	SRR14075596
30_pBN_pPC_L_over300	18846	18712	18712	12843	5869	11817	7665	4152	100	7626	948	88	54	7403	PRJNA717632	SAMN18499410	SRP312264	SRR14075595
30_pBN_pPC_L_under300	39037	38792	38792	1254	37538	1029	335	694	49	326	156	42	20	282	PRJNA717632	SAMN18499411	SRP312264	SRR14075594
30_pBN_pPN_L_over300	16899	16354	16354	14842	1512	14700	14645	55	1326	1128	12	128	78	783	PRJNA717632	SAMN18499412	SRP312264	SRR14075593
30_pBN_pPN_L_under300	68886	37196	37196	21670	15526	17265	15181	2084	369	718	4143	19	15	713	PRJNA717632	SAMN18499413	SRP312264	SRR14075591
31_pBC_pPC_L_over300	17166	17050	17050	16392	658	16297	16250	47	137	3278	14	19	7	3229	PRJNA717632	SAMN18499414	SRP312264	SRR14075590
31_pBC_pPN_L	no result
31_pBN_pPC_L_over300	15095	15034	15034	14409	625	14269	14230	39	119	1008	16	19	10	869	PRJNA717632	SAMN18499415	SRP312264	SRR14075589
31_pBN_pPN_L_over300	15590	14548	14548	13149	1399	12655	12456	199	1381	641	407	130	72	361	PRJNA717632	SAMN18499416	SRP312264	SRR14075588
31_pBN_pPN_L_under300	57805	37457	37457	22263	15194	21663	21223	440	430	48	418	19	12	39	PRJNA717632	SAMN18499417	SRP312264	SRR14075587
32_pBC_pPC_L_over300	12018	11868	11868	11256	612	11153	11053	100	696	1774	21	94	28	93	PRJNA717632	SAMN18499418	SRP312264	SRR14075586
32_pBC_pPN_L_over300	16942	14825	14825	14232	593	14061	13884	177	691	1344	48	49	28	62	PRJNA717632	SAMN18499419	SRP312264	SRR14075585
32_pBN_pPC_L_over300	10938	10914	10914	10381	533	10110	9964	146	126	28	132	19	10	19	PRJNA717632	SAMN18499420	SRP312264	SRR14075584
32_pBN_pPN_L_over300	12855	12277	12277	11417	860	11272	11126	146	60	34	27	7	7	34	PRJNA717632	SAMN18499421	SRP312264	SRR14075583
32_pBN_pPN_L_under300	31756	11542	11542	3210	8332	2988	1873	1115	91	38	142	10	8	36	PRJNA717632	SAMN18499422	SRP312264	SRR14075582
empty_pBC_pPC_L_over300	11734	11714	11714	11165	549	11058	10986	72	167	10787	23	125	53	10581	PRJNA717632	SAMN18499423	SRP312264	SRR14075579
empty_pBC_pPC_L_under300	24235	18721	18721	11532	7189	10567	9344	1223	317	9127	811	235	88	10092	PRJNA717632	SAMN18499424	SRP312264	SRR14075578
empty_pBC_pPN_L_over300	12594	12399	12399	11275	1124	9589	8866	723	140	8774	1626	109	109	8774	PRJNA717632	SAMN18499425	SRP312264	SRR14075577
empty_pBN_pPC_L_over300	15563	15549	15549	15116	433	14946	14854	92	123	14754	88	94	39	14593	PRJNA717632	SAMN18499426	SRP312264	SRR14075576
empty_pBN_pPN_L_over300	12438	12342	12342	7054	5288	6982	6934	48	69	5919	33	44	44	5919	PRJNA717632	SAMN18499427	SRP312264	SRR14075575
empty_pBN_pPN_L_under300	33199	6931	6931	2206	4725	2089	928	1161	159	644	81	89	89	644	PRJNA717632	SAMN18499428	SRP312264	SRR14075574
total	4693465	3191299	3191299	2213355	977944	2091493	1985636	105857	53660	1367232	99787	19751	12657	1324575
pPC_L	2655346	2639369	2639369	2544817	94552	2494266	2477866	16400	42418	271809	3324	5575	417	27735	PRJNA717632	SAMN18499223	SRP312264	SRR14075693
pPN_L	2402299	2358766	2358766	2219770	138996	2155178	2133753	21425	44552	130181	6781	4002	781	68167	PRJNA717632	SAMN18499224	SRP312264	SRR14075692

## Sheet: Supplementary_Table_3
Supplementary Table 3. Y2H initial detected interactions
Bait_plasmid	Library	size	B35_Functionalgroup	B35_Functionalgroup2	B35ORF_function	B35ORF	Bt_Locus	Bt_symbol	Bt_Annotation	COG category	COG group	Read counts	Enrichment (normalized_reads)	Enrichment_category	Library enrichment (log10 of the total reads)	Location	Sample_reads	Empty_category	Promiscuity_factor
pBC	pPC_Library	over300	Gene regulation and genome replication	Cycle regulator	DNA binding/Mer-type regulator*	1	HBA75_22900	pheS	phenylalanine--tRNA ligase subunit alpha	J	Information storage and processing	16	0.132188	C	1	chromosome	12104	NO	2
pBC	pPC_Library	over300	Gene regulation and genome replication	Cycle regulator	DNA binding/Mer-type regulator*	1	HBA75_27930	GDPD	glycerophosphodiester phosphodiesterase	C	Metabolism	20	0.165235	C	1	chromosome	12104	B	6
pBC	pPN_Library	over300	Gene regulation and genome replication	Cycle regulator	DNA binding/Mer-type regulator*	1	HBA75_19390	ylbL	PDZ domain-containing protein	T	Cellular processes and signaling	1	0.0107285	C	1	chromosome	9321	C	1
pBC	pPN_Library	over300	Gene regulation and genome replication	Cycle regulator	DNA binding/Mer-type regulator*	1	HBA75_22900	pheS	phenylalanine--tRNA ligase subunit alpha	J	Information storage and processing	2	0.0214569	C	1	chromosome	9321	C	2
pBC	pPN_Library	over300	Gene regulation and genome replication	Cycle regulator	DNA binding/Mer-type regulator*	1	HBA75_25320	glpX	class II fructose-bisphosphatase	G	Metabolism	1	0.0107285	C	2	chromosome	9321	B	1
pBC	pPN_Library	over300	Gene regulation and genome replication	Cycle regulator	DNA binding/Mer-type regulator*	1	HBA75_25845	yjlC	DUF1641 domain-containing protein	S	Poorly characterized	5	0.0536423	C	3	chromosome	9321	C	2
pBC	pPN_Library	over300	Gene regulation and genome replication	Cycle regulator	DNA binding/Mer-type regulator*	1	HBA75_26395		phage tail family protein	S	Poorly characterized	8	0.0858277	C	2	chromosome	9321	C	2
pBC	pPN_Library	over300	Gene regulation and genome replication	Cycle regulator	DNA binding/Mer-type regulator*	1	HBA75_27025	licH	6-phospho-beta-glucosidase	G	Metabolism	8	0.0858277	C	2	chromosome	9321	B	3
pBN	pPN_Library	over300	Gene regulation and genome replication	Cycle regulator	DNA binding/Mer-type regulator*	1	HBA75_00735	rpsL	30S ribosomal protein S12	J	Information storage and processing	1474	12.5682	A	4	chromosome	11728	NO	1
pBN	pPN_Library	under300	Gene regulation and genome replication	Cycle regulator	DNA binding/Mer-type regulator*	1	HBA75_00735	rpsL	30S ribosomal protein S12	J	Information storage and processing	25	0.0369691	C	4	chromosome	67624	NO	1
pBN	pPN_Library	over300	Gene regulation and genome replication	Cycle regulator	DNA binding/Mer-type regulator*	1	HBA75_00745	fusA	elongation factor G	J	Information storage and processing	4	0.0341064	C	4	chromosome	11728	NO	10
pBN	pPN_Library	under300	Gene regulation and genome replication	Cycle regulator	DNA binding/Mer-type regulator*	1	HBA75_00745	fusA	elongation factor G	J	Information storage and processing	1	0.00147876	C	4	chromosome	67624	NO	10
pBN	pPN_Library	over300	Gene regulation and genome replication	Cycle regulator	DNA binding/Mer-type regulator*	1	HBA75_04560	yflP	tripartite tricarboxylate transporter substrate binding protein	S	Poorly characterized	1	0.0085266	C	3	chromosome	11728	NO	1
pBN	pPN_Library	over300	Gene regulation and genome replication	Cycle regulator	DNA binding/Mer-type regulator*	1	HBA75_06105	putP	sodium/proline symporter PutP	E	Metabolism	5	0.042633	C	4	chromosome	11728	NO	2
pBN	pPN_Library	under300	Gene regulation and genome replication	Cycle regulator	DNA binding/Mer-type regulator*	1	HBA75_06105	putP	sodium/proline symporter PutP	E	Metabolism	1	0.00147876	C	4	chromosome	67624	NO	2
pBN	pPN_Library	over300	Gene regulation and genome replication	Cycle regulator	DNA binding/Mer-type regulator*	1	HBA75_16385	tlyC	HlyC/CorC family transporter	S	Poorly characterized	1	0.0085266	C	2	chromosome	11728	NO	4
pBN	pPN_Library	over300	Gene regulation and genome replication	Cycle regulator	DNA binding/Mer-type regulator*	1	HBA75_26060		endopeptidase	M	Cellular processes and signaling	22	0.187585	C	4	chromosome	11728	NO	1
pBN	pPN_Library	under300	Gene regulation and genome replication	Cycle regulator	DNA binding/Mer-type regulator*	1	HBA75_26060		endopeptidase	M	Cellular processes and signaling	3	0.00443629	C	4	chromosome	67624	NO	1
pBN	pPN_Library	under300	Gene regulation and genome replication	Cycle regulator	DNA binding/Mer-type regulator*	1	HBA75_27790	mmgA	acetyl-CoA C-acetyltransferase	I	Metabolism	1	0.00147876	C	3	chromosome	67624	NO	2
pBN	pPN_Library	over300	Gene regulation and genome replication	Cycle regulator	DNA binding/Mer-type regulator*	1	HBA75_28270	lytS	two-component system sensor histidine kinase LytS	T	Cellular processes and signaling	8	0.0682128	C	3	chromosome	11728	NO	2
pBN	pPN_Library	over300	Gene regulation and genome replication	Cycle regulator	DNA binding/Mer-type regulator*	1	HBA75_29670	ltrA	group II intron reverse transcriptase/maturase	L	Information storage and processing	18	0.153479	C	4	pLUSID1	11728	NO	2
pBC	pPC_Library	over300	Gene regulation and genome replication	Cycle regulator	DNA binding/Mer-type regulator*	1	HBA75_01455	alr	alanine racemase	E	Metabolism	675	5.57667	B	1	chromosome	12104	B	30
pBN	pPC_Library	over300	Gene regulation and genome replication	Cycle regulator	DNA binding/Mer-type regulator*	1	HBA75_01455	alr	alanine racemase	E	Metabolism	23	0.17386	C	2	chromosome	13229	B	30
pBC	pPN_Library	over300	Gene regulation and genome replication	Cycle regulator	DNA binding/Mer-type regulator*	1	HBA75_01890	purH	bifunctional phosphoribosylaminoimidazolecarboxamide formyltransferase/IMP cyclohydrolase	F	Metabolism	1	0.0107285	C	2	chromosome	9321	NO
pBN	pPN_Library	over300	Gene regulation and genome replication	Cycle regulator	DNA binding/Mer-type regulator*	1	HBA75_02620	citH	CitMHS family transporter	C	Metabolism	12	0.102319	C	4	chromosome	11728	NO	10
pBN	pPN_Library	under300	Gene regulation and genome replication	Cycle regulator	DNA binding/Mer-type regulator*	1	HBA75_02620	citH	CitMHS family transporter	C	Metabolism	1	0.00147876	C	4	chromosome	67624	NO	10
pBN	pPN_Library	over300	Gene regulation and genome replication	Cycle regulator	DNA binding/Mer-type regulator*	1	HBA75_03035	alsT	alanine:cation symporter family protein	E	Metabolism	3	0.0255798	C	3	chromosome	11728	NO
pBN	pPN_Library	under300	Gene regulation and genome replication	Cycle regulator	DNA binding/Mer-type regulator*	1	HBA75_03035	alsT	alanine:cation symporter family protein	E	Metabolism	1	0.00147876	C	3	chromosome	67624	NO
pBN	pPN_Library	over300	Gene regulation and genome replication	Cycle regulator	DNA binding/Mer-type regulator*	1	HBA75_03420	pstS	phosphate ABC transporter substrate-binding protein PstS family protein	P	Metabolism	10	0.085266	C	2	chromosome	11728	NO
pBN	pPN_Library	under300	Gene regulation and genome replication	Cycle regulator	DNA binding/Mer-type regulator*	1	HBA75_03420	pstS	phosphate ABC transporter substrate-binding protein PstS family protein	P	Metabolism	8	0.0118301	C	2	chromosome	67624	NO
pBC	pPC_Library	over300	Gene regulation and genome replication	Cycle regulator	DNA binding/Mer-type regulator*	1	HBA75_03595	nrtA	ABC transporter substrate-binding protein	P	Metabolism	1284	10.6081	A	3	chromosome	12104	A	31
pBN	pPC_Library	over300	Gene regulation and genome replication	Cycle regulator	DNA binding/Mer-type regulator*	1	HBA75_03595	nrtA	ABC transporter substrate-binding protein	P	Metabolism	410	3.09925	B	3	chromosome	13229	A	31
pBC	pPN_Library	over300	Gene regulation and genome replication	Cycle regulator	DNA binding/Mer-type regulator*	1	HBA75_03615	thiG	thiazole synthase	H	Metabolism	4074	43.7078	A	2	chromosome	9321	A	25
pBN	pPN_Library	over300	Gene regulation and genome replication	Cycle regulator	DNA binding/Mer-type regulator*	1	HBA75_03615	thiG	thiazole synthase	H	Metabolism	29	0.247271	C	2	chromosome	11728	A	25
pBC	pPN_Library	over300	Gene regulation and genome replication	Cycle regulator	DNA binding/Mer-type regulator*	1	HBA75_31050	recA	recombinase RecA	L	Information storage and processing	23	0.246755	C	2	pLUSID3	9321	B	4
pBC	pPC_Library	over300	Gene regulation and genome replication	Cycle regulator	DNA binding/Mer-type regulator*	1	HBA75_03795		DUF3238 domain-containing protein	S	Poorly characterized	25	0.206543	C	1	chromosome	12104	C	12
pBN	pPC_Library	over300	Gene regulation and genome replication	Cycle regulator	DNA binding/Mer-type regulator*	1	HBA75_03795		DUF3238 domain-containing protein	S	Poorly characterized	5	0.0377958	C	1	chromosome	13229	C	12
pBN	pPN_Library	over300	Gene regulation and genome replication	Cycle regulator	DNA binding/Mer-type regulator*	1	HBA75_03795		DUF3238 domain-containing protein	S	Poorly characterized	9	0.0767394	C	2	chromosome	11728	C	12
pBN	pPN_Library	under300	Gene regulation and genome replication	Cycle regulator	DNA binding/Mer-type regulator*	1	HBA75_03795		DUF3238 domain-containing protein	S	Poorly characterized	5	0.00739382	C	2	chromosome	67624	C	12
pBN	pPN_Library	over300	Gene regulation and genome replication	Cycle regulator	DNA binding/Mer-type regulator*	1	HBA75_04390		ABC transporter permease	P	Metabolism	10	0.085266	C	4	chromosome	11728	NO
pBN	pPN_Library	over300	Gene regulation and genome replication	Cycle regulator	DNA binding/Mer-type regulator*	1	HBA75_04790	dhaK	dihydroxyacetone kinase subunit DhaK	G	Metabolism	2	0.0170532	C	2	chromosome	11728	NO
pBN	pPN_Library	over300	Gene regulation and genome replication	Cycle regulator	DNA binding/Mer-type regulator*	1	HBA75_05010		site-specific integrase	S	Poorly characterized	2	0.0170532	C	2	chromosome	11728	NO
pBN	pPN_Library	over300	Gene regulation and genome replication	Cycle regulator	DNA binding/Mer-type regulator*	1	HBA75_05430	cysW	sulfate ABC transporter permease subunit CysW	P	Metabolism	1	0.0085266	C	2	chromosome	11728	NO
pBC	pPC_Library	over300	Gene regulation and genome replication	Cycle regulator	DNA binding/Mer-type regulator*	1	HBA75_08260	fliM	flagellar motor switch protein FliM	N	Cellular processes and signaling	10	0.0826173	C	2	chromosome	12104	B	9
pBN	pPC_Library	over300	Gene regulation and genome replication	Cycle regulator	DNA binding/Mer-type regulator*	1	HBA75_08260	fliM	flagellar motor switch protein FliM	N	Cellular processes and signaling	1	0.00755915	C	2	chromosome	13229	NO	9
pBN	pPN_Library	over300	Gene regulation and genome replication	Cycle regulator	DNA binding/Mer-type regulator*	1	HBA75_08705	sfcA	oxaloacetate-decarboxylating malate dehydrogenase	C	Metabolism	2	0.0170532	C	3	chromosome	11728	NO
pBN	pPN_Library	under300	Gene regulation and genome replication	Cycle regulator	DNA binding/Mer-type regulator*	1	HBA75_08705	sfcA	oxaloacetate-decarboxylating malate dehydrogenase	C	Metabolism	1	0.00147876	C	3	chromosome	67624	NO
pBN	pPN_Library	over300	Gene regulation and genome replication	Cycle regulator	DNA binding/Mer-type regulator*	1	HBA75_09320	ycnJ	copper resistance protein	P	Metabolism	4	0.0341064	C	2	chromosome	11728	NO
pBN	pPN_Library	over300	Gene regulation and genome replication	Cycle regulator	DNA binding/Mer-type regulator*	1	HBA75_09375	ldh	L-lactate dehydrogenase	C	Metabolism	14	0.119372	C	2	chromosome	11728	NO
pBN	pPN_Library	under300	Gene regulation and genome replication	Cycle regulator	DNA binding/Mer-type regulator*	1	HBA75_09375	ldh	L-lactate dehydrogenase	C	Metabolism	3	0.00443629	C	2	chromosome	67624	NO
pBC	pPC_Library	over300	Gene regulation and genome replication	Cycle regulator	DNA binding/Mer-type regulator*	1	HBA75_11325	prpD	2-methylcitrate dehydratase	S	Poorly characterized	4	0.0330469	C	2	chromosome	12104	C	8
pBN	pPC_Library	over300	Gene regulation and genome replication	Cycle regulator	DNA binding/Mer-type regulator*	1	HBA75_11325	prpD	2-methylcitrate dehydratase	S	Poorly characterized	8	0.0604732	C	2	chromosome	13229	NO	8
pBC	pPC_Library	over300	Gene regulation and genome replication	Cycle regulator	DNA binding/Mer-type regulator*	1	HBA75_14510	aroC	chorismate synthase	E	Metabolism	1	0.00826173	C	1	chromosome	12104	C
pBC	pPC_Library	over300	Gene regulation and genome replication	Cycle regulator	DNA binding/Mer-type regulator*	1	HBA75_14680	proB	glutamate 5-kinase	E	Metabolism	18	0.148711	C	1	chromosome	12104	C	15
pBN	pPC_Library	over300	Gene regulation and genome replication	Cycle regulator	DNA binding/Mer-type regulator*	1	HBA75_14680	proB	glutamate 5-kinase	E	Metabolism	7	0.0529141	C	1	chromosome	13229	B	15
pBN	pPC_Library	over300	Gene regulation and genome replication	Cycle regulator	DNA binding/Mer-type regulator*	1	HBA75_15655		beta-lactamase family protein	V	Cellular processes and signaling	175	1.32285	B	2	chromosome	13229	NO	8
pBN	pPN_Library	over300	Gene regulation and genome replication	Cycle regulator	DNA binding/Mer-type regulator*	1	HBA75_16355		MFS transporter	G	Metabolism	3	0.0255798	C	3	chromosome	11728	NO
pBC	pPC_Library	over300	Gene regulation and genome replication	Cycle regulator	DNA binding/Mer-type regulator*	1	HBA75_18825	infB	translation initiation factor IF-2	J	Information storage and processing	2551	21.0757	A	2	chromosome	12104	B	24
pBN	pPC_Library	over300	Gene regulation and genome replication	Cycle regulator	DNA binding/Mer-type regulator*	1	HBA75_18825	infB	translation initiation factor IF-2	J	Information storage and processing	5	0.0377958	C	2	chromosome	13229	C	24
pBC	pPN_Library	over300	Gene regulation and genome replication	Cycle regulator	DNA binding/Mer-type regulator*	1	HBA75_18825	infB	translation initiation factor IF-2	J	Information storage and processing	135	1.44834	B	2	chromosome	9321	B	24
pBC	pPC_Library	over300	Gene regulation and genome replication	Cycle regulator	DNA binding/Mer-type regulator*	1	HBA75_18965	trmD	tRNA (guanosine(37)-N1)-methyltransferase TrmD	J	Information storage and processing	1	0.00826173	C	3	chromosome	12104	C	10
pBC	pPN_Library	over300	Gene regulation and genome replication	Cycle regulator	DNA binding/Mer-type regulator*	1	HBA75_19290	ftsZ	cell division protein FtsZ	D	Cellular processes and signaling	144	1.5449	B	2	chromosome	9321	B	24
pBN	pPN_Library	over300	Gene regulation and genome replication	Cycle regulator	DNA binding/Mer-type regulator*	1	HBA75_19290	ftsZ	cell division protein FtsZ	D	Cellular processes and signaling	173	1.4751	B	2	chromosome	11728	B	24
pBN	pPN_Library	under300	Gene regulation and genome replication	Cycle regulator	DNA binding/Mer-type regulator*	1	HBA75_19290	ftsZ	cell division protein FtsZ	D	Cellular processes and signaling	248	0.366734	B	2	chromosome	67624	B	24
pBC	pPC_Library	over300	Gene regulation and genome replication	Cycle regulator	DNA binding/Mer-type regulator*	1	HBA75_19295	ftsA	cell division protein FtsA	D	Cellular processes and signaling	1329	10.9798	A	3	chromosome	12104	A	31
pBN	pPC_Library	over300	Gene regulation and genome replication	Cycle regulator	DNA binding/Mer-type regulator*	1	HBA75_19295	ftsA	cell division protein FtsA	D	Cellular processes and signaling	1	0.00755915	C	3	chromosome	13229	C	31
pBC	pPN_Library	over300	Gene regulation and genome replication	Cycle regulator	DNA binding/Mer-type regulator*	1	HBA75_19295	ftsA	cell division protein FtsA	D	Cellular processes and signaling	9	0.0965562	C	3	chromosome	9321	B	31
pBN	pPN_Library	over300	Gene regulation and genome replication	Cycle regulator	DNA binding/Mer-type regulator*	1	HBA75_19625	pdhA	pyruvate dehydrogenase E1 component subunit alpha	C	Metabolism	1	0.0085266	C	3	chromosome	11728	NO
pBN	pPN_Library	over300	Gene regulation and genome replication	Cycle regulator	DNA binding/Mer-type regulator*	1	HBA75_20185	spoIIAB	anti-sigma F factor	F	Metabolism	2	0.0170532	C	3	chromosome	11728	NO
pBN	pPN_Library	under300	Gene regulation and genome replication	Cycle regulator	DNA binding/Mer-type regulator*	1	HBA75_20185	spoIIAB	anti-sigma F factor	F	Metabolism	1	0.00147876	C	3	chromosome	67624	NO
pBC	pPN_Library	over300	Gene regulation and genome replication	Cycle regulator	DNA binding/Mer-type regulator*	1	HBA75_20835	yqhT	Xaa-Pro dipeptidase	E	Metabolism	114	1.22304	B	2	chromosome	9321	B	18
pBN	pPN_Library	over300	Gene regulation and genome replication	Cycle regulator	DNA binding/Mer-type regulator*	1	HBA75_22670	sdhB	succinate dehydrogenase iron-sulfur subunit	C	Metabolism	6	0.0511596	C	2	chromosome	11728	NO
pBN	pPN_Library	under300	Gene regulation and genome replication	Cycle regulator	DNA binding/Mer-type regulator*	1	HBA75_22670	sdhB	succinate dehydrogenase iron-sulfur subunit	C	Metabolism	4	0.00591506	C	2	chromosome	67624	NO
pBN	pPN_Library	over300	Gene regulation and genome replication	Cycle regulator	DNA binding/Mer-type regulator*	1	HBA75_22715	fadR	TetR family transcriptional regulator	K	Information storage and processing	1	0.0085266	C	2	chromosome	11728	NO
pBN	pPN_Library	over300	Gene regulation and genome replication	Cycle regulator	DNA binding/Mer-type regulator*	1	HBA75_22720	lcfA	long-chain-fatty-acid--CoA ligase	I	Metabolism	8	0.0682128	C	3	chromosome	11728	NO
pBN	pPN_Library	under300	Gene regulation and genome replication	Cycle regulator	DNA binding/Mer-type regulator*	1	HBA75_22720	lcfA	long-chain-fatty-acid--CoA ligase	I	Metabolism	3	0.00443629	C	3	chromosome	67624	NO
pBC	pPC_Library	over300	Gene regulation and genome replication	Cycle regulator	DNA binding/Mer-type regulator*	1	HBA75_22945	ysdC	M42 family metallopeptidase	G	Metabolism	1238	10.228	A	3	chromosome	12104	A	34
pBN	pPC_Library	over300	Gene regulation and genome replication	Cycle regulator	DNA binding/Mer-type regulator*	1	HBA75_22945	ysdC	M42 family metallopeptidase	G	Metabolism	32	0.241893	C	3	chromosome	13229	A	34
pBC	pPN_Library	over300	Gene regulation and genome replication	Cycle regulator	DNA binding/Mer-type regulator*	1	HBA75_22945	ysdC	M42 family metallopeptidase	G	Metabolism	969	10.3959	A	3	chromosome	9321	A	34
pBN	pPN_Library	over300	Gene regulation and genome replication	Cycle regulator	DNA binding/Mer-type regulator*	1	HBA75_22945	ysdC	M42 family metallopeptidase	G	Metabolism	13	0.110846	C	3	chromosome	11728	B	34
pBN	pPN_Library	under300	Gene regulation and genome replication	Cycle regulator	DNA binding/Mer-type regulator*	1	HBA75_22945	ysdC	M42 family metallopeptidase	G	Metabolism	1	0.00147876	C	3	chromosome	67624	B	34
pBN	pPN_Library	over300	Gene regulation and genome replication	Cycle regulator	DNA binding/Mer-type regulator*	1	HBA75_23000	dnaB	Replication initiation and membrane attachment protein	L	Information storage and processing	1	0.0085266	C	3	chromosome	11728	NO
pBC	pPC_Library	over300	Gene regulation and genome replication	Cycle regulator	DNA binding/Mer-type regulator*	1	HBA75_23085	pyk	pyruvate kinase	G	Metabolism	434	3.58559	B	3	chromosome	12104	B	26
pBN	pPC_Library	over300	Gene regulation and genome replication	Cycle regulator	DNA binding/Mer-type regulator*	1	HBA75_23085	pyk	pyruvate kinase	G	Metabolism	2	0.0151183	C	3	chromosome	13229	C	26
pBN	pPN_Library	over300	Gene regulation and genome replication	Cycle regulator	DNA binding/Mer-type regulator*	1	HBA75_23085	pyk	pyruvate kinase	G	Metabolism	4	0.0341064	C	3	chromosome	11728	NO	26
pBC	pPC_Library	over300	Gene regulation and genome replication	Cycle regulator	DNA binding/Mer-type regulator*	1	HBA75_23625	pepV	dipeptidase PepV	E	Metabolism	620	5.12227	B	2	chromosome	12104	B	29
pBN	pPC_Library	over300	Gene regulation and genome replication	Cycle regulator	DNA binding/Mer-type regulator*	1	HBA75_23625	pepV	dipeptidase PepV	E	Metabolism	2	0.0151183	C	2	chromosome	13229	C	29
pBC	pPN_Library	over300	Gene regulation and genome replication	Cycle regulator	DNA binding/Mer-type regulator*	1	HBA75_23625	pepV	dipeptidase PepV	E	Metabolism	330	3.54039	B	2	chromosome	9321	B	29
pBN	pPN_Library	over300	Gene regulation and genome replication	Cycle regulator	DNA binding/Mer-type regulator*	1	HBA75_23965		hypothetical protein	S	Poorly characterized	4	0.0341064	C	2	chromosome	11728	NO
pBN	pPN_Library	under300	Gene regulation and genome replication	Cycle regulator	DNA binding/Mer-type regulator*	1	HBA75_23965		hypothetical protein	S	Poorly characterized	1	0.00147876	C	2	chromosome	67624	NO
pBN	pPN_Library	under300	Gene regulation and genome replication	Cycle regulator	DNA binding/Mer-type regulator*	1	HBA75_25205		hypothetical protein	NO		1	0.00147876	C		chromosome	67624	NO
pBN	pPN_Library	under300	Gene regulation and genome replication	Cycle regulator	DNA binding/Mer-type regulator*	1	HBA75_27185	opuD	glycine betaine transporter OpuD	M	Cellular processes and signaling	1	0.00147876	C		chromosome	67624	NO
pBN	pPN_Library	over300	Gene regulation and genome replication	Cycle regulator	DNA binding/Mer-type regulator*	1	HBA75_27225	ywqB	hypothetical protein	S	Poorly characterized	4	0.0341064	C	1	chromosome	11728	NO
pBN	pPN_Library	under300	Gene regulation and genome replication	Cycle regulator	DNA binding/Mer-type regulator*	1	HBA75_27225	ywqB	hypothetical protein	S	Poorly characterized	1	0.00147876	C	1	chromosome	67624	NO
pBN	pPN_Library	under300	Gene regulation and genome replication	Cycle regulator	DNA binding/Mer-type regulator*	1	HBA75_27660	rpiB	ribose 5-phosphate isomerase B	G	Metabolism	2	0.00295753	C	4	chromosome	67624	NO
pBN	pPN_Library	over300	Gene regulation and genome replication	Cycle regulator	DNA binding/Mer-type regulator*	1	HBA75_27735	glpX	class II fructose-bisphosphatase	G	Metabolism	1	0.0085266	C	3	chromosome	11728	NO
pBN	pPN_Library	over300	Gene regulation and genome replication	Cycle regulator	DNA binding/Mer-type regulator*	1	HBA75_29725		hypothetical protein	NO		14	0.119372	C	3	pLUSID1	11728	NO
pBN	pPN_Library	under300	Gene regulation and genome replication	Cycle regulator	DNA binding/Mer-type regulator*	1	HBA75_29725		hypothetical protein	NO		1	0.00147876	C	3	pLUSID1	67624	NO
pBN	pPN_Library	over300	Gene regulation and genome replication	Cycle regulator	DNA binding/Mer-type regulator*	1	HBA75_30400	fhuG	iron ABC transporter permease	P	Metabolism	1	0.0085266	C	3	pLUSID2	11728	NO
pBC	pPN_Library	over300	Gene regulation and genome replication	Cycle regulator	DNA binding/Mer-type regulator*	1	HBA75_30425	ahpF	alkyl hydroperoxide reductase subunit F	O	Cellular processes and signaling	575	6.16887	B	3	pLUSID2	9321	B	20
pBC	pPC_Library	over300	Gene regulation and genome replication	Cycle regulator	DNA binding/Mer-type regulator*	1	HBA75_30450		dipeptide epimerase	M	Cellular processes and signaling	1604	13.2518	A	3	pLUSID2	12104	A	31
pBN	pPC_Library	over300	Gene regulation and genome replication	Cycle regulator	DNA binding/Mer-type regulator*	1	HBA75_30450		dipeptide epimerase	M	Cellular processes and signaling	11509	86.9983	A	3	pLUSID2	13229	A	31
pBC	pPN_Library	over300	Gene regulation and genome replication	Cycle regulator	DNA binding/Mer-type regulator*	1	HBA75_30450		dipeptide epimerase	M	Cellular processes and signaling	3	0.0321854	C	3	pLUSID2	9321	B	31
pBC	pPC_Library	over300	Gene regulation and genome replication	Cycle regulator	DNA binding/Mer-type regulator*	1	HBA75_30635		IS110 family transposase	L	Information storage and processing	1	0.00826173	C	4	pLUSID2	12104	NO	9
pBN	pPN_Library	over300	Gene regulation and genome replication	Cycle regulator	DNA binding/Mer-type regulator*	1	HBA75_30635		IS110 family transposase	L	Information storage and processing	1	0.0085266	C	4	pLUSID2	11728	NO	9
pBC	pPC_Library	over300	Gene regulation and genome replication	Cycle regulator	DNA binding/Mer-type regulator*	1	HBA75_30720		IS4 family transposase	L	Information storage and processing	1398	11.5499	A	3	pLUSID2	12104	B	29
pBC	pPN_Library	over300	Gene regulation and genome replication	Cycle regulator	DNA binding/Mer-type regulator*	1	HBA75_30720		IS4 family transposase	L	Information storage and processing	35	0.375496	B	3	pLUSID2	9321	B	29
pBN	pPN_Library	over300	Gene regulation and genome replication	Cycle regulator	DNA binding/Mer-type regulator*	1	HBA75_30720		IS4 family transposase	L	Information storage and processing	1	0.0085266	C	3	pLUSID2	11728	NO	29
pBC	pPC_Library	over300	Gene regulation and genome replication	DNA Replication	SSB	2	HBA75_11115	atoD	acetate CoA-transferase subunit alpha	I	Metabolism	28	0.262295	B	2	chromosome	10675	C	1
pBC	pPC_Library	over300	Gene regulation and genome replication	DNA Replication	SSB	2	HBA75_22900	pheS	phenylalanine--tRNA ligase subunit alpha	J	Information storage and processing	1	0.00936768	C	1	chromosome	10675	NO	2
pBC	pPC_Library	over300	Gene regulation and genome replication	DNA Replication	SSB	2	HBA75_27930	GDPD	glycerophosphodiester phosphodiesterase	C	Metabolism	49	0.459016	B	1	chromosome	10675	B	6
pBC	pPC_Library	over300	Gene regulation and genome replication	DNA Replication	SSB	2	HBA75_30675	fumB	class I fumarate hydratase	C	Metabolism	1	0.00936768	C	2	pLUSID2	10675	C	4
pBC	pPN_Library	over300	Gene regulation and genome replication	DNA Replication	SSB	2	HBA75_19390	ylbL	PDZ domain-containing protein	T	Cellular processes and signaling	2	0.0158894	C	1	chromosome	12587	C	1
pBC	pPN_Library	over300	Gene regulation and genome replication	DNA Replication	SSB	2	HBA75_22900	pheS	phenylalanine--tRNA ligase subunit alpha	J	Information storage and processing	11	0.0873918	C	1	chromosome	12587	C	2
pBC	pPN_Library	over300	Gene regulation and genome replication	DNA Replication	SSB	2	HBA75_23510	ampS	aminopeptidase	E	Metabolism	7	0.0556129	C	2	chromosome	12587	C	4
pBC	pPN_Library	over300	Gene regulation and genome replication	DNA Replication	SSB	2	HBA75_25320	glpX	class II fructose-bisphosphatase	G	Metabolism	1	0.0079447	C	2	chromosome	12587	B	1
pBC	pPN_Library	over300	Gene regulation and genome replication	DNA Replication	SSB	2	HBA75_26395		phage tail family protein	S	Poorly characterized	7	0.0556129	C	2	chromosome	12587	C	2
pBC	pPN_Library	over300	Gene regulation and genome replication	DNA Replication	SSB	2	HBA75_27025	licH	6-phospho-beta-glucosidase	G	Metabolism	4	0.0317788	C	2	chromosome	12587	B	3
pBN	pPN_Library	over300	Gene regulation and genome replication	DNA Replication	SSB	2	HBA75_12045	pepD	beta-Ala-His dipeptidase	E	Metabolism	1	0.00837311	C	2	chromosome	11943	NO	4
pBN	pPN_Library	over300	Gene regulation and genome replication	DNA Replication	SSB	2	HBA75_19105	priA	primosomal protein N'	L	Information storage and processing	48	0.401909	B	1	chromosome	11943	NO	1
pBN	pPN_Library	over300	Gene regulation and genome replication	DNA Replication	SSB	2	HBA75_19390	ylbL	PDZ domain-containing protein	T	Cellular processes and signaling	11	0.0921042	C	1	chromosome	11943	B	1
pBC	pPC_Library	over300	Gene regulation and genome replication	DNA Replication	SSB	2	HBA75_01455	alr	alanine racemase	E	Metabolism	244	2.28571	B	2	chromosome	10675	B	30
pBN	pPC_Library	over300	Gene regulation and genome replication	DNA Replication	SSB	2	HBA75_01455	alr	alanine racemase	E	Metabolism	1388	9.62752	B	2	chromosome	14417	B	30
pBC	pPC_Library	over300	Gene regulation and genome replication	DNA Replication	SSB	2	HBA75_03595	nrtA	ABC transporter substrate-binding protein	P	Metabolism	1001	9.37705	B	3	chromosome	10675	A	31
pBN	pPC_Library	over300	Gene regulation and genome replication	DNA Replication	SSB	2	HBA75_03595	nrtA	ABC transporter substrate-binding protein	P	Metabolism	3462	24.0133	A	3	chromosome	14417	A	31
pBC	pPN_Library	over300	Gene regulation and genome replication	DNA Replication	SSB	2	HBA75_03615	thiG	thiazole synthase	H	Metabolism	4468	35.4969	A	2	chromosome	12587	A	25
pBN	pPN_Library	over300	Gene regulation and genome replication	DNA Replication	SSB	2	HBA75_03615	thiG	thiazole synthase	H	Metabolism	4043	33.8525	A	2	chromosome	11943	A	25
pBC	pPC_Library	over300	Gene regulation and genome replication	DNA Replication	SSB	2	HBA75_03795		DUF3238 domain-containing protein	S	Poorly characterized	14	0.131148	C	1	chromosome	10675	C	12
pBN	pPC_Library	over300	Gene regulation and genome replication	DNA Replication	SSB	2	HBA75_03795		DUF3238 domain-containing protein	S	Poorly characterized	148	1.02657	B	1	chromosome	14417	C	12
pBC	pPN_Library	over300	Gene regulation and genome replication	DNA Replication	SSB	2	HBA75_31050	recA	recombinase RecA	L	Information storage and processing	26	0.206562	C	2	pLUSID3	12587	B	4
pBC	pPC_Library	over300	Gene regulation and genome replication	DNA Replication	SSB	2	HBA75_04365		methyltransferase	L	Information storage and processing	1	0.00936768	C	3	chromosome	10675	NO	11
pBC	pPN_Library	over300	Gene regulation and genome replication	DNA Replication	SSB	2	HBA75_07470	aroC	chorismate synthase	E	Metabolism	1	0.0079447	C	1	chromosome	12587	C
pBC	pPC_Library	over300	Gene regulation and genome replication	DNA Replication	SSB	2	HBA75_08260	fliM	flagellar motor switch protein FliM	N	Cellular processes and signaling	31	0.290398	B	2	chromosome	10675	B	9
pBC	pPC_Library	over300	Gene regulation and genome replication	DNA Replication	SSB	2	HBA75_14680	proB	glutamate 5-kinase	E	Metabolism	50	0.468384	B	1	chromosome	10675	C	15
pBN	pPC_Library	over300	Gene regulation and genome replication	DNA Replication	SSB	2	HBA75_14680	proB	glutamate 5-kinase	E	Metabolism	495	3.43345	B	1	chromosome	14417	B	15
pBC	pPC_Library	over300	Gene regulation and genome replication	DNA Replication	SSB	2	HBA75_15655		beta-lactamase family protein	V	Cellular processes and signaling	1	0.00936768	C	2	chromosome	10675	NO	8
pBC	pPN_Library	over300	Gene regulation and genome replication	DNA Replication	SSB	2	HBA75_17615	fdhA	formate dehydrogenase subunit alpha	C	Metabolism	1	0.0079447	C	1	chromosome	12587	C
pBC	pPC_Library	over300	Gene regulation and genome replication	DNA Replication	SSB	2	HBA75_18825	infB	translation initiation factor IF-2	J	Information storage and processing	408	3.82201	B	2	chromosome	10675	B	24
pBN	pPC_Library	over300	Gene regulation and genome replication	DNA Replication	SSB	2	HBA75_18825	infB	translation initiation factor IF-2	J	Information storage and processing	4	0.027745	C	2	chromosome	14417	C	24
pBC	pPN_Library	over300	Gene regulation and genome replication	DNA Replication	SSB	2	HBA75_18825	infB	translation initiation factor IF-2	J	Information storage and processing	22	0.174784	C	2	chromosome	12587	B	24
pBC	pPN_Library	over300	Gene regulation and genome replication	DNA Replication	SSB	2	HBA75_19180	pyrD	dihydroorotate oxidase B catalytic subunit	F	Metabolism	7	0.0556129	C	2	chromosome	12587	C
pBN	pPN_Library	over300	Gene regulation and genome replication	DNA Replication	SSB	2	HBA75_19290	ftsZ	cell division protein FtsZ	D	Cellular processes and signaling	304	2.54542	B	2	chromosome	11943	B	24
pBC	pPC_Library	over300	Gene regulation and genome replication	DNA Replication	SSB	2	HBA75_19295	ftsA	cell division protein FtsA	D	Cellular processes and signaling	1225	11.4754	A	3	chromosome	10675	A	31
pBN	pPC_Library	over300	Gene regulation and genome replication	DNA Replication	SSB	2	HBA75_19295	ftsA	cell division protein FtsA	D	Cellular processes and signaling	70	0.485538	B	3	chromosome	14417	C	31
pBC	pPN_Library	over300	Gene regulation and genome replication	DNA Replication	SSB	2	HBA75_19295	ftsA	cell division protein FtsA	D	Cellular processes and signaling	6	0.0476682	C	3	chromosome	12587	B	31
pBC	pPN_Library	over300	Gene regulation and genome replication	DNA Replication	SSB	2	HBA75_20835	yqhT	Xaa-Pro dipeptidase	E	Metabolism	272	2.16096	B	2	chromosome	12587	B	18
pBN	pPN_Library	over300	Gene regulation and genome replication	DNA Replication	SSB	2	HBA75_20835	yqhT	Xaa-Pro dipeptidase	E	Metabolism	1	0.00837311	C	2	chromosome	11943	NO	18
pBN	pPC_Library	over300	Gene regulation and genome replication	DNA Replication	SSB	2	HBA75_21125	metB	cystathionine gamma-synthase/O-acetylhomoserine thiolyase	E	Metabolism	1	0.00693626	C	2	chromosome	14417	NO	8
pBC	pPC_Library	over300	Gene regulation and genome replication	DNA Replication	SSB	2	HBA75_21275	nfo	deoxyribonuclease IV	L	Information storage and processing	5	0.0468384	C	2	chromosome	10675	C
pBC	pPC_Library	over300	Gene regulation and genome replication	DNA Replication	SSB	2	HBA75_22945	ysdC	M42 family metallopeptidase	G	Metabolism	1413	13.2365	A	3	chromosome	10675	A	34
pBN	pPC_Library	over300	Gene regulation and genome replication	DNA Replication	SSB	2	HBA75_22945	ysdC	M42 family metallopeptidase	G	Metabolism	1629	11.2992	A	3	chromosome	14417	A	34
pBC	pPN_Library	over300	Gene regulation and genome replication	DNA Replication	SSB	2	HBA75_22945	ysdC	M42 family metallopeptidase	G	Metabolism	3736	29.6814	A	3	chromosome	12587	A	34
pBN	pPN_Library	over300	Gene regulation and genome replication	DNA Replication	SSB	2	HBA75_22945	ysdC	M42 family metallopeptidase	G	Metabolism	1805	15.1135	A	3	chromosome	11943	B	34
pBC	pPC_Library	over300	Gene regulation and genome replication	DNA Replication	SSB	2	HBA75_23085	pyk	pyruvate kinase	G	Metabolism	270	2.52927	B	3	chromosome	10675	B	26
pBN	pPC_Library	over300	Gene regulation and genome replication	DNA Replication	SSB	2	HBA75_23085	pyk	pyruvate kinase	G	Metabolism	1	0.00693626	C	3	chromosome	14417	C	26
pBC	pPC_Library	over300	Gene regulation and genome replication	DNA Replication	SSB	2	HBA75_23535	pncB	nicotinate phosphoribosyltransferase	H	Metabolism	1	0.00936768	C	2	chromosome	10675	NO	8
pBC	pPC_Library	over300	Gene regulation and genome replication	DNA Replication	SSB	2	HBA75_23625	pepV	dipeptidase PepV	E	Metabolism	825	7.72834	B	2	chromosome	10675	B	29
pBC	pPN_Library	over300	Gene regulation and genome replication	DNA Replication	SSB	2	HBA75_23625	pepV	dipeptidase PepV	E	Metabolism	335	2.66148	B	2	chromosome	12587	B	29
pBC	pPC_Library	over300	Gene regulation and genome replication	DNA Replication	SSB	2	HBA75_26775	ybhK	YvcK family protein	S	Poorly characterized	1	0.00936768	C	1	chromosome	10675	NO
pBC	pPN_Library	over300	Gene regulation and genome replication	DNA Replication	SSB	2	HBA75_30425	ahpF	alkyl hydroperoxide reductase subunit F	O	Cellular processes and signaling	99	0.786526	B	3	pLUSID2	12587	B	20
pBN	pPN_Library	over300	Gene regulation and genome replication	DNA Replication	SSB	2	HBA75_30425	ahpF	alkyl hydroperoxide reductase subunit F	O	Cellular processes and signaling	11	0.0921042	C	3	pLUSID2	11943	C	20
pBC	pPC_Library	over300	Gene regulation and genome replication	DNA Replication	SSB	2	HBA75_30450		dipeptide epimerase	M	Cellular processes and signaling	3327	31.1663	A	3	pLUSID2	10675	A	31
pBN	pPC_Library	over300	Gene regulation and genome replication	DNA Replication	SSB	2	HBA75_30450		dipeptide epimerase	M	Cellular processes and signaling	5594	38.8014	A	3	pLUSID2	14417	A	31
pBC	pPN_Library	over300	Gene regulation and genome replication	DNA Replication	SSB	2	HBA75_30450		dipeptide epimerase	M	Cellular processes and signaling	62	0.492572	B	3	pLUSID2	12587	B	31
pBC	pPC_Library	over300	Gene regulation and genome replication	DNA Replication	SSB	2	HBA75_30720		IS4 family transposase	L	Information storage and processing	773	7.24122	B	3	pLUSID2	10675	B	29
pBN	pPC_Library	over300	Gene regulation and genome replication	DNA Replication	SSB	2	HBA75_30720		IS4 family transposase	L	Information storage and processing	182	1.2624	B	3	pLUSID2	14417	B	29
pBC	pPN_Library	over300	Gene regulation and genome replication	DNA Replication	SSB	2	HBA75_30720		IS4 family transposase	L	Information storage and processing	60	0.476682	B	3	pLUSID2	12587	B	29
pBN	pPC_Library	over300	Gene regulation and genome replication	Unknown	Unknown	3	HBA75_00375	prs	ribose-phosphate diphosphokinase	F	Metabolism	20	0.182532	C	2	chromosome	10957	NO
pBN	pPC_Library	under300	Gene regulation and genome replication	Unknown	Unknown	3	HBA75_00375	prs	ribose-phosphate diphosphokinase	F	Metabolism	23	0.117001	C	2	chromosome	19658	NO
pBN	pPC_Library	over300	Gene regulation and genome replication	Unknown	Unknown	3	HBA75_00715	rsmC	class I SAM-dependent methyltransferase	J	Information storage and processing	1	0.00912659	C	2	chromosome	10957	NO
pBN	pPC_Library	over300	Gene regulation and genome replication	Unknown	Unknown	3	HBA75_00145	guaB	IMP dehydrogenase	F	Metabolism	255	2.32728	B	1	chromosome	10957	NO	2
pBN	pPC_Library	under300	Gene regulation and genome replication	Unknown	Unknown	3	HBA75_00145	guaB	IMP dehydrogenase	F	Metabolism	25	0.127175	C	1	chromosome	19658	NO	2
pBN	pPC_Library	over300	Gene regulation and genome replication	Unknown	Unknown	3	HBA75_01870	purL	phosphoribosylformylglycinamidine synthase II	F	Metabolism	3	0.0273798	C	2	chromosome	10957	NO	5
pBN	pPC_Library	over300	Gene regulation and genome replication	Unknown	Unknown	3	HBA75_02235	pbpX	beta-lactamase family protein	V	Cellular processes and signaling	1957	17.8607	A	3	chromosome	10957	NO	4
pBN	pPC_Library	under300	Gene regulation and genome replication	Unknown	Unknown	3	HBA75_02235	pbpX	beta-lactamase family protein	V	Cellular processes and signaling	58	0.295045	B	3	chromosome	19658	NO	4
pBN	pPC_Library	over300	Gene regulation and genome replication	Unknown	Unknown	3	HBA75_05440	wapA	DNRLRE domain-containing protein	M	Cellular processes and signaling	2	0.0182532	C	2	chromosome	10957	NO	1
pBN	pPC_Library	under300	Gene regulation and genome replication	Unknown	Unknown	3	HBA75_05440	wapA	DNRLRE domain-containing protein	M	Cellular processes and signaling	1	0.00508699	C	2	chromosome	19658	NO	1
pBN	pPC_Library	under300	Gene regulation and genome replication	Unknown	Unknown	3	HBA75_05625	addA	helicase-exonuclease AddAB subunit AddA	L	Information storage and processing	1	0.00508699	C	1	chromosome	19658	NO	1
pBN	pPC_Library	over300	Gene regulation and genome replication	Unknown	Unknown	3	HBA75_08385	phnT	ABC transporter ATP-binding protein	P	Metabolism	3	0.0273798	C	2	chromosome	10957	NO	6
pBN	pPC_Library	under300	Gene regulation and genome replication	Unknown	Unknown	3	HBA75_08385	phnT	ABC transporter ATP-binding protein	P	Metabolism	2	0.010174	C	2	chromosome	19658	NO	6
pBN	pPC_Library	over300	Gene regulation and genome replication	Unknown	Unknown	3	HBA75_01455	alr	alanine racemase	E	Metabolism	43	0.392443	B	2	chromosome	10957	B	30
pBN	pPC_Library	over300	Gene regulation and genome replication	Unknown	Unknown	3	HBA75_11115	atoD	acetate CoA-transferase subunit alpha	I	Metabolism	8	0.0730127	C	2	chromosome	10957	NO	1
pBN	pPC_Library	under300	Gene regulation and genome replication	Unknown	Unknown	3	HBA75_01455	alr	alanine racemase	E	Metabolism	3558	18.0995	A	2	chromosome	19658	B	30
pBN	pPC_Library	over300	Gene regulation and genome replication	Unknown	Unknown	3	HBA75_25540	fadM	proline dehydrogenase	E	Metabolism	3	0.0273798	C	2	chromosome	10957	NO	1
pBN	pPC_Library	under300	Gene regulation and genome replication	Unknown	Unknown	3	HBA75_26415		phage tail protein	S	Poorly characterized	7	0.0356089	C	1	chromosome	19658	NO	2
pBN	pPC_Library	under300	Gene regulation and genome replication	Unknown	Unknown	3	HBA75_30510		phage tail family protein	S	Poorly characterized	2	0.010174	C		pLUSID2	19658	NO	6
pBN	pPC_Library	over300	Gene regulation and genome replication	Unknown	Unknown	3	HBA75_02890	aspA	aspartate ammonia-lyase	E	Metabolism	1	0.00912659	C	3	chromosome	10957	C	10
pBN	pPC_Library	over300	Gene regulation and genome replication	Unknown	Unknown	3	HBA75_03595	nrtA	ABC transporter substrate-binding protein	P	Metabolism	796	7.26476	B	3	chromosome	10957	A	31
pBN	pPC_Library	under300	Gene regulation and genome replication	Unknown	Unknown	3	HBA75_03595	nrtA	ABC transporter substrate-binding protein	P	Metabolism	405	2.06023	B	3	chromosome	19658	A	31
pBN	pPN_Library	over300	Gene regulation and genome replication	Unknown	Unknown	3	HBA75_03615	thiG	thiazole synthase	H	Metabolism	3	0.018379	C	2	chromosome	16323	A	25
pBN	pPC_Library	over300	Gene regulation and genome replication	Unknown	Unknown	3	HBA75_03795		DUF3238 domain-containing protein	S	Poorly characterized	2	0.0182532	C	1	chromosome	10957	C	12
pBN	pPC_Library	under300	Gene regulation and genome replication	Unknown	Unknown	3	HBA75_03795		DUF3238 domain-containing protein	S	Poorly characterized	2	0.010174	C	1	chromosome	19658	C	12
pBC	pPC_Library	over300	Gene regulation and genome replication	Unknown	Unknown	3	HBA75_04365		methyltransferase	L	Information storage and processing	3460	40.2139	A	3	chromosome	8604	NO	11
pBN	pPC_Library	over300	Gene regulation and genome replication	Unknown	Unknown	3	HBA75_04365		methyltransferase	L	Information storage and processing	1	0.00912659	C	3	chromosome	10957	NO	11
pBN	pPN_Library	over300	Gene regulation and genome replication	Unknown	Unknown	3	HBA75_04365		methyltransferase	L	Information storage and processing	1	0.00612632	C	3	chromosome	16323	NO	11
pBN	pPC_Library	over300	Gene regulation and genome replication	Unknown	Unknown	3	HBA75_04720		alpha/beta fold hydrolase	G	Metabolism	4673	42.6485	A	3	chromosome	10957	NO	11
pBN	pPC_Library	under300	Gene regulation and genome replication	Unknown	Unknown	3	HBA75_04720		alpha/beta fold hydrolase	G	Metabolism	50	0.254349	B	3	chromosome	19658	NO	11
pBN	pPC_Library	over300	Gene regulation and genome replication	Unknown	Unknown	3	HBA75_06635	nrdE	class 1b ribonucleoside-diphosphate reductase subunit alpha	F	Metabolism	19	0.173405	C	2	chromosome	10957	NO
pBN	pPC_Library	under300	Gene regulation and genome replication	Unknown	Unknown	3	HBA75_06635	nrdE	class 1b ribonucleoside-diphosphate reductase subunit alpha	F	Metabolism	30	0.15261	C	2	chromosome	19658	NO
pBN	pPC_Library	over300	Gene regulation and genome replication	Unknown	Unknown	3	HBA75_08815	hflX	GTPase HflX	S	Poorly characterized	1	0.00912659	C	3	chromosome	10957	NO
pBN	pPC_Library	over300	Gene regulation and genome replication	Unknown	Unknown	3	HBA75_11325	prpD	2-methylcitrate dehydratase	S	Poorly characterized	23	0.209911	C	2	chromosome	10957	NO	8
pBN	pPC_Library	under300	Gene regulation and genome replication	Unknown	Unknown	3	HBA75_11325	prpD	2-methylcitrate dehydratase	S	Poorly characterized	42	0.213653	C	2	chromosome	19658	NO	8
pBN	pPC_Library	over300	Gene regulation and genome replication	Unknown	Unknown	3	HBA75_14680	proB	glutamate 5-kinase	E	Metabolism	7	0.0638861	C	1	chromosome	10957	B	15
pBN	pPC_Library	under300	Gene regulation and genome replication	Unknown	Unknown	3	HBA75_14680	proB	glutamate 5-kinase	E	Metabolism	30	0.15261	C	1	chromosome	19658	B	15
pBN	pPC_Library	over300	Gene regulation and genome replication	Unknown	Unknown	3	HBA75_15655		beta-lactamase family protein	V	Cellular processes and signaling	768	7.00922	B	2	chromosome	10957	NO	8
pBN	pPC_Library	under300	Gene regulation and genome replication	Unknown	Unknown	3	HBA75_15655		beta-lactamase family protein	V	Cellular processes and signaling	89	0.452742	B	2	chromosome	19658	NO	8
pBN	pPC_Library	over300	Gene regulation and genome replication	Unknown	Unknown	3	HBA75_18825	infB	translation initiation factor IF-2	J	Information storage and processing	6	0.0547595	C	2	chromosome	10957	C	24
pBN	pPN_Library	over300	Gene regulation and genome replication	Unknown	Unknown	3	HBA75_19290	ftsZ	cell division protein FtsZ	D	Cellular processes and signaling	15776	96.6489	A	2	chromosome	16323	B	24
pBN	pPC_Library	over300	Gene regulation and genome replication	Unknown	Unknown	3	HBA75_19295	ftsA	cell division protein FtsA	D	Cellular processes and signaling	3	0.0273798	C	3	chromosome	10957	C	31
pBN	pPC_Library	under300	Gene regulation and genome replication	Unknown	Unknown	3	HBA75_19295	ftsA	cell division protein FtsA	D	Cellular processes and signaling	1	0.00508699	C	3	chromosome	19658	C	31
pBN	pPC_Library	over300	Gene regulation and genome replication	Unknown	Unknown	3	HBA75_19610	lpdA	dihydrolipoyl dehydrogenase	C	Metabolism	2	0.0182532	C	1	chromosome	10957	NO
pBN	pPC_Library	over300	Gene regulation and genome replication	Unknown	Unknown	3	HBA75_22945	ysdC	M42 family metallopeptidase	G	Metabolism	28	0.255544	B	3	chromosome	10957	A	34
pBN	pPC_Library	under300	Gene regulation and genome replication	Unknown	Unknown	3	HBA75_22945	ysdC	M42 family metallopeptidase	G	Metabolism	7	0.0356089	C	3	chromosome	19658	A	34
pBN	pPC_Library	over300	Gene regulation and genome replication	Unknown	Unknown	3	HBA75_23085	pyk	pyruvate kinase	G	Metabolism	85	0.77576	B	3	chromosome	10957	C	26
pBN	pPC_Library	under300	Gene regulation and genome replication	Unknown	Unknown	3	HBA75_23085	pyk	pyruvate kinase	G	Metabolism	12	0.0610438	C	3	chromosome	19658	C	26
pBN	pPC_Library	over300	Gene regulation and genome replication	Unknown	Unknown	3	HBA75_25400	sufB	Fe-S cluster assembly protein SufB	O	Cellular processes and signaling	144	1.31423	B	3	chromosome	10957	NO	16
pBN	pPC_Library	under300	Gene regulation and genome replication	Unknown	Unknown	3	HBA75_25400	sufB	Fe-S cluster assembly protein SufB	O	Cellular processes and signaling	10	0.0508699	C	3	chromosome	19658	NO	16
pBN	pPC_Library	over300	Gene regulation and genome replication	Unknown	Unknown	3	HBA75_26335	cggR	gapA transcriptional regulator CggR	K	Information storage and processing	3	0.0273798	C	2	chromosome	10957	NO	9
pBN	pPC_Library	under300	Gene regulation and genome replication	Unknown	Unknown	3	HBA75_26335	cggR	gapA transcriptional regulator CggR	K	Information storage and processing	5	0.0254349	C	2	chromosome	19658	NO	9
pBN	pPC_Library	over300	Gene regulation and genome replication	Unknown	Unknown	3	HBA75_30450		dipeptide epimerase	M	Cellular processes and signaling	962	8.77978	B	3	pLUSID2	10957	A	31
pBN	pPC_Library	under300	Gene regulation and genome replication	Unknown	Unknown	3	HBA75_30450		dipeptide epimerase	M	Cellular processes and signaling	22	0.111914	C	3	pLUSID2	19658	A	31
pBN	pPC_Library	over300	Gene regulation and genome replication	Unknown	Unknown	3	HBA75_30635		IS110 family transposase	L	Information storage and processing	7	0.0638861	C	4	pLUSID2	10957	NO	9
pBN	pPC_Library	under300	Gene regulation and genome replication	Unknown	Unknown	3	HBA75_30635		IS110 family transposase	L	Information storage and processing	22	0.111914	C	4	pLUSID2	19658	NO	9
pBN	pPC_Library	over300	Gene regulation and genome replication	Unknown	Unknown	3	HBA75_30720		IS4 family transposase	L	Information storage and processing	6	0.0547595	C	3	pLUSID2	10957	B	29
pBN	pPC_Library	over300	Gene regulation and genome replication	DNA Replication	TP	4	HBA75_00375	prs	ribose-phosphate diphosphokinase	F	Metabolism	3	0.034463	C	2	chromosome	8705	NO
pBC	pPC_Library	over300	Gene regulation and genome replication	DNA Replication	TP	4	HBA75_00745	fusA	elongation factor G	J	Information storage and processing	1	0.0101781	C	2	chromosome	9825	C	10
pBC	pPN_Library	over300	Gene regulation and genome replication	DNA Replication	TP	4	HBA75_00745	fusA	elongation factor G	J	Information storage and processing	3	0.0254755	C	4	chromosome	11776	C	10
pBC	pPC_Library	over300	Gene regulation and genome replication	DNA Replication	TP	4	HBA75_01455	alr	alanine racemase	E	Metabolism	272	2.76845	B	2	chromosome	9825	B	30
pBN	pPC_Library	over300	Gene regulation and genome replication	DNA Replication	TP	4	HBA75_01455	alr	alanine racemase	E	Metabolism	7	0.0804136	C	2	chromosome	8705	B	30
pBC	pPC_Library	over300	Gene regulation and genome replication	DNA Replication	TP	4	HBA75_00145	guaB	IMP dehydrogenase	F	Metabolism	2	0.0203562	C	1	chromosome	9825	NO	2
pBC	pPC_Library	over300	Gene regulation and genome replication	DNA Replication	TP	4	HBA75_11115	atoD	acetate CoA-transferase subunit alpha	I	Metabolism	7	0.0712468	C	2	chromosome	9825	C	1
pBC	pPC_Library	over300	Gene regulation and genome replication	DNA Replication	TP	4	HBA75_19620	pdhB	pyruvate dehydrogenase complex E1 component subunit beta	C	Metabolism	4	0.0407125	C	2	chromosome	9825	C	2
pBC	pPC_Library	over300	Gene regulation and genome replication	DNA Replication	TP	4	HBA75_22050	ompR	response regulator transcription factor	T	Cellular processes and signaling	1	0.0101781	C	2	chromosome	9825	NO	1
pBC	pPC_Library	over300	Gene regulation and genome replication	DNA Replication	TP	4	HBA75_22900	pheS	phenylalanine--tRNA ligase subunit alpha	J	Information storage and processing	2	0.0203562	C	1	chromosome	9825	NO	2
pBC	pPC_Library	over300	Gene regulation and genome replication	DNA Replication	TP	4	HBA75_24805	pepA	cytosol aminopeptidase	E	Metabolism	4	0.0407125	C	3	chromosome	9825	NO	6
pBC	pPC_Library	over300	Gene regulation and genome replication	DNA Replication	TP	4	HBA75_25140	dapF	diaminopimelate epimerase	E	Metabolism	12	0.122137	C	1	chromosome	9825	C	1
pBC	pPC_Library	over300	Gene regulation and genome replication	DNA Replication	TP	4	HBA75_26415		phage tail protein	S	Poorly characterized	11	0.111959	C	1	chromosome	9825	NO	2
pBC	pPC_Library	over300	Gene regulation and genome replication	DNA Replication	TP	4	HBA75_27930	GDPD	glycerophosphodiester phosphodiesterase	C	Metabolism	11	0.111959	C	1	chromosome	9825	B	6
pBC	pPC_Library	over300	Gene regulation and genome replication	DNA Replication	TP	4	HBA75_30510		phage tail family protein	S	Poorly characterized	1	0.0101781	C		pLUSID2	9825	C	6
pBC	pPC_Library	over300	Gene regulation and genome replication	DNA Replication	TP	4	HBA75_30675	fumB	class I fumarate hydratase	C	Metabolism	4	0.0407125	C	2	pLUSID2	9825	C	4
pBN	pPC_Library	over300	Gene regulation and genome replication	DNA Replication	TP	4	HBA75_00145	guaB	IMP dehydrogenase	F	Metabolism	3	0.034463	C	1	chromosome	8705	NO	2
pBN	pPC_Library	over300	Gene regulation and genome replication	DNA Replication	TP	4	HBA75_02235	pbpX	beta-lactamase family protein	V	Cellular processes and signaling	165	1.89546	B	3	chromosome	8705	NO	4
pBN	pPC_Library	over300	Gene regulation and genome replication	DNA Replication	TP	4	HBA75_05440	wapA	DNRLRE domain-containing protein	M	Cellular processes and signaling	4533	52.0735	A	2	chromosome	8705	NO	1
pBN	pPC_Library	over300	Gene regulation and genome replication	DNA Replication	TP	4	HBA75_15635		AAA family ATPase	L	Information storage and processing	1	0.0114877	C	2	chromosome	8705	NO	1
pBN	pPC_Library	over300	Gene regulation and genome replication	DNA Replication	TP	4	HBA75_21870	hisS	histidine--tRNA ligase	J	Information storage and processing	261	2.99828	B	2	chromosome	8705	NO	1
pBN	pPC_Library	over300	Gene regulation and genome replication	DNA Replication	TP	4	HBA75_22900	pheS	phenylalanine--tRNA ligase subunit alpha	J	Information storage and processing	1	0.0114877	C	1	chromosome	8705	NO	2
pBN	pPC_Library	over300	Gene regulation and genome replication	DNA Replication	TP	4	HBA75_25540	fadM	proline dehydrogenase	E	Metabolism	6	0.0689259	C	2	chromosome	8705	NO	1
pBN	pPC_Library	over300	Gene regulation and genome replication	DNA Replication	TP	4	HBA75_26415		phage tail protein	S	Poorly characterized	1	0.0114877	C	1	chromosome	8705	NO	2
pBC	pPN_Library	over300	Gene regulation and genome replication	DNA Replication	TP	4	HBA75_02235	pbpX	beta-lactamase family protein	V	Cellular processes and signaling	16	0.13587	C	3	chromosome	11776	NO	4
pBC	pPN_Library	under300	Gene regulation and genome replication	DNA Replication	TP	4	HBA75_02235	pbpX	beta-lactamase family protein	V	Cellular processes and signaling	5	0.0155958	C	3	chromosome	32060	NO	4
pBC	pPN_Library	under300	Gene regulation and genome replication	DNA Replication	TP	4	HBA75_25540	fadM	proline dehydrogenase	E	Metabolism	1	0.00311915	C	2	chromosome	32060	NO	1
pBC	pPN_Library	under300	Gene regulation and genome replication	DNA Replication	TP	4	HBA75_27790	mmgA	acetyl-CoA C-acetyltransferase	I	Metabolism	1	0.00311915	C	3	chromosome	32060	NO	2
pBC	pPN_Library	over300	Gene regulation and genome replication	DNA Replication	TP	4	HBA75_29670	ltrA	group II intron reverse transcriptase/maturase	L	Information storage and processing	1	0.00849185	C	4	pLUSID1	11776	NO	2
pBC	pPC_Library	over300	Gene regulation and genome replication	DNA Replication	TP	4	HBA75_02620	citH	CitMHS family transporter	C	Metabolism	1	0.0101781	C	3	chromosome	9825	NO	10
pBC	pPC_Library	over300	Gene regulation and genome replication	DNA Replication	TP	4	HBA75_03595	nrtA	ABC transporter substrate-binding protein	P	Metabolism	1080	10.9924	A	3	chromosome	9825	A	31
pBN	pPC_Library	over300	Gene regulation and genome replication	DNA Replication	TP	4	HBA75_03595	nrtA	ABC transporter substrate-binding protein	P	Metabolism	838	9.62665	B	3	chromosome	8705	A	31
pBC	pPC_Library	over300	Gene regulation and genome replication	DNA Replication	TP	4	HBA75_03795		DUF3238 domain-containing protein	S	Poorly characterized	5	0.0508906	C	1	chromosome	9825	C	12
pBC	pPC_Library	over300	Gene regulation and genome replication	DNA Replication	TP	4	HBA75_04365		methyltransferase	L	Information storage and processing	11	0.111959	C	3	chromosome	9825	NO	11
pBN	pPC_Library	over300	Gene regulation and genome replication	DNA Replication	TP	4	HBA75_04365		methyltransferase	L	Information storage and processing	3	0.034463	C	3	chromosome	8705	NO	11
pBC	pPN_Library	over300	Gene regulation and genome replication	DNA Replication	TP	4	HBA75_04365		methyltransferase	L	Information storage and processing	37	0.314198	B	3	chromosome	11776	NO	11
pBC	pPN_Library	under300	Gene regulation and genome replication	DNA Replication	TP	4	HBA75_04365		methyltransferase	L	Information storage and processing	3	0.00935745	C	3	chromosome	32060	NO	11
pBC	pPN_Library	under300	Gene regulation and genome replication	DNA Replication	TP	4	HBA75_04390		ABC transporter permease	P	Metabolism	1	0.00311915	C	4	chromosome	32060	NO
pBC	pPC_Library	over300	Gene regulation and genome replication	DNA Replication	TP	4	HBA75_04720		alpha/beta fold hydrolase	G	Metabolism	54	0.549618	B	3	chromosome	9825	NO	11
pBN	pPC_Library	over300	Gene regulation and genome replication	DNA Replication	TP	4	HBA75_04720		alpha/beta fold hydrolase	G	Metabolism	1054	12.108	A	3	chromosome	8705	NO	11
pBC	pPC_Library	over300	Gene regulation and genome replication	DNA Replication	TP	4	HBA75_05095	oxdD	oxalate decarboxylase family bicupin	G	Metabolism	1	0.0101781	C	3	chromosome	9825	NO	7
pBN	pPC_Library	over300	Gene regulation and genome replication	DNA Replication	TP	4	HBA75_05095	oxdD	oxalate decarboxylase family bicupin	G	Metabolism	1	0.0114877	C	3	chromosome	8705	NO	7
pBC	pPN_Library	over300	Gene regulation and genome replication	DNA Replication	TP	4	HBA75_06425	focA	formate/nitrite transporter family protein	P	Metabolism	1	0.00849185	C	2	chromosome	11776	NO
pBN	pPC_Library	over300	Gene regulation and genome replication	DNA Replication	TP	4	HBA75_06635	nrdE	class 1b ribonucleoside-diphosphate reductase subunit alpha	F	Metabolism	2	0.0229753	C	2	chromosome	8705	NO
pBC	pPC_Library	over300	Gene regulation and genome replication	DNA Replication	TP	4	HBA75_08260	fliM	flagellar motor switch protein FliM	N	Cellular processes and signaling	18	0.183206	C	2	chromosome	9825	B	9
pBC	pPC_Library	over300	Gene regulation and genome replication	DNA Replication	TP	4	HBA75_08815	hflX	GTPase HflX	S	Poorly characterized	1	0.0101781	C	3	chromosome	9825	C
pBC	pPC_Library	over300	Gene regulation and genome replication	DNA Replication	TP	4	HBA75_11325	prpD	2-methylcitrate dehydratase	S	Poorly characterized	6	0.0610687	C	2	chromosome	9825	C	8
pBC	pPC_Library	over300	Gene regulation and genome replication	DNA Replication	TP	4	HBA75_12125		non-ribosomal peptide synthetase	Q	Metabolism	2	0.0203562	C	3	chromosome	9825	NO	8
pBC	pPN_Library	over300	Gene regulation and genome replication	DNA Replication	TP	4	HBA75_12125		non-ribosomal peptide synthetase	Q	Metabolism	1	0.00849185	C	3	chromosome	11776	NO	8
pBC	pPC_Library	over300	Gene regulation and genome replication	DNA Replication	TP	4	HBA75_12130		amino acid adenylation domain-containing protein	Q	Metabolism	2	0.0203562	C	3	chromosome	9825	NO	8
pBC	pPN_Library	over300	Gene regulation and genome replication	DNA Replication	TP	4	HBA75_12130		amino acid adenylation domain-containing protein	Q	Metabolism	1	0.00849185	C	3	chromosome	11776	NO	8
pBC	pPC_Library	over300	Gene regulation and genome replication	DNA Replication	TP	4	HBA75_14510	aroC	chorismate synthase	E	Metabolism	2	0.0203562	C	1	chromosome	9825	C
pBC	pPC_Library	over300	Gene regulation and genome replication	DNA Replication	TP	4	HBA75_14680	proB	glutamate 5-kinase	E	Metabolism	59	0.600509	B	1	chromosome	9825	C	15
pBN	pPC_Library	over300	Gene regulation and genome replication	DNA Replication	TP	4	HBA75_14680	proB	glutamate 5-kinase	E	Metabolism	6	0.0689259	C	1	chromosome	8705	B	15
pBC	pPC_Library	over300	Gene regulation and genome replication	DNA Replication	TP	4	HBA75_15655		beta-lactamase family protein	V	Cellular processes and signaling	33	0.335878	B	2	chromosome	9825	NO	8
pBN	pPC_Library	over300	Gene regulation and genome replication	DNA Replication	TP	4	HBA75_15655		beta-lactamase family protein	V	Cellular processes and signaling	255	2.92935	B	2	chromosome	8705	NO	8
pBC	pPC_Library	over300	Gene regulation and genome replication	DNA Replication	TP	4	HBA75_16405	rfbG	CDP-glucose 4.6-dehydratase	G	Metabolism	1	0.0101781	C	3	chromosome	9825	NO	12
pBN	pPC_Library	over300	Gene regulation and genome replication	DNA Replication	TP	4	HBA75_16405	rfbG	CDP-glucose 4.6-dehydratase	G	Metabolism	1	0.0114877	C	3	chromosome	8705	NO	12
pBC	pPN_Library	over300	Gene regulation and genome replication	DNA Replication	TP	4	HBA75_16875	wapA	RHS repeat-associated core domain-containing protein	M	Cellular processes and signaling	10	0.0849185	C	2	chromosome	11776	NO
pBC	pPN_Library	over300	Gene regulation and genome replication	DNA Replication	TP	4	HBA75_16885	wapA	RHS repeat-associated core domain-containing protein	M	Cellular processes and signaling	10	0.0849185	C	2	chromosome	11776	NO
pBC	pPC_Library	over300	Gene regulation and genome replication	DNA Replication	TP	4	HBA75_18825	infB	translation initiation factor IF-2	J	Information storage and processing	465	4.73282	B	2	chromosome	9825	B	24
pBN	pPC_Library	over300	Gene regulation and genome replication	DNA Replication	TP	4	HBA75_18825	infB	translation initiation factor IF-2	J	Information storage and processing	14	0.160827	C	2	chromosome	8705	C	24
pBC	pPN_Library	under300	Gene regulation and genome replication	DNA Replication	TP	4	HBA75_18825	infB	translation initiation factor IF-2	J	Information storage and processing	1	0.00311915	C	2	chromosome	32060	B	24
pBC	pPC_Library	over300	Gene regulation and genome replication	DNA Replication	TP	4	HBA75_18965	trmD	tRNA (guanosine(37)-N1)-methyltransferase TrmD	J	Information storage and processing	8	0.0814249	C	3	chromosome	9825	C	10
pBN	pPC_Library	over300	Gene regulation and genome replication	DNA Replication	TP	4	HBA75_18965	trmD	tRNA (guanosine(37)-N1)-methyltransferase TrmD	J	Information storage and processing	1	0.0114877	C	3	chromosome	8705	NO	10
pBC	pPC_Library	over300	Gene regulation and genome replication	DNA Replication	TP	4	HBA75_19295	ftsA	cell division protein FtsA	D	Cellular processes and signaling	916	9.32316	B	3	chromosome	9825	A	31
pBN	pPC_Library	over300	Gene regulation and genome replication	DNA Replication	TP	4	HBA75_19295	ftsA	cell division protein FtsA	D	Cellular processes and signaling	26	0.298679	B	3	chromosome	8705	C	31
pBC	pPN_Library	over300	Gene regulation and genome replication	DNA Replication	TP	4	HBA75_19625	pdhA	pyruvate dehydrogenase E1 component subunit alpha	C	Metabolism	27	0.22928	C	3	chromosome	11776	NO
pBC	pPN_Library	under300	Gene regulation and genome replication	DNA Replication	TP	4	HBA75_19625	pdhA	pyruvate dehydrogenase E1 component subunit alpha	C	Metabolism	6	0.0187149	C	3	chromosome	32060	NO
pBC	pPC_Library	over300	Gene regulation and genome replication	DNA Replication	TP	4	HBA75_20760	accC	acetyl-CoA carboxylase biotin carboxylase subunit	I	Metabolism	1	0.0101781	C	2	chromosome	9825	C
pBC	pPC_Library	over300	Gene regulation and genome replication	DNA Replication	TP	4	HBA75_21125	metB	cystathionine gamma-synthase/O-acetylhomoserine thiolyase	E	Metabolism	3	0.0305344	C	2	chromosome	9825	C	8
pBC	pPN_Library	over300	Gene regulation and genome replication	DNA Replication	TP	4	HBA75_21500	comER	late competence protein ComER	E	Metabolism	3	0.0254755	C	2	chromosome	11776	NO
pBC	pPC_Library	over300	Gene regulation and genome replication	DNA Replication	TP	4	HBA75_22945	ysdC	M42 family metallopeptidase	G	Metabolism	746	7.59288	B	3	chromosome	9825	A	34
pBN	pPC_Library	over300	Gene regulation and genome replication	DNA Replication	TP	4	HBA75_22945	ysdC	M42 family metallopeptidase	G	Metabolism	39	0.448018	B	3	chromosome	8705	A	34
pBC	pPN_Library	over300	Gene regulation and genome replication	DNA Replication	TP	4	HBA75_22945	ysdC	M42 family metallopeptidase	G	Metabolism	1	0.00849185	C	3	chromosome	11776	A	34
pBC	pPN_Library	over300	Gene regulation and genome replication	DNA Replication	TP	4	HBA75_23000	dnaB	Replication initiation and membrane attachment protein	L	Information storage and processing	4	0.0339674	C	3	chromosome	11776	NO
pBC	pPN_Library	under300	Gene regulation and genome replication	DNA Replication	TP	4	HBA75_23000	dnaB	Replication initiation and membrane attachment protein	L	Information storage and processing	2	0.0062383	C	3	chromosome	32060	NO
pBC	pPC_Library	over300	Gene regulation and genome replication	DNA Replication	TP	4	HBA75_23085	pyk	pyruvate kinase	G	Metabolism	143	1.45547	B	3	chromosome	9825	B	26
pBN	pPC_Library	over300	Gene regulation and genome replication	DNA Replication	TP	4	HBA75_23085	pyk	pyruvate kinase	G	Metabolism	5	0.0574383	C	3	chromosome	8705	C	26
pBC	pPC_Library	over300	Gene regulation and genome replication	DNA Replication	TP	4	HBA75_23535	pncB	nicotinate phosphoribosyltransferase	H	Metabolism	10	0.101781	C	2	chromosome	9825	NO	8
pBN	pPC_Library	over300	Gene regulation and genome replication	DNA Replication	TP	4	HBA75_23535	pncB	nicotinate phosphoribosyltransferase	H	Metabolism	4	0.0459506	C	2	chromosome	8705	NO	8
pBC	pPC_Library	over300	Gene regulation and genome replication	DNA Replication	TP	4	HBA75_23625	pepV	dipeptidase PepV	E	Metabolism	147	1.49618	B	2	chromosome	9825	B	29
pBN	pPC_Library	over300	Gene regulation and genome replication	DNA Replication	TP	4	HBA75_23625	pepV	dipeptidase PepV	E	Metabolism	4	0.0459506	C	2	chromosome	8705	C	29
pBC	pPC_Library	over300	Gene regulation and genome replication	DNA Replication	TP	4	HBA75_24840	yobU	AraC family transcriptional regulator	K	Information storage and processing	2	0.0203562	C	1	chromosome	9825	C
pBC	pPC_Library	over300	Gene regulation and genome replication	DNA Replication	TP	4	HBA75_25400	sufB	Fe-S cluster assembly protein SufB	O	Cellular processes and signaling	12	0.122137	C	3	chromosome	9825	C	16
pBN	pPC_Library	over300	Gene regulation and genome replication	DNA Replication	TP	4	HBA75_25400	sufB	Fe-S cluster assembly protein SufB	O	Cellular processes and signaling	2	0.0229753	C	3	chromosome	8705	NO	16
pBC	pPC_Library	over300	Gene regulation and genome replication	DNA Replication	TP	4	HBA75_26335	cggR	gapA transcriptional regulator CggR	K	Information storage and processing	1	0.0101781	C	2	chromosome	9825	NO	9
pBN	pPC_Library	over300	Gene regulation and genome replication	DNA Replication	TP	4	HBA75_26335	cggR	gapA transcriptional regulator CggR	K	Information storage and processing	1	0.0114877	C	2	chromosome	8705	NO	9
pBC	pPN_Library	over300	Gene regulation and genome replication	DNA Replication	TP	4	HBA75_26685		hypothetical protein	NO		1	0.00849185	C		chromosome	11776	NO
pBN	pPC_Library	over300	Gene regulation and genome replication	DNA Replication	TP	4	HBA75_26720		tyrosine-type recombinase/integrase	L	Information storage and processing	1	0.0114877	C	1	chromosome	8705	NO
pBC	pPC_Library	over300	Gene regulation and genome replication	DNA Replication	TP	4	HBA75_28485	yyaC	spore protease YyaC	S	Poorly characterized	1	0.0101781	C	1	chromosome	9825	NO
pBC	pPC_Library	over300	Gene regulation and genome replication	DNA Replication	TP	4	HBA75_28945		methyltransferase	NO		1	0.0101781	C	1	pLUSID1	9825	NO
pBC	pPC_Library	over300	Gene regulation and genome replication	DNA Replication	TP	4	HBA75_30450		dipeptide epimerase	M	Cellular processes and signaling	3590	36.5394	A	3	pLUSID2	9825	A	31
pBN	pPC_Library	over300	Gene regulation and genome replication	DNA Replication	TP	4	HBA75_30450		dipeptide epimerase	M	Cellular processes and signaling	408	4.68696	B	3	pLUSID2	8705	A	31
pBC	pPC_Library	over300	Gene regulation and genome replication	DNA Replication	TP	4	HBA75_30635		IS110 family transposase	L	Information storage and processing	2	0.0203562	C	4	pLUSID2	9825	NO	9
pBN	pPC_Library	over300	Gene regulation and genome replication	DNA Replication	TP	4	HBA75_30635		IS110 family transposase	L	Information storage and processing	1	0.0114877	C	4	pLUSID2	8705	NO	9
pBC	pPN_Library	over300	Gene regulation and genome replication	DNA Replication	TP	4	HBA75_30635		IS110 family transposase	L	Information storage and processing	1	0.00849185	C	4	pLUSID2	11776	NO	9
pBC	pPN_Library	under300	Gene regulation and genome replication	DNA Replication	TP	4	HBA75_30635		IS110 family transposase	L	Information storage and processing	9	0.0280724	C	4	pLUSID2	32060	NO	9
pBC	pPC_Library	over300	Gene regulation and genome replication	DNA Replication	TP	4	HBA75_30685	yfkA	radical SAM/CxCxxxxC motif protein YfkAB	S	Poorly characterized	2	0.0203562	C	3	pLUSID2	9825	NO	7
pBC	pPC_Library	over300	Gene regulation and genome replication	DNA Replication	TP	4	HBA75_30720		IS4 family transposase	L	Information storage and processing	817	8.31552	B	3	pLUSID2	9825	B	29
pBC	pPN_Library	over300	Gene regulation and genome replication	DNA Replication	TP	4	HBA75_30720		IS4 family transposase	L	Information storage and processing	2	0.0169837	C	3	pLUSID2	11776	B	29
pBC	pPC_Library	over300	Gene regulation and genome replication	DNA Replication	#N/A	5	HBA75_00745	fusA	elongation factor G	J	Information storage and processing	2	0.0167238	C	2	chromosome	11959	C	10
pBC	pPC_Library	over300	Gene regulation and genome replication	DNA Replication	#N/A	5	HBA75_01455	alr	alanine racemase	E	Metabolism	342	2.85977	B	2	chromosome	11959	B	30
pBC	pPC_Library	over300	Gene regulation and genome replication	DNA Replication	#N/A	5	HBA75_00145	guaB	IMP dehydrogenase	F	Metabolism	2	0.0167238	C	1	chromosome	11959	NO	2
pBC	pPC_Library	over300	Gene regulation and genome replication	DNA Replication	#N/A	5	HBA75_03605	thiO	glycine oxidase ThiO	E	Metabolism	2	0.0167238	C	1	chromosome	11959	NO	3
pBC	pPC_Library	over300	Gene regulation and genome replication	DNA Replication	#N/A	5	HBA75_11115	atoD	acetate CoA-transferase subunit alpha	I	Metabolism	15	0.125429	C	2	chromosome	11959	C	1
pBC	pPC_Library	over300	Gene regulation and genome replication	DNA Replication	#N/A	5	HBA75_15635		AAA family ATPase	L	Information storage and processing	2	0.0167238	C	2	chromosome	11959	NO	1
pBC	pPC_Library	over300	Gene regulation and genome replication	DNA Replication	#N/A	5	HBA75_19620	pdhB	pyruvate dehydrogenase complex E1 component subunit beta	C	Metabolism	5	0.0418095	C	2	chromosome	11959	C	2
pBC	pPC_Library	over300	Gene regulation and genome replication	DNA Replication	#N/A	5	HBA75_22050	ompR	response regulator transcription factor	T	Cellular processes and signaling	1	0.0083619	C	2	chromosome	11959	NO	1
pBC	pPC_Library	over300	Gene regulation and genome replication	DNA Replication	#N/A	5	HBA75_22900	pheS	phenylalanine--tRNA ligase subunit alpha	J	Information storage and processing	3	0.0250857	C	1	chromosome	11959	NO	2
pBC	pPC_Library	over300	Gene regulation and genome replication	DNA Replication	#N/A	5	HBA75_24805	pepA	cytosol aminopeptidase	E	Metabolism	7	0.0585333	C	3	chromosome	11959	NO	6
pBC	pPC_Library	over300	Gene regulation and genome replication	DNA Replication	#N/A	5	HBA75_25140	dapF	diaminopimelate epimerase	E	Metabolism	18	0.150514	C	1	chromosome	11959	C	1
pBC	pPC_Library	over300	Gene regulation and genome replication	DNA Replication	#N/A	5	HBA75_26415		phage tail protein	S	Poorly characterized	21	0.1756	C	1	chromosome	11959	NO	2
pBC	pPC_Library	over300	Gene regulation and genome replication	DNA Replication	#N/A	5	HBA75_27930	GDPD	glycerophosphodiester phosphodiesterase	C	Metabolism	6	0.0501714	C	1	chromosome	11959	B	6
pBC	pPC_Library	over300	Gene regulation and genome replication	DNA Replication	#N/A	5	HBA75_30510		phage tail family protein	S	Poorly characterized	1	0.0083619	C		pLUSID2	11959	C	6
pBC	pPC_Library	over300	Gene regulation and genome replication	DNA Replication	#N/A	5	HBA75_30675	fumB	class I fumarate hydratase	C	Metabolism	2	0.0167238	C	2	pLUSID2	11959	C	4
pBN	pPC_Library	over300	Gene regulation and genome replication	DNA Replication	#N/A	5	HBA75_08385	phnT	ABC transporter ATP-binding protein	P	Metabolism	1	0.0110387	C	2	chromosome	9059	NO	6
pBN	pPC_Library	over300	Gene regulation and genome replication	DNA Replication	#N/A	5	HBA75_23575	pepA	M42 family metallopeptidase	G	Metabolism	5	0.0551937	C	1	chromosome	9059	NO	3
pBN	pPC_Library	over300	Gene regulation and genome replication	DNA Replication	#N/A	5	HBA75_02890	aspA	aspartate ammonia-lyase	E	Metabolism	1	0.0110387	C	3	chromosome	9059	C	10
pBC	pPC_Library	over300	Gene regulation and genome replication	DNA Replication	#N/A	5	HBA75_03595	nrtA	ABC transporter substrate-binding protein	P	Metabolism	1558	13.0278	A	3	chromosome	11959	A	31
pBC	pPC_Library	over300	Gene regulation and genome replication	DNA Replication	#N/A	5	HBA75_03795		DUF3238 domain-containing protein	S	Poorly characterized	8	0.0668952	C	1	chromosome	11959	C	12
pBC	pPC_Library	over300	Gene regulation and genome replication	DNA Replication	#N/A	5	HBA75_03905		DUF871 domain-containing protein	S	Poorly characterized	2	0.0167238	C	2	chromosome	11959	C
pBC	pPC_Library	over300	Gene regulation and genome replication	DNA Replication	#N/A	5	HBA75_04365		methyltransferase	L	Information storage and processing	9	0.0752571	C	3	chromosome	11959	NO	11
pBN	pPC_Library	over300	Gene regulation and genome replication	DNA Replication	#N/A	5	HBA75_04365		methyltransferase	L	Information storage and processing	1	0.0110387	C	3	chromosome	9059	NO	11
pBC	pPC_Library	over300	Gene regulation and genome replication	DNA Replication	#N/A	5	HBA75_04720		alpha/beta fold hydrolase	G	Metabolism	121	1.01179	B	3	chromosome	11959	NO	11
pBN	pPC_Library	over300	Gene regulation and genome replication	DNA Replication	#N/A	5	HBA75_04720		alpha/beta fold hydrolase	G	Metabolism	1	0.0110387	C	3	chromosome	9059	NO	11
pBC	pPC_Library	over300	Gene regulation and genome replication	DNA Replication	#N/A	5	HBA75_08260	fliM	flagellar motor switch protein FliM	N	Cellular processes and signaling	20	0.167238	C	2	chromosome	11959	B	9
pBC	pPC_Library	over300	Gene regulation and genome replication	DNA Replication	#N/A	5	HBA75_11325	prpD	2-methylcitrate dehydratase	S	Poorly characterized	14	0.117067	C	2	chromosome	11959	C	8
pBN	pPC_Library	over300	Gene regulation and genome replication	DNA Replication	#N/A	5	HBA75_11325	prpD	2-methylcitrate dehydratase	S	Poorly characterized	5198	57.3794	A	2	chromosome	9059	NO	8
pBC	pPC_Library	over300	Gene regulation and genome replication	DNA Replication	#N/A	5	HBA75_12125		non-ribosomal peptide synthetase	Q	Metabolism	1	0.0083619	C	3	chromosome	11959	NO	8
pBN	pPC_Library	over300	Gene regulation and genome replication	DNA Replication	#N/A	5	HBA75_12125		non-ribosomal peptide synthetase	Q	Metabolism	1	0.0110387	C	3	chromosome	9059	NO	8
pBC	pPC_Library	over300	Gene regulation and genome replication	DNA Replication	#N/A	5	HBA75_12130		amino acid adenylation domain-containing protein	Q	Metabolism	1	0.0083619	C	3	chromosome	11959	NO	8
pBN	pPC_Library	over300	Gene regulation and genome replication	DNA Replication	#N/A	5	HBA75_12130		amino acid adenylation domain-containing protein	Q	Metabolism	1	0.0110387	C	3	chromosome	9059	NO	8
pBC	pPC_Library	over300	Gene regulation and genome replication	DNA Replication	#N/A	5	HBA75_14510	aroC	chorismate synthase	E	Metabolism	1	0.0083619	C	1	chromosome	11959	C
pBC	pPC_Library	over300	Gene regulation and genome replication	DNA Replication	#N/A	5	HBA75_14680	proB	glutamate 5-kinase	E	Metabolism	36	0.301029	B	1	chromosome	11959	C	15
pBC	pPC_Library	over300	Gene regulation and genome replication	DNA Replication	#N/A	5	HBA75_15655		beta-lactamase family protein	V	Cellular processes and signaling	73	0.610419	B	2	chromosome	11959	NO	8
pBC	pPC_Library	over300	Gene regulation and genome replication	DNA Replication	#N/A	5	HBA75_16405	rfbG	CDP-glucose 4.6-dehydratase	G	Metabolism	3	0.0250857	C	3	chromosome	11959	NO	12
pBC	pPC_Library	over300	Gene regulation and genome replication	DNA Replication	#N/A	5	HBA75_18825	infB	translation initiation factor IF-2	J	Information storage and processing	459	3.83811	B	2	chromosome	11959	B	24
pBC	pPC_Library	over300	Gene regulation and genome replication	DNA Replication	#N/A	5	HBA75_18965	trmD	tRNA (guanosine(37)-N1)-methyltransferase TrmD	J	Information storage and processing	13	0.108705	C	3	chromosome	11959	C	10
pBN	pPN_Library	over300	Gene regulation and genome replication	DNA Replication	#N/A	5	HBA75_19290	ftsZ	cell division protein FtsZ	D	Cellular processes and signaling	5850	92.6806	A	2	chromosome	6312	B	24
pBC	pPC_Library	over300	Gene regulation and genome replication	DNA Replication	#N/A	5	HBA75_19295	ftsA	cell division protein FtsA	D	Cellular processes and signaling	1439	12.0328	A	3	chromosome	11959	A	31
pBC	pPC_Library	over300	Gene regulation and genome replication	DNA Replication	#N/A	5	HBA75_20760	accC	acetyl-CoA carboxylase biotin carboxylase subunit	I	Metabolism	1	0.0083619	C	2	chromosome	11959	C
pBC	pPC_Library	over300	Gene regulation and genome replication	DNA Replication	#N/A	5	HBA75_21125	metB	cystathionine gamma-synthase/O-acetylhomoserine thiolyase	E	Metabolism	6	0.0501714	C	2	chromosome	11959	C	8
pBC	pPC_Library	over300	Gene regulation and genome replication	DNA Replication	#N/A	5	HBA75_21275	nfo	deoxyribonuclease IV	L	Information storage and processing	1	0.0083619	C	2	chromosome	11959	C
pBC	pPC_Library	over300	Gene regulation and genome replication	DNA Replication	#N/A	5	HBA75_22945	ysdC	M42 family metallopeptidase	G	Metabolism	1179	9.85868	B	3	chromosome	11959	A	34
pBN	pPC_Library	over300	Gene regulation and genome replication	DNA Replication	#N/A	5	HBA75_22945	ysdC	M42 family metallopeptidase	G	Metabolism	1	0.0110387	C	3	chromosome	9059	A	34
pBC	pPC_Library	over300	Gene regulation and genome replication	DNA Replication	#N/A	5	HBA75_23085	pyk	pyruvate kinase	G	Metabolism	178	1.48842	B	3	chromosome	11959	B	26
pBN	pPC_Library	over300	Gene regulation and genome replication	DNA Replication	#N/A	5	HBA75_23085	pyk	pyruvate kinase	G	Metabolism	1	0.0110387	C	3	chromosome	9059	C	26
pBC	pPC_Library	over300	Gene regulation and genome replication	DNA Replication	#N/A	5	HBA75_23535	pncB	nicotinate phosphoribosyltransferase	H	Metabolism	5	0.0418095	C	2	chromosome	11959	NO	8
pBN	pPC_Library	over300	Gene regulation and genome replication	DNA Replication	#N/A	5	HBA75_23535	pncB	nicotinate phosphoribosyltransferase	H	Metabolism	2	0.0220775	C	2	chromosome	9059	NO	8
pBC	pPC_Library	over300	Gene regulation and genome replication	DNA Replication	#N/A	5	HBA75_23625	pepV	dipeptidase PepV	E	Metabolism	156	1.30446	B	2	chromosome	11959	B	29
pBC	pPC_Library	over300	Gene regulation and genome replication	DNA Replication	#N/A	5	HBA75_24040		recombinase family protein	NO		1	0.0083619	C	1	chromosome	11959	NO
pBC	pPC_Library	over300	Gene regulation and genome replication	DNA Replication	#N/A	5	HBA75_25400	sufB	Fe-S cluster assembly protein SufB	O	Cellular processes and signaling	11	0.0919809	C	3	chromosome	11959	C	16
pBN	pPC_Library	over300	Gene regulation and genome replication	DNA Replication	#N/A	5	HBA75_25400	sufB	Fe-S cluster assembly protein SufB	O	Cellular processes and signaling	1	0.0110387	C	3	chromosome	9059	NO	16
pBC	pPC_Library	over300	Gene regulation and genome replication	DNA Replication	#N/A	5	HBA75_26335	cggR	gapA transcriptional regulator CggR	K	Information storage and processing	3	0.0250857	C	2	chromosome	11959	NO	9
pBN	pPN_Library	over300	Gene regulation and genome replication	DNA Replication	#N/A	5	HBA75_27735	glpX	class II fructose-bisphosphatase	G	Metabolism	1	0.0158428	C	3	chromosome	6312	NO
pBC	pPC_Library	over300	Gene regulation and genome replication	DNA Replication	#N/A	5	HBA75_30450		dipeptide epimerase	M	Cellular processes and signaling	4216	35.2538	A	3	pLUSID2	11959	A	31
pBN	pPC_Library	over300	Gene regulation and genome replication	DNA Replication	#N/A	5	HBA75_30450		dipeptide epimerase	M	Cellular processes and signaling	2	0.0220775	C	3	pLUSID2	9059	A	31
pBC	pPC_Library	over300	Gene regulation and genome replication	DNA Replication	#N/A	5	HBA75_30635		IS110 family transposase	L	Information storage and processing	1	0.0083619	C	4	pLUSID2	11959	NO	9
pBC	pPC_Library	over300	Gene regulation and genome replication	DNA Replication	#N/A	5	HBA75_30685	yfkA	radical SAM/CxCxxxxC motif protein YfkAB	S	Poorly characterized	2	0.0167238	C	3	pLUSID2	11959	NO	7
pBC	pPC_Library	over300	Gene regulation and genome replication	DNA Replication	#N/A	5	HBA75_30720		IS4 family transposase	L	Information storage and processing	765	6.39686	B	3	pLUSID2	11959	B	29
pBN	pPC_Library	over300	Gene regulation and genome replication	Cycle regulator	Cycle regulator/LexA-like	6	HBA75_00375	prs	ribose-phosphate diphosphokinase	F	Metabolism	9	0.091352	C	2	chromosome	9852	NO
pBC	pPN_Library	over300	Gene regulation and genome replication	Cycle regulator	Cycle regulator/LexA-like	6	HBA75_00400	yabM	oligosaccharide flippase family protein	S	Poorly characterized	7	0.104571	C	3	chromosome	6694	NO
pBC	pPC_Library	over300	Gene regulation and genome replication	Cycle regulator	Cycle regulator/LexA-like	6	HBA75_00745	fusA	elongation factor G	J	Information storage and processing	22	0.232706	C	2	chromosome	9454	C	10
pBC	pPC_Library	under300	Gene regulation and genome replication	Cycle regulator	Cycle regulator/LexA-like	6	HBA75_00745	fusA	elongation factor G	J	Information storage and processing	5	0.0254143	C	2	chromosome	19674	C	10
pBN	pPC_Library	over300	Gene regulation and genome replication	Cycle regulator	Cycle regulator/LexA-like	6	HBA75_00745	fusA	elongation factor G	J	Information storage and processing	124	1.25863	B	2	chromosome	9852	NO	10
pBC	pPC_Library	over300	Gene regulation and genome replication	Cycle regulator	Cycle regulator/LexA-like	6	HBA75_01050	glmS	glutamine--fructose-6-phosphate transaminase (isomerizing)	M	Cellular processes and signaling	1	0.0105775	C	3	chromosome	9454	NO
pBC	pPC_Library	over300	Gene regulation and genome replication	Cycle regulator	Cycle regulator/LexA-like	6	HBA75_01455	alr	alanine racemase	E	Metabolism	783	8.28221	B	2	chromosome	9454	B	30
pBC	pPC_Library	under300	Gene regulation and genome replication	Cycle regulator	Cycle regulator/LexA-like	6	HBA75_01455	alr	alanine racemase	E	Metabolism	10548	53.6139	A	2	chromosome	19674	B	30
pBN	pPC_Library	over300	Gene regulation and genome replication	Cycle regulator	Cycle regulator/LexA-like	6	HBA75_01455	alr	alanine racemase	E	Metabolism	3	0.0304507	C	2	chromosome	9852	B	30
pBN	pPC_Library	over300	Gene regulation and genome replication	Cycle regulator	Cycle regulator/LexA-like	6	HBA75_01995	gatA	Asp-tRNA(Asn)/Glu-tRNA(Gln) amidotransferase subunit GatA	J	Information storage and processing	8	0.0812018	C	1	chromosome	9852	NO
pBN	pPC_Library	over300	Gene regulation and genome replication	Cycle regulator	Cycle regulator/LexA-like	6	HBA75_02545	queG	tRNA epoxyqueuosine(34) reductase QueG	C	Metabolism	9	0.091352	C	2	chromosome	9852	NO
pBC	pPC_Library	over300	Gene regulation and genome replication	Cycle regulator	Cycle regulator/LexA-like	6	HBA75_01870	purL	phosphoribosylformylglycinamidine synthase II	F	Metabolism	1	0.0105775	C	2	chromosome	9454	NO	5
pBC	pPC_Library	over300	Gene regulation and genome replication	Cycle regulator	Cycle regulator/LexA-like	6	HBA75_03605	thiO	glycine oxidase ThiO	E	Metabolism	10	0.105775	C	1	chromosome	9454	NO	3
pBC	pPC_Library	under300	Gene regulation and genome replication	Cycle regulator	Cycle regulator/LexA-like	6	HBA75_03605	thiO	glycine oxidase ThiO	E	Metabolism	1	0.00508285	C	1	chromosome	19674	NO	3
pBC	pPC_Library	over300	Gene regulation and genome replication	Cycle regulator	Cycle regulator/LexA-like	6	HBA75_05625	addA	helicase-exonuclease AddAB subunit AddA	L	Information storage and processing	11	0.116353	C	1	chromosome	9454	NO	1
pBC	pPC_Library	under300	Gene regulation and genome replication	Cycle regulator	Cycle regulator/LexA-like	6	HBA75_05625	addA	helicase-exonuclease AddAB subunit AddA	L	Information storage and processing	20	0.101657	C	1	chromosome	19674	NO	1
pBC	pPC_Library	over300	Gene regulation and genome replication	Cycle regulator	Cycle regulator/LexA-like	6	HBA75_08385	phnT	ABC transporter ATP-binding protein	P	Metabolism	1	0.0105775	C	2	chromosome	9454	NO	6
pBC	pPC_Library	over300	Gene regulation and genome replication	Cycle regulator	Cycle regulator/LexA-like	6	HBA75_11115	atoD	acetate CoA-transferase subunit alpha	I	Metabolism	1	0.0105775	C	2	chromosome	9454	C	1
pBC	pPC_Library	under300	Gene regulation and genome replication	Cycle regulator	Cycle regulator/LexA-like	6	HBA75_11115	atoD	acetate CoA-transferase subunit alpha	I	Metabolism	1	0.00508285	C	2	chromosome	19674	C	1
pBC	pPC_Library	over300	Gene regulation and genome replication	Cycle regulator	Cycle regulator/LexA-like	6	HBA75_18010	hutI	imidazolonepropionase	Q	Metabolism	3	0.0317326	C	2	chromosome	9454	NO	3
pBC	pPC_Library	over300	Gene regulation and genome replication	Cycle regulator	Cycle regulator/LexA-like	6	HBA75_19620	pdhB	pyruvate dehydrogenase complex E1 component subunit beta	C	Metabolism	10	0.105775	C	2	chromosome	9454	C	2
pBC	pPC_Library	under300	Gene regulation and genome replication	Cycle regulator	Cycle regulator/LexA-like	6	HBA75_19620	pdhB	pyruvate dehydrogenase complex E1 component subunit beta	C	Metabolism	1	0.00508285	C	2	chromosome	19674	C	2
pBN	pPC_Library	over300	Gene regulation and genome replication	Cycle regulator	Cycle regulator/LexA-like	6	HBA75_02890	aspA	aspartate ammonia-lyase	E	Metabolism	101	1.02517	B	3	chromosome	9852	C	10
pBC	pPC_Library	over300	Gene regulation and genome replication	Cycle regulator	Cycle regulator/LexA-like	6	HBA75_22900	pheS	phenylalanine--tRNA ligase subunit alpha	J	Information storage and processing	1	0.0105775	C	1	chromosome	9454	NO	2
pBC	pPC_Library	over300	Gene regulation and genome replication	Cycle regulator	Cycle regulator/LexA-like	6	HBA75_24805	pepA	cytosol aminopeptidase	E	Metabolism	528	5.58494	B	3	chromosome	9454	NO	6
pBC	pPC_Library	under300	Gene regulation and genome replication	Cycle regulator	Cycle regulator/LexA-like	6	HBA75_24805	pepA	cytosol aminopeptidase	E	Metabolism	20	0.101657	C	3	chromosome	19674	NO	6
pBC	pPC_Library	over300	Gene regulation and genome replication	Cycle regulator	Cycle regulator/LexA-like	6	HBA75_25140	dapF	diaminopimelate epimerase	E	Metabolism	2	0.0211551	C	1	chromosome	9454	C	1
pBC	pPC_Library	over300	Gene regulation and genome replication	Cycle regulator	Cycle regulator/LexA-like	6	HBA75_26415		phage tail protein	S	Poorly characterized	4	0.0423101	C	1	chromosome	9454	NO	2
pBC	pPC_Library	under300	Gene regulation and genome replication	Cycle regulator	Cycle regulator/LexA-like	6	HBA75_26415		phage tail protein	S	Poorly characterized	6	0.0304971	C	1	chromosome	19674	NO	2
pBC	pPC_Library	over300	Gene regulation and genome replication	Cycle regulator	Cycle regulator/LexA-like	6	HBA75_27930	GDPD	glycerophosphodiester phosphodiesterase	C	Metabolism	5	0.0528877	C	1	chromosome	9454	B	6
pBC	pPC_Library	under300	Gene regulation and genome replication	Cycle regulator	Cycle regulator/LexA-like	6	HBA75_27930	GDPD	glycerophosphodiester phosphodiesterase	C	Metabolism	1	0.00508285	C	1	chromosome	19674	B	6
pBC	pPC_Library	over300	Gene regulation and genome replication	Cycle regulator	Cycle regulator/LexA-like	6	HBA75_30510		phage tail family protein	S	Poorly characterized	120	1.2693	B		pLUSID2	9454	C	6
pBC	pPC_Library	under300	Gene regulation and genome replication	Cycle regulator	Cycle regulator/LexA-like	6	HBA75_30510		phage tail family protein	S	Poorly characterized	486	2.47027	B		pLUSID2	19674	C	6
pBC	pPC_Library	over300	Gene regulation and genome replication	Cycle regulator	Cycle regulator/LexA-like	6	HBA75_30675	fumB	class I fumarate hydratase	C	Metabolism	6	0.0634652	C	2	pLUSID2	9454	C	4
pBC	pPC_Library	under300	Gene regulation and genome replication	Cycle regulator	Cycle regulator/LexA-like	6	HBA75_30675	fumB	class I fumarate hydratase	C	Metabolism	2	0.0101657	C	2	pLUSID2	19674	C	4
pBN	pPC_Library	over300	Gene regulation and genome replication	Cycle regulator	Cycle regulator/LexA-like	6	HBA75_00145	guaB	IMP dehydrogenase	F	Metabolism	1	0.0101502	C	1	chromosome	9852	NO	2
pBN	pPC_Library	over300	Gene regulation and genome replication	Cycle regulator	Cycle regulator/LexA-like	6	HBA75_01145	oppD	ABC transporter ATP-binding protein	P	Metabolism	3	0.0304507	C	2	chromosome	9852	NO	2
pBN	pPC_Library	over300	Gene regulation and genome replication	Cycle regulator	Cycle regulator/LexA-like	6	HBA75_01870	purL	phosphoribosylformylglycinamidine synthase II	F	Metabolism	37	0.375558	B	2	chromosome	9852	NO	5
pBN	pPC_Library	over300	Gene regulation and genome replication	Cycle regulator	Cycle regulator/LexA-like	6	HBA75_03605	thiO	glycine oxidase ThiO	E	Metabolism	39	0.395859	B	1	chromosome	9852	NO	3
pBN	pPC_Library	over300	Gene regulation and genome replication	Cycle regulator	Cycle regulator/LexA-like	6	HBA75_05625	addA	helicase-exonuclease AddAB subunit AddA	L	Information storage and processing	40	0.406009	B	1	chromosome	9852	NO	1
pBN	pPC_Library	over300	Gene regulation and genome replication	Cycle regulator	Cycle regulator/LexA-like	6	HBA75_08385	phnT	ABC transporter ATP-binding protein	P	Metabolism	74	0.751117	B	2	chromosome	9852	NO	6
pBN	pPC_Library	over300	Gene regulation and genome replication	Cycle regulator	Cycle regulator/LexA-like	6	HBA75_11115	atoD	acetate CoA-transferase subunit alpha	I	Metabolism	2	0.0203004	C	2	chromosome	9852	NO	1
pBN	pPC_Library	over300	Gene regulation and genome replication	Cycle regulator	Cycle regulator/LexA-like	6	HBA75_12120		non-ribosomal peptide synthetase	Q	Metabolism	7	0.0710516	C	3	chromosome	9852	NO	4
pBN	pPC_Library	over300	Gene regulation and genome replication	Cycle regulator	Cycle regulator/LexA-like	6	HBA75_15635		AAA family ATPase	L	Information storage and processing	1	0.0101502	C	2	chromosome	9852	NO	1
pBN	pPC_Library	over300	Gene regulation and genome replication	Cycle regulator	Cycle regulator/LexA-like	6	HBA75_19495	pyc	pyruvate carboxylase	C	Metabolism	5	0.0507511	C	1	chromosome	9852	NO	1
pBN	pPC_Library	over300	Gene regulation and genome replication	Cycle regulator	Cycle regulator/LexA-like	6	HBA75_19620	pdhB	pyruvate dehydrogenase complex E1 component subunit beta	C	Metabolism	64	0.649614	B	2	chromosome	9852	NO	2
pBN	pPC_Library	over300	Gene regulation and genome replication	Cycle regulator	Cycle regulator/LexA-like	6	HBA75_22900	pheS	phenylalanine--tRNA ligase subunit alpha	J	Information storage and processing	6	0.0609013	C	1	chromosome	9852	NO	2
pBN	pPC_Library	over300	Gene regulation and genome replication	Cycle regulator	Cycle regulator/LexA-like	6	HBA75_23425	acuC	acetoin utilization protein AcuC	B	Information storage and processing	3	0.0304507	C	3	chromosome	9852	NO	1
pBN	pPC_Library	over300	Gene regulation and genome replication	Cycle regulator	Cycle regulator/LexA-like	6	HBA75_24805	pepA	cytosol aminopeptidase	E	Metabolism	461	4.67925	B	3	chromosome	9852	NO	6
pBN	pPC_Library	over300	Gene regulation and genome replication	Cycle regulator	Cycle regulator/LexA-like	6	HBA75_25140	dapF	diaminopimelate epimerase	E	Metabolism	4	0.0406009	C	1	chromosome	9852	NO	1
pBN	pPC_Library	over300	Gene regulation and genome replication	Cycle regulator	Cycle regulator/LexA-like	6	HBA75_25540	fadM	proline dehydrogenase	E	Metabolism	3	0.0304507	C	2	chromosome	9852	NO	1
pBN	pPC_Library	over300	Gene regulation and genome replication	Cycle regulator	Cycle regulator/LexA-like	6	HBA75_25855	tyrS	tyrosine--tRNA ligase	J	Information storage and processing	2	0.0203004	C	2	chromosome	9852	NO	1
pBC	pPC_Library	over300	Gene regulation and genome replication	Cycle regulator	Cycle regulator/LexA-like	6	HBA75_03595	nrtA	ABC transporter substrate-binding protein	P	Metabolism	583	6.1667	B	3	chromosome	9454	A	31
pBC	pPC_Library	under300	Gene regulation and genome replication	Cycle regulator	Cycle regulator/LexA-like	6	HBA75_03595	nrtA	ABC transporter substrate-binding protein	P	Metabolism	92	0.467622	B	3	chromosome	19674	A	31
pBN	pPC_Library	over300	Gene regulation and genome replication	Cycle regulator	Cycle regulator/LexA-like	6	HBA75_30675	fumB	class I fumarate hydratase	C	Metabolism	8	0.0812018	C	2	pLUSID2	9852	NO	4
pBN	pPC_Library	over300	Gene regulation and genome replication	Cycle regulator	Cycle regulator/LexA-like	6	HBA75_03595	nrtA	ABC transporter substrate-binding protein	P	Metabolism	182	1.84734	B	3	chromosome	9852	A	31
pBN	pPC_Library	over300	Gene regulation and genome replication	Cycle regulator	Cycle regulator/LexA-like	6	HBA75_23575	pepA	M42 family metallopeptidase	G	Metabolism	10	0.101502	C	1	chromosome	9852	NO	3
pBC	pPC_Library	over300	Gene regulation and genome replication	Cycle regulator	Cycle regulator/LexA-like	6	HBA75_23575	pepA	M42 family metallopeptidase	G	Metabolism	1	0.0105775	C	1	chromosome	9454	NO	3
pBC	pPN_Library	over300	Gene regulation and genome replication	Cycle regulator	Cycle regulator/LexA-like	6	HBA75_07665	yppG	spore coat protein	NO		13	0.194204	C	3	chromosome	6694	NO	1
pBC	pPN_Library	over300	Gene regulation and genome replication	Cycle regulator	Cycle regulator/LexA-like	6	HBA75_24455	menF	isochorismate synthase	H	Metabolism	2	0.0298775	C	3	chromosome	6694	NO	2
pBC	pPN_Library	over300	Gene regulation and genome replication	Cycle regulator	Cycle regulator/LexA-like	6	HBA75_26060		endopeptidase	M	Cellular processes and signaling	6	0.0896325	C	4	chromosome	6694	NO	1
pBC	pPN_Library	over300	Gene regulation and genome replication	Cycle regulator	Cycle regulator/LexA-like	6	HBA75_26700		hypothetical protein	NO		1	0.0149388	C		chromosome	6694	NO	1
pBC	pPN_Library	over300	Gene regulation and genome replication	Cycle regulator	Cycle regulator/LexA-like	6	HBA75_27790	mmgA	acetyl-CoA C-acetyltransferase	I	Metabolism	2	0.0298775	C	3	chromosome	6694	NO	2
pBN	pPN_Library	over300	Gene regulation and genome replication	Cycle regulator	Cycle regulator/LexA-like	6	HBA75_26060		endopeptidase	M	Cellular processes and signaling	1	0.0146714	C	4	chromosome	6816	NO	1
pBC	pPC_Library	under300	Gene regulation and genome replication	Cycle regulator	Cycle regulator/LexA-like	6	HBA75_23575	pepA	M42 family metallopeptidase	G	Metabolism	1	0.00508285	C	1	chromosome	19674	NO	3
pBC	pPN_Library	over300	Gene regulation and genome replication	Cycle regulator	Cycle regulator/LexA-like	6	HBA75_03615	thiG	thiazole synthase	H	Metabolism	1	0.0149388	C	2	chromosome	6694	A	25
pBC	pPC_Library	over300	Gene regulation and genome replication	Cycle regulator	Cycle regulator/LexA-like	6	HBA75_03795		DUF3238 domain-containing protein	S	Poorly characterized	12	0.12693	C	1	chromosome	9454	C	12
pBC	pPC_Library	under300	Gene regulation and genome replication	Cycle regulator	Cycle regulator/LexA-like	6	HBA75_03795		DUF3238 domain-containing protein	S	Poorly characterized	3	0.0152486	C	1	chromosome	19674	C	12
pBN	pPC_Library	over300	Gene regulation and genome replication	Cycle regulator	Cycle regulator/LexA-like	6	HBA75_03795		DUF3238 domain-containing protein	S	Poorly characterized	1	0.0101502	C	1	chromosome	9852	C	12
pBC	pPC_Library	under300	Gene regulation and genome replication	Cycle regulator	Cycle regulator/LexA-like	6	HBA75_03905		DUF871 domain-containing protein	S	Poorly characterized	1	0.00508285	C	2	chromosome	19674	C
pBC	pPC_Library	over300	Gene regulation and genome replication	Cycle regulator	Cycle regulator/LexA-like	6	HBA75_04190	yheH	ABC transporter ATP-binding protein	V	Cellular processes and signaling	1	0.0105775	C	3	chromosome	9454	NO
pBC	pPC_Library	over300	Gene regulation and genome replication	Cycle regulator	Cycle regulator/LexA-like	6	HBA75_04365		methyltransferase	L	Information storage and processing	95	1.00487	B	3	chromosome	9454	NO	11
pBC	pPC_Library	under300	Gene regulation and genome replication	Cycle regulator	Cycle regulator/LexA-like	6	HBA75_04365		methyltransferase	L	Information storage and processing	10	0.0508285	C	3	chromosome	19674	NO	11
pBN	pPC_Library	over300	Gene regulation and genome replication	Cycle regulator	Cycle regulator/LexA-like	6	HBA75_04365		methyltransferase	L	Information storage and processing	625	6.34389	B	3	chromosome	9852	NO	11
pBC	pPC_Library	over300	Gene regulation and genome replication	Cycle regulator	Cycle regulator/LexA-like	6	HBA75_04720		alpha/beta fold hydrolase	G	Metabolism	1	0.0105775	C	3	chromosome	9454	NO	11
pBN	pPC_Library	over300	Gene regulation and genome replication	Cycle regulator	Cycle regulator/LexA-like	6	HBA75_04720		alpha/beta fold hydrolase	G	Metabolism	3	0.0304507	C	3	chromosome	9852	NO	11
pBC	pPC_Library	over300	Gene regulation and genome replication	Cycle regulator	Cycle regulator/LexA-like	6	HBA75_05095	oxdD	oxalate decarboxylase family bicupin	G	Metabolism	9	0.0951978	C	3	chromosome	9454	NO	7
pBC	pPC_Library	under300	Gene regulation and genome replication	Cycle regulator	Cycle regulator/LexA-like	6	HBA75_05095	oxdD	oxalate decarboxylase family bicupin	G	Metabolism	2	0.0101657	C	3	chromosome	19674	NO	7
pBN	pPC_Library	over300	Gene regulation and genome replication	Cycle regulator	Cycle regulator/LexA-like	6	HBA75_05095	oxdD	oxalate decarboxylase family bicupin	G	Metabolism	31	0.314657	B	3	chromosome	9852	NO	7
pBC	pPC_Library	over300	Gene regulation and genome replication	Cycle regulator	Cycle regulator/LexA-like	6	HBA75_06415	lutC	lactate utilization protein C	S	Poorly characterized	10	0.105775	C		chromosome	9454	NO
pBC	pPC_Library	under300	Gene regulation and genome replication	Cycle regulator	Cycle regulator/LexA-like	6	HBA75_06415	lutC	lactate utilization protein C	S	Poorly characterized	2	0.0101657	C		chromosome	19674	NO
pBC	pPC_Library	over300	Gene regulation and genome replication	Cycle regulator	Cycle regulator/LexA-like	6	HBA75_06725	dltA	D-alanine--poly(phosphoribitol) ligase subunit DltA	Q	Metabolism	1	0.0105775	C	1	chromosome	9454	NO
pBC	pPC_Library	over300	Gene regulation and genome replication	Cycle regulator	Cycle regulator/LexA-like	6	HBA75_07470	aroC	chorismate synthase	E	Metabolism	1	0.0105775	C		chromosome	9454	NO
pBC	pPC_Library	over300	Gene regulation and genome replication	Cycle regulator	Cycle regulator/LexA-like	6	HBA75_08260	fliM	flagellar motor switch protein FliM	N	Cellular processes and signaling	54	0.571187	B	2	chromosome	9454	B	9
pBC	pPC_Library	under300	Gene regulation and genome replication	Cycle regulator	Cycle regulator/LexA-like	6	HBA75_08260	fliM	flagellar motor switch protein FliM	N	Cellular processes and signaling	9	0.0457457	C	2	chromosome	19674	B	9
pBN	pPC_Library	over300	Gene regulation and genome replication	Cycle regulator	Cycle regulator/LexA-like	6	HBA75_08920	ilvD	dihydroxy-acid dehydratase	E	Metabolism	2	0.0203004	C	2	chromosome	9852	NO
pBN	pPC_Library	over300	Gene regulation and genome replication	Cycle regulator	Cycle regulator/LexA-like	6	HBA75_09015	yceA	rhodanese-related sulfurtransferase	S	Poorly characterized	3	0.0304507	C	1	chromosome	9852	NO
pBC	pPC_Library	over300	Gene regulation and genome replication	Cycle regulator	Cycle regulator/LexA-like	6	HBA75_11325	prpD	2-methylcitrate dehydratase	S	Poorly characterized	1	0.0105775	C	2	chromosome	9454	C	8
pBN	pPC_Library	over300	Gene regulation and genome replication	Cycle regulator	Cycle regulator/LexA-like	6	HBA75_11325	prpD	2-methylcitrate dehydratase	S	Poorly characterized	55	0.558262	B	2	chromosome	9852	NO	8
pBC	pPC_Library	over300	Gene regulation and genome replication	Cycle regulator	Cycle regulator/LexA-like	6	HBA75_11425	entB	isochorismatase family protein	Q	Metabolism	1	0.0105775	C		chromosome	9454	NO
pBC	pPC_Library	over300	Gene regulation and genome replication	Cycle regulator	Cycle regulator/LexA-like	6	HBA75_12125		non-ribosomal peptide synthetase	Q	Metabolism	22	0.232706	C	3	chromosome	9454	NO	8
pBN	pPC_Library	over300	Gene regulation and genome replication	Cycle regulator	Cycle regulator/LexA-like	6	HBA75_12125		non-ribosomal peptide synthetase	Q	Metabolism	273	2.77101	B	3	chromosome	9852	NO	8
pBC	pPC_Library	over300	Gene regulation and genome replication	Cycle regulator	Cycle regulator/LexA-like	6	HBA75_12130		amino acid adenylation domain-containing protein	Q	Metabolism	22	0.232706	C	3	chromosome	9454	NO	8
pBC	pPC_Library	under300	Gene regulation and genome replication	Cycle regulator	Cycle regulator/LexA-like	6	HBA75_12130		amino acid adenylation domain-containing protein	Q	Metabolism	2	0.0101657	C	3	chromosome	19674	NO	8
pBN	pPC_Library	over300	Gene regulation and genome replication	Cycle regulator	Cycle regulator/LexA-like	6	HBA75_12130		amino acid adenylation domain-containing protein	Q	Metabolism	277	2.81161	B	3	chromosome	9852	NO	8
pBC	pPC_Library	over300	Gene regulation and genome replication	Cycle regulator	Cycle regulator/LexA-like	6	HBA75_14680	proB	glutamate 5-kinase	E	Metabolism	75	0.793315	B	1	chromosome	9454	C	15
pBC	pPC_Library	under300	Gene regulation and genome replication	Cycle regulator	Cycle regulator/LexA-like	6	HBA75_14680	proB	glutamate 5-kinase	E	Metabolism	15	0.0762428	C	1	chromosome	19674	C	15
pBN	pPC_Library	over300	Gene regulation and genome replication	Cycle regulator	Cycle regulator/LexA-like	6	HBA75_14680	proB	glutamate 5-kinase	E	Metabolism	1	0.0101502	C	1	chromosome	9852	B	15
pBC	pPC_Library	under300	Gene regulation and genome replication	Cycle regulator	Cycle regulator/LexA-like	6	HBA75_15005	otrA	TetM/TetW/TetO/TetS family tetracycline resistance ribosomal protection protein	J	Information storage and processing	1	0.00508285	C	1	chromosome	19674	NO
pBC	pPC_Library	under300	Gene regulation and genome replication	Cycle regulator	Cycle regulator/LexA-like	6	HBA75_15340	pps	phosphoenolpyruvate synthase	G	Metabolism	1	0.00508285	C	3	chromosome	19674	NO
pBN	pPC_Library	over300	Gene regulation and genome replication	Cycle regulator	Cycle regulator/LexA-like	6	HBA75_15340	pps	phosphoenolpyruvate synthase	G	Metabolism	9	0.091352	C	3	chromosome	9852	NO
pBC	pPC_Library	over300	Gene regulation and genome replication	Cycle regulator	Cycle regulator/LexA-like	6	HBA75_15655		beta-lactamase family protein	V	Cellular processes and signaling	1	0.0105775	C	2	chromosome	9454	NO	8
pBN	pPC_Library	over300	Gene regulation and genome replication	Cycle regulator	Cycle regulator/LexA-like	6	HBA75_15655		beta-lactamase family protein	V	Cellular processes and signaling	5	0.0507511	C	2	chromosome	9852	NO	8
pBC	pPN_Library	over300	Gene regulation and genome replication	Cycle regulator	Cycle regulator/LexA-like	6	HBA75_15745		DHA2 family efflux MFS transporter permease subunit	E	Metabolism	4	0.059755	C	3	chromosome	6694	NO
pBN	pPC_Library	over300	Gene regulation and genome replication	Cycle regulator	Cycle regulator/LexA-like	6	HBA75_16405	rfbG	CDP-glucose 4.6-dehydratase	G	Metabolism	63	0.639464	B	3	chromosome	9852	NO	12
pBN	pPC_Library	over300	Gene regulation and genome replication	Cycle regulator	Cycle regulator/LexA-like	6	HBA75_16495	luxA_2	LLM class oxidoreductase	C	Metabolism	1	0.0101502	C	2	chromosome	9852	NO
pBC	pPN_Library	over300	Gene regulation and genome replication	Cycle regulator	Cycle regulator/LexA-like	6	HBA75_16755		IS3 family transposase	L	Information storage and processing	2	0.0298775	C	2	chromosome	6694	NO
pBN	pPC_Library	over300	Gene regulation and genome replication	Cycle regulator	Cycle regulator/LexA-like	6	HBA75_18635	korA	2-oxoacid:acceptor oxidoreductase subunit alpha	C	Metabolism	4	0.0406009	C	2	chromosome	9852	NO
pBC	pPC_Library	over300	Gene regulation and genome replication	Cycle regulator	Cycle regulator/LexA-like	6	HBA75_18825	infB	translation initiation factor IF-2	J	Information storage and processing	74	0.782737	B	2	chromosome	9454	B	24
pBC	pPC_Library	under300	Gene regulation and genome replication	Cycle regulator	Cycle regulator/LexA-like	6	HBA75_18825	infB	translation initiation factor IF-2	J	Information storage and processing	12	0.0609942	C	2	chromosome	19674	B	24
pBN	pPC_Library	over300	Gene regulation and genome replication	Cycle regulator	Cycle regulator/LexA-like	6	HBA75_18825	infB	translation initiation factor IF-2	J	Information storage and processing	12	0.121803	C	2	chromosome	9852	C	24
pBC	pPC_Library	over300	Gene regulation and genome replication	Cycle regulator	Cycle regulator/LexA-like	6	HBA75_18965	trmD	tRNA (guanosine(37)-N1)-methyltransferase TrmD	J	Information storage and processing	702	7.42543	B	3	chromosome	9454	C	10
pBC	pPC_Library	under300	Gene regulation and genome replication	Cycle regulator	Cycle regulator/LexA-like	6	HBA75_18965	trmD	tRNA (guanosine(37)-N1)-methyltransferase TrmD	J	Information storage and processing	11	0.0559114	C	3	chromosome	19674	C	10
pBN	pPC_Library	over300	Gene regulation and genome replication	Cycle regulator	Cycle regulator/LexA-like	6	HBA75_18965	trmD	tRNA (guanosine(37)-N1)-methyltransferase TrmD	J	Information storage and processing	1218	12.363	A	3	chromosome	9852	NO	10
pBC	pPN_Library	over300	Gene regulation and genome replication	Cycle regulator	Cycle regulator/LexA-like	6	HBA75_19290	ftsZ	cell division protein FtsZ	D	Cellular processes and signaling	5155	77.0093	A	2	chromosome	6694	B	24
pBC	pPC_Library	over300	Gene regulation and genome replication	Cycle regulator	Cycle regulator/LexA-like	6	HBA75_19295	ftsA	cell division protein FtsA	D	Cellular processes and signaling	598	6.32536	B	3	chromosome	9454	A	31
pBC	pPC_Library	under300	Gene regulation and genome replication	Cycle regulator	Cycle regulator/LexA-like	6	HBA75_19295	ftsA	cell division protein FtsA	D	Cellular processes and signaling	1	0.00508285	C	3	chromosome	19674	A	31
pBN	pPC_Library	over300	Gene regulation and genome replication	Cycle regulator	Cycle regulator/LexA-like	6	HBA75_19295	ftsA	cell division protein FtsA	D	Cellular processes and signaling	669	6.7905	B	3	chromosome	9852	C	31
pBC	pPC_Library	over300	Gene regulation and genome replication	Cycle regulator	Cycle regulator/LexA-like	6	HBA75_20760	accC	acetyl-CoA carboxylase biotin carboxylase subunit	I	Metabolism	1	0.0105775	C	2	chromosome	9454	C
pBC	pPN_Library	over300	Gene regulation and genome replication	Cycle regulator	Cycle regulator/LexA-like	6	HBA75_21065		helix-turn-helix domain-containing protein	K	Information storage and processing	13	0.194204	C	2	chromosome	6694	NO
pBC	pPC_Library	over300	Gene regulation and genome replication	Cycle regulator	Cycle regulator/LexA-like	6	HBA75_21125	metB	cystathionine gamma-synthase/O-acetylhomoserine thiolyase	E	Metabolism	22	0.232706	C	2	chromosome	9454	C	8
pBC	pPC_Library	under300	Gene regulation and genome replication	Cycle regulator	Cycle regulator/LexA-like	6	HBA75_21125	metB	cystathionine gamma-synthase/O-acetylhomoserine thiolyase	E	Metabolism	16	0.0813256	C	2	chromosome	19674	C	8
pBN	pPC_Library	over300	Gene regulation and genome replication	Cycle regulator	Cycle regulator/LexA-like	6	HBA75_21125	metB	cystathionine gamma-synthase/O-acetylhomoserine thiolyase	E	Metabolism	68	0.690215	B	2	chromosome	9852	NO	8
pBC	pPC_Library	under300	Gene regulation and genome replication	Cycle regulator	Cycle regulator/LexA-like	6	HBA75_21275	nfo	deoxyribonuclease IV	L	Information storage and processing	1	0.00508285	C	2	chromosome	19674	C
pBC	pPC_Library	over300	Gene regulation and genome replication	Cycle regulator	Cycle regulator/LexA-like	6	HBA75_22945	ysdC	M42 family metallopeptidase	G	Metabolism	2514	26.5919	A	3	chromosome	9454	A	34
pBC	pPC_Library	under300	Gene regulation and genome replication	Cycle regulator	Cycle regulator/LexA-like	6	HBA75_22945	ysdC	M42 family metallopeptidase	G	Metabolism	16	0.0813256	C	3	chromosome	19674	A	34
pBN	pPC_Library	over300	Gene regulation and genome replication	Cycle regulator	Cycle regulator/LexA-like	6	HBA75_22945	ysdC	M42 family metallopeptidase	G	Metabolism	467	4.74015	B	3	chromosome	9852	A	34
pBC	pPC_Library	over300	Gene regulation and genome replication	Cycle regulator	Cycle regulator/LexA-like	6	HBA75_23085	pyk	pyruvate kinase	G	Metabolism	176	1.86165	B	3	chromosome	9454	B	26
pBC	pPC_Library	under300	Gene regulation and genome replication	Cycle regulator	Cycle regulator/LexA-like	6	HBA75_23085	pyk	pyruvate kinase	G	Metabolism	3	0.0152486	C	3	chromosome	19674	B	26
pBN	pPC_Library	over300	Gene regulation and genome replication	Cycle regulator	Cycle regulator/LexA-like	6	HBA75_23085	pyk	pyruvate kinase	G	Metabolism	441	4.47625	B	3	chromosome	9852	C	26
pBC	pPC_Library	over300	Gene regulation and genome replication	Cycle regulator	Cycle regulator/LexA-like	6	HBA75_23535	pncB	nicotinate phosphoribosyltransferase	H	Metabolism	79	0.835625	B	2	chromosome	9454	NO	8
pBC	pPC_Library	under300	Gene regulation and genome replication	Cycle regulator	Cycle regulator/LexA-like	6	HBA75_23535	pncB	nicotinate phosphoribosyltransferase	H	Metabolism	4	0.0203314	C	2	chromosome	19674	NO	8
pBN	pPC_Library	over300	Gene regulation and genome replication	Cycle regulator	Cycle regulator/LexA-like	6	HBA75_23535	pncB	nicotinate phosphoribosyltransferase	H	Metabolism	1397	14.1799	A	2	chromosome	9852	NO	8
pBC	pPC_Library	over300	Gene regulation and genome replication	Cycle regulator	Cycle regulator/LexA-like	6	HBA75_23625	pepV	dipeptidase PepV	E	Metabolism	410	4.33679	B	2	chromosome	9454	B	29
pBC	pPC_Library	under300	Gene regulation and genome replication	Cycle regulator	Cycle regulator/LexA-like	6	HBA75_23625	pepV	dipeptidase PepV	E	Metabolism	22	0.111823	C	2	chromosome	19674	B	29
pBN	pPC_Library	over300	Gene regulation and genome replication	Cycle regulator	Cycle regulator/LexA-like	6	HBA75_23625	pepV	dipeptidase PepV	E	Metabolism	1	0.0101502	C	2	chromosome	9852	C	29
pBN	pPC_Library	over300	Gene regulation and genome replication	Cycle regulator	Cycle regulator/LexA-like	6	HBA75_23815	leuS	leucine--tRNA ligase	J	Information storage and processing	1	0.0101502	C	1	chromosome	9852	NO
pBC	pPC_Library	over300	Gene regulation and genome replication	Cycle regulator	Cycle regulator/LexA-like	6	HBA75_24040		recombinase family protein	NO		4	0.0423101	C	1	chromosome	9454	NO
pBC	pPC_Library	under300	Gene regulation and genome replication	Cycle regulator	Cycle regulator/LexA-like	6	HBA75_24040		recombinase family protein	NO		2	0.0101657	C	1	chromosome	19674	NO
pBN	pPC_Library	over300	Gene regulation and genome replication	Cycle regulator	Cycle regulator/LexA-like	6	HBA75_24040		recombinase family protein	NO		5	0.0507511	C	1	chromosome	9852	NO
pBC	pPN_Library	over300	Gene regulation and genome replication	Cycle regulator	Cycle regulator/LexA-like	6	HBA75_24460	menA	1.4-dihydroxy-2-naphthoate polyprenyltransferase	H	Metabolism	2	0.0298775	C	2	chromosome	6694	NO
pBN	pPC_Library	over300	Gene regulation and genome replication	Cycle regulator	Cycle regulator/LexA-like	6	HBA75_24670	pgi	glucose-6-phosphate isomerase	G	Metabolism	18	0.182704	C	1	chromosome	9852	NO
pBC	pPC_Library	over300	Gene regulation and genome replication	Cycle regulator	Cycle regulator/LexA-like	6	HBA75_24840	yobU	AraC family transcriptional regulator	K	Information storage and processing	1	0.0105775	C	1	chromosome	9454	C
pBC	pPC_Library	under300	Gene regulation and genome replication	Cycle regulator	Cycle regulator/LexA-like	6	HBA75_24840	yobU	AraC family transcriptional regulator	K	Information storage and processing	1	0.00508285	C	1	chromosome	19674	C
pBN	pPC_Library	over300	Gene regulation and genome replication	Cycle regulator	Cycle regulator/LexA-like	6	HBA75_24840	yobU	AraC family transcriptional regulator	K	Information storage and processing	1	0.0101502	C	1	chromosome	9852	NO
pBC	pPC_Library	over300	Gene regulation and genome replication	Cycle regulator	Cycle regulator/LexA-like	6	HBA75_25400	sufB	Fe-S cluster assembly protein SufB	O	Cellular processes and signaling	5	0.0528877	C	3	chromosome	9454	C	16
pBN	pPC_Library	over300	Gene regulation and genome replication	Cycle regulator	Cycle regulator/LexA-like	6	HBA75_25400	sufB	Fe-S cluster assembly protein SufB	O	Cellular processes and signaling	62	0.629314	B	3	chromosome	9852	NO	16
pBN	pPC_Library	over300	Gene regulation and genome replication	Cycle regulator	Cycle regulator/LexA-like	6	HBA75_25680		class I SAM-dependent methyltransferase	H	Metabolism	2	0.0203004	C	2	chromosome	9852	NO
pBC	pPC_Library	over300	Gene regulation and genome replication	Cycle regulator	Cycle regulator/LexA-like	6	HBA75_26335	cggR	gapA transcriptional regulator CggR	K	Information storage and processing	24	0.253861	B	2	chromosome	9454	NO	9
pBC	pPC_Library	under300	Gene regulation and genome replication	Cycle regulator	Cycle regulator/LexA-like	6	HBA75_26335	cggR	gapA transcriptional regulator CggR	K	Information storage and processing	4	0.0203314	C	2	chromosome	19674	NO	9
pBN	pPC_Library	over300	Gene regulation and genome replication	Cycle regulator	Cycle regulator/LexA-like	6	HBA75_26335	cggR	gapA transcriptional regulator CggR	K	Information storage and processing	394	3.99919	B	2	chromosome	9852	NO	9
pBC	pPC_Library	over300	Gene regulation and genome replication	Cycle regulator	Cycle regulator/LexA-like	6	HBA75_27005	celR	sigma 54-interacting transcriptional regulator	K	Information storage and processing	1	0.0105775	C	2	chromosome	9454	NO
pBC	pPC_Library	over300	Gene regulation and genome replication	Cycle regulator	Cycle regulator/LexA-like	6	HBA75_28230		ABC-F family ATP-binding cassette domain-containing protein	S	Poorly characterized	1	0.0105775	C	2	chromosome	9454	NO
pBN	pPC_Library	over300	Gene regulation and genome replication	Cycle regulator	Cycle regulator/LexA-like	6	HBA75_28230		ABC-F family ATP-binding cassette domain-containing protein	S	Poorly characterized	3	0.0304507	C	2	chromosome	9852	NO
pBC	pPC_Library	over300	Gene regulation and genome replication	Cycle regulator	Cycle regulator/LexA-like	6	HBA75_28485	yyaC	spore protease YyaC	S	Poorly characterized	12	0.12693	C	1	chromosome	9454	NO
pBC	pPC_Library	under300	Gene regulation and genome replication	Cycle regulator	Cycle regulator/LexA-like	6	HBA75_28485	yyaC	spore protease YyaC	S	Poorly characterized	22	0.111823	C	1	chromosome	19674	NO
pBC	pPC_Library	over300	Gene regulation and genome replication	Cycle regulator	Cycle regulator/LexA-like	6	HBA75_29430		PhzF family phenazine biosynthesis protein	S	Poorly characterized	2	0.0211551	C	1	pLUSID1	9454	NO
pBC	pPC_Library	under300	Gene regulation and genome replication	Cycle regulator	Cycle regulator/LexA-like	6	HBA75_29430		PhzF family phenazine biosynthesis protein	S	Poorly characterized	2	0.0101657	C	1	pLUSID1	19674	NO
pBN	pPC_Library	over300	Gene regulation and genome replication	Cycle regulator	Cycle regulator/LexA-like	6	HBA75_29430		PhzF family phenazine biosynthesis protein	S	Poorly characterized	3	0.0304507	C	1	pLUSID1	9852	NO
pBC	pPC_Library	over300	Gene regulation and genome replication	Cycle regulator	Cycle regulator/LexA-like	6	HBA75_30450		dipeptide epimerase	M	Cellular processes and signaling	294	3.10979	B	3	pLUSID2	9454	A	31
pBC	pPC_Library	under300	Gene regulation and genome replication	Cycle regulator	Cycle regulator/LexA-like	6	HBA75_30450		dipeptide epimerase	M	Cellular processes and signaling	5	0.0254143	C	3	pLUSID2	19674	A	31
pBN	pPC_Library	over300	Gene regulation and genome replication	Cycle regulator	Cycle regulator/LexA-like	6	HBA75_30450		dipeptide epimerase	M	Cellular processes and signaling	123	1.24848	B	3	pLUSID2	9852	A	31
pBC	pPC_Library	over300	Gene regulation and genome replication	Cycle regulator	Cycle regulator/LexA-like	6	HBA75_30635		IS110 family transposase	L	Information storage and processing	21	0.222128	C	4	pLUSID2	9454	NO	9
pBN	pPC_Library	over300	Gene regulation and genome replication	Cycle regulator	Cycle regulator/LexA-like	6	HBA75_30635		IS110 family transposase	L	Information storage and processing	498	5.05481	B	4	pLUSID2	9852	NO	9
pBN	pPC_Library	over300	Gene regulation and genome replication	Cycle regulator	Cycle regulator/LexA-like	6	HBA75_30685	yfkA	radical SAM/CxCxxxxC motif protein YfkAB	S	Poorly characterized	202	2.05035	B	3	pLUSID2	9852	NO	7
pBC	pPC_Library	over300	Gene regulation and genome replication	Cycle regulator	Cycle regulator/LexA-like	6	HBA75_30720		IS4 family transposase	L	Information storage and processing	1187	12.5555	A	3	pLUSID2	9454	B	29
pBC	pPC_Library	under300	Gene regulation and genome replication	Cycle regulator	Cycle regulator/LexA-like	6	HBA75_30720		IS4 family transposase	L	Information storage and processing	9	0.0457457	C	3	pLUSID2	19674	B	29
pBN	pPC_Library	over300	Gene regulation and genome replication	Cycle regulator	Cycle regulator/LexA-like	6	HBA75_30720		IS4 family transposase	L	Information storage and processing	3	0.0304507	C	3	pLUSID2	9852	B	29
pBN	pPN_Library	over300	Gene regulation and genome replication	Cycle regulator	Cycle regulator	7	HBA75_00740	rpsG	30S ribosomal protein S7	J	Information storage and processing	4	0.0271961	C	2	chromosome	14708	NO
pBN	pPN_Library	under300	Gene regulation and genome replication	Cycle regulator	Cycle regulator	7	HBA75_00740	rpsG	30S ribosomal protein S7	J	Information storage and processing	1	0.00452878	C	2	chromosome	22081	NO
pBC	pPN_Library	over300	Gene regulation and genome replication	Cycle regulator	Cycle regulator	7	HBA75_31050	recA	recombinase RecA	L	Information storage and processing	113	0.779095	B	2	pLUSID3	14504	B	4
pBC	pPC_Library	over300	Gene regulation and genome replication	Cycle regulator	Cycle regulator	7	HBA75_00745	fusA	elongation factor G	J	Information storage and processing	4	0.0361468	C	2	chromosome	11066	C	10
pBC	pPN_Library	over300	Gene regulation and genome replication	Cycle regulator	Cycle regulator	7	HBA75_00745	fusA	elongation factor G	J	Information storage and processing	1	0.00689465	C	4	chromosome	14504	C	10
pBC	pPC_Library	over300	Gene regulation and genome replication	Cycle regulator	Cycle regulator	7	HBA75_01455	alr	alanine racemase	E	Metabolism	24	0.216881	C	2	chromosome	11066	B	30
pBC	pPC_Library	under300	Gene regulation and genome replication	Cycle regulator	Cycle regulator	7	HBA75_01455	alr	alanine racemase	E	Metabolism	370	2.64342	B	2	chromosome	13997	B	30
pBN	pPC_Library	over300	Gene regulation and genome replication	Cycle regulator	Cycle regulator	7	HBA75_01455	alr	alanine racemase	E	Metabolism	87	0.790119	B	2	chromosome	11011	B	30
pBC	pPN_Library	under300	Gene regulation and genome replication	Cycle regulator	Cycle regulator	7	HBA75_01455	alr	alanine racemase	E	Metabolism	8	0.00568735	C		chromosome	140663	NO	30
pBC	pPN_Library	under300	Gene regulation and genome replication	Cycle regulator	Cycle regulator	7	HBA75_01480	ydcK	SprT family protein	S	Poorly characterized	10	0.00710919	C		chromosome	140663	NO
pBN	pPN_Library	over300	Gene regulation and genome replication	Cycle regulator	Cycle regulator	7	HBA75_02890	aspA	aspartate ammonia-lyase	E	Metabolism	13	0.0883873	C	3	chromosome	14708	NO	10
pBN	pPN_Library	under300	Gene regulation and genome replication	Cycle regulator	Cycle regulator	7	HBA75_02890	aspA	aspartate ammonia-lyase	E	Metabolism	2	0.00905756	C	3	chromosome	22081	NO	10
pBC	pPC_Library	over300	Gene regulation and genome replication	Cycle regulator	Cycle regulator	7	HBA75_03595	nrtA	ABC transporter substrate-binding protein	P	Metabolism	1053	9.51563	B	3	chromosome	11066	A	31
pBC	pPC_Library	under300	Gene regulation and genome replication	Cycle regulator	Cycle regulator	7	HBA75_03595	nrtA	ABC transporter substrate-binding protein	P	Metabolism	17	0.121455	C	3	chromosome	13997	A	31
pBN	pPC_Library	over300	Gene regulation and genome replication	Cycle regulator	Cycle regulator	7	HBA75_03595	nrtA	ABC transporter substrate-binding protein	P	Metabolism	3686	33.4756	A	3	chromosome	11011	A	31
pBC	pPC_Library	over300	Gene regulation and genome replication	Cycle regulator	Cycle regulator	7	HBA75_11115	atoD	acetate CoA-transferase subunit alpha	I	Metabolism	13	0.117477	C	2	chromosome	11066	C	1
pBC	pPC_Library	under300	Gene regulation and genome replication	Cycle regulator	Cycle regulator	7	HBA75_11115	atoD	acetate CoA-transferase subunit alpha	I	Metabolism	3	0.0214332	C	2	chromosome	13997	C	1
pBC	pPC_Library	over300	Gene regulation and genome replication	Cycle regulator	Cycle regulator	7	HBA75_22900	pheS	phenylalanine--tRNA ligase subunit alpha	J	Information storage and processing	9	0.0813302	C	1	chromosome	11066	NO	2
pBC	pPC_Library	under300	Gene regulation and genome replication	Cycle regulator	Cycle regulator	7	HBA75_22900	pheS	phenylalanine--tRNA ligase subunit alpha	J	Information storage and processing	1	0.00714439	C	1	chromosome	13997	NO	2
pBC	pPC_Library	over300	Gene regulation and genome replication	Cycle regulator	Cycle regulator	7	HBA75_26415		phage tail protein	S	Poorly characterized	3	0.0271101	C	1	chromosome	11066	NO	2
pBC	pPC_Library	under300	Gene regulation and genome replication	Cycle regulator	Cycle regulator	7	HBA75_26415		phage tail protein	S	Poorly characterized	19	0.135743	C	1	chromosome	13997	NO	2
pBC	pPC_Library	over300	Gene regulation and genome replication	Cycle regulator	Cycle regulator	7	HBA75_27930	GDPD	glycerophosphodiester phosphodiesterase	C	Metabolism	6	0.0542201	C	1	chromosome	11066	B	6
pBC	pPC_Library	under300	Gene regulation and genome replication	Cycle regulator	Cycle regulator	7	HBA75_27930	GDPD	glycerophosphodiester phosphodiesterase	C	Metabolism	1	0.00714439	C	1	chromosome	13997	B	6
pBC	pPC_Library	over300	Gene regulation and genome replication	Cycle regulator	Cycle regulator	7	HBA75_30510		phage tail family protein	S	Poorly characterized	2	0.0180734	C		pLUSID2	11066	C	6
pBC	pPC_Library	under300	Gene regulation and genome replication	Cycle regulator	Cycle regulator	7	HBA75_30510		phage tail family protein	S	Poorly characterized	3	0.0214332	C		pLUSID2	13997	C	6
pBN	pPC_Library	over300	Gene regulation and genome replication	Cycle regulator	Cycle regulator	7	HBA75_00145	guaB	IMP dehydrogenase	F	Metabolism	3	0.0272455	C	1	chromosome	11011	NO	2
pBN	pPC_Library	over300	Gene regulation and genome replication	Cycle regulator	Cycle regulator	7	HBA75_22050	ompR	response regulator transcription factor	T	Cellular processes and signaling	1	0.00908183	C	2	chromosome	11011	NO	1
pBN	pPC_Library	over300	Gene regulation and genome replication	Cycle regulator	Cycle regulator	7	HBA75_24805	pepA	cytosol aminopeptidase	E	Metabolism	1	0.00908183	C	3	chromosome	11011	NO	6
pBC	pPN_Library	over300	Gene regulation and genome replication	Cycle regulator	Cycle regulator	7	HBA75_00835	rplF	50S ribosomal protein L6	J	Information storage and processing	3	0.0206839	C	2	chromosome	14504	B	1
pBC	pPN_Library	under300	Gene regulation and genome replication	Cycle regulator	Cycle regulator	7	HBA75_00835	rplF	50S ribosomal protein L6	J	Information storage and processing	5	0.0035546	C	2	chromosome	140663	B	1
pBC	pPN_Library	over300	Gene regulation and genome replication	Cycle regulator	Cycle regulator	7	HBA75_04360	amiD2	amidase	M	Cellular processes and signaling	1	0.00689465	C	2	chromosome	14504	C	1
pBC	pPN_Library	under300	Gene regulation and genome replication	Cycle regulator	Cycle regulator	7	HBA75_04360	amiD2	amidase	M	Cellular processes and signaling	5	0.0035546	C	2	chromosome	140663	C	1
pBC	pPN_Library	over300	Gene regulation and genome replication	Cycle regulator	Cycle regulator	7	HBA75_06105	putP	sodium/proline symporter PutP	E	Metabolism	2	0.0137893	C	4	chromosome	14504	NO	2
pBC	pPN_Library	under300	Gene regulation and genome replication	Cycle regulator	Cycle regulator	7	HBA75_06105	putP	sodium/proline symporter PutP	E	Metabolism	1	0.000710919	C	4	chromosome	140663	NO	2
pBC	pPN_Library	over300	Gene regulation and genome replication	Cycle regulator	Cycle regulator	7	HBA75_12045	pepD	beta-Ala-His dipeptidase	E	Metabolism	8	0.0551572	C	2	chromosome	14504	C	4
pBC	pPN_Library	under300	Gene regulation and genome replication	Cycle regulator	Cycle regulator	7	HBA75_12045	pepD	beta-Ala-His dipeptidase	E	Metabolism	25	0.017773	C	2	chromosome	140663	C	4
pBC	pPN_Library	under300	Gene regulation and genome replication	Cycle regulator	Cycle regulator	7	HBA75_18215	lexA	transcriptional repressor LexA	K	Information storage and processing	1	0.000710919	C	1	chromosome	140663	NO	2
pBC	pPN_Library	over300	Gene regulation and genome replication	Cycle regulator	Cycle regulator	7	HBA75_19390	ylbL	PDZ domain-containing protein	T	Cellular processes and signaling	1	0.00689465	C	1	chromosome	14504	C	1
pBC	pPN_Library	under300	Gene regulation and genome replication	Cycle regulator	Cycle regulator	7	HBA75_19390	ylbL	PDZ domain-containing protein	T	Cellular processes and signaling	2	0.00142184	C	1	chromosome	140663	C	1
pBC	pPN_Library	under300	Gene regulation and genome replication	Cycle regulator	Cycle regulator	7	HBA75_22900	pheS	phenylalanine--tRNA ligase subunit alpha	J	Information storage and processing	3	0.00213276	C	1	chromosome	140663	C	2
pBC	pPN_Library	under300	Gene regulation and genome replication	Cycle regulator	Cycle regulator	7	HBA75_25320	glpX	class II fructose-bisphosphatase	G	Metabolism	4	0.00284368	C	2	chromosome	140663	B	1
pBC	pPN_Library	over300	Gene regulation and genome replication	Cycle regulator	Cycle regulator	7	HBA75_25845	yjlC	DUF1641 domain-containing protein	S	Poorly characterized	1	0.00689465	C	3	chromosome	14504	C	2
pBC	pPN_Library	under300	Gene regulation and genome replication	Cycle regulator	Cycle regulator	7	HBA75_25845	yjlC	DUF1641 domain-containing protein	S	Poorly characterized	3	0.00213276	C	3	chromosome	140663	C	2
pBC	pPN_Library	over300	Gene regulation and genome replication	Cycle regulator	Cycle regulator	7	HBA75_26390	virB5	peptidase S74	U	Cellular processes and signaling	1	0.00689465	C	3	chromosome	14504	NO	1
pBC	pPN_Library	under300	Gene regulation and genome replication	Cycle regulator	Cycle regulator	7	HBA75_26395		phage tail family protein	S	Poorly characterized	4	0.00284368	C	2	chromosome	140663	C	2
pBC	pPN_Library	over300	Gene regulation and genome replication	Cycle regulator	Cycle regulator	7	HBA75_27025	licH	6-phospho-beta-glucosidase	G	Metabolism	24	0.165472	C	2	chromosome	14504	B	3
pBC	pPN_Library	under300	Gene regulation and genome replication	Cycle regulator	Cycle regulator	7	HBA75_27025	licH	6-phospho-beta-glucosidase	G	Metabolism	126	0.0895758	C	2	chromosome	140663	B	3
pBC	pPN_Library	over300	Gene regulation and genome replication	Cycle regulator	Cycle regulator	7	HBA75_03615	thiG	thiazole synthase	H	Metabolism	4484	30.9156	A	2	chromosome	14504	A	25
pBC	pPN_Library	under300	Gene regulation and genome replication	Cycle regulator	Cycle regulator	7	HBA75_03615	thiG	thiazole synthase	H	Metabolism	195	0.138629	C	2	chromosome	140663	A	25
pBN	pPN_Library	over300	Gene regulation and genome replication	Cycle regulator	Cycle regulator	7	HBA75_03615	thiG	thiazole synthase	H	Metabolism	716	4.8681	B	2	chromosome	14708	A	25
pBN	pPN_Library	under300	Gene regulation and genome replication	Cycle regulator	Cycle regulator	7	HBA75_03615	thiG	thiazole synthase	H	Metabolism	5	0.0226439	C	2	chromosome	22081	A	25
pBN	pPN_Library	over300	Gene regulation and genome replication	Cycle regulator	Cycle regulator	7	HBA75_03925	bacG	efflux RND transporter periplasmic adaptor subunit	M	Cellular processes and signaling	1	0.00679902	C	1	chromosome	14708	NO	1
pBN	pPN_Library	under300	Gene regulation and genome replication	Cycle regulator	Cycle regulator	7	HBA75_04360	amiD2	amidase	M	Cellular processes and signaling	1	0.00452878	C	2	chromosome	22081	NO	1
pBN	pPN_Library	over300	Gene regulation and genome replication	Cycle regulator	Cycle regulator	7	HBA75_18215	lexA	transcriptional repressor LexA	K	Information storage and processing	39	0.265162	B	1	chromosome	14708	NO	2
pBN	pPN_Library	under300	Gene regulation and genome replication	Cycle regulator	Cycle regulator	7	HBA75_18215	lexA	transcriptional repressor LexA	K	Information storage and processing	3	0.0135863	C	1	chromosome	22081	NO	2
pBN	pPN_Library	over300	Gene regulation and genome replication	Cycle regulator	Cycle regulator	7	HBA75_19390	ylbL	PDZ domain-containing protein	T	Cellular processes and signaling	2	0.013598	C	1	chromosome	14708	B	1
pBN	pPN_Library	under300	Gene regulation and genome replication	Cycle regulator	Cycle regulator	7	HBA75_19390	ylbL	PDZ domain-containing protein	T	Cellular processes and signaling	1	0.00452878	C	1	chromosome	22081	B	1
pBC	pPC_Library	over300	Gene regulation and genome replication	Cycle regulator	Cycle regulator	7	HBA75_03795		DUF3238 domain-containing protein	S	Poorly characterized	20	0.180734	C	1	chromosome	11066	C	12
pBC	pPC_Library	under300	Gene regulation and genome replication	Cycle regulator	Cycle regulator	7	HBA75_03795		DUF3238 domain-containing protein	S	Poorly characterized	7	0.0500107	C	1	chromosome	13997	C	12
pBN	pPC_Library	over300	Gene regulation and genome replication	Cycle regulator	Cycle regulator	7	HBA75_03795		DUF3238 domain-containing protein	S	Poorly characterized	1	0.00908183	C	1	chromosome	11011	C	12
pBC	pPN_Library	over300	Gene regulation and genome replication	Cycle regulator	Cycle regulator	7	HBA75_03795		DUF3238 domain-containing protein	S	Poorly characterized	5	0.0344732	C	2	chromosome	14504	C	12
pBC	pPN_Library	under300	Gene regulation and genome replication	Cycle regulator	Cycle regulator	7	HBA75_03795		DUF3238 domain-containing protein	S	Poorly characterized	58	0.0412333	C	2	chromosome	140663	C	12
pBN	pPC_Library	over300	Gene regulation and genome replication	Cycle regulator	Cycle regulator	7	HBA75_04720		alpha/beta fold hydrolase	G	Metabolism	3	0.0272455	C	3	chromosome	11011	NO	11
pBC	pPN_Library	over300	Gene regulation and genome replication	Cycle regulator	Cycle regulator	7	HBA75_07470	aroC	chorismate synthase	E	Metabolism	2	0.0137893	C	1	chromosome	14504	C
pBC	pPN_Library	under300	Gene regulation and genome replication	Cycle regulator	Cycle regulator	7	HBA75_07470	aroC	chorismate synthase	E	Metabolism	89	0.0632718	C	1	chromosome	140663	C
pBC	pPN_Library	under300	Gene regulation and genome replication	Cycle regulator	Cycle regulator	7	HBA75_08205	flgE	flagellar hook protein FlgE	N	Cellular processes and signaling	1	0.000710919	C	2	chromosome	140663	C
pBC	pPC_Library	over300	Gene regulation and genome replication	Cycle regulator	Cycle regulator	7	HBA75_08260	fliM	flagellar motor switch protein FliM	N	Cellular processes and signaling	10	0.0903669	C	2	chromosome	11066	B	9
pBC	pPC_Library	under300	Gene regulation and genome replication	Cycle regulator	Cycle regulator	7	HBA75_08260	fliM	flagellar motor switch protein FliM	N	Cellular processes and signaling	5	0.0357219	C	2	chromosome	13997	B	9
pBN	pPC_Library	over300	Gene regulation and genome replication	Cycle regulator	Cycle regulator	7	HBA75_08260	fliM	flagellar motor switch protein FliM	N	Cellular processes and signaling	1	0.00908183	C	2	chromosome	11011	NO	9
pBC	pPN_Library	under300	Gene regulation and genome replication	Cycle regulator	Cycle regulator	7	HBA75_08740	lysC	aspartate kinase	E	Metabolism	1	0.000710919	C	2	chromosome	140663	C
pBC	pPC_Library	over300	Gene regulation and genome replication	Cycle regulator	Cycle regulator	7	HBA75_11325	prpD	2-methylcitrate dehydratase	S	Poorly characterized	1	0.00903669	C	2	chromosome	11066	C	8
pBN	pPC_Library	over300	Gene regulation and genome replication	Cycle regulator	Cycle regulator	7	HBA75_11325	prpD	2-methylcitrate dehydratase	S	Poorly characterized	2	0.0181637	C	2	chromosome	11011	NO	8
pBC	pPC_Library	over300	Gene regulation and genome replication	Cycle regulator	Cycle regulator	7	HBA75_14680	proB	glutamate 5-kinase	E	Metabolism	30	0.271101	B	1	chromosome	11066	C	15
pBC	pPC_Library	under300	Gene regulation and genome replication	Cycle regulator	Cycle regulator	7	HBA75_14680	proB	glutamate 5-kinase	E	Metabolism	8	0.0571551	C	1	chromosome	13997	C	15
pBN	pPC_Library	over300	Gene regulation and genome replication	Cycle regulator	Cycle regulator	7	HBA75_14680	proB	glutamate 5-kinase	E	Metabolism	61	0.553991	B	1	chromosome	11011	B	15
pBN	pPN_Library	over300	Gene regulation and genome replication	Cycle regulator	Cycle regulator	7	HBA75_31050	recA	recombinase RecA	L	Information storage and processing	11	0.0747892	C	2	pLUSID3	14708	B	4
pBC	pPN_Library	under300	Gene regulation and genome replication	Cycle regulator	Cycle regulator	7	HBA75_31050	recA	recombinase RecA	L	Information storage and processing	101	0.0718028	C	2	pLUSID3	140663	B	4
pBN	pPC_Library	over300	Gene regulation and genome replication	Cycle regulator	Cycle regulator	7	HBA75_15655		beta-lactamase family protein	V	Cellular processes and signaling	210	1.90718	B	2	chromosome	11011	NO	8
pBC	pPC_Library	over300	Gene regulation and genome replication	Cycle regulator	Cycle regulator	7	HBA75_18825	infB	translation initiation factor IF-2	J	Information storage and processing	1922	17.3685	A	2	chromosome	11066	B	24
pBC	pPC_Library	under300	Gene regulation and genome replication	Cycle regulator	Cycle regulator	7	HBA75_18825	infB	translation initiation factor IF-2	J	Information storage and processing	93	0.664428	B	2	chromosome	13997	B	24
pBN	pPC_Library	over300	Gene regulation and genome replication	Cycle regulator	Cycle regulator	7	HBA75_18825	infB	translation initiation factor IF-2	J	Information storage and processing	1	0.00908183	C	2	chromosome	11011	C	24
pBC	pPN_Library	over300	Gene regulation and genome replication	Cycle regulator	Cycle regulator	7	HBA75_18825	infB	translation initiation factor IF-2	J	Information storage and processing	650	4.48152	B	2	chromosome	14504	B	24
pBC	pPN_Library	under300	Gene regulation and genome replication	Cycle regulator	Cycle regulator	7	HBA75_18825	infB	translation initiation factor IF-2	J	Information storage and processing	836	0.594328	B	2	chromosome	140663	B	24
pBC	pPN_Library	under300	Gene regulation and genome replication	Cycle regulator	Cycle regulator	7	HBA75_19180	pyrD	dihydroorotate oxidase B catalytic subunit	F	Metabolism	6	0.00426551	C	2	chromosome	140663	C
pBC	pPC_Library	under300	Gene regulation and genome replication	Cycle regulator	Cycle regulator	7	HBA75_19185	pyrK	dihydroorotate oxidase B electron transfer subunit	C	Metabolism	1	0.00714439	C	1	chromosome	13997	NO
pBC	pPN_Library	over300	Gene regulation and genome replication	Cycle regulator	Cycle regulator	7	HBA75_19290	ftsZ	cell division protein FtsZ	D	Cellular processes and signaling	17	0.117209	C	2	chromosome	14504	B	24
pBC	pPN_Library	under300	Gene regulation and genome replication	Cycle regulator	Cycle regulator	7	HBA75_19290	ftsZ	cell division protein FtsZ	D	Cellular processes and signaling	61	0.0433661	C	2	chromosome	140663	B	24
pBN	pPN_Library	over300	Gene regulation and genome replication	Cycle regulator	Cycle regulator	7	HBA75_19290	ftsZ	cell division protein FtsZ	D	Cellular processes and signaling	59	0.401142	B	2	chromosome	14708	B	24
pBN	pPN_Library	under300	Gene regulation and genome replication	Cycle regulator	Cycle regulator	7	HBA75_19290	ftsZ	cell division protein FtsZ	D	Cellular processes and signaling	3	0.0135863	C	2	chromosome	22081	B	24
pBC	pPC_Library	over300	Gene regulation and genome replication	Cycle regulator	Cycle regulator	7	HBA75_19295	ftsA	cell division protein FtsA	D	Cellular processes and signaling	2669	24.1189	A	3	chromosome	11066	A	31
pBC	pPC_Library	under300	Gene regulation and genome replication	Cycle regulator	Cycle regulator	7	HBA75_19295	ftsA	cell division protein FtsA	D	Cellular processes and signaling	8	0.0571551	C	3	chromosome	13997	A	31
pBN	pPC_Library	over300	Gene regulation and genome replication	Cycle regulator	Cycle regulator	7	HBA75_19295	ftsA	cell division protein FtsA	D	Cellular processes and signaling	4	0.0363273	C	3	chromosome	11011	C	31
pBC	pPN_Library	under300	Gene regulation and genome replication	Cycle regulator	Cycle regulator	7	HBA75_19295	ftsA	cell division protein FtsA	D	Cellular processes and signaling	3	0.00213276	C	3	chromosome	140663	B	31
pBC	pPN_Library	under300	Gene regulation and genome replication	Cycle regulator	Cycle regulator	7	HBA75_20390	bioB	biotin synthase	H	Metabolism	1	0.000710919	C	2	chromosome	140663	C
pBC	pPN_Library	over300	Gene regulation and genome replication	Cycle regulator	Cycle regulator	7	HBA75_20835	yqhT	Xaa-Pro dipeptidase	E	Metabolism	317	2.1856	B	2	chromosome	14504	B	18
pBC	pPN_Library	under300	Gene regulation and genome replication	Cycle regulator	Cycle regulator	7	HBA75_20835	yqhT	Xaa-Pro dipeptidase	E	Metabolism	2521	1.79223	B	2	chromosome	140663	B	18
pBN	pPN_Library	over300	Gene regulation and genome replication	Cycle regulator	Cycle regulator	7	HBA75_20835	yqhT	Xaa-Pro dipeptidase	E	Metabolism	1	0.00679902	C	2	chromosome	14708	NO	18
pBC	pPC_Library	under300	Gene regulation and genome replication	Cycle regulator	Cycle regulator	7	HBA75_21990	safA	spore coat assembly protein ExsA	M	Cellular processes and signaling	1	0.00714439	C	1	chromosome	13997	NO
pBC	pPC_Library	over300	Gene regulation and genome replication	Cycle regulator	Cycle regulator	7	HBA75_22945	ysdC	M42 family metallopeptidase	G	Metabolism	1042	9.41623	B	3	chromosome	11066	A	34
pBC	pPC_Library	under300	Gene regulation and genome replication	Cycle regulator	Cycle regulator	7	HBA75_22945	ysdC	M42 family metallopeptidase	G	Metabolism	20	0.142888	C	3	chromosome	13997	A	34
pBN	pPC_Library	over300	Gene regulation and genome replication	Cycle regulator	Cycle regulator	7	HBA75_22945	ysdC	M42 family metallopeptidase	G	Metabolism	215	1.95259	B	3	chromosome	11011	A	34
pBC	pPN_Library	over300	Gene regulation and genome replication	Cycle regulator	Cycle regulator	7	HBA75_22945	ysdC	M42 family metallopeptidase	G	Metabolism	4449	30.6743	A	3	chromosome	14504	A	34
pBC	pPN_Library	under300	Gene regulation and genome replication	Cycle regulator	Cycle regulator	7	HBA75_22945	ysdC	M42 family metallopeptidase	G	Metabolism	3053	2.17044	B	3	chromosome	140663	A	34
pBN	pPN_Library	over300	Gene regulation and genome replication	Cycle regulator	Cycle regulator	7	HBA75_22945	ysdC	M42 family metallopeptidase	G	Metabolism	3	0.0203971	C	3	chromosome	14708	B	34
pBN	pPN_Library	under300	Gene regulation and genome replication	Cycle regulator	Cycle regulator	7	HBA75_22945	ysdC	M42 family metallopeptidase	G	Metabolism	1	0.00452878	C	3	chromosome	22081	B	34
pBC	pPC_Library	over300	Gene regulation and genome replication	Cycle regulator	Cycle regulator	7	HBA75_23085	pyk	pyruvate kinase	G	Metabolism	47	0.424724	B	3	chromosome	11066	B	26
pBC	pPC_Library	under300	Gene regulation and genome replication	Cycle regulator	Cycle regulator	7	HBA75_23085	pyk	pyruvate kinase	G	Metabolism	1	0.00714439	C	3	chromosome	13997	B	26
pBN	pPC_Library	over300	Gene regulation and genome replication	Cycle regulator	Cycle regulator	7	HBA75_23085	pyk	pyruvate kinase	G	Metabolism	2	0.0181637	C	3	chromosome	11011	C	26
pBC	pPN_Library	over300	Gene regulation and genome replication	Cycle regulator	Cycle regulator	7	HBA75_23380	rpsD	30S ribosomal protein S4	J	Information storage and processing	2	0.0137893	C	2	chromosome	14504	NO
pBC	pPN_Library	under300	Gene regulation and genome replication	Cycle regulator	Cycle regulator	7	HBA75_23380	rpsD	30S ribosomal protein S4	J	Information storage and processing	12	0.00853103	C	2	chromosome	140663	NO
pBC	pPC_Library	over300	Gene regulation and genome replication	Cycle regulator	Cycle regulator	7	HBA75_23625	pepV	dipeptidase PepV	E	Metabolism	570	5.15091	B	2	chromosome	11066	B	29
pBC	pPC_Library	under300	Gene regulation and genome replication	Cycle regulator	Cycle regulator	7	HBA75_23625	pepV	dipeptidase PepV	E	Metabolism	40	0.285776	B	2	chromosome	13997	B	29
pBN	pPC_Library	over300	Gene regulation and genome replication	Cycle regulator	Cycle regulator	7	HBA75_23625	pepV	dipeptidase PepV	E	Metabolism	1	0.00908183	C	2	chromosome	11011	C	29
pBC	pPN_Library	over300	Gene regulation and genome replication	Cycle regulator	Cycle regulator	7	HBA75_23625	pepV	dipeptidase PepV	E	Metabolism	20	0.137893	C	2	chromosome	14504	B	29
pBC	pPN_Library	under300	Gene regulation and genome replication	Cycle regulator	Cycle regulator	7	HBA75_23625	pepV	dipeptidase PepV	E	Metabolism	80	0.0568735	C	2	chromosome	140663	B	29
pBC	pPN_Library	under300	Gene regulation and genome replication	Cycle regulator	Cycle regulator	7	HBA75_23645	ytfP	NAD(P)/FAD-dependent oxidoreductase	S	Poorly characterized	16	0.0113747	C	2	chromosome	140663	C
pBN	pPN_Library	under300	Gene regulation and genome replication	Cycle regulator	Cycle regulator	7	HBA75_31050	recA	recombinase RecA	L	Information storage and processing	3	0.0135863	C	2	pLUSID3	22081	B	4
pBC	pPN_Library	over300	Gene regulation and genome replication	Cycle regulator	Cycle regulator	7	HBA75_30425	ahpF	alkyl hydroperoxide reductase subunit F	O	Cellular processes and signaling	333	2.29592	B	3	pLUSID2	14504	B	20
pBC	pPN_Library	under300	Gene regulation and genome replication	Cycle regulator	Cycle regulator	7	HBA75_30425	ahpF	alkyl hydroperoxide reductase subunit F	O	Cellular processes and signaling	674	0.479159	B	3	pLUSID2	140663	B	20
pBC	pPC_Library	over300	Gene regulation and genome replication	Cycle regulator	Cycle regulator	7	HBA75_30450		dipeptide epimerase	M	Cellular processes and signaling	1865	16.8534	A	3	pLUSID2	11066	A	31
pBC	pPC_Library	under300	Gene regulation and genome replication	Cycle regulator	Cycle regulator	7	HBA75_30450		dipeptide epimerase	M	Cellular processes and signaling	74	0.528685	B	3	pLUSID2	13997	A	31
pBN	pPC_Library	over300	Gene regulation and genome replication	Cycle regulator	Cycle regulator	7	HBA75_30450		dipeptide epimerase	M	Cellular processes and signaling	6182	56.1439	A	3	pLUSID2	11011	A	31
pBC	pPN_Library	over300	Gene regulation and genome replication	Cycle regulator	Cycle regulator	7	HBA75_30450		dipeptide epimerase	M	Cellular processes and signaling	1	0.00689465	C	3	pLUSID2	14504	B	31
pBC	pPN_Library	under300	Gene regulation and genome replication	Cycle regulator	Cycle regulator	7	HBA75_30450		dipeptide epimerase	M	Cellular processes and signaling	4	0.00284368	C	3	pLUSID2	140663	B	31
pBC	pPC_Library	under300	Gene regulation and genome replication	Cycle regulator	Cycle regulator	7	HBA75_30635		IS110 family transposase	L	Information storage and processing	1	0.00714439	C	4	pLUSID2	13997	NO	9
pBC	pPC_Library	over300	Gene regulation and genome replication	Cycle regulator	Cycle regulator	7	HBA75_30720		IS4 family transposase	L	Information storage and processing	691	6.24435	B	3	pLUSID2	11066	B	29
pBC	pPC_Library	under300	Gene regulation and genome replication	Cycle regulator	Cycle regulator	7	HBA75_30720		IS4 family transposase	L	Information storage and processing	23	0.164321	C	3	pLUSID2	13997	B	29
pBN	pPC_Library	over300	Gene regulation and genome replication	Cycle regulator	Cycle regulator	7	HBA75_30720		IS4 family transposase	L	Information storage and processing	48	0.435928	B	3	pLUSID2	11011	B	29
pBC	pPN_Library	over300	Gene regulation and genome replication	Cycle regulator	Cycle regulator	7	HBA75_30720		IS4 family transposase	L	Information storage and processing	56	0.3861	B	3	pLUSID2	14504	B	29
pBC	pPN_Library	under300	Gene regulation and genome replication	Cycle regulator	Cycle regulator	7	HBA75_30720		IS4 family transposase	L	Information storage and processing	4754	3.37971	B	3	pLUSID2	140663	B	29
pBN	pPC_Library	over300	Gene regulation and genome replication	Unknown	Unknown	8	HBA75_00375	prs	ribose-phosphate diphosphokinase	F	Metabolism	3	0.0274725	C	2	chromosome	10920	NO
pBN	pPN_Library	under300	Gene regulation and genome replication	Unknown	Unknown	8	HBA75_00740	rpsG	30S ribosomal protein S7	J	Information storage and processing	3	0.0166297	C	2	chromosome	18040	NO
pBN	pPC_Library	over300	Gene regulation and genome replication	Unknown	Unknown	8	HBA75_00745	fusA	elongation factor G	J	Information storage and processing	251	2.29853	B	2	chromosome	10920	NO	10
pBC	pPN_Library	under300	Gene regulation and genome replication	Unknown	Unknown	8	HBA75_00745	fusA	elongation factor G	J	Information storage and processing	1	0.00304627	C	4	chromosome	32827	C	10
pBN	pPN_Library	over300	Gene regulation and genome replication	Unknown	Unknown	8	HBA75_00745	fusA	elongation factor G	J	Information storage and processing	2	0.020404	C	4	chromosome	9802	NO	10
pBN	pPN_Library	under300	Gene regulation and genome replication	Unknown	Unknown	8	HBA75_00745	fusA	elongation factor G	J	Information storage and processing	2	0.0110865	C	4	chromosome	18040	NO	10
pBC	pPC_Library	over300	Gene regulation and genome replication	Unknown	Unknown	8	HBA75_01455	alr	alanine racemase	E	Metabolism	834	7.90371	B	2	chromosome	10552	B	30
pBC	pPC_Library	under300	Gene regulation and genome replication	Unknown	Unknown	8	HBA75_01455	alr	alanine racemase	E	Metabolism	41683	50.7475	A	2	chromosome	82138	B	30
pBN	pPC_Library	over300	Gene regulation and genome replication	Unknown	Unknown	8	HBA75_01455	alr	alanine racemase	E	Metabolism	4	0.03663	C	2	chromosome	10920	B	30
pBN	pPN_Library	over300	Gene regulation and genome replication	Unknown	Unknown	8	HBA75_01890	purH	bifunctional phosphoribosylaminoimidazolecarboxamide formyltransferase/IMP cyclohydrolase	F	Metabolism	1	0.010202	C	2	chromosome	9802	NO
pBN	pPN_Library	under300	Gene regulation and genome replication	Unknown	Unknown	8	HBA75_01890	purH	bifunctional phosphoribosylaminoimidazolecarboxamide formyltransferase/IMP cyclohydrolase	F	Metabolism	1	0.00554324	C	2	chromosome	18040	NO
pBN	pPC_Library	over300	Gene regulation and genome replication	Unknown	Unknown	8	HBA75_02890	aspA	aspartate ammonia-lyase	E	Metabolism	35	0.320513	B	3	chromosome	10920	C	10
pBN	pPN_Library	over300	Gene regulation and genome replication	Unknown	Unknown	8	HBA75_02890	aspA	aspartate ammonia-lyase	E	Metabolism	10	0.10202	C	3	chromosome	9802	NO	10
pBN	pPN_Library	under300	Gene regulation and genome replication	Unknown	Unknown	8	HBA75_02890	aspA	aspartate ammonia-lyase	E	Metabolism	6	0.0332594	C	3	chromosome	18040	NO	10
pBC	pPC_Library	over300	Gene regulation and genome replication	Unknown	Unknown	8	HBA75_03595	nrtA	ABC transporter substrate-binding protein	P	Metabolism	89	0.843442	B	3	chromosome	10552	A	31
pBC	pPC_Library	under300	Gene regulation and genome replication	Unknown	Unknown	8	HBA75_03595	nrtA	ABC transporter substrate-binding protein	P	Metabolism	261	0.317758	B	3	chromosome	82138	A	31
pBN	pPC_Library	over300	Gene regulation and genome replication	Unknown	Unknown	8	HBA75_03595	nrtA	ABC transporter substrate-binding protein	P	Metabolism	217	1.98718	B	3	chromosome	10920	A	31
pBN	pPN_Library	over300	Gene regulation and genome replication	Unknown	Unknown	8	HBA75_03595	nrtA	ABC transporter substrate-binding protein	P	Metabolism	2	0.020404	C	2	chromosome	9802	NO	31
pBC	pPN_Library	over300	Gene regulation and genome replication	Unknown	Unknown	8	HBA75_03615	thiG	thiazole synthase	H	Metabolism	4662	60.0077	A	2	chromosome	7769	A	25
pBC	pPN_Library	under300	Gene regulation and genome replication	Unknown	Unknown	8	HBA75_03615	thiG	thiazole synthase	H	Metabolism	82	0.249794	C	2	chromosome	32827	A	25
pBN	pPN_Library	over300	Gene regulation and genome replication	Unknown	Unknown	8	HBA75_03615	thiG	thiazole synthase	H	Metabolism	1295	13.2116	A	2	chromosome	9802	A	25
pBN	pPN_Library	under300	Gene regulation and genome replication	Unknown	Unknown	8	HBA75_03615	thiG	thiazole synthase	H	Metabolism	17	0.094235	C	2	chromosome	18040	A	25
pBC	pPC_Library	over300	Gene regulation and genome replication	Unknown	Unknown	8	HBA75_25140	dapF	diaminopimelate epimerase	E	Metabolism	1	0.00947688	C	1	chromosome	10552	C	1
pBC	pPC_Library	under300	Gene regulation and genome replication	Unknown	Unknown	8	HBA75_25140	dapF	diaminopimelate epimerase	E	Metabolism	2	0.00243493	C	1	chromosome	82138	C	1
pBC	pPC_Library	under300	Gene regulation and genome replication	Unknown	Unknown	8	HBA75_26415		phage tail protein	S	Poorly characterized	5	0.00608732	C	1	chromosome	82138	NO	2
pBN	pPC_Library	over300	Gene regulation and genome replication	Unknown	Unknown	8	HBA75_01870	purL	phosphoribosylformylglycinamidine synthase II	F	Metabolism	9	0.0824176	C	2	chromosome	10920	NO	5
pBN	pPC_Library	over300	Gene regulation and genome replication	Unknown	Unknown	8	HBA75_08385	phnT	ABC transporter ATP-binding protein	P	Metabolism	12	0.10989	C	2	chromosome	10920	NO	6
pBN	pPC_Library	over300	Gene regulation and genome replication	Unknown	Unknown	8	HBA75_11115	atoD	acetate CoA-transferase subunit alpha	I	Metabolism	7	0.0641026	C	2	chromosome	10920	NO	1
pBN	pPC_Library	over300	Gene regulation and genome replication	Unknown	Unknown	8	HBA75_18010	hutI	imidazolonepropionase	Q	Metabolism	1	0.00915751	C	2	chromosome	10920	NO	3
pBN	pPC_Library	over300	Gene regulation and genome replication	Unknown	Unknown	8	HBA75_22900	pheS	phenylalanine--tRNA ligase subunit alpha	J	Information storage and processing	6	0.0549451	C	1	chromosome	10920	NO	2
pBN	pPC_Library	over300	Gene regulation and genome replication	Unknown	Unknown	8	HBA75_23425	acuC	acetoin utilization protein AcuC	B	Information storage and processing	2	0.018315	C	3	chromosome	10920	NO	1
pBN	pPC_Library	over300	Gene regulation and genome replication	Unknown	Unknown	8	HBA75_25540	fadM	proline dehydrogenase	E	Metabolism	23	0.210623	C	2	chromosome	10920	NO	1
pBN	pPC_Library	over300	Gene regulation and genome replication	Unknown	Unknown	8	HBA75_30675	fumB	class I fumarate hydratase	C	Metabolism	3	0.0274725	C	2	pLUSID2	10920	NO	4
pBN	pPC_Library	over300	Gene regulation and genome replication	Unknown	Unknown	8	HBA75_23575	pepA	M42 family metallopeptidase	G	Metabolism	2	0.018315	C	1	chromosome	10920	NO	3
pBC	pPN_Library	over300	Gene regulation and genome replication	Unknown	Unknown	8	HBA75_19390	ylbL	PDZ domain-containing protein	T	Cellular processes and signaling	11	0.141588	C	1	chromosome	7769	C	1
pBC	pPN_Library	under300	Gene regulation and genome replication	Unknown	Unknown	8	HBA75_19390	ylbL	PDZ domain-containing protein	T	Cellular processes and signaling	2	0.00609255	C	1	chromosome	32827	C	1
pBC	pPN_Library	under300	Gene regulation and genome replication	Unknown	Unknown	8	HBA75_25320	glpX	class II fructose-bisphosphatase	G	Metabolism	1	0.00304627	C	2	chromosome	32827	B	1
pBC	pPN_Library	over300	Gene regulation and genome replication	Unknown	Unknown	8	HBA75_30985		phage tail tape measure protein	D	Cellular processes and signaling	1	0.0128717	C	2	pLUSID3	7769	NO	5
pBC	pPC_Library	over300	Gene regulation and genome replication	Unknown	Unknown	8	HBA75_03795		DUF3238 domain-containing protein	S	Poorly characterized	100	0.947688	B	1	chromosome	10552	C	12
pBC	pPC_Library	under300	Gene regulation and genome replication	Unknown	Unknown	8	HBA75_03795		DUF3238 domain-containing protein	S	Poorly characterized	117	0.142443	C	1	chromosome	82138	C	12
pBN	pPN_Library	over300	Gene regulation and genome replication	Unknown	Unknown	8	HBA75_03795		DUF3238 domain-containing protein	S	Poorly characterized	2	0.020404	C	2	chromosome	9802	C	12
pBN	pPN_Library	under300	Gene regulation and genome replication	Unknown	Unknown	8	HBA75_03795		DUF3238 domain-containing protein	S	Poorly characterized	4	0.0221729	C	2	chromosome	18040	C	12
pBN	pPN_Library	over300	Gene regulation and genome replication	Unknown	Unknown	8	HBA75_04360	amiD2	amidase	M	Cellular processes and signaling	4	0.040808	C	2	chromosome	9802	NO	1
pBN	pPN_Library	under300	Gene regulation and genome replication	Unknown	Unknown	8	HBA75_04360	amiD2	amidase	M	Cellular processes and signaling	3	0.0166297	C	2	chromosome	18040	NO	1
pBN	pPN_Library	over300	Gene regulation and genome replication	Unknown	Unknown	8	HBA75_11115	atoD	acetate CoA-transferase subunit alpha	I	Metabolism	7	0.071414	C	2	chromosome	9802	NO	1
pBN	pPN_Library	under300	Gene regulation and genome replication	Unknown	Unknown	8	HBA75_11115	atoD	acetate CoA-transferase subunit alpha	I	Metabolism	5	0.0277162	C	2	chromosome	18040	NO	1
pBN	pPN_Library	over300	Gene regulation and genome replication	Unknown	Unknown	8	HBA75_12045	pepD	beta-Ala-His dipeptidase	E	Metabolism	19	0.193838	C	2	chromosome	9802	NO	4
pBN	pPN_Library	under300	Gene regulation and genome replication	Unknown	Unknown	8	HBA75_12045	pepD	beta-Ala-His dipeptidase	E	Metabolism	7	0.0388027	C	2	chromosome	18040	NO	4
pBN	pPN_Library	over300	Gene regulation and genome replication	Unknown	Unknown	8	HBA75_18215	lexA	transcriptional repressor LexA	K	Information storage and processing	99	1.01	B	1	chromosome	9802	NO	2
pBN	pPN_Library	under300	Gene regulation and genome replication	Unknown	Unknown	8	HBA75_18215	lexA	transcriptional repressor LexA	K	Information storage and processing	11	0.0609756	C	1	chromosome	18040	NO	2
pBN	pPN_Library	over300	Gene regulation and genome replication	Unknown	Unknown	8	HBA75_19390	ylbL	PDZ domain-containing protein	T	Cellular processes and signaling	2	0.020404	C	1	chromosome	9802	B	1
pBN	pPN_Library	under300	Gene regulation and genome replication	Unknown	Unknown	8	HBA75_19390	ylbL	PDZ domain-containing protein	T	Cellular processes and signaling	1	0.00554324	C	1	chromosome	18040	B	1
pBN	pPN_Library	under300	Gene regulation and genome replication	Unknown	Unknown	8	HBA75_21235	yqgB	DUF1189 domain-containing protein	S	Poorly characterized	1	0.00554324	C	2	chromosome	18040	NO	1
pBN	pPN_Library	over300	Gene regulation and genome replication	Unknown	Unknown	8	HBA75_22900	pheS	phenylalanine--tRNA ligase subunit alpha	J	Information storage and processing	4	0.040808	C	1	chromosome	9802	NO	2
pBN	pPN_Library	over300	Gene regulation and genome replication	Unknown	Unknown	8	HBA75_23510	ampS	aminopeptidase	E	Metabolism	5	0.05101	C	2	chromosome	9802	NO	4
pBN	pPN_Library	over300	Gene regulation and genome replication	Unknown	Unknown	8	HBA75_25320	glpX	class II fructose-bisphosphatase	G	Metabolism	7	0.071414	C	2	chromosome	9802	NO	1
pBN	pPN_Library	under300	Gene regulation and genome replication	Unknown	Unknown	8	HBA75_25320	glpX	class II fructose-bisphosphatase	G	Metabolism	3	0.0166297	C	2	chromosome	18040	NO	1
pBN	pPN_Library	over300	Gene regulation and genome replication	Unknown	Unknown	8	HBA75_25845	yjlC	DUF1641 domain-containing protein	S	Poorly characterized	2	0.020404	C	3	chromosome	9802	NO	2
pBN	pPN_Library	under300	Gene regulation and genome replication	Unknown	Unknown	8	HBA75_25845	yjlC	DUF1641 domain-containing protein	S	Poorly characterized	5	0.0277162	C	3	chromosome	18040	NO	2
pBN	pPN_Library	over300	Gene regulation and genome replication	Unknown	Unknown	8	HBA75_26390	virB5	peptidase S74	U	Cellular processes and signaling	1	0.010202	C	3	chromosome	9802	NO	1
pBN	pPN_Library	over300	Gene regulation and genome replication	Unknown	Unknown	8	HBA75_26395		phage tail family protein	S	Poorly characterized	3	0.030606	C	2	chromosome	9802	NO	2
pBN	pPN_Library	over300	Gene regulation and genome replication	Unknown	Unknown	8	HBA75_27025	licH	6-phospho-beta-glucosidase	G	Metabolism	1	0.010202	C	2	chromosome	9802	NO	3
pBN	pPN_Library	under300	Gene regulation and genome replication	Unknown	Unknown	8	HBA75_27025	licH	6-phospho-beta-glucosidase	G	Metabolism	2	0.0110865	C	2	chromosome	18040	NO	3
pBN	pPN_Library	over300	Gene regulation and genome replication	Unknown	Unknown	8	HBA75_27930	GDPD	glycerophosphodiester phosphodiesterase	C	Metabolism	10	0.10202	C	2	chromosome	9802	NO	6
pBN	pPN_Library	under300	Gene regulation and genome replication	Unknown	Unknown	8	HBA75_27930	GDPD	glycerophosphodiester phosphodiesterase	C	Metabolism	8	0.0443459	C	2	chromosome	18040	NO	6
pBN	pPC_Library	over300	Gene regulation and genome replication	Unknown	Unknown	8	HBA75_03905		DUF871 domain-containing protein	S	Poorly characterized	1	0.00915751	C	2	chromosome	10920	NO
pBN	pPC_Library	over300	Gene regulation and genome replication	Unknown	Unknown	8	HBA75_04365		methyltransferase	L	Information storage and processing	137	1.25458	B	3	chromosome	10920	NO	11
pBN	pPC_Library	over300	Gene regulation and genome replication	Unknown	Unknown	8	HBA75_04720		alpha/beta fold hydrolase	G	Metabolism	22	0.201465	C	3	chromosome	10920	NO	11
pBN	pPC_Library	over300	Gene regulation and genome replication	Unknown	Unknown	8	HBA75_05095	oxdD	oxalate decarboxylase family bicupin	G	Metabolism	11	0.100733	C	3	chromosome	10920	NO	7
pBN	pPN_Library	over300	Gene regulation and genome replication	Unknown	Unknown	8	HBA75_31050	recA	recombinase RecA	L	Information storage and processing	14	0.142828	C	2	pLUSID3	9802	B	4
pBC	pPC_Library	under300	Gene regulation and genome replication	Unknown	Unknown	8	HBA75_07470	aroC	chorismate synthase	E	Metabolism	1	0.00121746	C		chromosome	82138	NO
pBN	pPN_Library	over300	Gene regulation and genome replication	Unknown	Unknown	8	HBA75_08205	flgE	flagellar hook protein FlgE	N	Cellular processes and signaling	2	0.020404	C	2	chromosome	9802	NO
pBN	pPN_Library	under300	Gene regulation and genome replication	Unknown	Unknown	8	HBA75_08205	flgE	flagellar hook protein FlgE	N	Cellular processes and signaling	1	0.00554324	C	2	chromosome	18040	NO
pBN	pPC_Library	over300	Gene regulation and genome replication	Unknown	Unknown	8	HBA75_08260	fliM	flagellar motor switch protein FliM	N	Cellular processes and signaling	22	0.201465	C	2	chromosome	10920	NO	9
pBN	pPN_Library	over300	Gene regulation and genome replication	Unknown	Unknown	8	HBA75_08740	lysC	aspartate kinase	E	Metabolism	4	0.040808	C	2	chromosome	9802	NO
pBN	pPN_Library	under300	Gene regulation and genome replication	Unknown	Unknown	8	HBA75_08740	lysC	aspartate kinase	E	Metabolism	4	0.0221729	C	2	chromosome	18040	NO
pBN	pPC_Library	over300	Gene regulation and genome replication	Unknown	Unknown	8	HBA75_08815	hflX	GTPase HflX	S	Poorly characterized	1	0.00915751	C	3	chromosome	10920	NO
pBN	pPC_Library	over300	Gene regulation and genome replication	Unknown	Unknown	8	HBA75_11030	azr	NAD(P)H-dependent oxidoreductase	S	Poorly characterized	1	0.00915751	C	2	chromosome	10920	NO
pBN	pPC_Library	over300	Gene regulation and genome replication	Unknown	Unknown	8	HBA75_11325	prpD	2-methylcitrate dehydratase	S	Poorly characterized	22	0.201465	C	2	chromosome	10920	NO	8
pBC	pPN_Library	under300	Gene regulation and genome replication	Unknown	Unknown	8	HBA75_11325	prpD	2-methylcitrate dehydratase	S	Poorly characterized	1	0.00304627	C	2	chromosome	32827	C	8
pBN	pPN_Library	over300	Gene regulation and genome replication	Unknown	Unknown	8	HBA75_11325	prpD	2-methylcitrate dehydratase	S	Poorly characterized	8	0.081616	C	2	chromosome	9802	NO	8
pBN	pPC_Library	over300	Gene regulation and genome replication	Unknown	Unknown	8	HBA75_12125		non-ribosomal peptide synthetase	Q	Metabolism	19	0.173993	C	3	chromosome	10920	NO	8
pBN	pPC_Library	over300	Gene regulation and genome replication	Unknown	Unknown	8	HBA75_12130		amino acid adenylation domain-containing protein	Q	Metabolism	19	0.173993	C	3	chromosome	10920	NO	8
pBN	pPC_Library	over300	Gene regulation and genome replication	Unknown	Unknown	8	HBA75_14045		aldo/keto reductase	C	Metabolism	1	0.00915751	C	2	chromosome	10920	NO
pBC	pPC_Library	over300	Gene regulation and genome replication	Unknown	Unknown	8	HBA75_14510	aroC	chorismate synthase	E	Metabolism	1	0.00947688	C	1	chromosome	10552	C
pBC	pPC_Library	over300	Gene regulation and genome replication	Unknown	Unknown	8	HBA75_14680	proB	glutamate 5-kinase	E	Metabolism	27	0.255876	B	1	chromosome	10552	C	15
pBC	pPC_Library	under300	Gene regulation and genome replication	Unknown	Unknown	8	HBA75_14680	proB	glutamate 5-kinase	E	Metabolism	27	0.0328715	C	1	chromosome	82138	C	15
pBN	pPC_Library	over300	Gene regulation and genome replication	Unknown	Unknown	8	HBA75_14680	proB	glutamate 5-kinase	E	Metabolism	1	0.00915751	C	1	chromosome	10920	B	15
pBN	pPC_Library	over300	Gene regulation and genome replication	Unknown	Unknown	8	HBA75_15340	pps	phosphoenolpyruvate synthase	G	Metabolism	2	0.018315	C	3	chromosome	10920	NO
pBN	pPC_Library	over300	Gene regulation and genome replication	Unknown	Unknown	8	HBA75_15655		beta-lactamase family protein	V	Cellular processes and signaling	4	0.03663	C	2	chromosome	10920	NO	8
pBN	pPC_Library	over300	Gene regulation and genome replication	Unknown	Unknown	8	HBA75_16405	rfbG	CDP-glucose 4.6-dehydratase	G	Metabolism	60	0.549451	B	3	chromosome	10920	NO	12
pBC	pPC_Library	over300	Gene regulation and genome replication	Unknown	Unknown	8	HBA75_18825	infB	translation initiation factor IF-2	J	Information storage and processing	1409	13.3529	A	2	chromosome	10552	B	24
pBC	pPC_Library	under300	Gene regulation and genome replication	Unknown	Unknown	8	HBA75_18825	infB	translation initiation factor IF-2	J	Information storage and processing	501	0.609949	B	2	chromosome	82138	B	24
pBN	pPC_Library	over300	Gene regulation and genome replication	Unknown	Unknown	8	HBA75_18825	infB	translation initiation factor IF-2	J	Information storage and processing	3	0.0274725	C	2	chromosome	10920	C	24
pBC	pPN_Library	over300	Gene regulation and genome replication	Unknown	Unknown	8	HBA75_18825	infB	translation initiation factor IF-2	J	Information storage and processing	2	0.0257433	C	2	chromosome	7769	B	24
pBC	pPN_Library	under300	Gene regulation and genome replication	Unknown	Unknown	8	HBA75_18825	infB	translation initiation factor IF-2	J	Information storage and processing	2	0.00609255	C	2	chromosome	32827	B	24
pBN	pPN_Library	over300	Gene regulation and genome replication	Unknown	Unknown	8	HBA75_18825	infB	translation initiation factor IF-2	J	Information storage and processing	58	0.591716	B	2	chromosome	9802	NO	24
pBN	pPN_Library	under300	Gene regulation and genome replication	Unknown	Unknown	8	HBA75_18825	infB	translation initiation factor IF-2	J	Information storage and processing	13	0.0720621	C	2	chromosome	18040	NO	24
pBN	pPC_Library	over300	Gene regulation and genome replication	Unknown	Unknown	8	HBA75_18965	trmD	tRNA (guanosine(37)-N1)-methyltransferase TrmD	J	Information storage and processing	16	0.14652	C	3	chromosome	10920	NO	10
pBN	pPC_Library	over300	Gene regulation and genome replication	Unknown	Unknown	8	HBA75_19085	rlmN	23S rRNA (adenine(2503)-C(2))-methyltransferase RlmN	J	Information storage and processing	16	0.14652	C	2	chromosome	10920	NO
pBN	pPN_Library	over300	Gene regulation and genome replication	Unknown	Unknown	8	HBA75_19180	pyrD	dihydroorotate oxidase B catalytic subunit	F	Metabolism	2	0.020404	C	2	chromosome	9802	NO
pBC	pPN_Library	over300	Gene regulation and genome replication	Unknown	Unknown	8	HBA75_19290	ftsZ	cell division protein FtsZ	D	Cellular processes and signaling	1102	14.1846	A	2	chromosome	7769	B	24
pBC	pPN_Library	under300	Gene regulation and genome replication	Unknown	Unknown	8	HBA75_19290	ftsZ	cell division protein FtsZ	D	Cellular processes and signaling	415	1.2642	B	2	chromosome	32827	B	24
pBN	pPN_Library	over300	Gene regulation and genome replication	Unknown	Unknown	8	HBA75_19290	ftsZ	cell division protein FtsZ	D	Cellular processes and signaling	75	0.76515	B	2	chromosome	9802	B	24
pBN	pPN_Library	under300	Gene regulation and genome replication	Unknown	Unknown	8	HBA75_19290	ftsZ	cell division protein FtsZ	D	Cellular processes and signaling	9	0.0498891	C	2	chromosome	18040	B	24
pBC	pPC_Library	over300	Gene regulation and genome replication	Unknown	Unknown	8	HBA75_19295	ftsA	cell division protein FtsA	D	Cellular processes and signaling	56	0.530705	B	3	chromosome	10552	A	31
pBC	pPC_Library	under300	Gene regulation and genome replication	Unknown	Unknown	8	HBA75_19295	ftsA	cell division protein FtsA	D	Cellular processes and signaling	5	0.00608732	C	3	chromosome	82138	A	31
pBN	pPC_Library	over300	Gene regulation and genome replication	Unknown	Unknown	8	HBA75_19295	ftsA	cell division protein FtsA	D	Cellular processes and signaling	2388	21.8681	A	3	chromosome	10920	C	31
pBC	pPN_Library	over300	Gene regulation and genome replication	Unknown	Unknown	8	HBA75_19295	ftsA	cell division protein FtsA	D	Cellular processes and signaling	4	0.0514867	C	3	chromosome	7769	B	31
pBC	pPN_Library	under300	Gene regulation and genome replication	Unknown	Unknown	8	HBA75_19295	ftsA	cell division protein FtsA	D	Cellular processes and signaling	1	0.00304627	C	3	chromosome	32827	B	31
pBN	pPN_Library	over300	Gene regulation and genome replication	Unknown	Unknown	8	HBA75_19295	ftsA	cell division protein FtsA	D	Cellular processes and signaling	175	1.78535	B	3	chromosome	9802	NO	31
pBN	pPN_Library	under300	Gene regulation and genome replication	Unknown	Unknown	8	HBA75_19295	ftsA	cell division protein FtsA	D	Cellular processes and signaling	4	0.0221729	C	3	chromosome	18040	NO	31
pBN	pPN_Library	over300	Gene regulation and genome replication	Unknown	Unknown	8	HBA75_20390	bioB	biotin synthase	H	Metabolism	3	0.030606	C	2	chromosome	9802	NO
pBN	pPN_Library	under300	Gene regulation and genome replication	Unknown	Unknown	8	HBA75_20760	accC	acetyl-CoA carboxylase biotin carboxylase subunit	I	Metabolism	1	0.00554324	C	1	chromosome	18040	NO
pBN	pPN_Library	over300	Gene regulation and genome replication	Unknown	Unknown	8	HBA75_20835	yqhT	Xaa-Pro dipeptidase	E	Metabolism	65	0.66313	B	2	chromosome	9802	NO	18
pBN	pPN_Library	under300	Gene regulation and genome replication	Unknown	Unknown	8	HBA75_20835	yqhT	Xaa-Pro dipeptidase	E	Metabolism	34	0.18847	C	2	chromosome	18040	NO	18
pBN	pPC_Library	over300	Gene regulation and genome replication	Unknown	Unknown	8	HBA75_21125	metB	cystathionine gamma-synthase/O-acetylhomoserine thiolyase	E	Metabolism	15	0.137363	C	2	chromosome	10920	NO	8
pBC	pPC_Library	over300	Gene regulation and genome replication	Unknown	Unknown	8	HBA75_22945	ysdC	M42 family metallopeptidase	G	Metabolism	3495	33.1217	A	3	chromosome	10552	A	34
pBC	pPC_Library	under300	Gene regulation and genome replication	Unknown	Unknown	8	HBA75_22945	ysdC	M42 family metallopeptidase	G	Metabolism	164	0.199664	C	3	chromosome	82138	A	34
pBN	pPC_Library	over300	Gene regulation and genome replication	Unknown	Unknown	8	HBA75_22945	ysdC	M42 family metallopeptidase	G	Metabolism	2766	25.3297	A	3	chromosome	10920	A	34
pBC	pPN_Library	over300	Gene regulation and genome replication	Unknown	Unknown	8	HBA75_22945	ysdC	M42 family metallopeptidase	G	Metabolism	3	0.038615	C	3	chromosome	7769	A	34
pBC	pPN_Library	under300	Gene regulation and genome replication	Unknown	Unknown	8	HBA75_22945	ysdC	M42 family metallopeptidase	G	Metabolism	41	0.124897	C	3	chromosome	32827	A	34
pBN	pPN_Library	over300	Gene regulation and genome replication	Unknown	Unknown	8	HBA75_22945	ysdC	M42 family metallopeptidase	G	Metabolism	349	3.5605	B	3	chromosome	9802	B	34
pBN	pPN_Library	under300	Gene regulation and genome replication	Unknown	Unknown	8	HBA75_22945	ysdC	M42 family metallopeptidase	G	Metabolism	27	0.149667	C	3	chromosome	18040	B	34
pBN	pPC_Library	over300	Gene regulation and genome replication	Unknown	Unknown	8	HBA75_23085	pyk	pyruvate kinase	G	Metabolism	424	3.88278	B	3	chromosome	10920	C	26
pBN	pPN_Library	over300	Gene regulation and genome replication	Unknown	Unknown	8	HBA75_23085	pyk	pyruvate kinase	G	Metabolism	7	0.071414	C	3	chromosome	9802	NO	26
pBN	pPC_Library	over300	Gene regulation and genome replication	Unknown	Unknown	8	HBA75_23320	acsA	acyl--CoA ligase	I	Metabolism	1	0.00915751	C	3	chromosome	10920	NO
pBC	pPN_Library	under300	Gene regulation and genome replication	Unknown	Unknown	8	HBA75_23340	ezrA	septation ring formation regulator EzrA	D	Cellular processes and signaling	1	0.00304627	C	1	chromosome	32827	C
pBN	pPN_Library	under300	Gene regulation and genome replication	Unknown	Unknown	8	HBA75_23340	ezrA	septation ring formation regulator EzrA	D	Cellular processes and signaling	2	0.0110865	C	1	chromosome	18040	NO
pBC	pPC_Library	over300	Gene regulation and genome replication	Unknown	Unknown	8	HBA75_23625	pepV	dipeptidase PepV	E	Metabolism	27	0.255876	B	2	chromosome	10552	B	29
pBN	pPC_Library	over300	Gene regulation and genome replication	Unknown	Unknown	8	HBA75_23625	pepV	dipeptidase PepV	E	Metabolism	14	0.128205	C	2	chromosome	10920	C	29
pBN	pPN_Library	over300	Gene regulation and genome replication	Unknown	Unknown	8	HBA75_23625	pepV	dipeptidase PepV	E	Metabolism	22	0.224444	C	2	chromosome	9802	NO	29
pBN	pPN_Library	under300	Gene regulation and genome replication	Unknown	Unknown	8	HBA75_23625	pepV	dipeptidase PepV	E	Metabolism	3	0.0166297	C	2	chromosome	18040	NO	29
pBN	pPN_Library	over300	Gene regulation and genome replication	Unknown	Unknown	8	HBA75_24320		alpha/beta hydrolase	S	Poorly characterized	3	0.030606	C	1	chromosome	9802	NO
pBN	pPN_Library	under300	Gene regulation and genome replication	Unknown	Unknown	8	HBA75_24320		alpha/beta hydrolase	S	Poorly characterized	6	0.0332594	C	1	chromosome	18040	NO
pBC	pPC_Library	over300	Gene regulation and genome replication	Unknown	Unknown	8	HBA75_25400	sufB	Fe-S cluster assembly protein SufB	O	Cellular processes and signaling	1	0.00947688	C	3	chromosome	10552	C	16
pBN	pPC_Library	over300	Gene regulation and genome replication	Unknown	Unknown	8	HBA75_25400	sufB	Fe-S cluster assembly protein SufB	O	Cellular processes and signaling	323	2.95788	B	3	chromosome	10920	NO	16
pBN	pPN_Library	over300	Gene regulation and genome replication	Unknown	Unknown	8	HBA75_25400	sufB	Fe-S cluster assembly protein SufB	O	Cellular processes and signaling	2	0.020404	C	3	chromosome	9802	NO	16
pBN	pPC_Library	over300	Gene regulation and genome replication	Unknown	Unknown	8	HBA75_26335	cggR	gapA transcriptional regulator CggR	K	Information storage and processing	64	0.586081	B	2	chromosome	10920	NO	9
pBN	pPN_Library	under300	Gene regulation and genome replication	Unknown	Unknown	8	HBA75_31050	recA	recombinase RecA	L	Information storage and processing	2	0.0110865	C	2	pLUSID3	18040	B	4
pBN	pPN_Library	over300	Gene regulation and genome replication	Unknown	Unknown	8	HBA75_27605	atpA	F0F1 ATP synthase subunit alpha	C	Metabolism	1	0.010202	C	4	chromosome	9802	NO
pBN	pPC_Library	over300	Gene regulation and genome replication	Unknown	Unknown	8	HBA75_28325	guaC	GMP reductase	F	Metabolism	2	0.018315	C		chromosome	10920	NO
pBC	pPN_Library	over300	Gene regulation and genome replication	Unknown	Unknown	8	HBA75_30425	ahpF	alkyl hydroperoxide reductase subunit F	O	Cellular processes and signaling	2	0.0257433	C	3	pLUSID2	7769	B	20
pBC	pPN_Library	under300	Gene regulation and genome replication	Unknown	Unknown	8	HBA75_30425	ahpF	alkyl hydroperoxide reductase subunit F	O	Cellular processes and signaling	4	0.0121851	C	3	pLUSID2	32827	B	20
pBN	pPN_Library	over300	Gene regulation and genome replication	Unknown	Unknown	8	HBA75_30425	ahpF	alkyl hydroperoxide reductase subunit F	O	Cellular processes and signaling	60	0.61212	B	3	pLUSID2	9802	C	20
pBN	pPN_Library	under300	Gene regulation and genome replication	Unknown	Unknown	8	HBA75_30425	ahpF	alkyl hydroperoxide reductase subunit F	O	Cellular processes and signaling	2	0.0110865	C	3	pLUSID2	18040	C	20
pBC	pPC_Library	over300	Gene regulation and genome replication	Unknown	Unknown	8	HBA75_30450		dipeptide epimerase	M	Cellular processes and signaling	672	6.36846	B	3	pLUSID2	10552	A	31
pBC	pPC_Library	under300	Gene regulation and genome replication	Unknown	Unknown	8	HBA75_30450		dipeptide epimerase	M	Cellular processes and signaling	25	0.0304366	C	3	pLUSID2	82138	A	31
pBN	pPC_Library	over300	Gene regulation and genome replication	Unknown	Unknown	8	HBA75_30450		dipeptide epimerase	M	Cellular processes and signaling	3203	29.3315	A	3	pLUSID2	10920	A	31
pBC	pPN_Library	over300	Gene regulation and genome replication	Unknown	Unknown	8	HBA75_30450		dipeptide epimerase	M	Cellular processes and signaling	1	0.0128717	C	3	pLUSID2	7769	B	31
pBN	pPN_Library	over300	Gene regulation and genome replication	Unknown	Unknown	8	HBA75_30450		dipeptide epimerase	M	Cellular processes and signaling	42	0.428484	B	3	pLUSID2	9802	NO	31
pBN	pPN_Library	under300	Gene regulation and genome replication	Unknown	Unknown	8	HBA75_30450		dipeptide epimerase	M	Cellular processes and signaling	14	0.0776053	C	3	pLUSID2	18040	NO	31
pBN	pPC_Library	over300	Gene regulation and genome replication	Unknown	Unknown	8	HBA75_30635		IS110 family transposase	L	Information storage and processing	46	0.421245	B	4	pLUSID2	10920	NO	9
pBN	pPC_Library	over300	Gene regulation and genome replication	Unknown	Unknown	8	HBA75_30685	yfkA	radical SAM/CxCxxxxC motif protein YfkAB	S	Poorly characterized	1	0.00915751	C	3	pLUSID2	10920	NO	7
pBC	pPC_Library	over300	Gene regulation and genome replication	Unknown	Unknown	8	HBA75_30720		IS4 family transposase	L	Information storage and processing	2802	26.5542	A	3	pLUSID2	10552	B	29
pBC	pPC_Library	under300	Gene regulation and genome replication	Unknown	Unknown	8	HBA75_30720		IS4 family transposase	L	Information storage and processing	62	0.0754827	C	3	pLUSID2	82138	B	29
pBN	pPC_Library	over300	Gene regulation and genome replication	Unknown	Unknown	8	HBA75_30720		IS4 family transposase	L	Information storage and processing	80	0.732601	B	3	pLUSID2	10920	B	29
pBC	pPN_Library	under300	Gene regulation and genome replication	Unknown	Unknown	8	HBA75_30720		IS4 family transposase	L	Information storage and processing	2	0.00609255	C	3	pLUSID2	32827	B	29
pBN	pPN_Library	over300	Gene regulation and genome replication	Unknown	Unknown	8	HBA75_30720		IS4 family transposase	L	Information storage and processing	8	0.081616	C	3	pLUSID2	9802	NO	29
pBN	pPN_Library	under300	Gene regulation and genome replication	Unknown	Unknown	8	HBA75_30720		IS4 family transposase	L	Information storage and processing	114	0.631929	B	3	pLUSID2	18040	NO	29
pBN	pPN_Library	over300	Virion structure and DNA packaging	Unknown	Unknown	9	HBA75_00400	yabM	oligosaccharide flippase family protein	S	Poorly characterized	1	0.00889917	C	3	chromosome	11237	NO
pBN	pPN_Library	over300	Virion structure and DNA packaging	Unknown	Unknown	9	HBA75_00725	rpoC	DNA-directed RNA polymerase subunit beta'	K	Information storage and processing	2	0.0177983	C	3	chromosome	11237	NO
pBN	pPC_Library	over300	Virion structure and DNA packaging	Unknown	Unknown	9	HBA75_00745	fusA	elongation factor G	J	Information storage and processing	2	0.0212925	C	2	chromosome	9393	NO	10
pBN	pPN_Library	over300	Virion structure and DNA packaging	Unknown	Unknown	9	HBA75_00745	fusA	elongation factor G	J	Information storage and processing	7	0.0622942	C	4	chromosome	11237	NO	10
pBN	pPN_Library	over300	Virion structure and DNA packaging	Unknown	Unknown	9	HBA75_00865	adk	adenylate kinase	F	Metabolism	1	0.00889917	C	3	chromosome	11237	NO
pBC	pPC_Library	over300	Virion structure and DNA packaging	Unknown	Unknown	9	HBA75_01455	alr	alanine racemase	E	Metabolism	54	0.51458	B	2	chromosome	10494	B	30
pBN	pPC_Library	over300	Virion structure and DNA packaging	Unknown	Unknown	9	HBA75_01850	purB	adenylosuccinate lyase	F	Metabolism	1	0.0106462	C	1	chromosome	9393	NO
pBN	pPN_Library	over300	Virion structure and DNA packaging	Unknown	Unknown	9	HBA75_01995	gatA	Asp-tRNA(Asn)/Glu-tRNA(Gln) amidotransferase subunit GatA	J	Information storage and processing	1	0.00889917	C	2	chromosome	11237	NO
pBN	pPN_Library	over300	Virion structure and DNA packaging	Unknown	Unknown	9	HBA75_02665	ugpE	carbohydrate ABC transporter permease	P	Metabolism	1	0.00889917	C	3	chromosome	11237	NO
pBN	pPN_Library	under300	Virion structure and DNA packaging	Unknown	Unknown	9	HBA75_02665	ugpE	carbohydrate ABC transporter permease	P	Metabolism	2	0.00594831	C	3	chromosome	33623	NO
pBN	pPC_Library	over300	Virion structure and DNA packaging	Unknown	Unknown	9	HBA75_02890	aspA	aspartate ammonia-lyase	E	Metabolism	84	0.894283	B	3	chromosome	9393	C	10
pBN	pPN_Library	over300	Virion structure and DNA packaging	Unknown	Unknown	9	HBA75_02890	aspA	aspartate ammonia-lyase	E	Metabolism	1	0.00889917	C	3	chromosome	11237	NO	10
pBC	pPC_Library	over300	Virion structure and DNA packaging	Unknown	Unknown	9	HBA75_03595	nrtA	ABC transporter substrate-binding protein	P	Metabolism	205	1.9535	B	3	chromosome	10494	A	31
pBN	pPC_Library	over300	Virion structure and DNA packaging	Unknown	Unknown	9	HBA75_03595	nrtA	ABC transporter substrate-binding protein	P	Metabolism	1083	11.5299	A	3	chromosome	9393	A	31
pBC	pPN_Library	over300	Virion structure and DNA packaging	Unknown	Unknown	9	HBA75_03615	thiG	thiazole synthase	H	Metabolism	5425	62.6805	A	2	chromosome	8655	A	25
pBC	pPC_Library	over300	Virion structure and DNA packaging	Unknown	Unknown	9	HBA75_03795		DUF3238 domain-containing protein	S	Poorly characterized	8	0.076234	C	1	chromosome	10494	C	12
pBC	pPC_Library	over300	Virion structure and DNA packaging	Unknown	Unknown	9	HBA75_11115	atoD	acetate CoA-transferase subunit alpha	I	Metabolism	2	0.0190585	C	2	chromosome	10494	C	1
pBC	pPC_Library	over300	Virion structure and DNA packaging	Unknown	Unknown	9	HBA75_22900	pheS	phenylalanine--tRNA ligase subunit alpha	J	Information storage and processing	4	0.038117	C	1	chromosome	10494	NO	2
pBC	pPC_Library	over300	Virion structure and DNA packaging	Unknown	Unknown	9	HBA75_26415		phage tail protein	S	Poorly characterized	1	0.00952925	C	1	chromosome	10494	NO	2
pBC	pPC_Library	over300	Virion structure and DNA packaging	Unknown	Unknown	9	HBA75_30510		phage tail family protein	S	Poorly characterized	8	0.076234	C		pLUSID2	10494	C	6
pBC	pPC_Library	over300	Virion structure and DNA packaging	Unknown	Unknown	9	HBA75_30675	fumB	class I fumarate hydratase	C	Metabolism	1	0.00952925	C	2	pLUSID2	10494	C	4
pBN	pPC_Library	over300	Virion structure and DNA packaging	Unknown	Unknown	9	HBA75_01145	oppD	ABC transporter ATP-binding protein	P	Metabolism	5	0.0532311	C	2	chromosome	9393	NO	2
pBN	pPC_Library	over300	Virion structure and DNA packaging	Unknown	Unknown	9	HBA75_01870	purL	phosphoribosylformylglycinamidine synthase II	F	Metabolism	53	0.56425	B	2	chromosome	9393	NO	5
pBN	pPC_Library	over300	Virion structure and DNA packaging	Unknown	Unknown	9	HBA75_03805	cdr	CoA-disulfide reductase	P	Metabolism	9	0.095816	C	3	chromosome	9393	NO
pBN	pPC_Library	over300	Virion structure and DNA packaging	Unknown	Unknown	9	HBA75_08385	phnT	ABC transporter ATP-binding protein	P	Metabolism	12	0.127755	C	2	chromosome	9393	NO	6
pBN	pPC_Library	over300	Virion structure and DNA packaging	Unknown	Unknown	9	HBA75_11115	atoD	acetate CoA-transferase subunit alpha	I	Metabolism	8	0.0851698	C	2	chromosome	9393	NO	1
pBN	pPC_Library	over300	Virion structure and DNA packaging	Unknown	Unknown	9	HBA75_12120		non-ribosomal peptide synthetase	Q	Metabolism	28	0.298094	B	3	chromosome	9393	NO	4
pBN	pPC_Library	over300	Virion structure and DNA packaging	Unknown	Unknown	9	HBA75_25540	fadM	proline dehydrogenase	E	Metabolism	3	0.0319387	C	2	chromosome	9393	NO	1
pBC	pPN_Library	over300	Virion structure and DNA packaging	Unknown	Unknown	9	HBA75_19105	priA	primosomal protein N'	L	Information storage and processing	1	0.011554	C	1	chromosome	8655	NO	1
pBC	pPN_Library	over300	Virion structure and DNA packaging	Unknown	Unknown	9	HBA75_22900	pheS	phenylalanine--tRNA ligase subunit alpha	J	Information storage and processing	1	0.011554	C	1	chromosome	8655	C	2
pBC	pPN_Library	over300	Virion structure and DNA packaging	Unknown	Unknown	9	HBA75_26395		phage tail family protein	S	Poorly characterized	1	0.011554	C	2	chromosome	8655	C	2
pBN	pPN_Library	under300	Virion structure and DNA packaging	Unknown	Unknown	9	HBA75_05625	addA	helicase-exonuclease AddAB subunit AddA	L	Information storage and processing	1	0.00297415	C	1	chromosome	33623	NO	1
pBN	pPN_Library	over300	Virion structure and DNA packaging	Unknown	Unknown	9	HBA75_06105	putP	sodium/proline symporter PutP	E	Metabolism	3	0.0266975	C	4	chromosome	11237	NO	2
pBN	pPN_Library	over300	Virion structure and DNA packaging	Unknown	Unknown	9	HBA75_18010	hutI	imidazolonepropionase	Q	Metabolism	4	0.0355967	C	2	chromosome	11237	NO	3
pBN	pPC_Library	over300	Virion structure and DNA packaging	Unknown	Unknown	9	HBA75_04365		methyltransferase	L	Information storage and processing	13	0.138401	C	3	chromosome	9393	NO	11
pBN	pPN_Library	over300	Virion structure and DNA packaging	Unknown	Unknown	9	HBA75_04365		methyltransferase	L	Information storage and processing	6	0.053395	C	3	chromosome	11237	NO	11
pBN	pPN_Library	over300	Virion structure and DNA packaging	Unknown	Unknown	9	HBA75_24455	menF	isochorismate synthase	H	Metabolism	2	0.0177983	C	3	chromosome	11237	NO	2
pBN	pPN_Library	over300	Virion structure and DNA packaging	Unknown	Unknown	9	HBA75_26060		endopeptidase	M	Cellular processes and signaling	2	0.0177983	C	4	chromosome	11237	NO	1
pBN	pPN_Library	under300	Virion structure and DNA packaging	Unknown	Unknown	9	HBA75_26060		endopeptidase	M	Cellular processes and signaling	2	0.00594831	C	4	chromosome	33623	NO	1
pBN	pPN_Library	over300	Virion structure and DNA packaging	Unknown	Unknown	9	HBA75_26390	virB5	peptidase S74	U	Cellular processes and signaling	56	0.498354	B	3	chromosome	11237	NO	1
pBN	pPN_Library	under300	Virion structure and DNA packaging	Unknown	Unknown	9	HBA75_27790	mmgA	acetyl-CoA C-acetyltransferase	I	Metabolism	1	0.00297415	C	3	chromosome	33623	NO	2
pBN	pPN_Library	over300	Virion structure and DNA packaging	Unknown	Unknown	9	HBA75_29670	ltrA	group II intron reverse transcriptase/maturase	L	Information storage and processing	3	0.0266975	C	4	pLUSID1	11237	NO	2
pBN	pPN_Library	over300	Virion structure and DNA packaging	Unknown	Unknown	9	HBA75_30985		phage tail tape measure protein	D	Cellular processes and signaling	1	0.00889917	C	2	pLUSID3	11237	NO	5
pBN	pPN_Library	over300	Virion structure and DNA packaging	Unknown	Unknown	9	HBA75_04390		ABC transporter permease	P	Metabolism	4	0.0355967	C	4	chromosome	11237	NO
pBN	pPC_Library	over300	Virion structure and DNA packaging	Unknown	Unknown	9	HBA75_04720		alpha/beta fold hydrolase	G	Metabolism	1	0.0106462	C	3	chromosome	9393	NO	11
pBN	pPC_Library	over300	Virion structure and DNA packaging	Unknown	Unknown	9	HBA75_05095	oxdD	oxalate decarboxylase family bicupin	G	Metabolism	2	0.0212925	C	3	chromosome	9393	NO	7
pBN	pPN_Library	over300	Virion structure and DNA packaging	Unknown	Unknown	9	HBA75_05385	cytR	LacI family DNA-binding transcriptional regulator	K	Information storage and processing	1	0.00889917	C		chromosome	11237	NO
pBN	pPN_Library	over300	Virion structure and DNA packaging	Unknown	Unknown	9	HBA75_06210	sucA	2-oxoglutarate dehydrogenase E1 component	C	Metabolism	5	0.0444959	C	2	chromosome	11237	NO
pBN	pPN_Library	under300	Virion structure and DNA packaging	Unknown	Unknown	9	HBA75_06210	sucA	2-oxoglutarate dehydrogenase E1 component	C	Metabolism	1	0.00297415	C	2	chromosome	33623	NO
pBN	pPN_Library	under300	Virion structure and DNA packaging	Unknown	Unknown	9	HBA75_06365	ykwD	serine protease	J	Information storage and processing	1	0.00297415	C	2	chromosome	33623	NO
pBN	pPN_Library	over300	Virion structure and DNA packaging	Unknown	Unknown	9	HBA75_08705	sfcA	oxaloacetate-decarboxylating malate dehydrogenase	C	Metabolism	1	0.00889917	C	3	chromosome	11237	NO
pBN	pPN_Library	over300	Virion structure and DNA packaging	Unknown	Unknown	9	HBA75_10215		hypothetical protein	T	Cellular processes and signaling	1	0.00889917	C	1	chromosome	11237	NO
pBC	pPC_Library	over300	Virion structure and DNA packaging	Unknown	Unknown	9	HBA75_11325	prpD	2-methylcitrate dehydratase	S	Poorly characterized	1	0.00952925	C	2	chromosome	10494	C	8
pBN	pPC_Library	over300	Virion structure and DNA packaging	Unknown	Unknown	9	HBA75_11325	prpD	2-methylcitrate dehydratase	S	Poorly characterized	10	0.106462	C	2	chromosome	9393	NO	8
pBN	pPC_Library	over300	Virion structure and DNA packaging	Unknown	Unknown	9	HBA75_12125		non-ribosomal peptide synthetase	Q	Metabolism	200	2.12925	B	3	chromosome	9393	NO	8
pBN	pPC_Library	over300	Virion structure and DNA packaging	Unknown	Unknown	9	HBA75_12130		amino acid adenylation domain-containing protein	Q	Metabolism	206	2.19312	B	3	chromosome	9393	NO	8
pBN	pPN_Library	over300	Virion structure and DNA packaging	Unknown	Unknown	9	HBA75_13700	opuAC	glycine/betaine ABC transporter	E	Metabolism	1	0.00889917	C	2	chromosome	11237	NO
pBN	pPN_Library	over300	Virion structure and DNA packaging	Unknown	Unknown	9	HBA75_13730		chitin-binding protein	S	Poorly characterized	1	0.00889917	C	3	chromosome	11237	NO
pBC	pPC_Library	over300	Virion structure and DNA packaging	Unknown	Unknown	9	HBA75_14680	proB	glutamate 5-kinase	E	Metabolism	7	0.0667048	C	1	chromosome	10494	C	15
pBN	pPN_Library	over300	Virion structure and DNA packaging	Unknown	Unknown	9	HBA75_15745		DHA2 family efflux MFS transporter permease subunit	E	Metabolism	2	0.0177983	C	3	chromosome	11237	NO
pBN	pPC_Library	over300	Virion structure and DNA packaging	Unknown	Unknown	9	HBA75_16405	rfbG	CDP-glucose 4.6-dehydratase	G	Metabolism	629	6.69648	B	3	chromosome	9393	NO	12
pBN	pPN_Library	over300	Virion structure and DNA packaging	Unknown	Unknown	9	HBA75_16405	rfbG	CDP-glucose 4.6-dehydratase	G	Metabolism	1	0.00889917	C	3	chromosome	11237	NO	12
pBN	pPN_Library	over300	Virion structure and DNA packaging	Unknown	Unknown	9	HBA75_16415	galE7	NAD-dependent epimerase/dehydratase family protein	G	Metabolism	1	0.00889917	C	3	chromosome	11237	NO
pBN	pPN_Library	under300	Virion structure and DNA packaging	Unknown	Unknown	9	HBA75_16415	galE7	NAD-dependent epimerase/dehydratase family protein	G	Metabolism	1	0.00297415	C	3	chromosome	33623	NO
pBN	pPN_Library	over300	Virion structure and DNA packaging	Unknown	Unknown	9	HBA75_17380		VOC family protein	S	Poorly characterized	1	0.00889917	C	2	chromosome	11237	NO
pBC	pPC_Library	over300	Virion structure and DNA packaging	Unknown	Unknown	9	HBA75_18825	infB	translation initiation factor IF-2	J	Information storage and processing	1650	15.7233	A	2	chromosome	10494	B	24
pBN	pPC_Library	over300	Virion structure and DNA packaging	Unknown	Unknown	9	HBA75_18825	infB	translation initiation factor IF-2	J	Information storage and processing	2	0.0212925	C	2	chromosome	9393	C	24
pBC	pPN_Library	over300	Virion structure and DNA packaging	Unknown	Unknown	9	HBA75_18825	infB	translation initiation factor IF-2	J	Information storage and processing	78	0.901213	B	2	chromosome	8655	B	24
pBN	pPN_Library	over300	Virion structure and DNA packaging	Unknown	Unknown	9	HBA75_19040	yloV	DAK2 domain-containing protein	S	Poorly characterized	2	0.0177983	C	2	chromosome	11237	NO
pBN	pPN_Library	under300	Virion structure and DNA packaging	Unknown	Unknown	9	HBA75_19170	pyrE	orotate phosphoribosyltransferase	F	Metabolism	1	0.00297415	C		chromosome	33623	NO
pBN	pPN_Library	over300	Virion structure and DNA packaging	Unknown	Unknown	9	HBA75_19175	pyrF	orotidine-5'-phosphate decarboxylase	F	Metabolism	9	0.0800926	C	3	chromosome	11237	NO
pBC	pPN_Library	over300	Virion structure and DNA packaging	Unknown	Unknown	9	HBA75_19290	ftsZ	cell division protein FtsZ	D	Cellular processes and signaling	39	0.450607	B	2	chromosome	8655	B	24
pBN	pPN_Library	over300	Virion structure and DNA packaging	Unknown	Unknown	9	HBA75_19290	ftsZ	cell division protein FtsZ	D	Cellular processes and signaling	11	0.0978909	C	2	chromosome	11237	B	24
pBN	pPN_Library	under300	Virion structure and DNA packaging	Unknown	Unknown	9	HBA75_19290	ftsZ	cell division protein FtsZ	D	Cellular processes and signaling	18	0.0535348	C	2	chromosome	33623	B	24
pBC	pPC_Library	over300	Virion structure and DNA packaging	Unknown	Unknown	9	HBA75_19295	ftsA	cell division protein FtsA	D	Cellular processes and signaling	201	1.91538	B	3	chromosome	10494	A	31
pBN	pPC_Library	over300	Virion structure and DNA packaging	Unknown	Unknown	9	HBA75_19295	ftsA	cell division protein FtsA	D	Cellular processes and signaling	165	1.75663	B	3	chromosome	9393	C	31
pBC	pPN_Library	over300	Virion structure and DNA packaging	Unknown	Unknown	9	HBA75_19295	ftsA	cell division protein FtsA	D	Cellular processes and signaling	4	0.0462161	C	3	chromosome	8655	B	31
pBN	pPN_Library	over300	Virion structure and DNA packaging	Unknown	Unknown	9	HBA75_19295	ftsA	cell division protein FtsA	D	Cellular processes and signaling	1	0.00889917	C	3	chromosome	11237	NO	31
pBN	pPC_Library	over300	Virion structure and DNA packaging	Unknown	Unknown	9	HBA75_19610	lpdA	dihydrolipoyl dehydrogenase	C	Metabolism	1	0.0106462	C	1	chromosome	9393	NO
pBN	pPN_Library	over300	Virion structure and DNA packaging	Unknown	Unknown	9	HBA75_20185	spoIIAB	anti-sigma F factor	F	Metabolism	1	0.00889917	C	3	chromosome	11237	NO
pBN	pPN_Library	over300	Virion structure and DNA packaging	Unknown	Unknown	9	HBA75_20585	artQ	amino acid ABC transporter permease	E	Metabolism	1	0.00889917	C	2	chromosome	11237	NO
pBC	pPN_Library	over300	Virion structure and DNA packaging	Unknown	Unknown	9	HBA75_20835	yqhT	Xaa-Pro dipeptidase	E	Metabolism	472	5.4535	B	2	chromosome	8655	B	18
pBN	pPC_Library	over300	Virion structure and DNA packaging	Unknown	Unknown	9	HBA75_21275	nfo	deoxyribonuclease IV	L	Information storage and processing	6	0.0638774	C	2	chromosome	9393	NO
pBN	pPN_Library	under300	Virion structure and DNA packaging	Unknown	Unknown	9	HBA75_22160	virB5	peptidase S74	U	Cellular processes and signaling	3	0.00892246	C	2	chromosome	33623	NO
pBC	pPC_Library	over300	Virion structure and DNA packaging	Unknown	Unknown	9	HBA75_22945	ysdC	M42 family metallopeptidase	G	Metabolism	2165	20.6308	A	3	chromosome	10494	A	34
pBN	pPC_Library	over300	Virion structure and DNA packaging	Unknown	Unknown	9	HBA75_22945	ysdC	M42 family metallopeptidase	G	Metabolism	98	1.04333	B	3	chromosome	9393	A	34
pBC	pPN_Library	over300	Virion structure and DNA packaging	Unknown	Unknown	9	HBA75_22945	ysdC	M42 family metallopeptidase	G	Metabolism	412	4.76025	B	3	chromosome	8655	A	34
pBN	pPN_Library	over300	Virion structure and DNA packaging	Unknown	Unknown	9	HBA75_22945	ysdC	M42 family metallopeptidase	G	Metabolism	1	0.00889917	C	3	chromosome	11237	B	34
pBC	pPC_Library	over300	Virion structure and DNA packaging	Unknown	Unknown	9	HBA75_23085	pyk	pyruvate kinase	G	Metabolism	3	0.0285878	C	3	chromosome	10494	B	26
pBN	pPC_Library	over300	Virion structure and DNA packaging	Unknown	Unknown	9	HBA75_23085	pyk	pyruvate kinase	G	Metabolism	842	8.96412	B	3	chromosome	9393	C	26
pBN	pPC_Library	over300	Virion structure and DNA packaging	Unknown	Unknown	9	HBA75_23535	pncB	nicotinate phosphoribosyltransferase	H	Metabolism	15	0.159693	C	2	chromosome	9393	NO	8
pBC	pPC_Library	over300	Virion structure and DNA packaging	Unknown	Unknown	9	HBA75_23625	pepV	dipeptidase PepV	E	Metabolism	322	3.06842	B	2	chromosome	10494	B	29
pBN	pPC_Library	over300	Virion structure and DNA packaging	Unknown	Unknown	9	HBA75_23625	pepV	dipeptidase PepV	E	Metabolism	1	0.0106462	C	2	chromosome	9393	C	29
pBC	pPN_Library	over300	Virion structure and DNA packaging	Unknown	Unknown	9	HBA75_23625	pepV	dipeptidase PepV	E	Metabolism	23	0.265742	B	2	chromosome	8655	B	29
pBN	pPN_Library	over300	Virion structure and DNA packaging	Unknown	Unknown	9	HBA75_25355	yhfC	YhfC family intramembrane metalloprotease	S	Poorly characterized	1	0.00889917	C	3	chromosome	11237	NO
pBN	pPN_Library	under300	Virion structure and DNA packaging	Unknown	Unknown	9	HBA75_25355	yhfC	YhfC family intramembrane metalloprotease	S	Poorly characterized	2	0.00594831	C	3	chromosome	33623	NO
pBN	pPC_Library	over300	Virion structure and DNA packaging	Unknown	Unknown	9	HBA75_25400	sufB	Fe-S cluster assembly protein SufB	O	Cellular processes and signaling	336	3.57713	B	3	chromosome	9393	NO	16
pBC	pPN_Library	over300	Virion structure and DNA packaging	Unknown	Unknown	9	HBA75_31050	recA	recombinase RecA	L	Information storage and processing	1	0.011554	C	2	pLUSID3	8655	B	4
pBN	pPN_Library	under300	Virion structure and DNA packaging	Unknown	Unknown	9	HBA75_26325	pgk	phosphoglycerate kinase	F	Metabolism	2	0.00594831	C	3	chromosome	33623	NO
pBN	pPC_Library	over300	Virion structure and DNA packaging	Unknown	Unknown	9	HBA75_26335	cggR	gapA transcriptional regulator CggR	K	Information storage and processing	31	0.330033	B	2	chromosome	9393	NO	9
pBN	pPN_Library	over300	Virion structure and DNA packaging	Unknown	Unknown	9	HBA75_26375		phage holin family protein	S	Poorly characterized	1	0.00889917	C	3	chromosome	11237	NO
pBN	pPC_Library	over300	Virion structure and DNA packaging	Unknown	Unknown	9	HBA75_27605	atpA	F0F1 ATP synthase subunit alpha	C	Metabolism	1	0.0106462	C	4	chromosome	9393	NO
pBN	pPN_Library	over300	Virion structure and DNA packaging	Unknown	Unknown	9	HBA75_27605	atpA	F0F1 ATP synthase subunit alpha	C	Metabolism	1	0.00889917	C	4	chromosome	11237	NO
pBN	pPN_Library	under300	Virion structure and DNA packaging	Unknown	Unknown	9	HBA75_27605	atpA	F0F1 ATP synthase subunit alpha	C	Metabolism	1	0.00297415	C	4	chromosome	33623	NO
pBN	pPN_Library	over300	Virion structure and DNA packaging	Unknown	Unknown	9	HBA75_28385	vicX	MBL fold metallo-hydrolase	S	Poorly characterized	2	0.0177983	C	3	chromosome	11237	NO
pBC	pPN_Library	over300	Virion structure and DNA packaging	Unknown	Unknown	9	HBA75_30425	ahpF	alkyl hydroperoxide reductase subunit F	O	Cellular processes and signaling	161	1.8602	B	3	pLUSID2	8655	B	20
pBC	pPC_Library	over300	Virion structure and DNA packaging	Unknown	Unknown	9	HBA75_30450		dipeptide epimerase	M	Cellular processes and signaling	2812	26.7963	A	3	pLUSID2	10494	A	31
pBN	pPC_Library	over300	Virion structure and DNA packaging	Unknown	Unknown	9	HBA75_30450		dipeptide epimerase	M	Cellular processes and signaling	4461	47.4928	A	3	pLUSID2	9393	A	31
pBC	pPN_Library	over300	Virion structure and DNA packaging	Unknown	Unknown	9	HBA75_30450		dipeptide epimerase	M	Cellular processes and signaling	6	0.0693241	C	3	pLUSID2	8655	B	31
pBN	pPC_Library	over300	Virion structure and DNA packaging	Unknown	Unknown	9	HBA75_30635		IS110 family transposase	L	Information storage and processing	3	0.0319387	C	4	pLUSID2	9393	NO	9
pBN	pPN_Library	over300	Virion structure and DNA packaging	Unknown	Unknown	9	HBA75_30635		IS110 family transposase	L	Information storage and processing	1	0.00889917	C	4	pLUSID2	11237	NO	9
pBN	pPC_Library	over300	Virion structure and DNA packaging	Unknown	Unknown	9	HBA75_30685	yfkA	radical SAM/CxCxxxxC motif protein YfkAB	S	Poorly characterized	333	3.54519	B	3	pLUSID2	9393	NO	7
pBC	pPC_Library	over300	Virion structure and DNA packaging	Unknown	Unknown	9	HBA75_30720		IS4 family transposase	L	Information storage and processing	2390	22.7749	A	3	pLUSID2	10494	B	29
pBN	pPC_Library	over300	Virion structure and DNA packaging	Unknown	Unknown	9	HBA75_30720		IS4 family transposase	L	Information storage and processing	67	0.713297	B	3	pLUSID2	9393	B	29
pBC	pPN_Library	over300	Virion structure and DNA packaging	Unknown	Unknown	9	HBA75_30720		IS4 family transposase	L	Information storage and processing	21	0.242634	C	3	pLUSID2	8655	B	29
pBN	pPN_Library	over300	Virion structure and DNA packaging	Unknown	Unknown	9	HBA75_30865		DNA primase	S	Poorly characterized	2	0.0177983	C	2	pLUSID3	11237	NO
pBN	pPN_Library	over300	Virion structure and DNA packaging	Special vertex/DNA packaging	DNA packaging*	10	HBA75_00400	yabM	oligosaccharide flippase family protein	S	Poorly characterized	1	0.00776759	C	3	chromosome	12874	NO
pBC	pPN_Library	under300	Virion structure and DNA packaging	Special vertex/DNA packaging	DNA packaging*	10	HBA75_00740	rpsG	30S ribosomal protein S7	J	Information storage and processing	10	0.0104894	C	2	chromosome	95334	NO
pBC	pPC_Library	over300	Virion structure and DNA packaging	Special vertex/DNA packaging	DNA packaging*	10	HBA75_00745	fusA	elongation factor G	J	Information storage and processing	2	0.020829	C	2	chromosome	9602	C	10
pBC	pPN_Library	over300	Virion structure and DNA packaging	Special vertex/DNA packaging	DNA packaging*	10	HBA75_00745	fusA	elongation factor G	J	Information storage and processing	12	0.103324	C	4	chromosome	11614	C	10
pBC	pPN_Library	under300	Virion structure and DNA packaging	Special vertex/DNA packaging	DNA packaging*	10	HBA75_00745	fusA	elongation factor G	J	Information storage and processing	44	0.0461535	C	4	chromosome	95334	C	10
pBN	pPN_Library	over300	Virion structure and DNA packaging	Special vertex/DNA packaging	DNA packaging*	10	HBA75_00745	fusA	elongation factor G	J	Information storage and processing	6	0.0466056	C	4	chromosome	12874	NO	10
pBN	pPN_Library	over300	Virion structure and DNA packaging	Special vertex/DNA packaging	DNA packaging*	10	HBA75_00795	rplP	50S ribosomal protein L16	J	Information storage and processing	1	0.00776759	C	3	chromosome	12874	NO
pBN	pPN_Library	under300	Virion structure and DNA packaging	Special vertex/DNA packaging	DNA packaging*	10	HBA75_00795	rplP	50S ribosomal protein L16	J	Information storage and processing	4	0.00988362	C	3	chromosome	40471	NO
pBC	pPN_Library	over300	Virion structure and DNA packaging	Special vertex/DNA packaging	DNA packaging*	10	HBA75_00865	adk	adenylate kinase	F	Metabolism	3	0.0258309	C	3	chromosome	11614	C
pBC	pPN_Library	under300	Virion structure and DNA packaging	Special vertex/DNA packaging	DNA packaging*	10	HBA75_00865	adk	adenylate kinase	F	Metabolism	42	0.0440556	C	3	chromosome	95334	C
pBN	pPN_Library	over300	Virion structure and DNA packaging	Special vertex/DNA packaging	DNA packaging*	10	HBA75_01050	glmS	glutamine--fructose-6-phosphate transaminase (isomerizing)	M	Cellular processes and signaling	1	0.00776759	C	3	chromosome	12874	NO
pBC	pPC_Library	over300	Virion structure and DNA packaging	Special vertex/DNA packaging	DNA packaging*	10	HBA75_01455	alr	alanine racemase	E	Metabolism	57	0.593626	B	2	chromosome	9602	B	30
pBC	pPC_Library	under300	Virion structure and DNA packaging	Special vertex/DNA packaging	DNA packaging*	10	HBA75_01455	alr	alanine racemase	E	Metabolism	2982	17.04	A	2	chromosome	17500	B	30
pBN	pPC_Library	under300	Virion structure and DNA packaging	Special vertex/DNA packaging	DNA packaging*	10	HBA75_01455	alr	alanine racemase	E	Metabolism	1	0.00301087	C	2	chromosome	33213	B	30
pBC	pPN_Library	under300	Virion structure and DNA packaging	Special vertex/DNA packaging	DNA packaging*	10	HBA75_01455	alr	alanine racemase	E	Metabolism	1	0.00104894	C		chromosome	95334	NO	30
pBN	pPN_Library	over300	Virion structure and DNA packaging	Special vertex/DNA packaging	DNA packaging*	10	HBA75_01860	purS	phosphoribosylformylglycinamidine synthase subunit PurS	F	Metabolism	1	0.00776759	C	2	chromosome	12874	NO
pBC	pPN_Library	over300	Virion structure and DNA packaging	Special vertex/DNA packaging	DNA packaging*	10	HBA75_01890	purH	bifunctional phosphoribosylaminoimidazolecarboxamide formyltransferase/IMP cyclohydrolase	F	Metabolism	2	0.0172206	C	2	chromosome	11614	NO
pBC	pPN_Library	under300	Virion structure and DNA packaging	Special vertex/DNA packaging	DNA packaging*	10	HBA75_01890	purH	bifunctional phosphoribosylaminoimidazolecarboxamide formyltransferase/IMP cyclohydrolase	F	Metabolism	20	0.0209789	C	2	chromosome	95334	NO
pBN	pPN_Library	over300	Virion structure and DNA packaging	Special vertex/DNA packaging	DNA packaging*	10	HBA75_01995	gatA	Asp-tRNA(Asn)/Glu-tRNA(Gln) amidotransferase subunit GatA	J	Information storage and processing	1	0.00776759	C	2	chromosome	12874	NO
pBN	pPN_Library	over300	Virion structure and DNA packaging	Special vertex/DNA packaging	DNA packaging*	10	HBA75_02375	gltA	glutamate synthase	E	Metabolism	1	0.00776759	C	2	chromosome	12874	NO
pBC	pPC_Library	over300	Virion structure and DNA packaging	Special vertex/DNA packaging	DNA packaging*	10	HBA75_02620	citH	CitMHS family transporter	C	Metabolism	3	0.0312435	C	3	chromosome	9602	NO	10
pBN	pPC_Library	over300	Virion structure and DNA packaging	Special vertex/DNA packaging	DNA packaging*	10	HBA75_02620	citH	CitMHS family transporter	C	Metabolism	6	0.0583544	C	3	chromosome	10282	NO	10
pBN	pPN_Library	over300	Virion structure and DNA packaging	Special vertex/DNA packaging	DNA packaging*	10	HBA75_02620	citH	CitMHS family transporter	C	Metabolism	3	0.0233028	C	4	chromosome	12874	NO	10
pBN	pPN_Library	over300	Virion structure and DNA packaging	Special vertex/DNA packaging	DNA packaging*	10	HBA75_03035	alsT	alanine:cation symporter family protein	E	Metabolism	2	0.0155352	C	3	chromosome	12874	NO
pBC	pPC_Library	over300	Virion structure and DNA packaging	Special vertex/DNA packaging	DNA packaging*	10	HBA75_03335	yjbQ	sodium:proton antiporter	P	Metabolism	1	0.0104145	C	2	chromosome	9602	NO	7
pBC	pPN_Library	under300	Virion structure and DNA packaging	Special vertex/DNA packaging	DNA packaging*	10	HBA75_03560	ylbB	CBS domain-containing protein	T	Cellular processes and signaling	1	0.00104894	C		chromosome	95334	NO
pBC	pPC_Library	over300	Virion structure and DNA packaging	Special vertex/DNA packaging	DNA packaging*	10	HBA75_03595	nrtA	ABC transporter substrate-binding protein	P	Metabolism	1128	11.7476	A	3	chromosome	9602	A	31
pBC	pPC_Library	under300	Virion structure and DNA packaging	Special vertex/DNA packaging	DNA packaging*	10	HBA75_03595	nrtA	ABC transporter substrate-binding protein	P	Metabolism	457	2.61143	B	3	chromosome	17500	A	31
pBC	pPN_Library	over300	Virion structure and DNA packaging	Special vertex/DNA packaging	DNA packaging*	10	HBA75_03595	nrtA	ABC transporter substrate-binding protein	P	Metabolism	2	0.0172206	C	2	chromosome	11614	NO	31
pBC	pPN_Library	under300	Virion structure and DNA packaging	Special vertex/DNA packaging	DNA packaging*	10	HBA75_03595	nrtA	ABC transporter substrate-binding protein	P	Metabolism	3	0.00314683	C	2	chromosome	95334	NO	31
pBC	pPN_Library	over300	Virion structure and DNA packaging	Special vertex/DNA packaging	DNA packaging*	10	HBA75_03615	thiG	thiazole synthase	H	Metabolism	1870	16.1013	A	2	chromosome	11614	A	25
pBC	pPN_Library	under300	Virion structure and DNA packaging	Special vertex/DNA packaging	DNA packaging*	10	HBA75_03615	thiG	thiazole synthase	H	Metabolism	125	0.131118	C	2	chromosome	95334	A	25
pBN	pPN_Library	over300	Virion structure and DNA packaging	Special vertex/DNA packaging	DNA packaging*	10	HBA75_03670	yvmA	MFS transporter	E	Metabolism	8	0.0621407	C	4	chromosome	12874	NO
pBN	pPN_Library	under300	Virion structure and DNA packaging	Special vertex/DNA packaging	DNA packaging*	10	HBA75_03685	pbuO	NCS2 family permease	S	Poorly characterized	1	0.00247091	C	1	chromosome	40471	NO
pBC	pPC_Library	over300	Virion structure and DNA packaging	Special vertex/DNA packaging	DNA packaging*	10	HBA75_03795		DUF3238 domain-containing protein	S	Poorly characterized	12	0.124974	C	1	chromosome	9602	C	12
pBC	pPC_Library	under300	Virion structure and DNA packaging	Special vertex/DNA packaging	DNA packaging*	10	HBA75_03795		DUF3238 domain-containing protein	S	Poorly characterized	15	0.0857143	C	1	chromosome	17500	C	12
pBC	pPN_Library	over300	Virion structure and DNA packaging	Special vertex/DNA packaging	DNA packaging*	10	HBA75_03795		DUF3238 domain-containing protein	S	Poorly characterized	18	0.154985	C	2	chromosome	11614	C	12
pBC	pPN_Library	under300	Virion structure and DNA packaging	Special vertex/DNA packaging	DNA packaging*	10	HBA75_03795		DUF3238 domain-containing protein	S	Poorly characterized	96	0.100699	C	2	chromosome	95334	C	12
pBC	pPN_Library	over300	Virion structure and DNA packaging	Special vertex/DNA packaging	DNA packaging*	10	HBA75_31050	recA	recombinase RecA	L	Information storage and processing	24	0.206647	C	2	pLUSID3	11614	B	4
pBC	pPC_Library	over300	Virion structure and DNA packaging	Special vertex/DNA packaging	DNA packaging*	10	HBA75_03905		DUF871 domain-containing protein	S	Poorly characterized	2	0.020829	C	2	chromosome	9602	C
pBC	pPC_Library	under300	Virion structure and DNA packaging	Special vertex/DNA packaging	DNA packaging*	10	HBA75_03905		DUF871 domain-containing protein	S	Poorly characterized	1	0.00571429	C	2	chromosome	17500	C
pBN	pPN_Library	over300	Virion structure and DNA packaging	Special vertex/DNA packaging	DNA packaging*	10	HBA75_04365		methyltransferase	L	Information storage and processing	1	0.00776759	C	3	chromosome	12874	NO	11
pBC	pPC_Library	over300	Virion structure and DNA packaging	Special vertex/DNA packaging	DNA packaging*	10	HBA75_11115	atoD	acetate CoA-transferase subunit alpha	I	Metabolism	24	0.249948	C	2	chromosome	9602	C	1
pBC	pPC_Library	under300	Virion structure and DNA packaging	Special vertex/DNA packaging	DNA packaging*	10	HBA75_11115	atoD	acetate CoA-transferase subunit alpha	I	Metabolism	1	0.00571429	C	2	chromosome	17500	C	1
pBC	pPC_Library	over300	Virion structure and DNA packaging	Special vertex/DNA packaging	DNA packaging*	10	HBA75_16530	ribD	bifunctional diaminohydroxyphosphoribosylaminopyrimidine deaminase/5-amino-6-(5-phosphoribosylamino)uracil reductase RibD	H	Metabolism	1	0.0104145	C		chromosome	9602	NO	3
pBC	pPC_Library	over300	Virion structure and DNA packaging	Special vertex/DNA packaging	DNA packaging*	10	HBA75_19620	pdhB	pyruvate dehydrogenase complex E1 component subunit beta	C	Metabolism	12	0.124974	C	2	chromosome	9602	C	2
pBC	pPC_Library	under300	Virion structure and DNA packaging	Special vertex/DNA packaging	DNA packaging*	10	HBA75_19620	pdhB	pyruvate dehydrogenase complex E1 component subunit beta	C	Metabolism	15	0.0857143	C	2	chromosome	17500	C	2
pBN	pPN_Library	over300	Virion structure and DNA packaging	Special vertex/DNA packaging	DNA packaging*	10	HBA75_04390		ABC transporter permease	P	Metabolism	5	0.038838	C	4	chromosome	12874	NO
pBC	pPC_Library	over300	Virion structure and DNA packaging	Special vertex/DNA packaging	DNA packaging*	10	HBA75_22050	ompR	response regulator transcription factor	T	Cellular processes and signaling	3	0.0312435	C	2	chromosome	9602	NO	1
pBC	pPC_Library	under300	Virion structure and DNA packaging	Special vertex/DNA packaging	DNA packaging*	10	HBA75_22050	ompR	response regulator transcription factor	T	Cellular processes and signaling	1	0.00571429	C	2	chromosome	17500	NO	1
pBC	pPC_Library	over300	Virion structure and DNA packaging	Special vertex/DNA packaging	DNA packaging*	10	HBA75_22900	pheS	phenylalanine--tRNA ligase subunit alpha	J	Information storage and processing	1	0.0104145	C	1	chromosome	9602	NO	2
pBC	pPC_Library	over300	Virion structure and DNA packaging	Special vertex/DNA packaging	DNA packaging*	10	HBA75_25140	dapF	diaminopimelate epimerase	E	Metabolism	64	0.666528	B	1	chromosome	9602	C	1
pBC	pPC_Library	under300	Virion structure and DNA packaging	Special vertex/DNA packaging	DNA packaging*	10	HBA75_25140	dapF	diaminopimelate epimerase	E	Metabolism	117	0.668571	B	1	chromosome	17500	C	1
pBC	pPC_Library	over300	Virion structure and DNA packaging	Special vertex/DNA packaging	DNA packaging*	10	HBA75_26415		phage tail protein	S	Poorly characterized	70	0.729015	B	1	chromosome	9602	NO	2
pBC	pPC_Library	under300	Virion structure and DNA packaging	Special vertex/DNA packaging	DNA packaging*	10	HBA75_26415		phage tail protein	S	Poorly characterized	1205	6.88571	B	1	chromosome	17500	NO	2
pBC	pPC_Library	over300	Virion structure and DNA packaging	Special vertex/DNA packaging	DNA packaging*	10	HBA75_27930	GDPD	glycerophosphodiester phosphodiesterase	C	Metabolism	11	0.114559	C	1	chromosome	9602	B	6
pBC	pPC_Library	under300	Virion structure and DNA packaging	Special vertex/DNA packaging	DNA packaging*	10	HBA75_27930	GDPD	glycerophosphodiester phosphodiesterase	C	Metabolism	8	0.0457143	C	1	chromosome	17500	B	6
pBC	pPC_Library	over300	Virion structure and DNA packaging	Special vertex/DNA packaging	DNA packaging*	10	HBA75_30675	fumB	class I fumarate hydratase	C	Metabolism	16	0.166632	C	2	pLUSID2	9602	C	4
pBC	pPC_Library	under300	Virion structure and DNA packaging	Special vertex/DNA packaging	DNA packaging*	10	HBA75_30675	fumB	class I fumarate hydratase	C	Metabolism	4	0.0228571	C	2	pLUSID2	17500	C	4
pBC	pPN_Library	under300	Virion structure and DNA packaging	Special vertex/DNA packaging	DNA packaging*	10	HBA75_04405	oppF	ABC transporter ATP-binding protein	E	Metabolism	1	0.00104894	C	2	chromosome	95334	NO
pBN	pPC_Library	over300	Virion structure and DNA packaging	Special vertex/DNA packaging	DNA packaging*	10	HBA75_06105	putP	sodium/proline symporter PutP	E	Metabolism	5	0.0486287	C	4	chromosome	10282	NO	2
pBN	pPC_Library	under300	Virion structure and DNA packaging	Special vertex/DNA packaging	DNA packaging*	10	HBA75_27790	mmgA	acetyl-CoA C-acetyltransferase	I	Metabolism	1	0.00301087	C	3	chromosome	33213	NO	2
pBC	pPC_Library	over300	Virion structure and DNA packaging	Special vertex/DNA packaging	DNA packaging*	10	HBA75_23575	pepA	M42 family metallopeptidase	G	Metabolism	1	0.0104145	C	1	chromosome	9602	NO	3
pBC	pPN_Library	under300	Virion structure and DNA packaging	Special vertex/DNA packaging	DNA packaging*	10	HBA75_00735	rpsL	30S ribosomal protein S12	J	Information storage and processing	1	0.00104894	C	4	chromosome	95334	NO	1
pBC	pPN_Library	over300	Virion structure and DNA packaging	Special vertex/DNA packaging	DNA packaging*	10	HBA75_00835	rplF	50S ribosomal protein L6	J	Information storage and processing	2	0.0172206	C	2	chromosome	11614	B	1
pBC	pPN_Library	under300	Virion structure and DNA packaging	Special vertex/DNA packaging	DNA packaging*	10	HBA75_00835	rplF	50S ribosomal protein L6	J	Information storage and processing	21	0.0220278	C	2	chromosome	95334	B	1
pBC	pPC_Library	over300	Virion structure and DNA packaging	Special vertex/DNA packaging	DNA packaging*	10	HBA75_04720		alpha/beta fold hydrolase	G	Metabolism	3	0.0312435	C	3	chromosome	9602	NO	11
pBC	pPN_Library	over300	Virion structure and DNA packaging	Special vertex/DNA packaging	DNA packaging*	10	HBA75_11115	atoD	acetate CoA-transferase subunit alpha	I	Metabolism	8	0.0688824	C	2	chromosome	11614	C	1
pBC	pPN_Library	under300	Virion structure and DNA packaging	Special vertex/DNA packaging	DNA packaging*	10	HBA75_11115	atoD	acetate CoA-transferase subunit alpha	I	Metabolism	50	0.0524472	C	2	chromosome	95334	C	1
pBC	pPN_Library	over300	Virion structure and DNA packaging	Special vertex/DNA packaging	DNA packaging*	10	HBA75_12045	pepD	beta-Ala-His dipeptidase	E	Metabolism	33	0.28414	B	2	chromosome	11614	C	4
pBC	pPN_Library	under300	Virion structure and DNA packaging	Special vertex/DNA packaging	DNA packaging*	10	HBA75_12045	pepD	beta-Ala-His dipeptidase	E	Metabolism	112	0.117482	C	2	chromosome	95334	C	4
pBC	pPN_Library	over300	Virion structure and DNA packaging	Special vertex/DNA packaging	DNA packaging*	10	HBA75_15240	ydbM	acyl-CoA/acyl-ACP dehydrogenase	I	Metabolism	1	0.0086103	C	2	chromosome	11614	NO	1
pBC	pPN_Library	under300	Virion structure and DNA packaging	Special vertex/DNA packaging	DNA packaging*	10	HBA75_19105	priA	primosomal protein N'	L	Information storage and processing	5	0.00524472	C	1	chromosome	95334	NO	1
pBN	pPC_Library	over300	Virion structure and DNA packaging	Special vertex/DNA packaging	DNA packaging*	10	HBA75_05095	oxdD	oxalate decarboxylase family bicupin	G	Metabolism	1	0.00972573	C	3	chromosome	10282	NO	7
pBC	pPN_Library	under300	Virion structure and DNA packaging	Special vertex/DNA packaging	DNA packaging*	10	HBA75_21235	yqgB	DUF1189 domain-containing protein	S	Poorly characterized	3	0.00314683	C	2	chromosome	95334	NO	1
pBC	pPN_Library	over300	Virion structure and DNA packaging	Special vertex/DNA packaging	DNA packaging*	10	HBA75_22050	ompR	response regulator transcription factor	T	Cellular processes and signaling	3	0.0258309	C	2	chromosome	11614	NO	1
pBC	pPN_Library	under300	Virion structure and DNA packaging	Special vertex/DNA packaging	DNA packaging*	10	HBA75_22050	ompR	response regulator transcription factor	T	Cellular processes and signaling	2	0.00209789	C	2	chromosome	95334	NO	1
pBC	pPN_Library	over300	Virion structure and DNA packaging	Special vertex/DNA packaging	DNA packaging*	10	HBA75_22900	pheS	phenylalanine--tRNA ligase subunit alpha	J	Information storage and processing	10	0.086103	C	1	chromosome	11614	C	2
pBC	pPN_Library	under300	Virion structure and DNA packaging	Special vertex/DNA packaging	DNA packaging*	10	HBA75_22900	pheS	phenylalanine--tRNA ligase subunit alpha	J	Information storage and processing	70	0.0734261	C	1	chromosome	95334	C	2
pBC	pPN_Library	over300	Virion structure and DNA packaging	Special vertex/DNA packaging	DNA packaging*	10	HBA75_23510	ampS	aminopeptidase	E	Metabolism	6	0.0516618	C	2	chromosome	11614	C	4
pBC	pPN_Library	under300	Virion structure and DNA packaging	Special vertex/DNA packaging	DNA packaging*	10	HBA75_23510	ampS	aminopeptidase	E	Metabolism	11	0.0115384	C	2	chromosome	95334	C	4
pBC	pPN_Library	over300	Virion structure and DNA packaging	Special vertex/DNA packaging	DNA packaging*	10	HBA75_24455	menF	isochorismate synthase	H	Metabolism	3	0.0258309	C	3	chromosome	11614	NO	2
pBC	pPN_Library	under300	Virion structure and DNA packaging	Special vertex/DNA packaging	DNA packaging*	10	HBA75_24455	menF	isochorismate synthase	H	Metabolism	22	0.0230768	C	3	chromosome	95334	NO	2
pBC	pPN_Library	over300	Virion structure and DNA packaging	Special vertex/DNA packaging	DNA packaging*	10	HBA75_25320	glpX	class II fructose-bisphosphatase	G	Metabolism	29	0.249699	C	2	chromosome	11614	B	1
pBC	pPN_Library	under300	Virion structure and DNA packaging	Special vertex/DNA packaging	DNA packaging*	10	HBA75_25320	glpX	class II fructose-bisphosphatase	G	Metabolism	30	0.0314683	C	2	chromosome	95334	B	1
pBC	pPN_Library	over300	Virion structure and DNA packaging	Special vertex/DNA packaging	DNA packaging*	10	HBA75_25845	yjlC	DUF1641 domain-containing protein	S	Poorly characterized	13	0.111934	C	3	chromosome	11614	C	2
pBC	pPN_Library	under300	Virion structure and DNA packaging	Special vertex/DNA packaging	DNA packaging*	10	HBA75_25845	yjlC	DUF1641 domain-containing protein	S	Poorly characterized	7	0.00734261	C	3	chromosome	95334	C	2
pBC	pPN_Library	over300	Virion structure and DNA packaging	Special vertex/DNA packaging	DNA packaging*	10	HBA75_26390	virB5	peptidase S74	U	Cellular processes and signaling	1	0.0086103	C	3	chromosome	11614	NO	1
pBC	pPN_Library	over300	Virion structure and DNA packaging	Special vertex/DNA packaging	DNA packaging*	10	HBA75_26395		phage tail family protein	S	Poorly characterized	4	0.0344412	C	2	chromosome	11614	C	2
pBC	pPN_Library	under300	Virion structure and DNA packaging	Special vertex/DNA packaging	DNA packaging*	10	HBA75_26395		phage tail family protein	S	Poorly characterized	14	0.0146852	C	2	chromosome	95334	C	2
pBC	pPN_Library	over300	Virion structure and DNA packaging	Special vertex/DNA packaging	DNA packaging*	10	HBA75_27025	licH	6-phospho-beta-glucosidase	G	Metabolism	6	0.0516618	C	2	chromosome	11614	B	3
pBC	pPN_Library	under300	Virion structure and DNA packaging	Special vertex/DNA packaging	DNA packaging*	10	HBA75_27025	licH	6-phospho-beta-glucosidase	G	Metabolism	53	0.055594	C	2	chromosome	95334	B	3
pBC	pPN_Library	over300	Virion structure and DNA packaging	Special vertex/DNA packaging	DNA packaging*	10	HBA75_27930	GDPD	glycerophosphodiester phosphodiesterase	C	Metabolism	32	0.27553	B	2	chromosome	11614	NO	6
pBC	pPN_Library	under300	Virion structure and DNA packaging	Special vertex/DNA packaging	DNA packaging*	10	HBA75_27930	GDPD	glycerophosphodiester phosphodiesterase	C	Metabolism	157	0.164684	C	2	chromosome	95334	NO	6
pBN	pPN_Library	over300	Virion structure and DNA packaging	Special vertex/DNA packaging	DNA packaging*	10	HBA75_06105	putP	sodium/proline symporter PutP	E	Metabolism	6	0.0466056	C	4	chromosome	12874	NO	2
pBN	pPN_Library	under300	Virion structure and DNA packaging	Special vertex/DNA packaging	DNA packaging*	10	HBA75_06105	putP	sodium/proline symporter PutP	E	Metabolism	1	0.00247091	C	4	chromosome	40471	NO	2
pBC	pPN_Library	under300	Virion structure and DNA packaging	Special vertex/DNA packaging	DNA packaging*	10	HBA75_05620	addB	helicase-exonuclease AddAB subunit AddB	L	Information storage and processing	1	0.00104894	C	2	chromosome	95334	NO
pBC	pPN_Library	under300	Virion structure and DNA packaging	Special vertex/DNA packaging	DNA packaging*	10	HBA75_05775	clpB	ATP-dependent chaperone ClpB	O	Cellular processes and signaling	1	0.00104894	C	2	chromosome	95334	NO
pBC	pPN_Library	under300	Virion structure and DNA packaging	Special vertex/DNA packaging	DNA packaging*	10	HBA75_06195		TOMM precursor leader peptide-binding protein	S	Poorly characterized	1	0.00104894	C	2	chromosome	95334	NO
pBN	pPN_Library	under300	Virion structure and DNA packaging	Special vertex/DNA packaging	DNA packaging*	10	HBA75_21165	glcK	glucokinase	G	Metabolism	1	0.00247091	C	3	chromosome	40471	NO	3
pBN	pPN_Library	over300	Virion structure and DNA packaging	Special vertex/DNA packaging	DNA packaging*	10	HBA75_23425	acuC	acetoin utilization protein AcuC	B	Information storage and processing	2	0.0155352	C	3	chromosome	12874	NO	1
pBN	pPN_Library	under300	Virion structure and DNA packaging	Special vertex/DNA packaging	DNA packaging*	10	HBA75_23425	acuC	acetoin utilization protein AcuC	B	Information storage and processing	1	0.00247091	C	3	chromosome	40471	NO	1
pBN	pPN_Library	over300	Virion structure and DNA packaging	Special vertex/DNA packaging	DNA packaging*	10	HBA75_24455	menF	isochorismate synthase	H	Metabolism	1	0.00776759	C	3	chromosome	12874	NO	2
pBN	pPN_Library	over300	Virion structure and DNA packaging	Special vertex/DNA packaging	DNA packaging*	10	HBA75_24805	pepA	cytosol aminopeptidase	E	Metabolism	4	0.0310704	C	3	chromosome	12874	NO	6
pBN	pPN_Library	over300	Virion structure and DNA packaging	Special vertex/DNA packaging	DNA packaging*	10	HBA75_26390	virB5	peptidase S74	U	Cellular processes and signaling	1	0.00776759	C	3	chromosome	12874	NO	1
pBN	pPN_Library	over300	Virion structure and DNA packaging	Special vertex/DNA packaging	DNA packaging*	10	HBA75_27790	mmgA	acetyl-CoA C-acetyltransferase	I	Metabolism	4	0.0310704	C	3	chromosome	12874	NO	2
pBN	pPN_Library	over300	Virion structure and DNA packaging	Special vertex/DNA packaging	DNA packaging*	10	HBA75_29670	ltrA	group II intron reverse transcriptase/maturase	L	Information storage and processing	13	0.100979	C	4	pLUSID1	12874	NO	2
pBN	pPN_Library	over300	Virion structure and DNA packaging	Special vertex/DNA packaging	DNA packaging*	10	HBA75_30470	dus	tRNA-dihydrouridine synthase	J	Information storage and processing	1	0.00776759	C	2	pLUSID2	12874	NO	1
pBN	pPN_Library	over300	Virion structure and DNA packaging	Special vertex/DNA packaging	DNA packaging*	10	HBA75_30510		phage tail family protein	S	Poorly characterized	1	0.00776759	C	3	pLUSID2	12874	NO	6
pBN	pPN_Library	over300	Virion structure and DNA packaging	Special vertex/DNA packaging	DNA packaging*	10	HBA75_30675	fumB	class I fumarate hydratase	C	Metabolism	1	0.00776759	C	3	pLUSID2	12874	NO	4
pBN	pPN_Library	under300	Virion structure and DNA packaging	Special vertex/DNA packaging	DNA packaging*	10	HBA75_06635	nrdE	class 1b ribonucleoside-diphosphate reductase subunit alpha	F	Metabolism	1	0.00247091	C	3	chromosome	40471	NO
pBC	pPC_Library	under300	Virion structure and DNA packaging	Special vertex/DNA packaging	DNA packaging*	10	HBA75_07455	hepT	heptaprenyl diphosphate synthase component II	H	Metabolism	4	0.0228571	C		chromosome	17500	NO
pBN	pPC_Library	under300	Virion structure and DNA packaging	Special vertex/DNA packaging	DNA packaging*	10	HBA75_07455	hepT	heptaprenyl diphosphate synthase component II	H	Metabolism	2	0.00602174	C		chromosome	33213	NO
pBC	pPN_Library	over300	Virion structure and DNA packaging	Special vertex/DNA packaging	DNA packaging*	10	HBA75_08205	flgE	flagellar hook protein FlgE	N	Cellular processes and signaling	1	0.0086103	C	2	chromosome	11614	C
pBC	pPN_Library	under300	Virion structure and DNA packaging	Special vertex/DNA packaging	DNA packaging*	10	HBA75_08205	flgE	flagellar hook protein FlgE	N	Cellular processes and signaling	8	0.00839155	C	2	chromosome	95334	C
pBC	pPC_Library	over300	Virion structure and DNA packaging	Special vertex/DNA packaging	DNA packaging*	10	HBA75_08260	fliM	flagellar motor switch protein FliM	N	Cellular processes and signaling	93	0.968548	B	2	chromosome	9602	B	9
pBC	pPC_Library	under300	Virion structure and DNA packaging	Special vertex/DNA packaging	DNA packaging*	10	HBA75_08260	fliM	flagellar motor switch protein FliM	N	Cellular processes and signaling	56	0.32	B	2	chromosome	17500	B	9
pBC	pPN_Library	over300	Virion structure and DNA packaging	Special vertex/DNA packaging	DNA packaging*	10	HBA75_08740	lysC	aspartate kinase	E	Metabolism	12	0.103324	C	2	chromosome	11614	C
pBC	pPN_Library	under300	Virion structure and DNA packaging	Special vertex/DNA packaging	DNA packaging*	10	HBA75_08740	lysC	aspartate kinase	E	Metabolism	27	0.0283215	C	2	chromosome	95334	C
pBC	pPN_Library	under300	Virion structure and DNA packaging	Special vertex/DNA packaging	DNA packaging*	10	HBA75_08775		hypothetical protein	NO		2	0.00209789	C		chromosome	95334	NO
pBC	pPC_Library	over300	Virion structure and DNA packaging	Special vertex/DNA packaging	DNA packaging*	10	HBA75_08815	hflX	GTPase HflX	S	Poorly characterized	1	0.0104145	C	3	chromosome	9602	C
pBN	pPN_Library	over300	Virion structure and DNA packaging	Special vertex/DNA packaging	DNA packaging*	10	HBA75_09375	ldh	L-lactate dehydrogenase	C	Metabolism	2	0.0155352	C	2	chromosome	12874	NO
pBC	pPC_Library	over300	Virion structure and DNA packaging	Special vertex/DNA packaging	DNA packaging*	10	HBA75_11325	prpD	2-methylcitrate dehydratase	S	Poorly characterized	32	0.333264	B	2	chromosome	9602	C	8
pBC	pPC_Library	under300	Virion structure and DNA packaging	Special vertex/DNA packaging	DNA packaging*	10	HBA75_11325	prpD	2-methylcitrate dehydratase	S	Poorly characterized	5	0.0285714	C	2	chromosome	17500	C	8
pBC	pPN_Library	over300	Virion structure and DNA packaging	Special vertex/DNA packaging	DNA packaging*	10	HBA75_11325	prpD	2-methylcitrate dehydratase	S	Poorly characterized	13	0.111934	C	2	chromosome	11614	C	8
pBC	pPN_Library	under300	Virion structure and DNA packaging	Special vertex/DNA packaging	DNA packaging*	10	HBA75_11325	prpD	2-methylcitrate dehydratase	S	Poorly characterized	27	0.0283215	C	2	chromosome	95334	C	8
pBN	pPN_Library	over300	Virion structure and DNA packaging	Special vertex/DNA packaging	DNA packaging*	10	HBA75_11325	prpD	2-methylcitrate dehydratase	S	Poorly characterized	1	0.00776759	C	2	chromosome	12874	NO	8
pBN	pPC_Library	over300	Virion structure and DNA packaging	Special vertex/DNA packaging	DNA packaging*	10	HBA75_11505	cysA	ABC transporter ATP-binding protein	V	Cellular processes and signaling	2	0.0194515	C	3	chromosome	10282	NO
pBC	pPN_Library	under300	Virion structure and DNA packaging	Special vertex/DNA packaging	DNA packaging*	10	HBA75_11505	cysA	ABC transporter ATP-binding protein	V	Cellular processes and signaling	2	0.00209789	C	2	chromosome	95334	NO
pBN	pPN_Library	over300	Virion structure and DNA packaging	Special vertex/DNA packaging	DNA packaging*	10	HBA75_11810	sigJ	sigma-70 family RNA polymerase sigma factor	K	Information storage and processing	1	0.00776759	C	2	chromosome	12874	NO
pBN	pPC_Library	over300	Virion structure and DNA packaging	Special vertex/DNA packaging	DNA packaging*	10	HBA75_12125		non-ribosomal peptide synthetase	Q	Metabolism	6	0.0583544	C	3	chromosome	10282	NO	8
pBN	pPC_Library	over300	Virion structure and DNA packaging	Special vertex/DNA packaging	DNA packaging*	10	HBA75_12130		amino acid adenylation domain-containing protein	Q	Metabolism	6	0.0583544	C	3	chromosome	10282	NO	8
pBN	pPN_Library	over300	Virion structure and DNA packaging	Special vertex/DNA packaging	DNA packaging*	10	HBA75_12255	rssA	patatin-like phospholipase family protein	S	Poorly characterized	2	0.0155352	C	2	chromosome	12874	NO
pBN	pPN_Library	over300	Virion structure and DNA packaging	Special vertex/DNA packaging	DNA packaging*	10	HBA75_13630	acoB	acetoin:2.6-dichlorophenolindophenol oxidoreductase subunit beta	C	Metabolism	2	0.0155352	C	3	chromosome	12874	NO
pBN	pPN_Library	over300	Virion structure and DNA packaging	Special vertex/DNA packaging	DNA packaging*	10	HBA75_13730		chitin-binding protein	S	Poorly characterized	1	0.00776759	C	3	chromosome	12874	NO
pBC	pPC_Library	over300	Virion structure and DNA packaging	Special vertex/DNA packaging	DNA packaging*	10	HBA75_14510	aroC	chorismate synthase	E	Metabolism	1	0.0104145	C	1	chromosome	9602	C
pBC	pPC_Library	over300	Virion structure and DNA packaging	Special vertex/DNA packaging	DNA packaging*	10	HBA75_14680	proB	glutamate 5-kinase	E	Metabolism	38	0.395751	B	1	chromosome	9602	C	15
pBC	pPC_Library	under300	Virion structure and DNA packaging	Special vertex/DNA packaging	DNA packaging*	10	HBA75_14680	proB	glutamate 5-kinase	E	Metabolism	42	0.24	C	1	chromosome	17500	C	15
pBC	pPN_Library	under300	Virion structure and DNA packaging	Special vertex/DNA packaging	DNA packaging*	10	HBA75_16495	luxA_2	LLM class oxidoreductase	C	Metabolism	2	0.00209789	C		chromosome	95334	NO
pBC	pPN_Library	under300	Virion structure and DNA packaging	Special vertex/DNA packaging	DNA packaging*	10	HBA75_17830	acnA	aconitate hydratase AcnA	C	Metabolism	1	0.00104894	C	2	chromosome	95334	NO
pBC	pPN_Library	under300	Virion structure and DNA packaging	Special vertex/DNA packaging	DNA packaging*	10	HBA75_18340	miaA	tRNA (adenosine(37)-N6)-dimethylallyltransferaseMiaA	J	Information storage and processing	2	0.00209789	C	1	chromosome	95334	NO
pBN	pPN_Library	over300	Virion structure and DNA packaging	Special vertex/DNA packaging	DNA packaging*	10	HBA75_18445	feuC	iron ABC transporter permease	P	Metabolism	1	0.00776759	C	2	chromosome	12874	NO
pBN	pPC_Library	over300	Virion structure and DNA packaging	Special vertex/DNA packaging	DNA packaging*	10	HBA75_18635	korA	2-oxoacid:acceptor oxidoreductase subunit alpha	C	Metabolism	1	0.00972573	C	2	chromosome	10282	NO
pBN	pPN_Library	over300	Virion structure and DNA packaging	Special vertex/DNA packaging	DNA packaging*	10	HBA75_18710	yufP	ABC transporter permease	S	Poorly characterized	4	0.0310704	C	2	chromosome	12874	NO
pBC	pPC_Library	over300	Virion structure and DNA packaging	Special vertex/DNA packaging	DNA packaging*	10	HBA75_18825	infB	translation initiation factor IF-2	J	Information storage and processing	380	3.95751	B	2	chromosome	9602	B	24
pBC	pPC_Library	under300	Virion structure and DNA packaging	Special vertex/DNA packaging	DNA packaging*	10	HBA75_18825	infB	translation initiation factor IF-2	J	Information storage and processing	152	0.868571	B	2	chromosome	17500	B	24
pBC	pPN_Library	over300	Virion structure and DNA packaging	Special vertex/DNA packaging	DNA packaging*	10	HBA75_18825	infB	translation initiation factor IF-2	J	Information storage and processing	609	5.24367	B	2	chromosome	11614	B	24
pBC	pPN_Library	under300	Virion structure and DNA packaging	Special vertex/DNA packaging	DNA packaging*	10	HBA75_18825	infB	translation initiation factor IF-2	J	Information storage and processing	621	0.651394	B	2	chromosome	95334	B	24
pBC	pPC_Library	over300	Virion structure and DNA packaging	Special vertex/DNA packaging	DNA packaging*	10	HBA75_18965	trmD	tRNA (guanosine(37)-N1)-methyltransferase TrmD	J	Information storage and processing	4	0.041658	C	3	chromosome	9602	C	10
pBC	pPN_Library	over300	Virion structure and DNA packaging	Special vertex/DNA packaging	DNA packaging*	10	HBA75_19180	pyrD	dihydroorotate oxidase B catalytic subunit	F	Metabolism	4	0.0344412	C	2	chromosome	11614	C
pBC	pPN_Library	under300	Virion structure and DNA packaging	Special vertex/DNA packaging	DNA packaging*	10	HBA75_19180	pyrD	dihydroorotate oxidase B catalytic subunit	F	Metabolism	24	0.0251746	C	2	chromosome	95334	C
pBN	pPN_Library	over300	Virion structure and DNA packaging	Special vertex/DNA packaging	DNA packaging*	10	HBA75_19210	pyrP	uracil permease	F	Metabolism	1	0.00776759	C	2	chromosome	12874	NO
pBC	pPN_Library	over300	Virion structure and DNA packaging	Special vertex/DNA packaging	DNA packaging*	10	HBA75_19290	ftsZ	cell division protein FtsZ	D	Cellular processes and signaling	6	0.0516618	C	2	chromosome	11614	B	24
pBC	pPN_Library	under300	Virion structure and DNA packaging	Special vertex/DNA packaging	DNA packaging*	10	HBA75_19290	ftsZ	cell division protein FtsZ	D	Cellular processes and signaling	28	0.0293704	C	2	chromosome	95334	B	24
pBN	pPN_Library	over300	Virion structure and DNA packaging	Special vertex/DNA packaging	DNA packaging*	10	HBA75_19290	ftsZ	cell division protein FtsZ	D	Cellular processes and signaling	228	1.77101	B	2	chromosome	12874	B	24
pBN	pPN_Library	under300	Virion structure and DNA packaging	Special vertex/DNA packaging	DNA packaging*	10	HBA75_19290	ftsZ	cell division protein FtsZ	D	Cellular processes and signaling	184	0.454647	B	2	chromosome	40471	B	24
pBC	pPC_Library	over300	Virion structure and DNA packaging	Special vertex/DNA packaging	DNA packaging*	10	HBA75_19295	ftsA	cell division protein FtsA	D	Cellular processes and signaling	2507	26.1091	A	3	chromosome	9602	A	31
pBC	pPC_Library	under300	Virion structure and DNA packaging	Special vertex/DNA packaging	DNA packaging*	10	HBA75_19295	ftsA	cell division protein FtsA	D	Cellular processes and signaling	19	0.108571	C	3	chromosome	17500	A	31
pBC	pPN_Library	over300	Virion structure and DNA packaging	Special vertex/DNA packaging	DNA packaging*	10	HBA75_19295	ftsA	cell division protein FtsA	D	Cellular processes and signaling	1768	15.223	A	3	chromosome	11614	B	31
pBC	pPN_Library	under300	Virion structure and DNA packaging	Special vertex/DNA packaging	DNA packaging*	10	HBA75_19295	ftsA	cell division protein FtsA	D	Cellular processes and signaling	357	0.374473	B	3	chromosome	95334	B	31
pBN	pPN_Library	over300	Virion structure and DNA packaging	Special vertex/DNA packaging	DNA packaging*	10	HBA75_19385	ylbM	nucleotidyltransferase	S	Poorly characterized	2	0.0155352	C	3	chromosome	12874	NO
pBN	pPN_Library	over300	Virion structure and DNA packaging	Special vertex/DNA packaging	DNA packaging*	10	HBA75_19395	ylbK	patatin family protein	S	Poorly characterized	1	0.00776759	C	3	chromosome	12874	NO
pBC	pPN_Library	under300	Virion structure and DNA packaging	Special vertex/DNA packaging	DNA packaging*	10	HBA75_20030	ptsI	phosphoenolpyruvate--protein phosphotransferase	G	Metabolism	2	0.00209789	C	2	chromosome	95334	NO
pBN	pPN_Library	over300	Virion structure and DNA packaging	Special vertex/DNA packaging	DNA packaging*	10	HBA75_20175	metP	sodium-dependent transporter	S	Poorly characterized	1	0.00776759	C	1	chromosome	12874	NO
pBC	pPN_Library	under300	Virion structure and DNA packaging	Special vertex/DNA packaging	DNA packaging*	10	HBA75_20370	ribE	riboflavin synthase subunit alpha	H	Metabolism	1	0.00104894	C	2	chromosome	95334	NO
pBC	pPN_Library	over300	Virion structure and DNA packaging	Special vertex/DNA packaging	DNA packaging*	10	HBA75_20390	bioB	biotin synthase	H	Metabolism	5	0.0430515	C	2	chromosome	11614	C
pBC	pPN_Library	under300	Virion structure and DNA packaging	Special vertex/DNA packaging	DNA packaging*	10	HBA75_20390	bioB	biotin synthase	H	Metabolism	9	0.00944049	C	2	chromosome	95334	C
pBN	pPN_Library	over300	Virion structure and DNA packaging	Special vertex/DNA packaging	DNA packaging*	10	HBA75_20500	sdaAA	L-serine ammonia-lyase. iron-sulfur-dependent. subunit alpha	E	Metabolism	2	0.0155352	C	3	chromosome	12874	NO
pBN	pPN_Library	over300	Virion structure and DNA packaging	Special vertex/DNA packaging	DNA packaging*	10	HBA75_20620	bfmBB	2-oxo acid dehydrogenase subunit E2	C	Metabolism	1	0.00776759	C	2	chromosome	12874	NO
pBN	pPN_Library	over300	Virion structure and DNA packaging	Special vertex/DNA packaging	DNA packaging*	10	HBA75_20725	dxs	1-deoxy-D-xylulose-5-phosphate synthase	H	Metabolism	1	0.00776759	C	1	chromosome	12874	NO
pBC	pPC_Library	under300	Virion structure and DNA packaging	Special vertex/DNA packaging	DNA packaging*	10	HBA75_20760	accC	acetyl-CoA carboxylase biotin carboxylase subunit	I	Metabolism	2	0.0114286	C	2	chromosome	17500	C
pBC	pPN_Library	under300	Virion structure and DNA packaging	Special vertex/DNA packaging	DNA packaging*	10	HBA75_20760	accC	acetyl-CoA carboxylase biotin carboxylase subunit	I	Metabolism	3	0.00314683	C	1	chromosome	95334	C
pBC	pPN_Library	under300	Virion structure and DNA packaging	Special vertex/DNA packaging	DNA packaging*	10	HBA75_31050	recA	recombinase RecA	L	Information storage and processing	21	0.0220278	C	2	pLUSID3	95334	B	4
pBC	pPN_Library	over300	Virion structure and DNA packaging	Special vertex/DNA packaging	DNA packaging*	10	HBA75_20835	yqhT	Xaa-Pro dipeptidase	E	Metabolism	148	1.27432	B	2	chromosome	11614	B	18
pBC	pPN_Library	under300	Virion structure and DNA packaging	Special vertex/DNA packaging	DNA packaging*	10	HBA75_20835	yqhT	Xaa-Pro dipeptidase	E	Metabolism	657	0.689156	B	2	chromosome	95334	B	18
pBC	pPN_Library	under300	Virion structure and DNA packaging	Special vertex/DNA packaging	DNA packaging*	10	HBA75_20985	gcvT	glycine cleavage system aminomethyltransferase GcvT	E	Metabolism	4	0.00419577	C	1	chromosome	95334	NO
pBC	pPC_Library	over300	Virion structure and DNA packaging	Special vertex/DNA packaging	DNA packaging*	10	HBA75_21125	metB	cystathionine gamma-synthase/O-acetylhomoserine thiolyase	E	Metabolism	13	0.135388	C	2	chromosome	9602	C	8
pBC	pPC_Library	under300	Virion structure and DNA packaging	Special vertex/DNA packaging	DNA packaging*	10	HBA75_21125	metB	cystathionine gamma-synthase/O-acetylhomoserine thiolyase	E	Metabolism	50	0.285714	B	2	chromosome	17500	C	8
pBN	pPN_Library	over300	Virion structure and DNA packaging	Special vertex/DNA packaging	DNA packaging*	10	HBA75_21125	metB	cystathionine gamma-synthase/O-acetylhomoserine thiolyase	E	Metabolism	3	0.0233028	C	2	chromosome	12874	NO	8
pBN	pPN_Library	under300	Virion structure and DNA packaging	Special vertex/DNA packaging	DNA packaging*	10	HBA75_21125	metB	cystathionine gamma-synthase/O-acetylhomoserine thiolyase	E	Metabolism	2	0.00494181	C	2	chromosome	40471	NO	8
pBC	pPC_Library	over300	Virion structure and DNA packaging	Special vertex/DNA packaging	DNA packaging*	10	HBA75_21275	nfo	deoxyribonuclease IV	L	Information storage and processing	8	0.083316	C	2	chromosome	9602	C
pBC	pPC_Library	under300	Virion structure and DNA packaging	Special vertex/DNA packaging	DNA packaging*	10	HBA75_21275	nfo	deoxyribonuclease IV	L	Information storage and processing	4	0.0228571	C	2	chromosome	17500	C
pBN	pPN_Library	over300	Virion structure and DNA packaging	Special vertex/DNA packaging	DNA packaging*	10	HBA75_21280	cshB	DEAD/DEAH box helicase	J	Information storage and processing	1	0.00776759	C	2	chromosome	12874	NO
pBC	pPC_Library	over300	Virion structure and DNA packaging	Special vertex/DNA packaging	DNA packaging*	10	HBA75_22945	ysdC	M42 family metallopeptidase	G	Metabolism	746	7.76921	B	3	chromosome	9602	A	34
pBC	pPC_Library	under300	Virion structure and DNA packaging	Special vertex/DNA packaging	DNA packaging*	10	HBA75_22945	ysdC	M42 family metallopeptidase	G	Metabolism	66	0.377143	B	3	chromosome	17500	A	34
pBC	pPN_Library	over300	Virion structure and DNA packaging	Special vertex/DNA packaging	DNA packaging*	10	HBA75_22945	ysdC	M42 family metallopeptidase	G	Metabolism	2709	23.3253	A	3	chromosome	11614	A	34
pBC	pPN_Library	under300	Virion structure and DNA packaging	Special vertex/DNA packaging	DNA packaging*	10	HBA75_22945	ysdC	M42 family metallopeptidase	G	Metabolism	1062	1.11398	B	3	chromosome	95334	A	34
pBN	pPN_Library	over300	Virion structure and DNA packaging	Special vertex/DNA packaging	DNA packaging*	10	HBA75_23000	dnaB	Replication initiation and membrane attachment protein	L	Information storage and processing	1	0.00776759	C	3	chromosome	12874	NO
pBC	pPC_Library	over300	Virion structure and DNA packaging	Special vertex/DNA packaging	DNA packaging*	10	HBA75_23085	pyk	pyruvate kinase	G	Metabolism	761	7.92543	B	3	chromosome	9602	B	26
pBC	pPC_Library	under300	Virion structure and DNA packaging	Special vertex/DNA packaging	DNA packaging*	10	HBA75_23085	pyk	pyruvate kinase	G	Metabolism	54	0.308571	B	3	chromosome	17500	B	26
pBC	pPN_Library	over300	Virion structure and DNA packaging	Special vertex/DNA packaging	DNA packaging*	10	HBA75_23085	pyk	pyruvate kinase	G	Metabolism	31	0.266919	B	3	chromosome	11614	C	26
pBC	pPN_Library	under300	Virion structure and DNA packaging	Special vertex/DNA packaging	DNA packaging*	10	HBA75_23085	pyk	pyruvate kinase	G	Metabolism	75	0.0786708	C	3	chromosome	95334	C	26
pBC	pPN_Library	under300	Virion structure and DNA packaging	Special vertex/DNA packaging	DNA packaging*	10	HBA75_23340	ezrA	septation ring formation regulator EzrA	D	Cellular processes and signaling	12	0.0125873	C	1	chromosome	95334	C
pBC	pPN_Library	under300	Virion structure and DNA packaging	Special vertex/DNA packaging	DNA packaging*	10	HBA75_23380	rpsD	30S ribosomal protein S4	J	Information storage and processing	1	0.00104894	C	2	chromosome	95334	NO
pBN	pPN_Library	over300	Virion structure and DNA packaging	Special vertex/DNA packaging	DNA packaging*	10	HBA75_23525	rimL	GNAT family N-acetyltransferase	J	Information storage and processing	2	0.0155352	C	3	chromosome	12874	NO
pBN	pPC_Library	over300	Virion structure and DNA packaging	Special vertex/DNA packaging	DNA packaging*	10	HBA75_23545		N-acetylmuramoyl-L-alanine amidase	M	Cellular processes and signaling	2	0.0194515	C	2	chromosome	10282	NO
pBC	pPC_Library	over300	Virion structure and DNA packaging	Special vertex/DNA packaging	DNA packaging*	10	HBA75_23625	pepV	dipeptidase PepV	E	Metabolism	338	3.5201	B	2	chromosome	9602	B	29
pBC	pPC_Library	under300	Virion structure and DNA packaging	Special vertex/DNA packaging	DNA packaging*	10	HBA75_23625	pepV	dipeptidase PepV	E	Metabolism	37	0.211429	C	2	chromosome	17500	B	29
pBC	pPN_Library	over300	Virion structure and DNA packaging	Special vertex/DNA packaging	DNA packaging*	10	HBA75_23625	pepV	dipeptidase PepV	E	Metabolism	97	0.835199	B	2	chromosome	11614	B	29
pBC	pPN_Library	under300	Virion structure and DNA packaging	Special vertex/DNA packaging	DNA packaging*	10	HBA75_23625	pepV	dipeptidase PepV	E	Metabolism	243	0.254893	B	2	chromosome	95334	B	29
pBC	pPN_Library	under300	Virion structure and DNA packaging	Special vertex/DNA packaging	DNA packaging*	10	HBA75_23645	ytfP	NAD(P)/FAD-dependent oxidoreductase	S	Poorly characterized	7	0.00734261	C	2	chromosome	95334	C
pBN	pPN_Library	over300	Virion structure and DNA packaging	Special vertex/DNA packaging	DNA packaging*	10	HBA75_23835		tyrosine-type recombinase/integrase	L	Information storage and processing	1	0.00776759	C	2	chromosome	12874	NO
pBC	pPN_Library	over300	Virion structure and DNA packaging	Special vertex/DNA packaging	DNA packaging*	10	HBA75_24320		alpha/beta hydrolase	S	Poorly characterized	3	0.0258309	C	1	chromosome	11614	NO
pBC	pPN_Library	under300	Virion structure and DNA packaging	Special vertex/DNA packaging	DNA packaging*	10	HBA75_24320		alpha/beta hydrolase	S	Poorly characterized	25	0.0262236	C	1	chromosome	95334	NO
pBC	pPC_Library	over300	Virion structure and DNA packaging	Special vertex/DNA packaging	DNA packaging*	10	HBA75_24840	yobU	AraC family transcriptional regulator	K	Information storage and processing	1	0.0104145	C	1	chromosome	9602	C
pBC	pPC_Library	under300	Virion structure and DNA packaging	Special vertex/DNA packaging	DNA packaging*	10	HBA75_24840	yobU	AraC family transcriptional regulator	K	Information storage and processing	2	0.0114286	C	1	chromosome	17500	C
pBC	pPC_Library	over300	Virion structure and DNA packaging	Special vertex/DNA packaging	DNA packaging*	10	HBA75_25400	sufB	Fe-S cluster assembly protein SufB	O	Cellular processes and signaling	52	0.541554	B	3	chromosome	9602	C	16
pBC	pPC_Library	under300	Virion structure and DNA packaging	Special vertex/DNA packaging	DNA packaging*	10	HBA75_25400	sufB	Fe-S cluster assembly protein SufB	O	Cellular processes and signaling	4	0.0228571	C	3	chromosome	17500	C	16
pBN	pPC_Library	over300	Virion structure and DNA packaging	Special vertex/DNA packaging	DNA packaging*	10	HBA75_25400	sufB	Fe-S cluster assembly protein SufB	O	Cellular processes and signaling	2	0.0194515	C	3	chromosome	10282	NO	16
pBC	pPN_Library	over300	Virion structure and DNA packaging	Special vertex/DNA packaging	DNA packaging*	10	HBA75_25400	sufB	Fe-S cluster assembly protein SufB	O	Cellular processes and signaling	5	0.0430515	C	3	chromosome	11614	NO	16
pBC	pPN_Library	under300	Virion structure and DNA packaging	Special vertex/DNA packaging	DNA packaging*	10	HBA75_25400	sufB	Fe-S cluster assembly protein SufB	O	Cellular processes and signaling	6	0.00629366	C	3	chromosome	95334	NO	16
pBN	pPN_Library	over300	Virion structure and DNA packaging	Special vertex/DNA packaging	DNA packaging*	10	HBA75_25795	nupC	pyrimidine nucleoside transporter NupC	F	Metabolism	1	0.00776759	C	3	chromosome	12874	NO
pBN	pPN_Library	over300	Virion structure and DNA packaging	Special vertex/DNA packaging	DNA packaging*	10	HBA75_25800	nupC	pyrimidine nucleoside transporter NupC	F	Metabolism	1	0.00776759	C	3	chromosome	12874	NO
pBN	pPN_Library	over300	Virion structure and DNA packaging	Special vertex/DNA packaging	DNA packaging*	10	HBA75_26010		hypothetical protein	S	Poorly characterized	1	0.00776759	C	1	chromosome	12874	NO
pBN	pPN_Library	over300	Virion structure and DNA packaging	Special vertex/DNA packaging	DNA packaging*	10	HBA75_26120		terminase large subunit	S	Poorly characterized	1	0.00776759	C	2	chromosome	12874	NO
pBN	pPN_Library	under300	Virion structure and DNA packaging	Special vertex/DNA packaging	DNA packaging*	10	HBA75_26120		terminase large subunit	S	Poorly characterized	1	0.00247091	C	2	chromosome	40471	NO
pBN	pPN_Library	under300	Virion structure and DNA packaging	Special vertex/DNA packaging	DNA packaging*	10	HBA75_26335	cggR	gapA transcriptional regulator CggR	K	Information storage and processing	1	0.00247091	C	3	chromosome	40471	NO	9
pBN	pPN_Library	over300	Virion structure and DNA packaging	Special vertex/DNA packaging	DNA packaging*	10	HBA75_26375		phage holin family protein	S	Poorly characterized	1	0.00776759	C	3	chromosome	12874	NO
pBC	pPN_Library	under300	Virion structure and DNA packaging	Special vertex/DNA packaging	DNA packaging*	10	HBA75_27455	ywqD	CpsD/CapB family tyrosine-protein kinase	D	Cellular processes and signaling	1	0.00104894	C	1	chromosome	95334	NO
pBN	pPC_Library	over300	Virion structure and DNA packaging	Special vertex/DNA packaging	DNA packaging*	10	HBA75_27605	atpA	F0F1 ATP synthase subunit alpha	C	Metabolism	17	0.165337	C	4	chromosome	10282	NO
pBC	pPN_Library	over300	Virion structure and DNA packaging	Special vertex/DNA packaging	DNA packaging*	10	HBA75_27605	atpA	F0F1 ATP synthase subunit alpha	C	Metabolism	5	0.0430515	C	4	chromosome	11614	NO
pBC	pPN_Library	under300	Virion structure and DNA packaging	Special vertex/DNA packaging	DNA packaging*	10	HBA75_27605	atpA	F0F1 ATP synthase subunit alpha	C	Metabolism	29	0.0304194	C	4	chromosome	95334	NO
pBN	pPN_Library	over300	Virion structure and DNA packaging	Special vertex/DNA packaging	DNA packaging*	10	HBA75_27660	rpiB	ribose 5-phosphate isomerase B	G	Metabolism	4	0.0310704	C	4	chromosome	12874	NO
pBN	pPN_Library	over300	Virion structure and DNA packaging	Special vertex/DNA packaging	DNA packaging*	10	HBA75_27910	speB	agmatinase	E	Metabolism	1	0.00776759	C	1	chromosome	12874	NO
pBN	pPN_Library	over300	Virion structure and DNA packaging	Special vertex/DNA packaging	DNA packaging*	10	HBA75_28465	rpsF	30S ribosomal protein S6	J	Information storage and processing	1	0.00776759	C	3	chromosome	12874	NO
pBN	pPN_Library	over300	Virion structure and DNA packaging	Special vertex/DNA packaging	DNA packaging*	10	HBA75_29725		hypothetical protein	NO		1	0.00776759	C	3	pLUSID1	12874	NO
pBN	pPN_Library	over300	Virion structure and DNA packaging	Special vertex/DNA packaging	DNA packaging*	10	HBA75_30285	mcpA	methyl-accepting chemotaxis protein	N	Cellular processes and signaling	1	0.00776759	C	3	pLUSID2	12874	NO
pBC	pPN_Library	over300	Virion structure and DNA packaging	Special vertex/DNA packaging	DNA packaging*	10	HBA75_30425	ahpF	alkyl hydroperoxide reductase subunit F	O	Cellular processes and signaling	215	1.85121	B	3	pLUSID2	11614	B	20
pBC	pPN_Library	under300	Virion structure and DNA packaging	Special vertex/DNA packaging	DNA packaging*	10	HBA75_30425	ahpF	alkyl hydroperoxide reductase subunit F	O	Cellular processes and signaling	321	0.336711	B	3	pLUSID2	95334	B	20
pBN	pPN_Library	over300	Virion structure and DNA packaging	Special vertex/DNA packaging	DNA packaging*	10	HBA75_30425	ahpF	alkyl hydroperoxide reductase subunit F	O	Cellular processes and signaling	1	0.00776759	C	3	pLUSID2	12874	C	20
pBC	pPC_Library	over300	Virion structure and DNA packaging	Special vertex/DNA packaging	DNA packaging*	10	HBA75_30450		dipeptide epimerase	M	Cellular processes and signaling	1542	16.0592	A	3	pLUSID2	9602	A	31
pBC	pPC_Library	under300	Virion structure and DNA packaging	Special vertex/DNA packaging	DNA packaging*	10	HBA75_30450		dipeptide epimerase	M	Cellular processes and signaling	309	1.76571	B	3	pLUSID2	17500	A	31
pBN	pPC_Library	over300	Virion structure and DNA packaging	Special vertex/DNA packaging	DNA packaging*	10	HBA75_30450		dipeptide epimerase	M	Cellular processes and signaling	5	0.0486287	C	3	pLUSID2	10282	A	31
pBC	pPN_Library	over300	Virion structure and DNA packaging	Special vertex/DNA packaging	DNA packaging*	10	HBA75_30450		dipeptide epimerase	M	Cellular processes and signaling	536	4.61512	B	3	pLUSID2	11614	B	31
pBC	pPN_Library	under300	Virion structure and DNA packaging	Special vertex/DNA packaging	DNA packaging*	10	HBA75_30450		dipeptide epimerase	M	Cellular processes and signaling	777	0.815029	B	3	pLUSID2	95334	B	31
pBN	pPC_Library	over300	Virion structure and DNA packaging	Special vertex/DNA packaging	DNA packaging*	10	HBA75_30635		IS110 family transposase	L	Information storage and processing	8	0.0778059	C	4	pLUSID2	10282	NO	9
pBN	pPC_Library	under300	Virion structure and DNA packaging	Special vertex/DNA packaging	DNA packaging*	10	HBA75_30635		IS110 family transposase	L	Information storage and processing	1	0.00301087	C	4	pLUSID2	33213	NO	9
pBN	pPN_Library	over300	Virion structure and DNA packaging	Special vertex/DNA packaging	DNA packaging*	10	HBA75_30635		IS110 family transposase	L	Information storage and processing	9	0.0699083	C	4	pLUSID2	12874	NO	9
pBN	pPN_Library	under300	Virion structure and DNA packaging	Special vertex/DNA packaging	DNA packaging*	10	HBA75_30635		IS110 family transposase	L	Information storage and processing	13	0.0321218	C	4	pLUSID2	40471	NO	9
pBN	pPN_Library	over300	Virion structure and DNA packaging	Special vertex/DNA packaging	DNA packaging*	10	HBA75_30690	yfkD	hypothetical protein	S	Poorly characterized	1	0.00776759	C	1	pLUSID2	12874	NO
pBC	pPC_Library	over300	Virion structure and DNA packaging	Special vertex/DNA packaging	DNA packaging*	10	HBA75_30720		IS4 family transposase	L	Information storage and processing	614	6.3945	B	3	pLUSID2	9602	B	29
pBC	pPC_Library	under300	Virion structure and DNA packaging	Special vertex/DNA packaging	DNA packaging*	10	HBA75_30720		IS4 family transposase	L	Information storage and processing	38	0.217143	C	3	pLUSID2	17500	B	29
pBC	pPN_Library	over300	Virion structure and DNA packaging	Special vertex/DNA packaging	DNA packaging*	10	HBA75_30720		IS4 family transposase	L	Information storage and processing	41	0.353022	B	3	pLUSID2	11614	B	29
pBC	pPN_Library	under300	Virion structure and DNA packaging	Special vertex/DNA packaging	DNA packaging*	10	HBA75_30720		IS4 family transposase	L	Information storage and processing	2648	2.7776	B	3	pLUSID2	95334	B	29
pBN	pPN_Library	over300	Virion structure and DNA packaging	Special vertex/DNA packaging	DNA packaging*	10	HBA75_30720		IS4 family transposase	L	Information storage and processing	1	0.00776759	C	3	pLUSID2	12874	NO	29
pBC	pPC_Library	under300	Virion structure and DNA packaging	Special vertex/DNA packaging	DNA packaging*	10	HBA75_31050	recA	recombinase RecA	L	Information storage and processing	1	0.00571429	C	1	pLUSID3	17500	NO	4
pBN	pPN_Library	over300	Virion structure and DNA packaging	Special vertex/DNA packaging	DNA packaging*	10	HBA75_31035		helix-turn-helix domain-containing protein	S	Poorly characterized	1	0.00776759	C	3	pLUSID3	12874	NO
pBC	pPC_Library	over300	Virion structure and DNA packaging	Capsid	Assembly protein*	11	HBA75_00745	fusA	elongation factor G	J	Information storage and processing	4	0.0252605	C	2	chromosome	15835	C	10
pBC	pPC_Library	under300	Virion structure and DNA packaging	Capsid	Assembly protein*	11	HBA75_00745	fusA	elongation factor G	J	Information storage and processing	1	0.00199422	C	2	chromosome	50145	C	10
pBN	pPC_Library	over300	Virion structure and DNA packaging	Capsid	Assembly protein*	11	HBA75_00745	fusA	elongation factor G	J	Information storage and processing	1	0.0179501	C	2	chromosome	5571	NO	10
pBC	pPC_Library	under300	Virion structure and DNA packaging	Capsid	Assembly protein*	11	HBA75_01115	XK27_11280	DUF3981 domain-containing protein	S	Poorly characterized	1	0.00199422	C		chromosome	50145	NO
pBC	pPC_Library	over300	Virion structure and DNA packaging	Capsid	Assembly protein*	11	HBA75_01455	alr	alanine racemase	E	Metabolism	521	3.29018	B	2	chromosome	15835	B	30
pBC	pPC_Library	under300	Virion structure and DNA packaging	Capsid	Assembly protein*	11	HBA75_01455	alr	alanine racemase	E	Metabolism	1370	2.73208	B	2	chromosome	50145	B	30
pBC	pPC_Library	over300	Virion structure and DNA packaging	Capsid	Assembly protein*	11	HBA75_03595	nrtA	ABC transporter substrate-binding protein	P	Metabolism	33	0.208399	C	3	chromosome	15835	A	31
pBN	pPC_Library	over300	Virion structure and DNA packaging	Capsid	Assembly protein*	11	HBA75_03595	nrtA	ABC transporter substrate-binding protein	P	Metabolism	1	0.0179501	C	3	chromosome	5571	A	31
pBC	pPC_Library	over300	Virion structure and DNA packaging	Capsid	Assembly protein*	11	HBA75_03795		DUF3238 domain-containing protein	S	Poorly characterized	33	0.208399	C	1	chromosome	15835	C	12
pBC	pPC_Library	under300	Virion structure and DNA packaging	Capsid	Assembly protein*	11	HBA75_03795		DUF3238 domain-containing protein	S	Poorly characterized	4	0.00797687	C	1	chromosome	50145	C	12
pBC	pPC_Library	under300	Virion structure and DNA packaging	Capsid	Assembly protein*	11	HBA75_04720		alpha/beta fold hydrolase	G	Metabolism	1	0.00199422	C	3	chromosome	50145	NO	11
pBN	pPC_Library	over300	Virion structure and DNA packaging	Capsid	Assembly protein*	11	HBA75_04720		alpha/beta fold hydrolase	G	Metabolism	11	0.197451	C	3	chromosome	5571	NO	11
pBC	pPC_Library	over300	Virion structure and DNA packaging	Capsid	Assembly protein*	11	HBA75_04790	dhaK	dihydroxyacetone kinase subunit DhaK	G	Metabolism	3	0.0189454	C	3	chromosome	15835	NO
pBC	pPC_Library	over300	Virion structure and DNA packaging	Capsid	Assembly protein*	11	HBA75_06105	putP	sodium/proline symporter PutP	E	Metabolism	1	0.00631512	C	4	chromosome	15835	NO	2
pBC	pPC_Library	over300	Virion structure and DNA packaging	Capsid	Assembly protein*	11	HBA75_11115	atoD	acetate CoA-transferase subunit alpha	I	Metabolism	1	0.00631512	C	2	chromosome	15835	C	1
pBC	pPC_Library	over300	Virion structure and DNA packaging	Capsid	Assembly protein*	11	HBA75_25140	dapF	diaminopimelate epimerase	E	Metabolism	1	0.00631512	C	1	chromosome	15835	C	1
pBC	pPC_Library	over300	Virion structure and DNA packaging	Capsid	Assembly protein*	11	HBA75_26415		phage tail protein	S	Poorly characterized	5	0.0315756	C	1	chromosome	15835	NO	2
pBC	pPC_Library	under300	Virion structure and DNA packaging	Capsid	Assembly protein*	11	HBA75_26415		phage tail protein	S	Poorly characterized	3	0.00598265	C	1	chromosome	50145	NO	2
pBC	pPC_Library	over300	Virion structure and DNA packaging	Capsid	Assembly protein*	11	HBA75_30510		phage tail family protein	S	Poorly characterized	1	0.00631512	C		pLUSID2	15835	C	6
pBN	pPC_Library	over300	Virion structure and DNA packaging	Capsid	Assembly protein*	11	HBA75_02235	pbpX	beta-lactamase family protein	V	Cellular processes and signaling	634	11.3804	A	3	chromosome	5571	NO	4
pBN	pPC_Library	over300	Virion structure and DNA packaging	Capsid	Assembly protein*	11	HBA75_30515	ebh	phage tail protein	S	Poorly characterized	4309	77.347	A	1	pLUSID2	5571	NO	2
pBC	pPC_Library	over300	Virion structure and DNA packaging	Capsid	Assembly protein*	11	HBA75_08260	fliM	flagellar motor switch protein FliM	N	Cellular processes and signaling	3	0.0189454	C	2	chromosome	15835	B	9
pBN	pPC_Library	over300	Virion structure and DNA packaging	Capsid	Assembly protein*	11	HBA75_08920	ilvD	dihydroxy-acid dehydratase	E	Metabolism	13	0.233351	C	2	chromosome	5571	NO
pBC	pPC_Library	over300	Virion structure and DNA packaging	Capsid	Assembly protein*	11	HBA75_09445	cydA	cytochrome ubiquinol oxidase subunit I	C	Metabolism	1	0.00631512	C	1	chromosome	15835	NO
pBC	pPC_Library	over300	Virion structure and DNA packaging	Capsid	Assembly protein*	11	HBA75_11325	prpD	2-methylcitrate dehydratase	S	Poorly characterized	2	0.0126302	C	2	chromosome	15835	C	8
pBC	pPC_Library	over300	Virion structure and DNA packaging	Capsid	Assembly protein*	11	HBA75_14680	proB	glutamate 5-kinase	E	Metabolism	1	0.00631512	C	1	chromosome	15835	C	15
pBC	pPC_Library	over300	Virion structure and DNA packaging	Capsid	Assembly protein*	11	HBA75_18825	infB	translation initiation factor IF-2	J	Information storage and processing	21	0.132618	C	2	chromosome	15835	B	24
pBC	pPN_Library	over300	Virion structure and DNA packaging	Capsid	Assembly protein*	11	HBA75_19290	ftsZ	cell division protein FtsZ	D	Cellular processes and signaling	1	0.00563666	C	2	chromosome	17741	B	24
pBC	pPC_Library	over300	Virion structure and DNA packaging	Capsid	Assembly protein*	11	HBA75_19295	ftsA	cell division protein FtsA	D	Cellular processes and signaling	133	0.839912	B	3	chromosome	15835	A	31
pBN	pPC_Library	over300	Virion structure and DNA packaging	Capsid	Assembly protein*	11	HBA75_19295	ftsA	cell division protein FtsA	D	Cellular processes and signaling	100	1.79501	B	3	chromosome	5571	C	31
pBC	pPC_Library	over300	Virion structure and DNA packaging	Capsid	Assembly protein*	11	HBA75_21125	metB	cystathionine gamma-synthase/O-acetylhomoserine thiolyase	E	Metabolism	1	0.00631512	C	2	chromosome	15835	C	8
pBC	pPC_Library	over300	Virion structure and DNA packaging	Capsid	Assembly protein*	11	HBA75_22945	ysdC	M42 family metallopeptidase	G	Metabolism	962	6.07515	B	3	chromosome	15835	A	34
pBC	pPC_Library	under300	Virion structure and DNA packaging	Capsid	Assembly protein*	11	HBA75_22945	ysdC	M42 family metallopeptidase	G	Metabolism	2	0.00398843	C	3	chromosome	50145	A	34
pBN	pPC_Library	over300	Virion structure and DNA packaging	Capsid	Assembly protein*	11	HBA75_22945	ysdC	M42 family metallopeptidase	G	Metabolism	21	0.376952	B	3	chromosome	5571	A	34
pBC	pPC_Library	over300	Virion structure and DNA packaging	Capsid	Assembly protein*	11	HBA75_23085	pyk	pyruvate kinase	G	Metabolism	11	0.0694664	C	3	chromosome	15835	B	26
pBN	pPC_Library	over300	Virion structure and DNA packaging	Capsid	Assembly protein*	11	HBA75_23085	pyk	pyruvate kinase	G	Metabolism	2	0.0359002	C	3	chromosome	5571	C	26
pBC	pPC_Library	over300	Virion structure and DNA packaging	Capsid	Assembly protein*	11	HBA75_23625	pepV	dipeptidase PepV	E	Metabolism	7	0.0442059	C	2	chromosome	15835	B	29
pBC	pPC_Library	under300	Virion structure and DNA packaging	Capsid	Assembly protein*	11	HBA75_23625	pepV	dipeptidase PepV	E	Metabolism	1	0.00199422	C	2	chromosome	50145	B	29
pBN	pPC_Library	over300	Virion structure and DNA packaging	Capsid	Assembly protein*	11	HBA75_25400	sufB	Fe-S cluster assembly protein SufB	O	Cellular processes and signaling	1	0.0179501	C	3	chromosome	5571	NO	16
pBN	pPC_Library	over300	Virion structure and DNA packaging	Capsid	Assembly protein*	11	HBA75_28595		hybrid non-ribosomal peptide synthetase/type I polyketide synthase	Q	Metabolism	3	0.0538503	C	2	pLUSID1	5571	NO
pBC	pPC_Library	over300	Virion structure and DNA packaging	Capsid	Assembly protein*	11	HBA75_30450		dipeptide epimerase	M	Cellular processes and signaling	135	0.852542	B	3	pLUSID2	15835	A	31
pBC	pPC_Library	under300	Virion structure and DNA packaging	Capsid	Assembly protein*	11	HBA75_30450		dipeptide epimerase	M	Cellular processes and signaling	2	0.00398843	C	3	pLUSID2	50145	A	31
pBN	pPC_Library	over300	Virion structure and DNA packaging	Capsid	Assembly protein*	11	HBA75_30450		dipeptide epimerase	M	Cellular processes and signaling	46	0.825705	B	3	pLUSID2	5571	A	31
pBC	pPC_Library	over300	Virion structure and DNA packaging	Capsid	Assembly protein*	11	HBA75_30555	clpP	Clp protease ClpP	O	Cellular processes and signaling	1	0.00631512	C		pLUSID2	15835	NO
pBC	pPC_Library	over300	Virion structure and DNA packaging	Capsid	Assembly protein*	11	HBA75_30635		IS110 family transposase	L	Information storage and processing	1	0.00631512	C	4	pLUSID2	15835	NO	9
pBC	pPC_Library	over300	Virion structure and DNA packaging	Capsid	Assembly protein*	11	HBA75_30720		IS4 family transposase	L	Information storage and processing	37	0.23366	C	3	pLUSID2	15835	B	29
pBC	pPC_Library	over300	Virion structure and DNA packaging	Unknown	Unknown	12	HBA75_01455	alr	alanine racemase	E	Metabolism	3411	29.1538	A	2	chromosome	11700	B	30
pBN	pPC_Library	over300	Virion structure and DNA packaging	Unknown	Unknown	12	HBA75_01455	alr	alanine racemase	E	Metabolism	14	0.159854	C	2	chromosome	8758	B	30
pBN	pPC_Library	under300	Virion structure and DNA packaging	Unknown	Unknown	12	HBA75_01455	alr	alanine racemase	E	Metabolism	188	1.16337	B	2	chromosome	16160	B	30
pBN	pPC_Library	over300	Virion structure and DNA packaging	Unknown	Unknown	12	HBA75_02890	aspA	aspartate ammonia-lyase	E	Metabolism	1	0.0114181	C	3	chromosome	8758	C	10
pBC	pPC_Library	over300	Virion structure and DNA packaging	Unknown	Unknown	12	HBA75_03595	nrtA	ABC transporter substrate-binding protein	P	Metabolism	263	2.24786	B	3	chromosome	11700	A	31
pBN	pPC_Library	over300	Virion structure and DNA packaging	Unknown	Unknown	12	HBA75_03595	nrtA	ABC transporter substrate-binding protein	P	Metabolism	10	0.114181	C	3	chromosome	8758	A	31
pBN	pPC_Library	under300	Virion structure and DNA packaging	Unknown	Unknown	12	HBA75_03595	nrtA	ABC transporter substrate-binding protein	P	Metabolism	2	0.0123762	C	3	chromosome	16160	A	31
pBC	pPN_Library	over300	Virion structure and DNA packaging	Unknown	Unknown	12	HBA75_03615	thiG	thiazole synthase	H	Metabolism	7185	55.9623	A	2	chromosome	12839	A	25
pBN	pPN_Library	over300	Virion structure and DNA packaging	Unknown	Unknown	12	HBA75_03615	thiG	thiazole synthase	H	Metabolism	4	0.0356347	C	2	chromosome	11225	A	25
pBC	pPC_Library	over300	Virion structure and DNA packaging	Unknown	Unknown	12	HBA75_03795		DUF3238 domain-containing protein	S	Poorly characterized	2	0.017094	C	1	chromosome	11700	C	12
pBN	pPC_Library	over300	Virion structure and DNA packaging	Unknown	Unknown	12	HBA75_04365		methyltransferase	L	Information storage and processing	1	0.0114181	C	3	chromosome	8758	NO	11
pBN	pPC_Library	over300	Virion structure and DNA packaging	Unknown	Unknown	12	HBA75_04720		alpha/beta fold hydrolase	G	Metabolism	7026	80.2238	A	3	chromosome	8758	NO	11
pBN	pPC_Library	under300	Virion structure and DNA packaging	Unknown	Unknown	12	HBA75_04720		alpha/beta fold hydrolase	G	Metabolism	24	0.148515	C	3	chromosome	16160	NO	11
pBC	pPC_Library	over300	Virion structure and DNA packaging	Unknown	Unknown	12	HBA75_11115	atoD	acetate CoA-transferase subunit alpha	I	Metabolism	6	0.0512821	C	2	chromosome	11700	C	1
pBC	pPC_Library	over300	Virion structure and DNA packaging	Unknown	Unknown	12	HBA75_27930	GDPD	glycerophosphodiester phosphodiesterase	C	Metabolism	1	0.00854701	C	1	chromosome	11700	B	6
pBN	pPC_Library	over300	Virion structure and DNA packaging	Unknown	Unknown	12	HBA75_25140	dapF	diaminopimelate epimerase	E	Metabolism	1	0.0114181	C	1	chromosome	8758	NO	1
pBN	pPC_Library	under300	Virion structure and DNA packaging	Unknown	Unknown	12	HBA75_25140	dapF	diaminopimelate epimerase	E	Metabolism	1	0.00618812	C	1	chromosome	16160	NO	1
pBN	pPC_Library	under300	Virion structure and DNA packaging	Unknown	Unknown	12	HBA75_26415		phage tail protein	S	Poorly characterized	1	0.00618812	C	1	chromosome	16160	NO	2
pBN	pPC_Library	over300	Virion structure and DNA packaging	Unknown	Unknown	12	HBA75_27930	GDPD	glycerophosphodiester phosphodiesterase	C	Metabolism	1	0.0114181	C	1	chromosome	8758	C	6
pBC	pPC_Library	over300	Virion structure and DNA packaging	Unknown	Unknown	12	HBA75_08260	fliM	flagellar motor switch protein FliM	N	Cellular processes and signaling	4	0.034188	C	2	chromosome	11700	B	9
pBN	pPC_Library	over300	Virion structure and DNA packaging	Unknown	Unknown	12	HBA75_30515	ebh	phage tail protein	S	Poorly characterized	2	0.0228363	C	1	pLUSID2	8758	NO	2
pBC	pPN_Library	over300	Virion structure and DNA packaging	Unknown	Unknown	12	HBA75_25845	yjlC	DUF1641 domain-containing protein	S	Poorly characterized	63	0.490692	B	3	chromosome	12839	C	2
pBC	pPC_Library	over300	Virion structure and DNA packaging	Unknown	Unknown	12	HBA75_11325	prpD	2-methylcitrate dehydratase	S	Poorly characterized	28	0.239316	C	2	chromosome	11700	C	8
pBN	pPC_Library	over300	Virion structure and DNA packaging	Unknown	Unknown	12	HBA75_14680	proB	glutamate 5-kinase	E	Metabolism	1	0.0114181	C	1	chromosome	8758	B	15
pBN	pPC_Library	over300	Virion structure and DNA packaging	Unknown	Unknown	12	HBA75_15655		beta-lactamase family protein	V	Cellular processes and signaling	26	0.296871	B	2	chromosome	8758	NO	8
pBC	pPC_Library	over300	Virion structure and DNA packaging	Unknown	Unknown	12	HBA75_18825	infB	translation initiation factor IF-2	J	Information storage and processing	9	0.0769231	C	2	chromosome	11700	B	24
pBN	pPC_Library	over300	Virion structure and DNA packaging	Unknown	Unknown	12	HBA75_18825	infB	translation initiation factor IF-2	J	Information storage and processing	10	0.114181	C	2	chromosome	8758	C	24
pBC	pPN_Library	over300	Virion structure and DNA packaging	Unknown	Unknown	12	HBA75_18825	infB	translation initiation factor IF-2	J	Information storage and processing	5	0.0389438	C	2	chromosome	12839	B	24
pBN	pPN_Library	over300	Virion structure and DNA packaging	Unknown	Unknown	12	HBA75_18825	infB	translation initiation factor IF-2	J	Information storage and processing	1	0.00890869	C	2	chromosome	11225	NO	24
pBN	pPC_Library	over300	Virion structure and DNA packaging	Unknown	Unknown	12	HBA75_18965	trmD	tRNA (guanosine(37)-N1)-methyltransferase TrmD	J	Information storage and processing	1	0.0114181	C	3	chromosome	8758	NO	10
pBC	pPN_Library	over300	Virion structure and DNA packaging	Unknown	Unknown	12	HBA75_19290	ftsZ	cell division protein FtsZ	D	Cellular processes and signaling	2	0.0155775	C	2	chromosome	12839	B	24
pBC	pPC_Library	over300	Virion structure and DNA packaging	Unknown	Unknown	12	HBA75_19295	ftsA	cell division protein FtsA	D	Cellular processes and signaling	1818	15.5385	A	3	chromosome	11700	A	31
pBN	pPC_Library	over300	Virion structure and DNA packaging	Unknown	Unknown	12	HBA75_19295	ftsA	cell division protein FtsA	D	Cellular processes and signaling	26	0.296871	B	3	chromosome	8758	C	31
pBC	pPN_Library	over300	Virion structure and DNA packaging	Unknown	Unknown	12	HBA75_19295	ftsA	cell division protein FtsA	D	Cellular processes and signaling	23	0.179142	C	3	chromosome	12839	B	31
pBC	pPN_Library	over300	Virion structure and DNA packaging	Unknown	Unknown	12	HBA75_20835	yqhT	Xaa-Pro dipeptidase	E	Metabolism	10	0.0778877	C	2	chromosome	12839	B	18
pBN	pPC_Library	over300	Virion structure and DNA packaging	Unknown	Unknown	12	HBA75_21125	metB	cystathionine gamma-synthase/O-acetylhomoserine thiolyase	E	Metabolism	2	0.0228363	C	2	chromosome	8758	NO	8
pBN	pPC_Library	under300	Virion structure and DNA packaging	Unknown	Unknown	12	HBA75_21125	metB	cystathionine gamma-synthase/O-acetylhomoserine thiolyase	E	Metabolism	1	0.00618812	C	2	chromosome	16160	NO	8
pBC	pPC_Library	over300	Virion structure and DNA packaging	Unknown	Unknown	12	HBA75_21275	nfo	deoxyribonuclease IV	L	Information storage and processing	4	0.034188	C	2	chromosome	11700	C
pBC	pPC_Library	over300	Virion structure and DNA packaging	Unknown	Unknown	12	HBA75_22945	ysdC	M42 family metallopeptidase	G	Metabolism	1371	11.7179	A	3	chromosome	11700	A	34
pBN	pPC_Library	over300	Virion structure and DNA packaging	Unknown	Unknown	12	HBA75_22945	ysdC	M42 family metallopeptidase	G	Metabolism	41	0.468143	B	3	chromosome	8758	A	34
pBC	pPN_Library	over300	Virion structure and DNA packaging	Unknown	Unknown	12	HBA75_22945	ysdC	M42 family metallopeptidase	G	Metabolism	2408	18.7554	A	3	chromosome	12839	A	34
pBN	pPN_Library	over300	Virion structure and DNA packaging	Unknown	Unknown	12	HBA75_22945	ysdC	M42 family metallopeptidase	G	Metabolism	1	0.00890869	C	3	chromosome	11225	B	34
pBC	pPC_Library	over300	Virion structure and DNA packaging	Unknown	Unknown	12	HBA75_23085	pyk	pyruvate kinase	G	Metabolism	190	1.62393	B	3	chromosome	11700	B	26
pBN	pPC_Library	over300	Virion structure and DNA packaging	Unknown	Unknown	12	HBA75_23085	pyk	pyruvate kinase	G	Metabolism	5	0.0570907	C	3	chromosome	8758	C	26
pBC	pPC_Library	over300	Virion structure and DNA packaging	Unknown	Unknown	12	HBA75_23625	pepV	dipeptidase PepV	E	Metabolism	220	1.88034	B	2	chromosome	11700	B	29
pBC	pPN_Library	over300	Virion structure and DNA packaging	Unknown	Unknown	12	HBA75_23625	pepV	dipeptidase PepV	E	Metabolism	8	0.0623101	C	2	chromosome	12839	B	29
pBN	pPC_Library	over300	Virion structure and DNA packaging	Unknown	Unknown	12	HBA75_25400	sufB	Fe-S cluster assembly protein SufB	O	Cellular processes and signaling	1	0.0114181	C	3	chromosome	8758	NO	16
pBC	pPN_Library	over300	Virion structure and DNA packaging	Unknown	Unknown	12	HBA75_30425	ahpF	alkyl hydroperoxide reductase subunit F	O	Cellular processes and signaling	70	0.545214	B	3	pLUSID2	12839	B	20
pBC	pPC_Library	over300	Virion structure and DNA packaging	Unknown	Unknown	12	HBA75_30450		dipeptide epimerase	M	Cellular processes and signaling	2552	21.812	A	3	pLUSID2	11700	A	31
pBN	pPC_Library	over300	Virion structure and DNA packaging	Unknown	Unknown	12	HBA75_30450		dipeptide epimerase	M	Cellular processes and signaling	132	1.50719	B	3	pLUSID2	8758	A	31
pBN	pPC_Library	under300	Virion structure and DNA packaging	Unknown	Unknown	12	HBA75_30450		dipeptide epimerase	M	Cellular processes and signaling	2	0.0123762	C	3	pLUSID2	16160	A	31
pBC	pPN_Library	over300	Virion structure and DNA packaging	Unknown	Unknown	12	HBA75_30450		dipeptide epimerase	M	Cellular processes and signaling	4	0.0311551	C	3	pLUSID2	12839	B	31
pBN	pPN_Library	over300	Virion structure and DNA packaging	Unknown	Unknown	12	HBA75_30450		dipeptide epimerase	M	Cellular processes and signaling	1	0.00890869	C	3	pLUSID2	11225	NO	31
pBN	pPC_Library	over300	Virion structure and DNA packaging	Unknown	Unknown	12	HBA75_30685	yfkA	radical SAM/CxCxxxxC motif protein YfkAB	S	Poorly characterized	1	0.0114181	C	3	pLUSID2	8758	NO	7
pBC	pPC_Library	over300	Virion structure and DNA packaging	Unknown	Unknown	12	HBA75_30720		IS4 family transposase	L	Information storage and processing	1023	8.74359	B	3	pLUSID2	11700	B	29
pBC	pPN_Library	over300	Virion structure and DNA packaging	Unknown	Unknown	12	HBA75_30720		IS4 family transposase	L	Information storage and processing	36	0.280396	B	3	pLUSID2	12839	B	29
pBC	pPN_Library	over300	Virion structure and DNA packaging	Unknown	Unknown	13	HBA75_00740	rpsG	30S ribosomal protein S7	J	Information storage and processing	1	0.00693818	C	2	chromosome	14413	NO
pBN	pPC_Library	over300	Virion structure and DNA packaging	Unknown	Unknown	13	HBA75_00745	fusA	elongation factor G	J	Information storage and processing	4	0.0428403	C	2	chromosome	9337	NO	10
pBC	pPC_Library	over300	Virion structure and DNA packaging	Unknown	Unknown	13	HBA75_01455	alr	alanine racemase	E	Metabolism	443	5.13028	B	2	chromosome	8635	B	30
pBN	pPC_Library	over300	Virion structure and DNA packaging	Unknown	Unknown	13	HBA75_01455	alr	alanine racemase	E	Metabolism	595	6.3725	B	2	chromosome	9337	B	30
pBN	pPC_Library	over300	Virion structure and DNA packaging	Unknown	Unknown	13	HBA75_01850	purB	adenylosuccinate lyase	F	Metabolism	3	0.0321302	C	1	chromosome	9337	NO
pBN	pPC_Library	over300	Virion structure and DNA packaging	Unknown	Unknown	13	HBA75_02620	citH	CitMHS family transporter	C	Metabolism	1	0.0107101	C	3	chromosome	9337	NO	10
pBN	pPC_Library	over300	Virion structure and DNA packaging	Unknown	Unknown	13	HBA75_02890	aspA	aspartate ammonia-lyase	E	Metabolism	57	0.610474	B	3	chromosome	9337	C	10
pBC	pPC_Library	over300	Virion structure and DNA packaging	Unknown	Unknown	13	HBA75_03595	nrtA	ABC transporter substrate-binding protein	P	Metabolism	352	4.07643	B	3	chromosome	8635	A	31
pBN	pPC_Library	over300	Virion structure and DNA packaging	Unknown	Unknown	13	HBA75_03595	nrtA	ABC transporter substrate-binding protein	P	Metabolism	134	1.43515	B	3	chromosome	9337	A	31
pBC	pPN_Library	over300	Virion structure and DNA packaging	Unknown	Unknown	13	HBA75_03615	thiG	thiazole synthase	H	Metabolism	4860	33.7196	A	2	chromosome	14413	A	25
pBC	pPC_Library	over300	Virion structure and DNA packaging	Unknown	Unknown	13	HBA75_03795		DUF3238 domain-containing protein	S	Poorly characterized	3	0.0347423	C	1	chromosome	8635	C	12
pBC	pPN_Library	over300	Virion structure and DNA packaging	Unknown	Unknown	13	HBA75_03795		DUF3238 domain-containing protein	S	Poorly characterized	26	0.180393	C	2	chromosome	14413	C	12
pBN	pPC_Library	over300	Virion structure and DNA packaging	Unknown	Unknown	13	HBA75_03905		DUF871 domain-containing protein	S	Poorly characterized	4	0.0428403	C	2	chromosome	9337	NO
pBN	pPC_Library	over300	Virion structure and DNA packaging	Unknown	Unknown	13	HBA75_04365		methyltransferase	L	Information storage and processing	436	4.66959	B	3	chromosome	9337	NO	11
pBN	pPC_Library	over300	Virion structure and DNA packaging	Unknown	Unknown	13	HBA75_04720		alpha/beta fold hydrolase	G	Metabolism	8	0.0856806	C	3	chromosome	9337	NO	11
pBN	pPC_Library	over300	Virion structure and DNA packaging	Unknown	Unknown	13	HBA75_05095	oxdD	oxalate decarboxylase family bicupin	G	Metabolism	29	0.310592	B	3	chromosome	9337	NO	7
pBN	pPC_Library	over300	Virion structure and DNA packaging	Unknown	Unknown	13	HBA75_06635	nrdE	class 1b ribonucleoside-diphosphate reductase subunit alpha	F	Metabolism	2	0.0214202	C	2	chromosome	9337	NO
pBC	pPC_Library	over300	Virion structure and DNA packaging	Unknown	Unknown	13	HBA75_08260	fliM	flagellar motor switch protein FliM	N	Cellular processes and signaling	8	0.0926462	C	2	chromosome	8635	B	9
pBN	pPC_Library	over300	Virion structure and DNA packaging	Unknown	Unknown	13	HBA75_08260	fliM	flagellar motor switch protein FliM	N	Cellular processes and signaling	101	1.08172	B	2	chromosome	9337	NO	9
pBC	pPC_Library	over300	Virion structure and DNA packaging	Unknown	Unknown	13	HBA75_11115	atoD	acetate CoA-transferase subunit alpha	I	Metabolism	12	0.138969	C	2	chromosome	8635	C	1
pBC	pPC_Library	over300	Virion structure and DNA packaging	Unknown	Unknown	13	HBA75_27930	GDPD	glycerophosphodiester phosphodiesterase	C	Metabolism	52	0.6022	B	1	chromosome	8635	B	6
pBN	pPC_Library	over300	Virion structure and DNA packaging	Unknown	Unknown	13	HBA75_23575	pepA	M42 family metallopeptidase	G	Metabolism	21	0.224912	C	1	chromosome	9337	NO	3
pBN	pPC_Library	over300	Virion structure and DNA packaging	Unknown	Unknown	13	HBA75_01145	oppD	ABC transporter ATP-binding protein	P	Metabolism	35	0.374853	B	2	chromosome	9337	NO	2
pBN	pPC_Library	over300	Virion structure and DNA packaging	Unknown	Unknown	13	HBA75_01870	purL	phosphoribosylformylglycinamidine synthase II	F	Metabolism	5	0.0535504	C	2	chromosome	9337	NO	5
pBN	pPC_Library	over300	Virion structure and DNA packaging	Unknown	Unknown	13	HBA75_03605	thiO	glycine oxidase ThiO	E	Metabolism	107	1.14598	B	1	chromosome	9337	NO	3
pBN	pPC_Library	over300	Virion structure and DNA packaging	Unknown	Unknown	13	HBA75_05625	addA	helicase-exonuclease AddAB subunit AddA	L	Information storage and processing	16	0.171361	C	1	chromosome	9337	NO	1
pBN	pPC_Library	over300	Virion structure and DNA packaging	Unknown	Unknown	13	HBA75_08385	phnT	ABC transporter ATP-binding protein	P	Metabolism	68	0.728285	B	2	chromosome	9337	NO	6
pBN	pPC_Library	over300	Virion structure and DNA packaging	Unknown	Unknown	13	HBA75_11115	atoD	acetate CoA-transferase subunit alpha	I	Metabolism	6	0.0642605	C	2	chromosome	9337	NO	1
pBN	pPC_Library	over300	Virion structure and DNA packaging	Unknown	Unknown	13	HBA75_12120		non-ribosomal peptide synthetase	Q	Metabolism	114	1.22095	B	3	chromosome	9337	NO	4
pBN	pPC_Library	over300	Virion structure and DNA packaging	Unknown	Unknown	13	HBA75_15635		AAA family ATPase	L	Information storage and processing	60	0.642605	B	2	chromosome	9337	NO	1
pBN	pPC_Library	over300	Virion structure and DNA packaging	Unknown	Unknown	13	HBA75_19495	pyc	pyruvate carboxylase	C	Metabolism	24	0.257042	B	1	chromosome	9337	NO	1
pBN	pPC_Library	over300	Virion structure and DNA packaging	Unknown	Unknown	13	HBA75_22900	pheS	phenylalanine--tRNA ligase subunit alpha	J	Information storage and processing	4	0.0428403	C	1	chromosome	9337	NO	2
pBN	pPC_Library	over300	Virion structure and DNA packaging	Unknown	Unknown	13	HBA75_24805	pepA	cytosol aminopeptidase	E	Metabolism	494	5.29078	B	3	chromosome	9337	NO	6
pBN	pPC_Library	over300	Virion structure and DNA packaging	Unknown	Unknown	13	HBA75_25540	fadM	proline dehydrogenase	E	Metabolism	41	0.439113	B	2	chromosome	9337	NO	1
pBN	pPC_Library	over300	Virion structure and DNA packaging	Unknown	Unknown	13	HBA75_25855	tyrS	tyrosine--tRNA ligase	J	Information storage and processing	1	0.0107101	C	2	chromosome	9337	NO	1
pBC	pPN_Library	over300	Virion structure and DNA packaging	Unknown	Unknown	13	HBA75_00835	rplF	50S ribosomal protein L6	J	Information storage and processing	1	0.00693818	C	2	chromosome	14413	B	1
pBC	pPN_Library	over300	Virion structure and DNA packaging	Unknown	Unknown	13	HBA75_12045	pepD	beta-Ala-His dipeptidase	E	Metabolism	1	0.00693818	C	2	chromosome	14413	C	4
pBC	pPN_Library	over300	Virion structure and DNA packaging	Unknown	Unknown	13	HBA75_19390	ylbL	PDZ domain-containing protein	T	Cellular processes and signaling	29	0.201207	C	1	chromosome	14413	C	1
pBC	pPN_Library	over300	Virion structure and DNA packaging	Unknown	Unknown	13	HBA75_22900	pheS	phenylalanine--tRNA ligase subunit alpha	J	Information storage and processing	1	0.00693818	C	1	chromosome	14413	C	2
pBC	pPN_Library	over300	Virion structure and DNA packaging	Unknown	Unknown	13	HBA75_25320	glpX	class II fructose-bisphosphatase	G	Metabolism	1	0.00693818	C	2	chromosome	14413	B	1
pBC	pPN_Library	over300	Virion structure and DNA packaging	Unknown	Unknown	13	HBA75_25845	yjlC	DUF1641 domain-containing protein	S	Poorly characterized	1	0.00693818	C	3	chromosome	14413	C	2
pBC	pPN_Library	over300	Virion structure and DNA packaging	Unknown	Unknown	13	HBA75_26060		endopeptidase	M	Cellular processes and signaling	1	0.00693818	C	4	chromosome	14413	NO	1
pBC	pPN_Library	over300	Virion structure and DNA packaging	Unknown	Unknown	13	HBA75_27930	GDPD	glycerophosphodiester phosphodiesterase	C	Metabolism	1	0.00693818	C	2	chromosome	14413	NO	6
pBC	pPN_Library	over300	Virion structure and DNA packaging	Unknown	Unknown	13	HBA75_28175	yadS	trimeric intracellular cation channel family protein	S	Poorly characterized	1	0.00693818	C	2	chromosome	14413	NO	5
pBN	pPC_Library	over300	Virion structure and DNA packaging	Unknown	Unknown	13	HBA75_08815	hflX	GTPase HflX	S	Poorly characterized	5	0.0535504	C	3	chromosome	9337	NO
pBC	pPN_Library	over300	Virion structure and DNA packaging	Unknown	Unknown	13	HBA75_30675	fumB	class I fumarate hydratase	C	Metabolism	2	0.0138764	C	3	pLUSID2	14413	NO	4
pBN	pPN_Library	over300	Virion structure and DNA packaging	Unknown	Unknown	13	HBA75_26700		hypothetical protein	NO		780	9.67742	B		chromosome	8060	NO	1
pBN	pPN_Library	over300	Virion structure and DNA packaging	Unknown	Unknown	13	HBA75_30470	dus	tRNA-dihydrouridine synthase	J	Information storage and processing	6770	83.995	A	2	pLUSID2	8060	NO	1
pBC	pPC_Library	over300	Virion structure and DNA packaging	Unknown	Unknown	13	HBA75_11325	prpD	2-methylcitrate dehydratase	S	Poorly characterized	2	0.0231616	C	2	chromosome	8635	C	8
pBN	pPC_Library	over300	Virion structure and DNA packaging	Unknown	Unknown	13	HBA75_11325	prpD	2-methylcitrate dehydratase	S	Poorly characterized	14	0.149941	C	2	chromosome	9337	NO	8
pBN	pPC_Library	over300	Virion structure and DNA packaging	Unknown	Unknown	13	HBA75_11425	entB	isochorismatase family protein	Q	Metabolism	18	0.192781	C		chromosome	9337	NO
pBN	pPC_Library	over300	Virion structure and DNA packaging	Unknown	Unknown	13	HBA75_11430	dhbF	amino acid adenylation domain-containing protein	Q	Metabolism	3	0.0321302	C	1	chromosome	9337	NO
pBN	pPC_Library	over300	Virion structure and DNA packaging	Unknown	Unknown	13	HBA75_12125		non-ribosomal peptide synthetase	Q	Metabolism	475	5.08729	B	3	chromosome	9337	NO	8
pBN	pPC_Library	over300	Virion structure and DNA packaging	Unknown	Unknown	13	HBA75_12130		amino acid adenylation domain-containing protein	Q	Metabolism	476	5.098	B	3	chromosome	9337	NO	8
pBN	pPC_Library	over300	Virion structure and DNA packaging	Unknown	Unknown	13	HBA75_14510	aroC	chorismate synthase	E	Metabolism	1	0.0107101	C	1	chromosome	9337	NO
pBC	pPC_Library	over300	Virion structure and DNA packaging	Unknown	Unknown	13	HBA75_14680	proB	glutamate 5-kinase	E	Metabolism	4	0.0463231	C	1	chromosome	8635	C	15
pBN	pPC_Library	over300	Virion structure and DNA packaging	Unknown	Unknown	13	HBA75_14680	proB	glutamate 5-kinase	E	Metabolism	1	0.0107101	C	1	chromosome	9337	B	15
pBN	pPC_Library	over300	Virion structure and DNA packaging	Unknown	Unknown	13	HBA75_15005	otrA	TetM/TetW/TetO/TetS family tetracycline resistance ribosomal protection protein	J	Information storage and processing	5	0.0535504	C	1	chromosome	9337	NO
pBN	pPC_Library	over300	Virion structure and DNA packaging	Unknown	Unknown	13	HBA75_15340	pps	phosphoenolpyruvate synthase	G	Metabolism	1	0.0107101	C	3	chromosome	9337	NO
pBN	pPC_Library	over300	Virion structure and DNA packaging	Unknown	Unknown	13	HBA75_15655		beta-lactamase family protein	V	Cellular processes and signaling	23	0.246332	C	2	chromosome	9337	NO	8
pBN	pPC_Library	over300	Virion structure and DNA packaging	Unknown	Unknown	13	HBA75_16405	rfbG	CDP-glucose 4.6-dehydratase	G	Metabolism	2373	25.415	A	3	chromosome	9337	NO	12
pBC	pPC_Library	over300	Virion structure and DNA packaging	Unknown	Unknown	13	HBA75_18825	infB	translation initiation factor IF-2	J	Information storage and processing	79	0.914881	B	2	chromosome	8635	B	24
pBN	pPC_Library	over300	Virion structure and DNA packaging	Unknown	Unknown	13	HBA75_18825	infB	translation initiation factor IF-2	J	Information storage and processing	9	0.0963907	C	2	chromosome	9337	C	24
pBC	pPN_Library	over300	Virion structure and DNA packaging	Unknown	Unknown	13	HBA75_18825	infB	translation initiation factor IF-2	J	Information storage and processing	2	0.0138764	C	2	chromosome	14413	B	24
pBN	pPC_Library	over300	Virion structure and DNA packaging	Unknown	Unknown	13	HBA75_18965	trmD	tRNA (guanosine(37)-N1)-methyltransferase TrmD	J	Information storage and processing	258	2.7632	B	3	chromosome	9337	NO	10
pBC	pPN_Library	over300	Virion structure and DNA packaging	Unknown	Unknown	13	HBA75_19290	ftsZ	cell division protein FtsZ	D	Cellular processes and signaling	4	0.0277527	C	2	chromosome	14413	B	24
pBC	pPC_Library	over300	Virion structure and DNA packaging	Unknown	Unknown	13	HBA75_19295	ftsA	cell division protein FtsA	D	Cellular processes and signaling	1292	14.9624	A	3	chromosome	8635	A	31
pBN	pPC_Library	over300	Virion structure and DNA packaging	Unknown	Unknown	13	HBA75_19295	ftsA	cell division protein FtsA	D	Cellular processes and signaling	299	3.20231	B	3	chromosome	9337	C	31
pBC	pPN_Library	over300	Virion structure and DNA packaging	Unknown	Unknown	13	HBA75_19295	ftsA	cell division protein FtsA	D	Cellular processes and signaling	81	0.561993	B	3	chromosome	14413	B	31
pBC	pPN_Library	over300	Virion structure and DNA packaging	Unknown	Unknown	13	HBA75_31050	recA	recombinase RecA	L	Information storage and processing	4	0.0277527	C	2	pLUSID3	14413	B	4
pBC	pPN_Library	over300	Virion structure and DNA packaging	Unknown	Unknown	13	HBA75_20835	yqhT	Xaa-Pro dipeptidase	E	Metabolism	176	1.22112	B	2	chromosome	14413	B	18
pBC	pPC_Library	over300	Virion structure and DNA packaging	Unknown	Unknown	13	HBA75_22945	ysdC	M42 family metallopeptidase	G	Metabolism	1504	17.4175	A	3	chromosome	8635	A	34
pBN	pPC_Library	over300	Virion structure and DNA packaging	Unknown	Unknown	13	HBA75_22945	ysdC	M42 family metallopeptidase	G	Metabolism	162	1.73503	B	3	chromosome	9337	A	34
pBC	pPN_Library	over300	Virion structure and DNA packaging	Unknown	Unknown	13	HBA75_22945	ysdC	M42 family metallopeptidase	G	Metabolism	4207	29.1889	A	3	chromosome	14413	A	34
pBC	pPC_Library	over300	Virion structure and DNA packaging	Unknown	Unknown	13	HBA75_23085	pyk	pyruvate kinase	G	Metabolism	75	0.868558	B	3	chromosome	8635	B	26
pBN	pPC_Library	over300	Virion structure and DNA packaging	Unknown	Unknown	13	HBA75_23085	pyk	pyruvate kinase	G	Metabolism	26	0.278462	B	3	chromosome	9337	C	26
pBN	pPC_Library	over300	Virion structure and DNA packaging	Unknown	Unknown	13	HBA75_23535	pncB	nicotinate phosphoribosyltransferase	H	Metabolism	633	6.77948	B	2	chromosome	9337	NO	8
pBN	pPN_Library	over300	Virion structure and DNA packaging	Unknown	Unknown	13	HBA75_23535	pncB	nicotinate phosphoribosyltransferase	H	Metabolism	1	0.0124069	C	3	chromosome	8060	NO	8
pBC	pPC_Library	over300	Virion structure and DNA packaging	Unknown	Unknown	13	HBA75_23625	pepV	dipeptidase PepV	E	Metabolism	335	3.87956	B	2	chromosome	8635	B	29
pBN	pPC_Library	over300	Virion structure and DNA packaging	Unknown	Unknown	13	HBA75_23625	pepV	dipeptidase PepV	E	Metabolism	1	0.0107101	C	2	chromosome	9337	C	29
pBC	pPN_Library	over300	Virion structure and DNA packaging	Unknown	Unknown	13	HBA75_23625	pepV	dipeptidase PepV	E	Metabolism	4	0.0277527	C	2	chromosome	14413	B	29
pBN	pPC_Library	over300	Virion structure and DNA packaging	Unknown	Unknown	13	HBA75_24670	pgi	glucose-6-phosphate isomerase	G	Metabolism	20	0.214202	C	1	chromosome	9337	NO
pBN	pPC_Library	over300	Virion structure and DNA packaging	Unknown	Unknown	13	HBA75_24925		endopeptidase	M	Cellular processes and signaling	1	0.0107101	C	2	chromosome	9337	NO
pBC	pPC_Library	over300	Virion structure and DNA packaging	Unknown	Unknown	13	HBA75_25400	sufB	Fe-S cluster assembly protein SufB	O	Cellular processes and signaling	1	0.0115808	C	3	chromosome	8635	C	16
pBN	pPC_Library	over300	Virion structure and DNA packaging	Unknown	Unknown	13	HBA75_25400	sufB	Fe-S cluster assembly protein SufB	O	Cellular processes and signaling	893	9.5641	B	3	chromosome	9337	NO	16
pBN	pPC_Library	over300	Virion structure and DNA packaging	Unknown	Unknown	13	HBA75_26335	cggR	gapA transcriptional regulator CggR	K	Information storage and processing	57	0.610474	B	2	chromosome	9337	NO	9
pBC	pPN_Library	over300	Virion structure and DNA packaging	Unknown	Unknown	13	HBA75_30425	ahpF	alkyl hydroperoxide reductase subunit F	O	Cellular processes and signaling	28	0.194269	C	3	pLUSID2	14413	B	20
pBC	pPC_Library	over300	Virion structure and DNA packaging	Unknown	Unknown	13	HBA75_30450		dipeptide epimerase	M	Cellular processes and signaling	2905	33.6422	A	3	pLUSID2	8635	A	31
pBN	pPC_Library	over300	Virion structure and DNA packaging	Unknown	Unknown	13	HBA75_30450		dipeptide epimerase	M	Cellular processes and signaling	527	5.64421	B	3	pLUSID2	9337	A	31
pBC	pPN_Library	over300	Virion structure and DNA packaging	Unknown	Unknown	13	HBA75_30450		dipeptide epimerase	M	Cellular processes and signaling	8	0.0555054	C	3	pLUSID2	14413	B	31
pBN	pPC_Library	over300	Virion structure and DNA packaging	Unknown	Unknown	13	HBA75_30635		IS110 family transposase	L	Information storage and processing	238	2.549	B	4	pLUSID2	9337	NO	9
pBN	pPC_Library	over300	Virion structure and DNA packaging	Unknown	Unknown	13	HBA75_30685	yfkA	radical SAM/CxCxxxxC motif protein YfkAB	S	Poorly characterized	179	1.9171	B	3	pLUSID2	9337	NO	7
pBC	pPC_Library	over300	Virion structure and DNA packaging	Unknown	Unknown	13	HBA75_30720		IS4 family transposase	L	Information storage and processing	980	11.3492	A	3	pLUSID2	8635	B	29
pBN	pPC_Library	over300	Virion structure and DNA packaging	Unknown	Unknown	13	HBA75_30720		IS4 family transposase	L	Information storage and processing	26	0.278462	B	3	pLUSID2	9337	B	29
pBC	pPN_Library	over300	Virion structure and DNA packaging	Unknown	Unknown	13	HBA75_30720		IS4 family transposase	L	Information storage and processing	55	0.3816	B	3	pLUSID2	14413	B	29
pBN	pPC_Library	over300	Virion structure and DNA packaging	Special vertex/DNA packaging	DNA packaging / ATPase*	14	HBA75_00375	prs	ribose-phosphate diphosphokinase	F	Metabolism	3	0.0318573	C	2	chromosome	9417	NO
pBC	pPC_Library	over300	Virion structure and DNA packaging	Special vertex/DNA packaging	DNA packaging / ATPase*	14	HBA75_00745	fusA	elongation factor G	J	Information storage and processing	1	0.00996016	C	2	chromosome	10040	C	10
pBN	pPC_Library	over300	Virion structure and DNA packaging	Special vertex/DNA packaging	DNA packaging / ATPase*	14	HBA75_01150	oppF	ABC transporter ATP-binding protein	E	Metabolism	6	0.0637146	C	2	chromosome	9417	NO
pBC	pPC_Library	over300	Virion structure and DNA packaging	Special vertex/DNA packaging	DNA packaging / ATPase*	14	HBA75_01455	alr	alanine racemase	E	Metabolism	897	8.93426	B	2	chromosome	10040	B	30
pBC	pPC_Library	under300	Virion structure and DNA packaging	Special vertex/DNA packaging	DNA packaging / ATPase*	14	HBA75_01455	alr	alanine racemase	E	Metabolism	28837	58.345	A	2	chromosome	49425	B	30
pBC	pPN_Library	under300	Virion structure and DNA packaging	Special vertex/DNA packaging	DNA packaging / ATPase*	14	HBA75_01455	alr	alanine racemase	E	Metabolism	1	0.00201865	C		chromosome	49538	NO	30
pBN	pPC_Library	over300	Virion structure and DNA packaging	Special vertex/DNA packaging	DNA packaging / ATPase*	14	HBA75_02620	citH	CitMHS family transporter	C	Metabolism	299	3.17511	B	3	chromosome	9417	NO	10
pBN	pPC_Library	over300	Virion structure and DNA packaging	Special vertex/DNA packaging	DNA packaging / ATPase*	14	HBA75_03335	yjbQ	sodium:proton antiporter	P	Metabolism	1	0.0106191	C	2	chromosome	9417	NO	7
pBC	pPC_Library	over300	Virion structure and DNA packaging	Special vertex/DNA packaging	DNA packaging / ATPase*	14	HBA75_03595	nrtA	ABC transporter substrate-binding protein	P	Metabolism	1566	15.5976	A	3	chromosome	10040	A	31
pBC	pPC_Library	under300	Virion structure and DNA packaging	Special vertex/DNA packaging	DNA packaging / ATPase*	14	HBA75_03595	nrtA	ABC transporter substrate-binding protein	P	Metabolism	208	0.42084	B	3	chromosome	49425	A	31
pBN	pPC_Library	over300	Virion structure and DNA packaging	Special vertex/DNA packaging	DNA packaging / ATPase*	14	HBA75_03595	nrtA	ABC transporter substrate-binding protein	P	Metabolism	842	8.94128	B	3	chromosome	9417	A	31
pBC	pPC_Library	over300	Virion structure and DNA packaging	Special vertex/DNA packaging	DNA packaging / ATPase*	14	HBA75_03795		DUF3238 domain-containing protein	S	Poorly characterized	63	0.62749	B	1	chromosome	10040	C	12
pBC	pPC_Library	under300	Virion structure and DNA packaging	Special vertex/DNA packaging	DNA packaging / ATPase*	14	HBA75_03795		DUF3238 domain-containing protein	S	Poorly characterized	32	0.0647446	C	1	chromosome	49425	C	12
pBN	pPC_Library	over300	Virion structure and DNA packaging	Special vertex/DNA packaging	DNA packaging / ATPase*	14	HBA75_03805	cdr	CoA-disulfide reductase	P	Metabolism	9	0.0955718	C	3	chromosome	9417	NO
pBN	pPC_Library	over300	Virion structure and DNA packaging	Special vertex/DNA packaging	DNA packaging / ATPase*	14	HBA75_04720		alpha/beta fold hydrolase	G	Metabolism	539	5.72369	B	3	chromosome	9417	NO	11
pBC	pPC_Library	over300	Virion structure and DNA packaging	Special vertex/DNA packaging	DNA packaging / ATPase*	14	HBA75_05295	hemE	uroporphyrinogen decarboxylase	H	Metabolism	1	0.00996016	C	2	chromosome	10040	C
pBC	pPC_Library	under300	Virion structure and DNA packaging	Special vertex/DNA packaging	DNA packaging / ATPase*	14	HBA75_05295	hemE	uroporphyrinogen decarboxylase	H	Metabolism	2	0.00404654	C	2	chromosome	49425	C
pBC	pPC_Library	over300	Virion structure and DNA packaging	Special vertex/DNA packaging	DNA packaging / ATPase*	14	HBA75_08260	fliM	flagellar motor switch protein FliM	N	Cellular processes and signaling	2	0.0199203	C	2	chromosome	10040	B	9
pBC	pPC_Library	under300	Virion structure and DNA packaging	Special vertex/DNA packaging	DNA packaging / ATPase*	14	HBA75_08260	fliM	flagellar motor switch protein FliM	N	Cellular processes and signaling	4	0.00809307	C	2	chromosome	49425	B	9
pBN	pPC_Library	over300	Virion structure and DNA packaging	Special vertex/DNA packaging	DNA packaging / ATPase*	14	HBA75_08565	yoeA	MATE family efflux transporter	V	Cellular processes and signaling	4	0.0424764	C	3	chromosome	9417	NO	7
pBC	pPC_Library	over300	Virion structure and DNA packaging	Special vertex/DNA packaging	DNA packaging / ATPase*	14	HBA75_08815	hflX	GTPase HflX	S	Poorly characterized	1	0.00996016	C	3	chromosome	10040	C
pBN	pPC_Library	over300	Virion structure and DNA packaging	Special vertex/DNA packaging	DNA packaging / ATPase*	14	HBA75_08815	hflX	GTPase HflX	S	Poorly characterized	5	0.0530955	C	3	chromosome	9417	NO
pBC	pPC_Library	over300	Virion structure and DNA packaging	Special vertex/DNA packaging	DNA packaging / ATPase*	14	HBA75_11115	atoD	acetate CoA-transferase subunit alpha	I	Metabolism	4	0.0398406	C	2	chromosome	10040	C	1
pBC	pPC_Library	over300	Virion structure and DNA packaging	Special vertex/DNA packaging	DNA packaging / ATPase*	14	HBA75_22900	pheS	phenylalanine--tRNA ligase subunit alpha	J	Information storage and processing	1	0.00996016	C	1	chromosome	10040	NO	2
pBC	pPC_Library	over300	Virion structure and DNA packaging	Special vertex/DNA packaging	DNA packaging / ATPase*	14	HBA75_26415		phage tail protein	S	Poorly characterized	3	0.0298805	C	1	chromosome	10040	NO	2
pBC	pPC_Library	under300	Virion structure and DNA packaging	Special vertex/DNA packaging	DNA packaging / ATPase*	14	HBA75_26415		phage tail protein	S	Poorly characterized	14	0.0283257	C	1	chromosome	49425	NO	2
pBC	pPC_Library	over300	Virion structure and DNA packaging	Special vertex/DNA packaging	DNA packaging / ATPase*	14	HBA75_30510		phage tail family protein	S	Poorly characterized	36	0.358566	B		pLUSID2	10040	C	6
pBC	pPC_Library	under300	Virion structure and DNA packaging	Special vertex/DNA packaging	DNA packaging / ATPase*	14	HBA75_30510		phage tail family protein	S	Poorly characterized	396	0.801214	B		pLUSID2	49425	C	6
pBN	pPC_Library	over300	Virion structure and DNA packaging	Special vertex/DNA packaging	DNA packaging / ATPase*	14	HBA75_05850	oppB	ABC transporter permease	P	Metabolism	1	0.0106191	C	1	chromosome	9417	NO	3
pBN	pPC_Library	over300	Virion structure and DNA packaging	Special vertex/DNA packaging	DNA packaging / ATPase*	14	HBA75_15635		AAA family ATPase	L	Information storage and processing	4	0.0424764	C	2	chromosome	9417	NO	1
pBN	pPC_Library	over300	Virion structure and DNA packaging	Special vertex/DNA packaging	DNA packaging / ATPase*	14	HBA75_25540	fadM	proline dehydrogenase	E	Metabolism	2	0.0212382	C	2	chromosome	9417	NO	1
pBN	pPC_Library	over300	Virion structure and DNA packaging	Special vertex/DNA packaging	DNA packaging / ATPase*	14	HBA75_27105	cydA	cytochrome ubiquinol oxidase subunit I	C	Metabolism	1	0.0106191	C	2	chromosome	9417	NO	3
pBN	pPC_Library	over300	Virion structure and DNA packaging	Special vertex/DNA packaging	DNA packaging / ATPase*	14	HBA75_27190	iap	SH3 domain-containing protein	T	Cellular processes and signaling	1	0.0106191	C	2	chromosome	9417	NO	6
pBN	pPC_Library	over300	Virion structure and DNA packaging	Special vertex/DNA packaging	DNA packaging / ATPase*	14	HBA75_27530	nuoL	NADH-quinone oxidoreductase subunit L	C	Metabolism	1	0.0106191	C	2	chromosome	9417	NO	5
pBC	pPC_Library	under300	Virion structure and DNA packaging	Special vertex/DNA packaging	DNA packaging / ATPase*	14	HBA75_11325	prpD	2-methylcitrate dehydratase	S	Poorly characterized	1	0.00202327	C	2	chromosome	49425	C	8
pBC	pPC_Library	over300	Virion structure and DNA packaging	Special vertex/DNA packaging	DNA packaging / ATPase*	14	HBA75_14510	aroC	chorismate synthase	E	Metabolism	3	0.0298805	C	1	chromosome	10040	C
pBC	pPC_Library	under300	Virion structure and DNA packaging	Special vertex/DNA packaging	DNA packaging / ATPase*	14	HBA75_14510	aroC	chorismate synthase	E	Metabolism	4	0.00809307	C	1	chromosome	49425	C
pBC	pPC_Library	over300	Virion structure and DNA packaging	Special vertex/DNA packaging	DNA packaging / ATPase*	14	HBA75_14680	proB	glutamate 5-kinase	E	Metabolism	136	1.35458	B	1	chromosome	10040	C	15
pBC	pPC_Library	under300	Virion structure and DNA packaging	Special vertex/DNA packaging	DNA packaging / ATPase*	14	HBA75_14680	proB	glutamate 5-kinase	E	Metabolism	46	0.0930703	C	1	chromosome	49425	C	15
pBC	pPC_Library	over300	Virion structure and DNA packaging	Special vertex/DNA packaging	DNA packaging / ATPase*	14	HBA75_15655		beta-lactamase family protein	V	Cellular processes and signaling	100	0.996016	B	2	chromosome	10040	NO	8
pBC	pPC_Library	under300	Virion structure and DNA packaging	Special vertex/DNA packaging	DNA packaging / ATPase*	14	HBA75_15655		beta-lactamase family protein	V	Cellular processes and signaling	11	0.0222559	C	2	chromosome	49425	NO	8
pBN	pPC_Library	over300	Virion structure and DNA packaging	Special vertex/DNA packaging	DNA packaging / ATPase*	14	HBA75_15655		beta-lactamase family protein	V	Cellular processes and signaling	74	0.785813	B	2	chromosome	9417	NO	8
pBN	pPN_Library	over300	Virion structure and DNA packaging	Special vertex/DNA packaging	DNA packaging / ATPase*	14	HBA75_15655		beta-lactamase family protein	V	Cellular processes and signaling	2567	29.8766	A	1	chromosome	8592	NO	8
pBC	pPC_Library	over300	Virion structure and DNA packaging	Special vertex/DNA packaging	DNA packaging / ATPase*	14	HBA75_16405	rfbG	CDP-glucose 4.6-dehydratase	G	Metabolism	1	0.00996016	C	3	chromosome	10040	NO	12
pBN	pPC_Library	over300	Virion structure and DNA packaging	Special vertex/DNA packaging	DNA packaging / ATPase*	14	HBA75_16405	rfbG	CDP-glucose 4.6-dehydratase	G	Metabolism	542	5.75555	B	3	chromosome	9417	NO	12
pBN	pPC_Library	over300	Virion structure and DNA packaging	Special vertex/DNA packaging	DNA packaging / ATPase*	14	HBA75_18180	phnC	phosphonate ABC transporter ATP-binding protein	P	Metabolism	3	0.0318573	C	3	chromosome	9417	NO
pBC	pPC_Library	over300	Virion structure and DNA packaging	Special vertex/DNA packaging	DNA packaging / ATPase*	14	HBA75_18825	infB	translation initiation factor IF-2	J	Information storage and processing	315	3.13745	B	2	chromosome	10040	B	24
pBC	pPC_Library	under300	Virion structure and DNA packaging	Special vertex/DNA packaging	DNA packaging / ATPase*	14	HBA75_18825	infB	translation initiation factor IF-2	J	Information storage and processing	60	0.121396	C	2	chromosome	49425	B	24
pBC	pPC_Library	over300	Virion structure and DNA packaging	Special vertex/DNA packaging	DNA packaging / ATPase*	14	HBA75_19295	ftsA	cell division protein FtsA	D	Cellular processes and signaling	583	5.80677	B	3	chromosome	10040	A	31
pBC	pPC_Library	under300	Virion structure and DNA packaging	Special vertex/DNA packaging	DNA packaging / ATPase*	14	HBA75_19295	ftsA	cell division protein FtsA	D	Cellular processes and signaling	4	0.00809307	C	3	chromosome	49425	A	31
pBN	pPC_Library	over300	Virion structure and DNA packaging	Special vertex/DNA packaging	DNA packaging / ATPase*	14	HBA75_19295	ftsA	cell division protein FtsA	D	Cellular processes and signaling	4	0.0424764	C	3	chromosome	9417	C	31
pBC	pPC_Library	over300	Virion structure and DNA packaging	Special vertex/DNA packaging	DNA packaging / ATPase*	14	HBA75_22945	ysdC	M42 family metallopeptidase	G	Metabolism	2268	22.5896	A	3	chromosome	10040	A	34
pBC	pPC_Library	under300	Virion structure and DNA packaging	Special vertex/DNA packaging	DNA packaging / ATPase*	14	HBA75_22945	ysdC	M42 family metallopeptidase	G	Metabolism	78	0.157815	C	3	chromosome	49425	A	34
pBN	pPC_Library	over300	Virion structure and DNA packaging	Special vertex/DNA packaging	DNA packaging / ATPase*	14	HBA75_22945	ysdC	M42 family metallopeptidase	G	Metabolism	29	0.307954	B	3	chromosome	9417	A	34
pBC	pPC_Library	over300	Virion structure and DNA packaging	Special vertex/DNA packaging	DNA packaging / ATPase*	14	HBA75_23085	pyk	pyruvate kinase	G	Metabolism	302	3.00797	B	3	chromosome	10040	B	26
pBC	pPC_Library	under300	Virion structure and DNA packaging	Special vertex/DNA packaging	DNA packaging / ATPase*	14	HBA75_23085	pyk	pyruvate kinase	G	Metabolism	8	0.0161861	C	3	chromosome	49425	B	26
pBN	pPC_Library	over300	Virion structure and DNA packaging	Special vertex/DNA packaging	DNA packaging / ATPase*	14	HBA75_23085	pyk	pyruvate kinase	G	Metabolism	88	0.93448	B	3	chromosome	9417	C	26
pBC	pPC_Library	over300	Virion structure and DNA packaging	Special vertex/DNA packaging	DNA packaging / ATPase*	14	HBA75_23625	pepV	dipeptidase PepV	E	Metabolism	450	4.48207	B	2	chromosome	10040	B	29
pBC	pPC_Library	under300	Virion structure and DNA packaging	Special vertex/DNA packaging	DNA packaging / ATPase*	14	HBA75_23625	pepV	dipeptidase PepV	E	Metabolism	42	0.0849772	C	2	chromosome	49425	B	29
pBN	pPC_Library	over300	Virion structure and DNA packaging	Special vertex/DNA packaging	DNA packaging / ATPase*	14	HBA75_25400	sufB	Fe-S cluster assembly protein SufB	O	Cellular processes and signaling	21	0.223001	C	3	chromosome	9417	NO	16
pBC	pPC_Library	over300	Virion structure and DNA packaging	Special vertex/DNA packaging	DNA packaging / ATPase*	14	HBA75_30450		dipeptide epimerase	M	Cellular processes and signaling	1485	14.7908	A	3	pLUSID2	10040	A	31
pBC	pPC_Library	under300	Virion structure and DNA packaging	Special vertex/DNA packaging	DNA packaging / ATPase*	14	HBA75_30450		dipeptide epimerase	M	Cellular processes and signaling	34	0.0687911	C	3	pLUSID2	49425	A	31
pBN	pPC_Library	over300	Virion structure and DNA packaging	Special vertex/DNA packaging	DNA packaging / ATPase*	14	HBA75_30450		dipeptide epimerase	M	Cellular processes and signaling	5992	63.6296	A	3	pLUSID2	9417	A	31
pBC	pPC_Library	over300	Virion structure and DNA packaging	Special vertex/DNA packaging	DNA packaging / ATPase*	14	HBA75_30635		IS110 family transposase	L	Information storage and processing	1	0.00996016	C	4	pLUSID2	10040	NO	9
pBN	pPC_Library	over300	Virion structure and DNA packaging	Special vertex/DNA packaging	DNA packaging / ATPase*	14	HBA75_30635		IS110 family transposase	L	Information storage and processing	8	0.0849527	C	4	pLUSID2	9417	NO	9
pBC	pPC_Library	over300	Virion structure and DNA packaging	Special vertex/DNA packaging	DNA packaging / ATPase*	14	HBA75_30720		IS4 family transposase	L	Information storage and processing	878	8.74502	B	3	pLUSID2	10040	B	29
pBC	pPC_Library	under300	Virion structure and DNA packaging	Special vertex/DNA packaging	DNA packaging / ATPase*	14	HBA75_30720		IS4 family transposase	L	Information storage and processing	10	0.0202327	C	3	pLUSID2	49425	B	29
pBN	pPN_Library	over300	Virion structure and DNA packaging	Special vertex/DNA packaging	Special vertex*	15	HBA75_00725	rpoC	DNA-directed RNA polymerase subunit beta'	K	Information storage and processing	1	0.0105775	C	3	chromosome	9454	NO
pBC	pPN_Library	over300	Virion structure and DNA packaging	Special vertex/DNA packaging	Special vertex*	15	HBA75_00795	rplP	50S ribosomal protein L16	J	Information storage and processing	2	0.015124	C	3	chromosome	13224	NO
pBC	pPC_Library	over300	Virion structure and DNA packaging	Special vertex/DNA packaging	Special vertex*	15	HBA75_01455	alr	alanine racemase	E	Metabolism	19	0.163596	C	2	chromosome	11614	B	30
pBN	pPC_Library	over300	Virion structure and DNA packaging	Special vertex/DNA packaging	Special vertex*	15	HBA75_02620	citH	CitMHS family transporter	C	Metabolism	7114	74.4298	A	3	chromosome	9558	NO	10
pBC	pPN_Library	over300	Virion structure and DNA packaging	Special vertex/DNA packaging	Special vertex*	15	HBA75_02620	citH	CitMHS family transporter	C	Metabolism	33	0.249546	C	4	chromosome	13224	NO	10
pBN	pPN_Library	over300	Virion structure and DNA packaging	Special vertex/DNA packaging	Special vertex*	15	HBA75_02665	ugpE	carbohydrate ABC transporter permease	P	Metabolism	2	0.0211551	C	3	chromosome	9454	NO
pBN	pPC_Library	over300	Virion structure and DNA packaging	Special vertex/DNA packaging	Special vertex*	15	HBA75_02890	aspA	aspartate ammonia-lyase	E	Metabolism	1	0.0104624	C	3	chromosome	9558	C	10
pBN	pPC_Library	over300	Virion structure and DNA packaging	Special vertex/DNA packaging	Special vertex*	15	HBA75_03335	yjbQ	sodium:proton antiporter	P	Metabolism	132	1.38104	B	2	chromosome	9558	NO	7
pBN	pPN_Library	over300	Virion structure and DNA packaging	Special vertex/DNA packaging	Special vertex*	15	HBA75_03440	cusA	efflux RND transporter permease subunit	V	Cellular processes and signaling	14	0.148085	C	3	chromosome	9454	NO
pBC	pPC_Library	over300	Virion structure and DNA packaging	Special vertex/DNA packaging	Special vertex*	15	HBA75_03595	nrtA	ABC transporter substrate-binding protein	P	Metabolism	26	0.223868	C	3	chromosome	11614	A	31
pBN	pPC_Library	over300	Virion structure and DNA packaging	Special vertex/DNA packaging	Special vertex*	15	HBA75_03595	nrtA	ABC transporter substrate-binding protein	P	Metabolism	1	0.0104624	C	3	chromosome	9558	A	31
pBC	pPN_Library	over300	Virion structure and DNA packaging	Special vertex/DNA packaging	Special vertex*	15	HBA75_03615	thiG	thiazole synthase	H	Metabolism	16	0.120992	C	2	chromosome	13224	A	25
pBC	pPN_Library	over300	Virion structure and DNA packaging	Special vertex/DNA packaging	Special vertex*	15	HBA75_03670	yvmA	MFS transporter	E	Metabolism	11	0.0831821	C	4	chromosome	13224	NO
pBC	pPC_Library	over300	Virion structure and DNA packaging	Special vertex/DNA packaging	Special vertex*	15	HBA75_03795		DUF3238 domain-containing protein	S	Poorly characterized	3	0.0258309	C	1	chromosome	11614	C	12
pBC	pPN_Library	over300	Virion structure and DNA packaging	Special vertex/DNA packaging	Special vertex*	15	HBA75_03905		DUF871 domain-containing protein	S	Poorly characterized	1	0.00756201	C	2	chromosome	13224	NO
pBC	pPN_Library	over300	Virion structure and DNA packaging	Special vertex/DNA packaging	Special vertex*	15	HBA75_04365		methyltransferase	L	Information storage and processing	10	0.0756201	C	3	chromosome	13224	NO	11
pBC	pPN_Library	over300	Virion structure and DNA packaging	Special vertex/DNA packaging	Special vertex*	15	HBA75_04390		ABC transporter permease	P	Metabolism	6	0.0453721	C	4	chromosome	13224	NO
pBN	pPN_Library	over300	Virion structure and DNA packaging	Special vertex/DNA packaging	Special vertex*	15	HBA75_04390		ABC transporter permease	P	Metabolism	3	0.0317326	C	4	chromosome	9454	NO
pBN	pPC_Library	over300	Virion structure and DNA packaging	Special vertex/DNA packaging	Special vertex*	15	HBA75_07255	ccsA	cytochrome c biogenesis protein ResC	O	Cellular processes and signaling	1	0.0104624	C	2	chromosome	9558	NO
pBN	pPC_Library	over300	Virion structure and DNA packaging	Special vertex/DNA packaging	Special vertex*	15	HBA75_08565	yoeA	MATE family efflux transporter	V	Cellular processes and signaling	875	9.15463	B	3	chromosome	9558	NO	7
pBC	pPN_Library	over300	Virion structure and DNA packaging	Special vertex/DNA packaging	Special vertex*	15	HBA75_08740	lysC	aspartate kinase	E	Metabolism	1	0.00756201	C	2	chromosome	13224	C
pBC	pPN_Library	over300	Virion structure and DNA packaging	Special vertex/DNA packaging	Special vertex*	15	HBA75_08815	hflX	GTPase HflX	S	Poorly characterized	5	0.03781	C	3	chromosome	13224	NO
pBN	pPC_Library	over300	Virion structure and DNA packaging	Special vertex/DNA packaging	Special vertex*	15	HBA75_05425	cysT	sulfate ABC transporter permease subunit CysT	O	Cellular processes and signaling	98	1.02532	B	2	chromosome	9558	NO	5
pBN	pPC_Library	over300	Virion structure and DNA packaging	Special vertex/DNA packaging	Special vertex*	15	HBA75_05850	oppB	ABC transporter permease	P	Metabolism	8	0.0836995	C	1	chromosome	9558	NO	3
pBN	pPC_Library	over300	Virion structure and DNA packaging	Special vertex/DNA packaging	Special vertex*	15	HBA75_07395	seaA	hypothetical protein	S	Poorly characterized	4	0.0418498	C	2	chromosome	9558	NO	3
pBN	pPC_Library	over300	Virion structure and DNA packaging	Special vertex/DNA packaging	Special vertex*	15	HBA75_14835	proP	MFS transporter	E	Metabolism	9	0.094162	C		chromosome	9558	NO	1
pBN	pPC_Library	over300	Virion structure and DNA packaging	Special vertex/DNA packaging	Special vertex*	15	HBA75_16200		hypothetical protein	NO		7	0.0732371	C	2	chromosome	9558	NO	3
pBN	pPC_Library	over300	Virion structure and DNA packaging	Special vertex/DNA packaging	Special vertex*	15	HBA75_16385	tlyC	HlyC/CorC family transporter	S	Poorly characterized	7	0.0732371	C	2	chromosome	9558	NO	4
pBN	pPC_Library	over300	Virion structure and DNA packaging	Special vertex/DNA packaging	Special vertex*	15	HBA75_20040	ptsG	PTS glucose transporter subunit IIABC	G	Metabolism	38	0.397573	B	2	chromosome	9558	NO	1
pBN	pPC_Library	over300	Virion structure and DNA packaging	Special vertex/DNA packaging	Special vertex*	15	HBA75_23840	salY	ABC transporter permease	V	Cellular processes and signaling	5	0.0523122	C	2	chromosome	9558	NO	1
pBN	pPC_Library	over300	Virion structure and DNA packaging	Special vertex/DNA packaging	Special vertex*	15	HBA75_27035	ywbA	PTS cellobiose transporter subunit IIC	G	Metabolism	3	0.0313873	C	2	chromosome	9558	NO	1
pBN	pPC_Library	over300	Virion structure and DNA packaging	Special vertex/DNA packaging	Special vertex*	15	HBA75_27105	cydA	cytochrome ubiquinol oxidase subunit I	C	Metabolism	187	1.95648	B	2	chromosome	9558	NO	3
pBN	pPC_Library	over300	Virion structure and DNA packaging	Special vertex/DNA packaging	Special vertex*	15	HBA75_27190	iap	SH3 domain-containing protein	T	Cellular processes and signaling	100	1.04624	B	2	chromosome	9558	NO	6
pBN	pPC_Library	over300	Virion structure and DNA packaging	Special vertex/DNA packaging	Special vertex*	15	HBA75_27330	manP	PTS transporter subunit EIIA	G	Metabolism	63	0.659134	B	2	chromosome	9558	NO	5
pBN	pPC_Library	over300	Virion structure and DNA packaging	Special vertex/DNA packaging	Special vertex*	15	HBA75_27520	nuoN	NADH-quinone oxidoreductase subunit NuoN	C	Metabolism	31	0.324336	B	2	chromosome	9558	NO	5
pBN	pPC_Library	over300	Virion structure and DNA packaging	Special vertex/DNA packaging	Special vertex*	15	HBA75_27530	nuoL	NADH-quinone oxidoreductase subunit L	C	Metabolism	99	1.03578	B	2	chromosome	9558	NO	5
pBN	pPC_Library	over300	Virion structure and DNA packaging	Special vertex/DNA packaging	Special vertex*	15	HBA75_28175	yadS	trimeric intracellular cation channel family protein	S	Poorly characterized	14	0.146474	C	2	chromosome	9558	NO	5
pBN	pPC_Library	over300	Virion structure and DNA packaging	Special vertex/DNA packaging	Special vertex*	15	HBA75_30055	ctp	cation-translocating P-type ATPase	P	Metabolism	10	0.104624	C	2	pLUSID2	9558	NO	2
pBC	pPN_Library	over300	Virion structure and DNA packaging	Special vertex/DNA packaging	Special vertex*	15	HBA75_00735	rpsL	30S ribosomal protein S12	J	Information storage and processing	2	0.015124	C	4	chromosome	13224	NO	1
pBC	pPN_Library	over300	Virion structure and DNA packaging	Special vertex/DNA packaging	Special vertex*	15	HBA75_06105	putP	sodium/proline symporter PutP	E	Metabolism	2	0.015124	C	4	chromosome	13224	NO	2
pBC	pPN_Library	over300	Virion structure and DNA packaging	Special vertex/DNA packaging	Special vertex*	15	HBA75_07665	yppG	spore coat protein	NO		40	0.30248	B	3	chromosome	13224	NO	1
pBC	pPN_Library	over300	Virion structure and DNA packaging	Special vertex/DNA packaging	Special vertex*	15	HBA75_25320	glpX	class II fructose-bisphosphatase	G	Metabolism	3	0.022686	C	2	chromosome	13224	B	1
pBC	pPN_Library	over300	Virion structure and DNA packaging	Special vertex/DNA packaging	Special vertex*	15	HBA75_26060		endopeptidase	M	Cellular processes and signaling	6	0.0453721	C	4	chromosome	13224	NO	1
pBC	pPN_Library	over300	Virion structure and DNA packaging	Special vertex/DNA packaging	Special vertex*	15	HBA75_26390	virB5	peptidase S74	U	Cellular processes and signaling	3	0.022686	C	3	chromosome	13224	NO	1
pBC	pPN_Library	over300	Virion structure and DNA packaging	Special vertex/DNA packaging	Special vertex*	15	HBA75_29670	ltrA	group II intron reverse transcriptase/maturase	L	Information storage and processing	79	0.597399	B	4	pLUSID1	13224	NO	2
pBC	pPN_Library	under300	Virion structure and DNA packaging	Special vertex/DNA packaging	Special vertex*	15	HBA75_29670	ltrA	group II intron reverse transcriptase/maturase	L	Information storage and processing	3	0.00886866	C	4	pLUSID1	33827	NO	2
pBN	pPN_Library	over300	Virion structure and DNA packaging	Special vertex/DNA packaging	Special vertex*	15	HBA75_12045	pepD	beta-Ala-His dipeptidase	E	Metabolism	1	0.0105775	C	2	chromosome	9454	NO	4
pBN	pPN_Library	over300	Virion structure and DNA packaging	Special vertex/DNA packaging	Special vertex*	15	HBA75_30985		phage tail tape measure protein	D	Cellular processes and signaling	8763	92.6909	A	2	pLUSID3	9454	NO	5
pBC	pPC_Library	over300	Virion structure and DNA packaging	Special vertex/DNA packaging	Special vertex*	15	HBA75_14680	proB	glutamate 5-kinase	E	Metabolism	3	0.0258309	C	1	chromosome	11614	C	15
pBC	pPN_Library	over300	Virion structure and DNA packaging	Special vertex/DNA packaging	Special vertex*	15	HBA75_14995	drgA	nitroreductase family protein	C	Metabolism	11	0.0831821	C	2	chromosome	13224	NO
pBC	pPN_Library	under300	Virion structure and DNA packaging	Special vertex/DNA packaging	Special vertex*	15	HBA75_14995	drgA	nitroreductase family protein	C	Metabolism	1	0.00295622	C	2	chromosome	33827	NO
pBC	pPN_Library	over300	Virion structure and DNA packaging	Special vertex/DNA packaging	Special vertex*	15	HBA75_15745		DHA2 family efflux MFS transporter permease subunit	E	Metabolism	8	0.0604961	C	3	chromosome	13224	NO
pBC	pPN_Library	over300	Virion structure and DNA packaging	Special vertex/DNA packaging	Special vertex*	15	HBA75_17515	dhaS	aldehyde dehydrogenase DhaS	C	Metabolism	1	0.00756201	C	2	chromosome	13224	NO
pBC	pPN_Library	over300	Virion structure and DNA packaging	Special vertex/DNA packaging	Special vertex*	15	HBA75_17615	fdhA	formate dehydrogenase subunit alpha	C	Metabolism	2	0.015124	C	1	chromosome	13224	C
pBC	pPN_Library	over300	Virion structure and DNA packaging	Special vertex/DNA packaging	Special vertex*	15	HBA75_17990		group II intron reverse transcriptase/maturase	L	Information storage and processing	1	0.00756201	C	3	chromosome	13224	NO
pBN	pPC_Library	over300	Virion structure and DNA packaging	Special vertex/DNA packaging	Special vertex*	15	HBA75_18350	iap	SH3 domain-containing protein	T	Cellular processes and signaling	5	0.0523122	C		chromosome	9558	NO
pBC	pPN_Library	over300	Virion structure and DNA packaging	Special vertex/DNA packaging	Special vertex*	15	HBA75_18755	dapA	4-hydroxy-tetrahydrodipicolinate synthase	E	Metabolism	9	0.0680581	C	2	chromosome	13224	NO
pBC	pPC_Library	over300	Virion structure and DNA packaging	Special vertex/DNA packaging	Special vertex*	15	HBA75_18825	infB	translation initiation factor IF-2	J	Information storage and processing	9	0.0774927	C	2	chromosome	11614	B	24
pBC	pPN_Library	over300	Virion structure and DNA packaging	Special vertex/DNA packaging	Special vertex*	15	HBA75_19290	ftsZ	cell division protein FtsZ	D	Cellular processes and signaling	16	0.120992	C	2	chromosome	13224	B	24
pBC	pPN_Library	under300	Virion structure and DNA packaging	Special vertex/DNA packaging	Special vertex*	15	HBA75_19290	ftsZ	cell division protein FtsZ	D	Cellular processes and signaling	12	0.0354746	C	2	chromosome	33827	B	24
pBC	pPC_Library	over300	Virion structure and DNA packaging	Special vertex/DNA packaging	Special vertex*	15	HBA75_19295	ftsA	cell division protein FtsA	D	Cellular processes and signaling	5	0.0430515	C	3	chromosome	11614	A	31
pBN	pPN_Library	over300	Virion structure and DNA packaging	Special vertex/DNA packaging	Special vertex*	15	HBA75_19295	ftsA	cell division protein FtsA	D	Cellular processes and signaling	3	0.0317326	C	3	chromosome	9454	NO	31
pBC	pPN_Library	over300	Virion structure and DNA packaging	Special vertex/DNA packaging	Special vertex*	15	HBA75_19385	ylbM	nucleotidyltransferase	S	Poorly characterized	24	0.181488	C	3	chromosome	13224	NO
pBC	pPN_Library	under300	Virion structure and DNA packaging	Special vertex/DNA packaging	Special vertex*	15	HBA75_19385	ylbM	nucleotidyltransferase	S	Poorly characterized	1	0.00295622	C	3	chromosome	33827	NO
pBC	pPN_Library	over300	Virion structure and DNA packaging	Special vertex/DNA packaging	Special vertex*	15	HBA75_20185	spoIIAB	anti-sigma F factor	F	Metabolism	12	0.0907441	C	3	chromosome	13224	NO
pBC	pPN_Library	under300	Virion structure and DNA packaging	Special vertex/DNA packaging	Special vertex*	15	HBA75_20185	spoIIAB	anti-sigma F factor	F	Metabolism	1	0.00295622	C	3	chromosome	33827	NO
pBC	pPN_Library	over300	Virion structure and DNA packaging	Special vertex/DNA packaging	Special vertex*	15	HBA75_20500	sdaAA	L-serine ammonia-lyase. iron-sulfur-dependent. subunit alpha	E	Metabolism	8	0.0604961	C	3	chromosome	13224	NO
pBC	pPN_Library	under300	Virion structure and DNA packaging	Special vertex/DNA packaging	Special vertex*	15	HBA75_21940	tgt	tRNA guanosine(34) transglycosylase Tgt	F	Metabolism	1	0.00295622	C	1	chromosome	33827	NO
pBC	pPC_Library	over300	Virion structure and DNA packaging	Special vertex/DNA packaging	Special vertex*	15	HBA75_22945	ysdC	M42 family metallopeptidase	G	Metabolism	6890	59.325	A	3	chromosome	11614	A	34
pBN	pPC_Library	over300	Virion structure and DNA packaging	Special vertex/DNA packaging	Special vertex*	15	HBA75_22945	ysdC	M42 family metallopeptidase	G	Metabolism	1	0.0104624	C	3	chromosome	9558	A	34
pBC	pPN_Library	over300	Virion structure and DNA packaging	Special vertex/DNA packaging	Special vertex*	15	HBA75_22945	ysdC	M42 family metallopeptidase	G	Metabolism	16	0.120992	C	3	chromosome	13224	A	34
pBC	pPC_Library	over300	Virion structure and DNA packaging	Special vertex/DNA packaging	Special vertex*	15	HBA75_23085	pyk	pyruvate kinase	G	Metabolism	4	0.0344412	C	3	chromosome	11614	B	26
pBC	pPN_Library	over300	Virion structure and DNA packaging	Special vertex/DNA packaging	Special vertex*	15	HBA75_23540	sftA	DNA translocase FtsK	D	Cellular processes and signaling	9	0.0680581	C	3	chromosome	13224	NO
pBC	pPC_Library	over300	Virion structure and DNA packaging	Special vertex/DNA packaging	Special vertex*	15	HBA75_23625	pepV	dipeptidase PepV	E	Metabolism	953	8.20561	B	2	chromosome	11614	B	29
pBC	pPN_Library	over300	Virion structure and DNA packaging	Special vertex/DNA packaging	Special vertex*	15	HBA75_24750	glyQS	glycine--tRNA ligase	J	Information storage and processing	2	0.015124	C	2	chromosome	13224	NO
pBC	pPN_Library	over300	Virion structure and DNA packaging	Special vertex/DNA packaging	Special vertex*	15	HBA75_25355	yhfC	YhfC family intramembrane metalloprotease	S	Poorly characterized	9	0.0680581	C	3	chromosome	13224	NO
pBN	pPC_Library	over300	Virion structure and DNA packaging	Special vertex/DNA packaging	Special vertex*	15	HBA75_25590	yidC	membrane protein insertase YidC	U	Cellular processes and signaling	7	0.0732371	C	3	chromosome	9558	NO
pBC	pPN_Library	over300	Virion structure and DNA packaging	Special vertex/DNA packaging	Special vertex*	15	HBA75_26870	MA20_14895	YeiH family putative sulfate export transporter	S	Poorly characterized	2	0.015124	C	3	chromosome	13224	NO
pBC	pPN_Library	over300	Virion structure and DNA packaging	Special vertex/DNA packaging	Special vertex*	15	HBA75_27070	gltT	dicarboxylate/amino acid:cation symporter	C	Metabolism	7	0.0529341	C	3	chromosome	13224	NO
pBC	pPN_Library	over300	Virion structure and DNA packaging	Special vertex/DNA packaging	Special vertex*	15	HBA75_27605	atpA	F0F1 ATP synthase subunit alpha	C	Metabolism	1	0.00756201	C	4	chromosome	13224	NO
pBN	pPC_Library	over300	Virion structure and DNA packaging	Special vertex/DNA packaging	Special vertex*	15	HBA75_28255	lrgB	antiholin-like protein LrgB	M	Cellular processes and signaling	3	0.0313873	C	1	chromosome	9558	NO
pBC	pPN_Library	over300	Virion structure and DNA packaging	Special vertex/DNA packaging	Special vertex*	15	HBA75_28385	vicX	MBL fold metallo-hydrolase	S	Poorly characterized	10	0.0756201	C	3	chromosome	13224	NO
pBC	pPN_Library	under300	Virion structure and DNA packaging	Special vertex/DNA packaging	Special vertex*	15	HBA75_28385	vicX	MBL fold metallo-hydrolase	S	Poorly characterized	1	0.00295622	C	3	chromosome	33827	NO
pBN	pPC_Library	over300	Virion structure and DNA packaging	Special vertex/DNA packaging	Special vertex*	15	HBA75_28480	ykuT	mechanosensitive ion channel family protein	M	Cellular processes and signaling	1	0.0104624	C		chromosome	9558	NO
pBC	pPN_Library	over300	Virion structure and DNA packaging	Special vertex/DNA packaging	Special vertex*	15	HBA75_29475		IS200/IS605 family element transposase accessoryprotein TnpB	L	Information storage and processing	18	0.136116	C	3	pLUSID1	13224	NO
pBC	pPN_Library	over300	Virion structure and DNA packaging	Special vertex/DNA packaging	Special vertex*	15	HBA75_29995		IS21-like element IS232 family transposase	L	Information storage and processing	3	0.022686	C	3	pLUSID1	13224	NO
pBC	pPN_Library	over300	Virion structure and DNA packaging	Special vertex/DNA packaging	Special vertex*	15	HBA75_30400	fhuG	iron ABC transporter permease	P	Metabolism	3	0.022686	C	3	pLUSID2	13224	NO
pBC	pPC_Library	over300	Virion structure and DNA packaging	Special vertex/DNA packaging	Special vertex*	15	HBA75_30450		dipeptide epimerase	M	Cellular processes and signaling	33	0.28414	B	3	pLUSID2	11614	A	31
pBN	pPC_Library	over300	Virion structure and DNA packaging	Special vertex/DNA packaging	Special vertex*	15	HBA75_30450		dipeptide epimerase	M	Cellular processes and signaling	1	0.0104624	C	3	pLUSID2	9558	A	31
pBC	pPN_Library	over300	Virion structure and DNA packaging	Special vertex/DNA packaging	Special vertex*	15	HBA75_30635		IS110 family transposase	L	Information storage and processing	8	0.0604961	C	4	pLUSID2	13224	NO	9
pBC	pPC_Library	over300	Virion structure and DNA packaging	Special vertex/DNA packaging	Special vertex*	15	HBA75_30720		IS4 family transposase	L	Information storage and processing	57	0.490787	B	3	pLUSID2	11614	B	29
pBN	pPC_Library	over300	Virion structure and DNA packaging	Special vertex/DNA packaging	DNA packaging*	16	HBA75_02620	citH	CitMHS family transporter	C	Metabolism	12457	61.0159	A	3	chromosome	20416	NO	10
pBN	pPC_Library	over300	Virion structure and DNA packaging	Special vertex/DNA packaging	DNA packaging*	16	HBA75_03335	yjbQ	sodium:proton antiporter	P	Metabolism	1305	6.39205	B	2	chromosome	20416	NO	7
pBN	pPC_Library	over300	Virion structure and DNA packaging	Special vertex/DNA packaging	DNA packaging*	16	HBA75_03870		MFS transporter	E	Metabolism	1	0.00489812	C		chromosome	20416	NO
pBN	pPC_Library	over300	Virion structure and DNA packaging	Special vertex/DNA packaging	DNA packaging*	16	HBA75_08565	yoeA	MATE family efflux transporter	V	Cellular processes and signaling	4046	19.8178	A	3	chromosome	20416	NO	7
pBN	pPC_Library	over300	Virion structure and DNA packaging	Special vertex/DNA packaging	DNA packaging*	16	HBA75_10780		ABC transporter permease	U	Cellular processes and signaling	9	0.0440831	C		chromosome	20416	NO
pBN	pPC_Library	over300	Virion structure and DNA packaging	Special vertex/DNA packaging	DNA packaging*	16	HBA75_05425	cysT	sulfate ABC transporter permease subunit CysT	O	Cellular processes and signaling	5	0.0244906	C	2	chromosome	20416	NO	5
pBN	pPC_Library	over300	Virion structure and DNA packaging	Special vertex/DNA packaging	DNA packaging*	16	HBA75_05850	oppB	ABC transporter permease	P	Metabolism	28	0.137147	C	1	chromosome	20416	NO	3
pBN	pPC_Library	over300	Virion structure and DNA packaging	Special vertex/DNA packaging	DNA packaging*	16	HBA75_07395	seaA	hypothetical protein	S	Poorly characterized	1	0.00489812	C	2	chromosome	20416	NO	3
pBN	pPC_Library	over300	Virion structure and DNA packaging	Special vertex/DNA packaging	DNA packaging*	16	HBA75_14835	proP	MFS transporter	E	Metabolism	114	0.558386	B		chromosome	20416	NO	1
pBN	pPC_Library	over300	Virion structure and DNA packaging	Special vertex/DNA packaging	DNA packaging*	16	HBA75_16200		hypothetical protein	NO		8	0.039185	C	2	chromosome	20416	NO	3
pBN	pPC_Library	over300	Virion structure and DNA packaging	Special vertex/DNA packaging	DNA packaging*	16	HBA75_16385	tlyC	HlyC/CorC family transporter	S	Poorly characterized	22	0.107759	C	2	chromosome	20416	NO	4
pBN	pPC_Library	over300	Virion structure and DNA packaging	Special vertex/DNA packaging	DNA packaging*	16	HBA75_20040	ptsG	PTS glucose transporter subunit IIABC	G	Metabolism	1	0.00489812	C	2	chromosome	20416	NO	1
pBN	pPC_Library	over300	Virion structure and DNA packaging	Special vertex/DNA packaging	DNA packaging*	16	HBA75_27035	ywbA	PTS cellobiose transporter subunit IIC	G	Metabolism	1	0.00489812	C	2	chromosome	20416	NO	1
pBN	pPC_Library	over300	Virion structure and DNA packaging	Special vertex/DNA packaging	DNA packaging*	16	HBA75_27105	cydA	cytochrome ubiquinol oxidase subunit I	C	Metabolism	4	0.0195925	C	2	chromosome	20416	NO	3
pBN	pPC_Library	over300	Virion structure and DNA packaging	Special vertex/DNA packaging	DNA packaging*	16	HBA75_27190	iap	SH3 domain-containing protein	T	Cellular processes and signaling	807	3.95278	B	2	chromosome	20416	NO	6
pBN	pPC_Library	over300	Virion structure and DNA packaging	Special vertex/DNA packaging	DNA packaging*	16	HBA75_27330	manP	PTS transporter subunit EIIA	G	Metabolism	14	0.0685737	C	2	chromosome	20416	NO	5
pBN	pPC_Library	over300	Virion structure and DNA packaging	Special vertex/DNA packaging	DNA packaging*	16	HBA75_27530	nuoL	NADH-quinone oxidoreductase subunit L	C	Metabolism	1	0.00489812	C	2	chromosome	20416	NO	5
pBN	pPC_Library	over300	Virion structure and DNA packaging	Special vertex/DNA packaging	DNA packaging*	16	HBA75_28175	yadS	trimeric intracellular cation channel family protein	S	Poorly characterized	29	0.142045	C	2	chromosome	20416	NO	5
pBN	pPC_Library	over300	Virion structure and DNA packaging	Special vertex/DNA packaging	DNA packaging*	16	HBA75_30055	ctp	cation-translocating P-type ATPase	P	Metabolism	7	0.0342868	C	2	pLUSID2	20416	NO	2
pBN	pPN_Library	over300	Virion structure and DNA packaging	Special vertex/DNA packaging	DNA packaging*	16	HBA75_24805	pepA	cytosol aminopeptidase	E	Metabolism	1	0.0104734	C	3	chromosome	9548	NO	6
pBN	pPN_Library	over300	Virion structure and DNA packaging	Special vertex/DNA packaging	DNA packaging*	16	HBA75_30985		phage tail tape measure protein	D	Cellular processes and signaling	9124	95.5593	A	2	pLUSID3	9548	NO	5
pBN	pPC_Library	over300	Virion structure and DNA packaging	Special vertex/DNA packaging	DNA packaging*	16	HBA75_14680	proB	glutamate 5-kinase	E	Metabolism	1	0.00489812	C	1	chromosome	20416	B	15
pBN	pPC_Library	over300	Virion structure and DNA packaging	Special vertex/DNA packaging	DNA packaging*	16	HBA75_16430		DMT family transporter	E	Metabolism	5	0.0244906	C		chromosome	20416	NO
pBN	pPC_Library	over300	Virion structure and DNA packaging	Special vertex/DNA packaging	DNA packaging*	16	HBA75_18350	iap	SH3 domain-containing protein	T	Cellular processes and signaling	1	0.00489812	C		chromosome	20416	NO
pBN	pPC_Library	over300	Virion structure and DNA packaging	Special vertex/DNA packaging	DNA packaging*	16	HBA75_18655	rny	ribonuclease Y	S	Poorly characterized	4	0.0195925	C	1	chromosome	20416	NO
pBN	pPC_Library	over300	Virion structure and DNA packaging	Special vertex/DNA packaging	DNA packaging*	16	HBA75_19295	ftsA	cell division protein FtsA	D	Cellular processes and signaling	1	0.00489812	C	3	chromosome	20416	C	31
pBN	pPC_Library	over300	Virion structure and DNA packaging	Special vertex/DNA packaging	DNA packaging*	16	HBA75_21205	pstC	phosphate ABC transporter permease subunit PstC	P	Metabolism	1	0.00489812	C	3	chromosome	20416	NO
pBN	pPC_Library	over300	Virion structure and DNA packaging	Special vertex/DNA packaging	DNA packaging*	16	HBA75_22945	ysdC	M42 family metallopeptidase	G	Metabolism	1	0.00489812	C	3	chromosome	20416	A	34
pBN	pPC_Library	over300	Virion structure and DNA packaging	Special vertex/DNA packaging	DNA packaging*	16	HBA75_25590	yidC	membrane protein insertase YidC	U	Cellular processes and signaling	2	0.00979624	C	3	chromosome	20416	NO
[truncated: 2,887 more rows]

## Sheet: Supplementary_Table_4
Supplementary Table 4. Prey proteins tagged as “sticky” preys detected in this work.
Bt_Locus	Bt_Annotation	Promiscuity factor (number of bait partners)
[truncated: 36 more rows]

## Sheet: Supplementary_Table_5
Supplementary Table 5. Interactions detected for the combinations including the empty plasmids and tagged as “false positives”
[truncated: 40 more rows]

[truncated: 4 more sheets: Supplementary Table 6, Supplementary_Table_7, Supplementary_Table_8, Supplementary_Table_9]
